# Supplementary material
Source: publisher figshare collection journal article supplement (https://gsajournals.figshare.com/ndownloader/files/29038143)
Supplement: Supplementary file 1 [file 29038143]

## Sheet: Supplementary file 1
Gene_EnsembleID	T_07_07_A082a	T_06_01_A033a	T_06_11_A168a	T_06_04_A296a	T_07_11_A090a	T_06_06_A349a	T_11_03_A138a	T_03_11_A244a	T_10_11_A059a	T_04_02_A274c	T_10_12_A046a	T_11_03_A060a	T_07_09_A064a	T_07_08_A346a	T_06_11_A455b	T_04_04_A207b	T_04_06_A027c	T_04_12_A158b	T_05_01_A082b	T_05_03_A215c	T_05_06_A121b	T_05_08_A230b	T_06_02_A026a	T_06_05_A309a_3	T_06_09_A196a_2	T_06_11_A299b	T_07_02_A073a	T_07_02_A181a	T_07_02_A216a	T_07_03_A187a	T_07_06_A104a	T_07_06_A323a_1	T_07_10_A153a_1	T_07_10_A215a	T_07_10_A314a	T_08_01_A194a	T_08_02_A333a	T_08_03_A203a	T_08_05_A123a	T_08_06_A060a	T_10_10_A222aa	T_10_11_A100a	T_10_11_A128a	T_10_11_A130b	T_10_12_A057a	T_11_02_A148a	T_11_02_A171a_2	T_11_04_A026b	T_11_05_A018b
RP1-67K17.4_ENSG00000237851.1	25	12	44	67	34	29	17	10	23	76	20	30	29	35	23	22	21	2	68	20	41	19	15	4	9	8	35	10	12	20	4	31	18	22	65	44	6	9	27	27	16	16	19	18	9	4	24	28	16
CTU2_ENSG00000174177.7	971	2095	567	1401	1112	3397	2341	1960	1569	558	1698	955	1417	1551	860	684	576	97	1129	3252	1664	408	1784	1015	428	1946	534	525	2360	953	2296	1339	1813	1447	2099	779	1358	2911	1895	1316	845	1171	1226	734	2733	1128	1873	1502	1262
OR5BE1P_ENSG00000225538.1	0	0	0	0	0	0	0	2	2	0	0	0	0	0	0	0	0	0	0	1	0	0	0	0	2	0	0	0	0	0	0	0	0	0	0	0	0	0	0	0	0	0	0	2	0	0	0	0	0
RP11-1212A22.6_ENSG00000257527.1	12	9	5	6	16	12	22	10	12	11	21	12	13	13	20	3	21	1	5	26	15	17	15	16	4	0	13	1	4	5	13	16	25	16	23	0	5	2	11	10	8	11	8	4	8	6	16	12	8
AC025431.1_ENSG00000243765.1	2	1	0	0	0	1	0	0	1	1	0	0	5	1	0	0	0	0	0	0	0	0	0	0	0	0	0	0	1	0	2	1	1	2	2	1	0	1	1	0	0	1	0	0	1	0	0	1	0
NCAPD3_ENSG00000151503.7	1461	3437	723	1186	1042	2373	2205	3095	2125	910	1944	1111	1606	2411	442	1077	467	85	612	1554	688	758	1695	1910	823	972	1575	709	1148	1274	3079	1378	2293	2535	1163	2063	2063	4549	1739	2123	969	1604	1641	673	6489	2755	2757	2059	1815
OR8L1P_ENSG00000254903.1	0	0	0	0	0	0	2	0	0	0	0	0	0	0	0	0	0	0	0	0	0	0	0	9	0	0	0	0	0	0	0	0	0	0	2	0	0	0	0	0	0	0	0	0	0	0	0	0	0
RP11-1212A22.3_ENSG00000254681.2	13192	28572	9210	19620	13331	33460	18947	11407	24870	10716	36804	19764	17975	17589	10789	18992	8777	664	4377	16103	18091	8943	27755	1816	6733	8048	6299	5031	13996	20053	20155	37477	20884	20139	29719	13010	19827	41799	55983	20218	39136	45576	34177	13769	40068	14584	45655	32601	31051
RP11-98O2.1_ENSG00000250501.1	2	0	3	8	3	2	4	3	2	7	3	2	4	2	5	2	0	1	7	5	3	4	0	3	3	4	3	0	1	3	0	1	1	1	3	1	0	0	3	1	2	0	0	1	1	2	2	1	2
RP3-342P20.2_ENSG00000228477.1	884	1856	561	1041	1124	1908	2033	2669	1242	546	1000	772	1004	2198	305	1562	306	173	340	1149	312	454	1082	669	402	1026	287	220	2097	426	2270	1182	1896	1467	1626	319	1291	2757	838	545	509	517	632	393	2314	1636	948	1084	1254
RP11-159C21.3_ENSG00000233664.1	0	0	0	0	1	1	1	0	1	0	1	0	0	0	0	0	0	0	2	1	0	1	0	0	0	0	0	0	0	1	0	2	0	0	0	0	0	1	1	0	0	0	0	0	1	3	0	1	0
AC006001.1_ENSG00000177418.1	67	111	59	112	73	132	159	105	111	78	122	167	140	126	64	75	44	2	73	87	144	142	200	17	90	55	47	24	68	129	56	108	98	85	153	92	112	94	92	97	114	140	110	43	122	67	105	114	149
ZFYVE28_ENSG00000159733.9	1498	3610	1457	2364	2875	1715	1842	1649	3710	1558	1890	1067	2135	233	1144	2749	1238	349	1104	3430	1689	655	3192	493	956	766	905	433	3462	3030	2539	2473	2294	2322	492	2587	2749	1494	4957	2232	2239	1697	3996	2124	4827	2583	2509	3670	3502
MTMR9LP_ENSG00000220785.3	2820	1479	2451	2903	2132	918	2125	924	2438	2054	2168	2070	1764	391	950	2755	1711	131	1530	1658	1827	753	1639	25	903	258	840	272	927	2810	1768	1390	1777	1335	647	1782	1471	773	2787	3018	3686	2521	3143	3294	2325	1822	2350	4630	2295
U6_ENSG00000207071.1	0	0	0	3	0	0	0	1	0	0	0	0	0	0	0	0	0	0	0	0	0	0	0	0	0	0	0	0	0	0	1	0	0	0	0	0	0	0	0	2	0	0	0	0	0	0	0	2	0
AP000361.2_ENSG00000237472.1	0	1	1	0	0	0	1	0	0	0	0	0	0	0	0	0	0	0	0	2	0	0	0	4	0	3	0	0	0	0	0	0	0	1	0	0	1	0	0	0	0	0	0	1	1	3	1	2	2
SPINT3_ENSG00000101446.7	0	0	0	0	0	0	2	0	0	0	1	0	2	0	0	0	0	1	0	0	0	0	0	1	0	0	0	0	0	0	0	0	0	0	0	0	0	0	0	2	0	3	0	0	0	0	0	0	0
MIR609_ENSG00000208033.1	2	0	2	1	2	0	5	0	1	1	3	1	0	0	2	2	0	0	1	22	0	0	0	4	0	0	0	0	3	2	0	3	1	3	0	4	2	1	0	0	1	1	0	0	1	5	1	2	3
RP11-598P20.5_ENSG00000254673.1	811	964	397	659	476	1211	2153	1194	570	730	998	622	1039	2231	311	262	195	47	305	313	124	266	1113	1011	179	207	549	437	798	491	1997	677	713	1737	676	290	621	1609	991	363	399	604	613	474	1578	847	1478	779	1359
ZNF705G_ENSG00000215372.5	9	3	5	1	1	1	4	0	2	3	4	2	3	0	3	6	1	1	39	0	0	0	3	15	0	0	7	0	1	2	0	27	2	0	1	5	5	4	16	1	4	21	1	2	0	0	2	0	1
MTND6P8_ENSG00000248136.1	0	8	0	0	0	0	3	4	0	0	0	0	0	8	0	1	0	0	0	0	3	0	1	11	0	4	1	0	1	0	2	0	2	3	5	0	0	0	0	0	0	7	0	0	8	12	15	0	0
MIR208B_ENSG00000215991.1	6	0	0	0	0	0	0	0	0	0	0	0	0	0	0	0	30	0	0	0	0	0	0	0	0	0	0	0	0	0	0	0	0	34	0	1	0	1	0	0	6	0	1	0	0	0	0	0	3
CR392000.2_ENSG00000246129.1	8	1	7	13	4	3	5	2	1	6	31	4	84	9	7	8	13	3	9	75	15	10	5	0	5	3	3	3	5	14	9	9	4	4	4	6	11	31	11	10	14	18	17	2	14	22	8	42	9
RP11-571I18.2_ENSG00000251105.1	0	2	0	1	0	2	0	0	2	0	0	0	0	2	0	0	0	0	1	0	0	0	0	2	0	0	0	0	0	2	0	4	0	0	0	0	0	1	1	0	0	0	0	0	0	0	0	0	0
RP11-54A22.1_ENSG00000234960.1	25	8	6	8	1	13	22	4	11	15	3	17	17	6	6	4	9	5	5	12	14	12	7	35	0	6	2	2	16	4	4	15	10	10	15	7	28	18	8	0	8	8	5	6	7	11	5	21	15
AK1_ENSG00000106992.13	2759	4442	1025	3922	2806	4205	2986	2670	3449	1982	2091	1200	5060	2646	1127	2816	1277	249	620	4711	1339	870	5337	1857	1352	696	1131	1126	5274	1656	5164	2941	5171	2318	3527	962	2336	1425	2033	1810	2471	1463	3133	2504	3322	4738	3234	5838	3340
GALNT6_ENSG00000139629.9	4151	3867	1993	3340	4458	1870	3579	4491	2215	2914	2057	816	10251	2573	8447	3812	735	569	731	4336	1305	1154	5513	565	2006	1546	1689	2466	20782	1308	6876	750	4339	3379	735	822	10367	5251	2096	1516	866	1614	3023	283	1199	11521	1088	1087	10882
DYRK3_ENSG00000143479.11	363	422	121	392	140	443	155	133	346	219	540	160	217	207	127	68	78	23	167	149	112	41	282	37	108	55	70	461	215	161	428	752	295	574	210	161	188	184	196	184	221	202	149	56	58	182	459	294	184
YTHDC1_ENSG00000083896.7	6386	4260	4671	7242	6612	7266	6169	5976	4863	7694	5491	6386	4772	5176	6635	4359	4272	3438	6393	8043	4931	4578	4113	3066	3420	3526	5503	10140	7616	4457	7635	5699	5974	7401	8569	5219	5040	5444	4775	4654	3199	4805	5411	3977	5863	6311	4501	6701	4794
AC008751.2_ENSG00000243642.1	19	3	10	4	6	1	11	1	20	6	17	10	5	1	7	5	20	1	7	7	6	3	6	0	3	1	28	0	5	17	8	4	10	15	4	8	1	5	7	15	23	12	8	8	4	5	12	13	14
RP11-477L16.2_ENSG00000225118.1	11	1	7	2	7	2	0	3	3	1	7	0	7	2	2	1	2	0	2	2	1	2	5	4	0	3	1	3	5	12	11	10	7	11	0	2	3	6	3	3	2	5	7	4	6	4	4	6	8
GALNT12_ENSG00000119514.5	983	8002	583	1511	1035	444	3318	3726	321	1498	2589	1704	6197	4091	1261	2445	234	143	289	997	391	277	3863	666	725	108	111	642	3882	1766	4438	757	2570	2003	84	1964	3041	3069	854	741	2004	2191	1111	573	2815	8874	3315	1094	3070
RP11-74C1.2_ENSG00000223861.1	67	139	93	142	75	82	129	65	55	261	85	86	146	147	183	167	94	69	129	111	276	151	148	53	100	48	14	323	166	82	153	152	146	77	117	73	129	178	51	34	50	77	115	65	114	141	66	115	93
RP11-3G20.1_ENSG00000254209.1	2	1	1	0	0	0	0	0	1	0	0	1	0	0	0	0	0	0	0	0	0	0	0	2	0	0	0	0	0	0	0	0	0	0	0	2	0	0	0	0	0	1	0	0	0	0	0	0	1
GAPDHP14_ENSG00000236056.1	11	28	44	56	10	11	29	0	13	30	9	16	7	4	122	150	8	5	9	43	32	6	2	24	113	0	23	4	16	25	41	13	28	14	16	29	17	17	63	41	19	138	19	20	10	18	7	32	9
KRTAP4-7_ENSG00000240871.3	2	0	0	0	0	2	0	0	0	0	0	0	0	0	0	0	0	0	0	0	0	0	0	4	0	0	6	0	0	0	0	3	0	0	0	0	0	0	0	0	0	0	0	0	0	0	0	0	0
RP11-528L24.3_ENSG00000234602.3	35	70	37	13	126	26	96	182	32	10	34	56	41	84	14	15	12	0	47	46	72	1	26	27	11	15	0	0	134	66	98	77	20	23	6	61	28	50	7	83	40	54	29	14	100	48	20	87	58
CTD-2643K12.1_ENSG00000258895.1	22	24	16	15	26	16	21	14	27	14	13	9	29	30	11	51	15	2	27	32	17	3	13	18	2	13	9	4	33	14	15	24	25	35	25	11	12	23	11	16	13	15	12	10	34	26	20	25	26
RAP1GAP_ENSG00000076864.12	13542	4546	6468	3935	8658	14736	7219	5010	1953	4496	16995	5854	8636	1296	11966	3664	15890	477	826	3886	5167	1240	13131	1844	922	2474	888	5374	12100	9124	14172	6157	10739	32285	1594	12628	14532	7004	11644	9876	21746	8270	12568	4601	11410	12041	12372	7769	20491
EPS15_ENSG00000085832.12	3947	2563	2056	3074	3149	2603	2560	1926	4434	2629	3683	2437	2199	2637	1557	1474	833	296	720	1360	1456	466	1826	2024	994	1552	1783	846	2130	2122	4525	1491	4004	3315	1565	1482	2092	2043	2772	2865	1169	1956	2089	1274	2739	2682	3212	3813	3032
CTD-2139B15.5_ENSG00000249199.1	1	0	0	0	0	0	0	0	0	0	0	0	0	0	0	0	0	0	1	0	1	0	0	0	0	0	0	0	0	0	0	0	0	0	1	0	0	2	0	0	0	0	0	1	0	0	0	0	0
HSPA7_ENSG00000225217.1	996	307	474	1857	873	939	943	122	22242	1814	2444	1759	1588	754	216	2310	1001	37	2726	23418	1656	161	394	299	292	354	708	1137	545	2704	862	2121	1039	499	7589	1469	1270	1558	2131	2212	2672	1599	2221	833	2210	1596	1554	2289	2400
RP11-724O16.1_ENSG00000251569.1	203	139	106	90	128	119	154	69	189	43	349	198	109	174	122	62	51	4	51	85	52	22	102	46	32	24	120	30	138	170	230	83	120	240	74	82	57	120	144	166	124	127	106	58	6	136	277	165	108
MTUS2-AS2_ENSG00000236758.1	13	0	5	3	0	6	0	0	2	0	6	3	0	0	0	2	7	0	4	0	2	0	0	14	0	0	3	0	14	0	2	0	5	5	0	0	0	3	0	10	18	0	3	0	0	4	3	15	0
DEPDC7_ENSG00000121690.5	88	64	128	177	192	80	296	48	239	66	161	58	14	10	193	10	36	0	43	22	51	13	19	19	9	993	16	2	46	122	110	231	88	122	224	26	22	41	89	58	142	60	70	75	13	38	188	67	164
U7_ENSG00000253034.1	13	46	17	52	30	13	20	13	18	51	22	25	25	62	22	9	12	2	18	14	28	5	11	21	20	8	11	6	25	20	29	17	28	20	23	27	45	37	21	14	15	28	24	17	34	25	19	27	16
AC011456.1_ENSG00000221504.1	0	1	0	0	0	0	0	1	0	1	0	1	0	0	0	0	0	0	0	0	0	0	0	0	0	0	11	0	0	1	0	0	0	0	0	0	0	0	0	1	1	0	0	0	0	0	0	1	1
Y_RNA_ENSG00000207283.1	0	0	0	0	0	0	0	0	0	1	0	0	0	0	0	0	0	0	0	0	0	0	0	1	0	0	0	0	0	0	0	0	0	0	0	0	0	0	0	0	0	0	0	0	0	1	0	0	1
PCDHA6_ENSG00000081842.13	1217	447	879	120	536	288	1218	6	578	99	686	578	169	1435	72	717	343	124	419	206	51	144	488	77	90	14	369	63	839	251	1135	298	657	934	34	154	707	1872	768	380	233	240	370	174	37	347	694	680	473
AC005281.1_ENSG00000226690.2	4	1	5	1	8	8	48	1	4	2	0	10	7	4	6	0	0	0	5	42	2	7	6	23	4	4	0	0	9	2	3	2	9	17	2	3	14	6	4	0	3	16	0	3	1	7	3	8	0
RP11-774D14.1_ENSG00000251629.2	3	1	2	2	4	3	12	0	2	1	1	2	2	3	3	3	1	2	0	6	0	0	1	46	0	0	1	1	0	6	0	5	1	0	2	1	1	0	2	0	1	2	0	3	0	2	0	0	2
RAI14_ENSG00000039560.9	6275	6748	2433	9614	2631	11998	7690	2074	3817	10105	7726	4225	4226	8709	2174	2717	1876	1669	2399	4132	2921	1214	5631	5498	2961	1429	1476	2427	4065	4251	13363	8661	7025	4557	13452	2858	3329	11627	4846	2337	2385	3826	2961	4015	2729	4938	9210	4675	3607
RP11-193I22.1_ENSG00000234562.1	55	53	46	32	52	50	36	56	67	30	63	54	34	28	10	39	15	2	30	27	38	20	36	27	21	19	29	16	47	53	72	60	41	78	28	46	40	42	38	50	33	42	26	29	41	36	77	69	43
FERMT3_ENSG00000149781.8	3980	1836	4968	10061	4064	7910	1991	2254	12670	7479	3878	2755	17832	4183	2765	10720	1883	253	875	8108	3348	563	1462	3634	2471	767	1995	2986	17449	5448	8332	2182	10694	14017	2286	6625	18486	18338	6158	6569	4200	5237	9086	3972	25103	13251	3615	5868	3956
SEPT7P4_ENSG00000240651.1	14	10	7	12	6	16	19	7	11	12	24	18	11	17	4	4	1	2	5	3	4	5	14	14	4	8	11	10	14	7	15	13	19	19	6	3	27	19	6	4	2	9	10	3	21	19	24	6	21
LA16c-60G3.7_ENSG00000213727.3	6	8	3	8	4	12	5	0	6	2	13	0	15	10	0	3	5	2	5	11	1	3	2	29	0	17	1	3	11	1	9	2	10	14	1	4	2	2	12	7	4	11	8	5	6	10	17	11	13
RP11-39K24.7_ENSG00000236567.1	59	30	30	42	67	29	39	115	84	65	58	23	53	28	28	49	95	5	22	34	78	29	41	25	90	35	31	79	74	36	24	134	65	57	16	87	96	87	72	119	79	50	76	82	139	53	46	146	77
RP11-269M20.1_ENSG00000213956.4	87	165	47	59	81	147	120	156	83	47	68	55	74	163	17	51	12	6	30	86	36	30	148	84	14	81	16	23	143	29	108	100	125	109	64	20	123	135	59	41	14	18	44	20	161	159	60	74	132
INSM1_ENSG00000173404.3	1585	5	448	116	60	79	57	34	0	8	829	319	3	2	14	92	629	11	11	133	250	10	193	7	10	0	221	0	2818	39	645	10	1019	394	4	107	28	132	216	525	265	20	1351	42	2	284	647	2172	506
COX6A1_ENSG00000111775.2	1819	3214	1047	1581	1714	1793	2464	5141	1153	1038	1280	1364	1060	1702	468	2066	589	90	732	6160	776	476	6500	380	347	4330	756	433	5856	822	3556	2787	2534	2194	1329	273	2159	4342	2014	544	473	567	875	468	2893	2587	1594	2295	2415
RP11-154P18.1_ENSG00000236725.1	221	92	132	137	83	164	386	148	166	152	237	234	255	232	301	196	153	47	256	304	118	373	178	43	49	66	177	51	127	114	119	140	184	143	297	139	203	333	126	151	187	157	123	125	148	96	177	204	399
RP11-88J22.1_ENSG00000254318.1	0	0	0	1	0	0	0	0	0	0	3	0	0	0	0	1	2	0	0	0	0	0	0	3	0	0	4	0	0	0	2	0	2	0	0	0	0	0	0	0	0	0	0	5	0	1	0	0	5
RP11-666A20.4_ENSG00000248787.1	46	28	91	97	69	47	33	65	88	65	30	99	27	96	168	31	55	27	182	111	91	38	36	18	39	41	41	21	90	40	34	61	27	24	57	41	73	42	43	36	32	33	93	42	37	29	24	33	38
MYH7_ENSG00000092054.11	221	11	17	15	16	4	32	0	0	9	41	8	4	26	0	3	934	3	7	15	3	2	0	23	4	0	2	1	20	10	5	7	9	705	8	40	8	15	18	30	277	20	13	1	6	13	37	21	99
SEPT12_ENSG00000140623.6	8	3	10	9	12	13	48	0	4	3	8	17	6	0	39	13	16	4	4	14	11	18	0	22	1	0	36	14	19	7	4	16	8	1	17	13	0	25	11	6	3	7	12	34	14	10	16	11	2
AL138751.1_ENSG00000198100.1	33	39	18	18	15	47	53	48	20	8	33	24	46	30	28	20	3	2	19	37	17	22	27	33	11	9	29	31	49	24	51	19	49	25	19	19	5	31	12	5	8	5	16	8	24	34	21	28	31
RP11-231E6.1_ENSG00000243081.2	23	8	2	7	6	5	43	0	8	5	10	35	42	1	59	4	4	6	2	12	9	7	32	8	4	307	3	7	6	98	6	2	2	12	3	25	15	20	15	9	37	9	4	3	1	2	11	4	16
AL359273.1_ENSG00000244369.1	1	0	0	0	0	0	0	0	0	0	1	0	1	0	2	0	0	1	0	0	0	0	0	0	0	0	0	0	0	0	0	0	0	0	2	0	0	0	0	1	0	1	0	1	0	0	0	0	0
RP11-794P6.1_ENSG00000255428.1	6	0	0	1	1	7	2	0	2	2	2	2	2	0	2	0	0	2	4	3	2	1	2	6	0	1	4	0	0	2	0	0	2	0	5	0	2	6	0	1	0	2	3	0	0	0	4	0	0
ARID2_ENSG00000189079.9	2607	2081	1876	1889	2185	1639	2716	2975	2505	2071	2736	2297	2343	1322	1400	1024	675	131	1307	1336	791	606	1952	819	600	1661	1902	782	2584	1939	3516	2599	2502	3459	1730	2598	1845	2465	1820	1757	1763	2413	1787	851	3068	2488	2683	2320	2352
RP11-290K4.2_ENSG00000242536.1	0	0	0	3	0	0	2	0	0	1	0	0	0	0	1	0	0	0	0	0	0	0	0	8	0	0	0	0	0	1	0	0	0	0	0	0	0	0	0	0	0	0	0	1	0	0	1	0	0
DPYSL2_ENSG00000092964.10	5893	5326	1497	3055	2301	1859	2011	2012	4742	1744	6335	1287	3239	4974	1962	581	802	318	340	1811	394	235	3853	4060	367	970	1576	259	3948	1503	7633	3213	4077	4790	1705	532	2841	3095	3446	1754	1007	2797	3438	1950	8283	3794	8412	4244	2791
AC116562.1_ENSG00000221301.1	1	1	0	0	4	0	0	3	4	0	0	0	0	1	0	2	1	0	0	0	2	2	0	0	0	0	0	0	1	0	0	1	0	0	0	0	1	0	0	0	0	0	0	0	0	2	2	0	0
RP11-1212A22.2_ENSG00000214940.4	11531	18821	8887	17370	11217	23994	16562	8972	19117	9817	22839	14758	14447	14068	10955	16930	8041	1288	5323	19512	18279	8674	22238	1222	6688	6079	6270	8238	11241	17607	14678	26192	16930	15577	22231	12582	14277	26180	43513	18774	32642	39265	28768	12740	32234	14232	33070	24488	22788
TREML2_ENSG00000112195.8	6	89	1	16	83	16	16	7	14	29	9	5	793	165	9	10	0	2	16	11	5	8	3	1	24	17	0	1	5	15	66	5	108	4	77	4	28	393	27	167	8	0	13	14	32	19	26	1	12
MYH14_ENSG00000105357.9	18163	60772	21064	29608	22209	24893	50233	126642	3287	38299	22381	22207	81587	5450	14077	61289	9266	3574	24722	43079	57899	12556	95777	16691	5877	48608	1391	8382	75048	23230	91641	24056	51537	52076	9567	20966	60170	45401	49716	6448	11135	30115	36776	3755	155301	58977	15532	18631	47682
TMED10P1_ENSG00000254618.1	65	60	58	51	75	51	78	80	75	40	110	99	54	37	92	38	38	2	36	29	93	110	57	19	42	57	42	23	84	75	73	96	48	88	51	104	71	69	82	49	79	107	38	15	68	77	59	43	66
FLOT1_ENSG00000137312.10	16891	21705	14379	15204	15614	15153	25867	15259	20922	14419	19161	14163	54073	19916	18721	12041	10629	1916	16875	16176	18235	6407	28820	7327	5217	16324	10917	11899	14397	14202	22085	12529	24138	16808	16839	16810	43588	12906	19594	12310	13535	14655	17789	9838	12710	26446	23181	17044	24756
AC074389.6_ENSG00000205971.1	6	8	1	15	2	9	1	0	3	8	4	0	2	0	0	0	0	0	0	0	2	2	4	0	0	0	0	0	0	0	4	5	0	6	0	2	5	2	0	8	9	7	20	2	4	0	19	11	0
RP11-189G24.2_ENSG00000228935.1	0	0	0	0	0	3	4	0	0	0	0	5	0	0	0	0	0	0	0	0	0	0	0	15	0	0	0	0	0	0	0	0	0	0	0	0	0	0	0	1	0	0	0	0	0	0	0	0	0
IL36A_ENSG00000136694.7	2	1	0	0	0	0	1	3	1	4	0	0	0	3	1	1	0	0	3	1	0	0	0	11	0	1	1	1	0	0	0	1	2	0	8	0	0	1	0	3	1	0	0	0	3	0	0	2	0
RP11-872J21.2_ENSG00000258530.1	10	6	14	6	9	3	19	0	5	7	5	8	4	3	6	2	8	1	10	29	6	6	9	11	3	0	3	6	25	12	9	4	5	14	3	4	25	8	8	2	6	1	6	3	11	22	3	6	6
RP11-611D20.2_ENSG00000237886.1	91	61	30	219	110	640	153	45	48	32	329	74	38	42	268	86	137	9	200	122	116	170	59	2	84	23	29	68	39	184	119	107	146	66	41	57	47	150	136	199	255	417	141	156	72	59	824	132	91
RP3-395M20.8_ENSG00000238164.2	6781	8322	13704	13655	17928	13916	10571	6852	3305	11306	10917	10347	18010	5783	10538	3852	5809	1021	5499	21193	4563	610	2650	1351	3055	5234	1363	534	9999	23596	14097	3443	20017	6787	3073	16473	45144	5980	51723	7357	12402	13852	24152	4752	14427	8800	7669	32584	14566
AC013272.1_ENSG00000243039.1	1	1	0	0	1	0	0	0	0	0	1	0	0	0	0	4	0	1	0	0	3	3	1	0	0	0	1	2	0	2	0	0	0	0	1	0	0	0	1	0	5	1	0	0	0	0	0	1	0
RNY1P7_ENSG00000207474.1	2	0	0	0	0	0	0	0	0	0	0	0	0	0	0	0	0	0	0	1	0	0	0	2	0	0	0	0	0	0	0	0	0	0	0	0	0	1	0	0	0	1	0	1	0	0	0	0	0
DSE_ENSG00000111817.11	691	1006	284	881	620	2174	1219	215	2072	598	989	797	948	6954	170	208	127	45	219	300	251	71	779	287	181	161	315	82	314	438	2159	898	1136	701	2255	385	281	1887	597	890	467	378	437	337	491	578	1400	626	575
AC016903.1_ENSG00000236634.1	0	0	0	0	0	0	0	0	0	0	0	0	0	0	0	0	0	2	1	0	0	0	0	3	0	0	0	0	0	0	0	0	0	0	0	0	0	0	0	0	0	0	0	0	0	0	0	0	0
RP11-309H21.1_ENSG00000228020.1	12	23	5	5	8	1	7	8	13	4	9	7	18	8	1	3	5	0	1	2	0	2	9	14	5	4	2	5	9	4	11	5	5	9	8	5	11	8	6	1	1	2	8	6	13	10	7	5	7
5S_rRNA_ENSG00000252510.1	5	26	0	11	12	30	12	25	2	3	58	1	9	0	5	4	1	1	1	2	0	3	27	1	3	1	6	0	4	9	76	3	19	32	6	1	5	22	7	3	6	13	2	7	23	17	121	13	16
5S_rRNA_ENSG00000200278.1	15	21	17	2	25	36	12	5	20	2	16	14	16	24	8	15	1	1	6	75	11	3	17	4	2	10	2	1	12	8	9	4	35	12	5	8	14	26	4	5	4	9	4	11	7	9	26	7	10
ELOVL1_ENSG00000066322.7	5085	10900	2516	6596	4475	7990	6453	11576	3466	3150	5225	3428	5914	7074	1645	5822	1527	459	1268	5972	2016	1821	13123	1699	5569	3732	2496	1331	14612	6458	15891	2662	8408	15323	5273	4740	6707	7980	9759	5195	5873	9830	6336	1733	14846	13775	6620	5582	9152
RP11-215I23.4_ENSG00000236539.2	69	110	27	59	59	43	85	100	65	20	78	34	65	51	14	14	13	3	7	24	7	11	44	44	14	43	19	21	75	18	108	44	78	73	31	18	37	79	33	18	9	32	47	22	102	94	64	65	55
U6_ENSG00000206819.1	36	62	45	26	47	19	52	108	32	26	98	62	67	57	20	26	13	6	22	11	70	10	39	46	20	29	11	57	84	27	176	52	48	152	26	33	67	58	46	43	45	62	51	8	117	88	83	36	58
BBS7_ENSG00000138686.5	453	507	183	356	309	479	314	585	399	288	543	425	238	510	125	138	102	8	212	202	92	130	206	388	123	89	254	63	390	278	654	292	280	414	241	177	514	305	371	294	197	314	273	126	472	490	682	446	336
TSGA10IP_ENSG00000175513.4	0	1	2	9	11	8	4	6	16	3	4	0	8	0	3	4	3	0	0	4	6	0	4	3	0	0	4	0	0	18	2	7	19	4	6	1	2	7	13	9	2	2	10	8	4	5	8	14	6
LDOC1L_ENSG00000188636.3	1150	2498	363	802	756	1330	877	2149	503	434	2512	624	893	976	450	265	219	13	190	230	107	419	1512	877	140	349	858	558	1594	416	3728	749	1140	2530	663	213	684	917	885	756	459	1053	1405	317	2726	866	4410	1176	1185
RAD9A_ENSG00000172613.3	1807	3009	2641	4900	2902	3127	2995	3198	2119	2399	2879	3567	5537	3128	2013	4461	1802	376	9860	8643	3694	1289	4888	554	2573	2163	1225	1235	3467	4004	3002	2540	3189	2128	3491	3303	3462	6771	8030	3361	4603	6639	4429	1868	4038	3028	2081	5259	2778
EEF1A1P6_ENSG00000233476.2	159769	249971	45091	118629	128779	102815	134920	185783	108146	62776	183698	57667	121674	212810	28382	32453	25999	18497	18578	22907	9054	15938	109978	96577	21854	88054	86350	61485	115577	64121	246710	87817	224262	246369	121601	15373	92636	147998	82608	90478	33790	45960	94924	88979	187401	104720	209303	133615	130960
AC074322.2_ENSG00000242373.1	1	0	0	0	0	0	0	0	0	0	0	0	0	0	0	0	0	0	0	0	0	0	0	0	0	0	3	0	0	1	0	0	0	0	0	0	0	0	0	0	0	0	0	0	0	0	0	0	0
RP5-1030M6.2_ENSG00000225865.1	3	2	0	1	0	1	1	0	3	0	0	0	0	3	2	0	0	0	2	0	0	0	0	3	0	0	4	0	0	1	0	0	0	1	2	0	0	0	1	2	0	0	0	3	0	0	0	0	0
RP11-415H23.4_ENSG00000234907.1	7	37	1	11	9	6	15	30	7	6	24	3	11	17	0	2	0	0	0	0	2	0	9	15	7	3	3	0	0	0	28	0	8	39	20	3	6	22	27	16	12	10	19	25	41	14	49	24	24
MRPS6P2_ENSG00000237130.1	36	24	15	22	29	40	23	27	45	21	30	26	27	23	13	21	9	5	18	21	16	10	18	15	13	24	11	7	13	11	42	10	20	51	18	18	3	27	13	14	9	20	19	17	40	17	46	27	23
AC013269.1_ENSG00000256066.1	464	1317	131	498	315	643	577	740	339	248	750	169	620	1213	89	431	63	62	48	322	357	31	1766	610	151	342	205	169	825	188	1571	658	978	1927	854	125	1364	879	579	313	237	788	555	208	1932	2163	2258	699	1244
C17orf57_ENSG00000178852.9	1434	1347	2506	1645	1315	849	1550	238	5697	1745	4504	3251	2084	4658	2117	530	645	109	2382	1179	1114	910	939	524	778	189	810	158	528	3899	1843	1557	1824	1388	1981	2227	1150	1943	1561	2781	985	2974	1137	825	370	978	10045	2035	1694
AC233263.2_ENSG00000237261.1	0	0	0	0	1	1	0	0	3	0	2	2	1	1	0	0	3	2	4	3	5	4	0	3	0	2	0	0	0	2	0	0	0	0	0	2	0	4	7	1	2	0	0	3	2	0	0	0	8
RP11-680B3.2_ENSG00000240521.1	11235	224	82	89	30	303	439	17	35	1791	1440	20	79	3443	16	53	8988	257	39	87	37	10	63	686	10	37	9	135	172	107	142	101	120	42702	399	158	59	257	148	48	717	106	120	763	126	84	423	38	1209
RP11-449J1.1_ENSG00000225334.1	7	0	0	0	0	0	0	0	7	6	1	0	2	1	0	0	0	4	0	2	0	1	0	3	1	1	0	0	0	0	0	0	3	0	1	0	0	1	1	2	0	3	1	0	0	0	2	1	2
C7orf40_ENSG00000232956.2	226	149	148	372	305	402	398	595	417	270	183	270	205	529	146	361	133	26	337	947	356	169	175	79	232	315	70	92	335	274	253	436	362	203	445	221	192	427	159	300	313	396	184	145	697	366	203	545	315
OR2AO1P_ENSG00000240621.1	13	5	25	34	13	22	14	12	17	124	16	12	22	18	38	12	24	9	9	6	18	77	28	10	18	23	54	26	5	24	9	24	15	12	17	32	13	6	24	19	12	42	25	10	9	27	9	16	12
RP11-780K2.1_ENSG00000257359.1	104	144	59	94	92	121	90	134	121	52	124	72	60	112	89	64	29	3	57	124	110	62	80	32	46	92	100	165	135	102	145	102	106	151	41	113	83	297	70	127	36	139	107	25	78	33	117	139	110
RP3-412A9.12_ENSG00000235573.1	0	1	0	0	1	6	1	2	0	0	2	0	1	0	2	0	2	1	8	0	2	3	0	3	1	0	0	0	0	0	0	4	1	0	1	2	0	4	0	0	0	2	0	4	0	0	3	2	0
MIR650_ENSG00000207836.1	2	0	1	24	54	7	0	73	22	18	1	7	2	1	1	9	0	1	0	16	4	12	15	11	1	0	0	0	22	7	40	1	56	40	3	0	39	0	33	9	0	4	24	3	51	43	2	223	39
U6_ENSG00000222791.1	0	0	3	0	0	0	0	0	0	0	0	0	0	0	0	0	0	0	0	0	0	0	0	4	0	0	0	0	0	0	0	1	0	0	0	0	0	0	0	0	0	0	0	0	0	0	0	0	0
AP002414.1_ENSG00000212712.1	4	0	5	1	0	0	1	0	0	1	3	4	4	0	1	1	3	0	2	4	1	0	0	11	3	3	2	0	1	0	2	3	0	2	3	3	1	1	0	2	2	0	1	0	2	2	2	0	0
DIO2_ENSG00000211448.6	726	859	380	2928	133	2160	1168	187	101	1618	715	936	337	88	109	210	76	41	237	354	453	158	841	357	55	241	133	54	172	212	5578	893	931	608	1211	153	367	957	1232	435	193	372	460	877	342	819	2119	1122	414
AL627169.2_ENSG00000242410.1	0	0	0	0	0	0	0	0	0	1	0	0	0	0	0	1	0	0	0	0	0	0	0	0	0	0	0	0	0	0	0	0	0	0	0	0	1	0	0	0	0	0	0	0	0	0	0	0	0
AC073115.7_ENSG00000229628.1	7	0	5	22	16	57	0	0	6	1	5	17	0	1	1	4	3	9	6	12	13	1	2	3	6	0	3	2	2	7	4	11	27	2	20	7	3	5	2	25	8	6	4	5	3	16	1	3	13
EPS8L1_ENSG00000131037.8	5779	24109	13797	28872	7825	35275	12158	22173	1659	39368	8770	52352	26025	51808	9020	50542	13838	8549	14886	22546	26336	6506	33142	10388	29504	8490	566	15291	34172	13552	20986	9630	20644	17771	14391	14541	22272	29888	45020	2585	20704	14467	27882	7943	45796	22344	7938	16398	23058
RP11-290L1.7_ENSG00000198923.3	0	7	0	2	0	0	1	0	1	0	1	1	0	0	0	3	0	0	0	1	0	0	2	0	0	0	0	0	0	0	1	2	1	3	0	5	0	3	3	0	0	0	0	0	3	4	0	0	4
MFSD1_ENSG00000118855.12	2290	4804	526	823	1245	2754	1873	2005	2274	1009	2085	1106	2392	3500	300	672	271	70	206	1084	194	103	1898	710	164	388	1699	89	1890	923	3815	986	2501	3811	718	336	1627	2568	1296	939	450	645	643	367	1604	1505	1693	1801	2037
RP11-350N15.4_ENSG00000255201.1	183	152	49	207	91	84	196	7	670	87	363	131	53	23	47	31	153	4	43	39	26	29	125	26	19	15	44	10	54	96	325	115	142	279	127	100	38	63	83	171	148	147	145	48	35	81	818	172	164
SLC25A11_ENSG00000108528.8	2165	2402	735	1255	1794	3457	1701	6138	1637	806	2557	988	1802	1605	676	785	853	95	537	1795	579	1460	3263	1588	579	1622	1632	872	2646	1070	4727	2088	2963	4071	1232	449	1777	2330	2246	1113	975	958	1613	746	2481	1320	3801	2375	2000
RP11-460N16.1_ENSG00000240405.1	7	2	3	8	5	6	7	3	8	4	7	7	4	2	2	10	3	2	27	18	10	6	7	11	0	1	1	1	8	1	5	22	2	4	7	5	6	5	1	0	2	10	2	0	3	3	2	2	1
RP11-126H7.3_ENSG00000233871.1	27	18	12	20	22	32	32	6	15	7	32	17	30	22	5	8	17	9	5	44	10	9	33	0	0	6	13	3	31	13	20	17	34	12	18	5	23	68	29	13	12	16	12	14	4	23	38	15	26
MUDENG_ENSG00000053770.7	1439	1471	641	630	1024	1557	1903	1337	854	807	1625	885	1304	1272	591	553	185	83	604	605	310	529	994	487	350	852	543	717	1358	547	2194	673	1358	1595	353	414	1471	1288	1080	468	791	679	822	483	1118	1347	1314	1030	1126
U6_ENSG00000251777.1	11	14	5	14	15	15	13	34	10	15	20	18	16	21	6	23	6	1	8	10	29	16	11	3	7	11	4	4	15	17	22	19	6	15	5	20	32	18	5	28	17	22	10	4	27	24	26	11	45
RP11-175I6.5_ENSG00000233424.1	8	7	9	4	12	3	22	3	8	2	4	24	5	3	7	17	14	1	25	9	6	34	4	27	1	7	18	2	5	8	3	8	8	2	2	4	0	7	6	18	35	25	6	19	1	7	14	9	6
MTND5P15_ENSG00000231888.1	7	0	6	2	9	1	1	6	3	2	0	4	3	4	18	4	3	4	0	10	3	23	4	2	6	15	3	3	11	0	0	10	0	3	0	5	0	7	5	2	2	2	2	1	0	0	3	1	2
RP3-425P12.5_ENSG00000229313.1	5	0	0	0	1	0	0	1	0	2	1	1	0	0	0	0	0	2	4	2	1	0	0	11	0	0	3	0	0	0	0	0	1	0	3	0	0	1	1	8	0	0	0	0	0	0	0	3	1
U6_ENSG00000207278.1	3	0	1	1	2	0	1	0	0	2	0	0	0	0	2	1	0	0	0	0	3	1	1	4	4	1	2	8	0	6	2	3	0	1	0	1	1	1	2	1	0	14	1	4	0	4	1	2	0
U6_ENSG00000252823.1	0	0	0	0	0	0	0	0	0	1	0	1	0	0	0	0	0	0	0	0	0	0	0	0	0	0	0	0	0	0	0	0	0	1	0	0	0	0	0	0	0	1	0	0	0	0	0	0	0
AC013251.1_ENSG00000242331.1	3	0	0	2	2	2	4	0	1	0	0	0	5	0	0	1	1	0	0	0	0	0	0	1	0	0	0	0	0	6	0	0	1	0	0	0	1	1	1	0	1	0	2	0	1	0	0	0	0
GRIK3_ENSG00000163873.5	868	262	59	91	58	31	61	0	10	1152	350	52	131	22	23	188	96	41	8	59	45	57	540	72	0	2	41	4	116	309	278	32	310	987	4	103	46	97	86	637	281	199	504	1216	20	278	1125	774	587
CCDC144NL_ENSG00000205212.3	43	3	45	28	24	82	45	4	124	24	46	25	8	11	57	23	15	5	9	7	50	50	19	57	55	4	41	11	10	33	25	31	43	19	57	7	2	20	14	11	28	67	111	44	135	18	48	29	34
RP11-314N14.1_ENSG00000250102.1	1	1	1	2	2	2	2	0	1	2	1	3	4	183	1	2	0	1	18	3	1	3	0	13	1	2	4	1	2	0	0	0	1	0	6	1	0	1	0	0	0	2	4	0	1	2	0	3	0
RNU5A-8P_ENSG00000200972.1	2	2	1	1	1	3	0	1	2	0	4	2	1	10	2	0	0	0	3	0	0	1	6	2	0	0	0	1	1	0	1	1	0	6	1	0	0	1	4	1	0	1	1	0	0	1	3	1	0
AC136365.1_ENSG00000221018.1	0	0	0	0	0	0	0	0	0	0	0	0	0	0	0	0	0	0	0	0	0	0	0	0	0	0	0	0	0	0	0	0	0	0	0	0	0	0	0	0	0	0	0	0	0	0	0	0	0
AL139286.1_ENSG00000221032.2	1	0	0	0	0	1	0	0	2	2	1	0	0	0	0	0	0	0	0	3	1	0	0	0	0	0	0	0	1	0	0	0	1	0	0	0	0	1	0	4	0	0	0	0	0	0	0	0	0
FCGR3B_ENSG00000162747.5	165	60	49	24	89	45	118	124	847	176	122	45	151	59	257	84	25	33	41	228	53	153	21	1086	27	17	40	18	43	110	276	165	430	112	405	39	137	155	180	73	32	7	121	380	158	75	116	361	116
U6_ENSG00000206924.1	28	30	29	22	32	32	40	23	26	24	28	29	24	38	12	28	7	3	18	20	12	15	26	4	15	17	11	3	37	27	35	26	27	41	19	34	53	32	39	23	36	70	24	12	27	28	16	23	41
NCRNA00159_ENSG00000230323.1	0	0	0	3	2	1	1	0	7	4	1	0	1	2	1	4	1	2	2	0	0	0	0	5	0	0	1	0	0	3	0	2	3	0	7	0	0	0	2	2	1	2	1	1	0	0	1	1	0
AC009236.2_ENSG00000231054.1	6	3	1	2	0	0	1	0	1	0	0	0	2	1	0	1	1	0	3	0	0	0	6	0	0	0	0	1	4	1	4	6	4	0	1	0	1	4	2	1	0	0	0	0	0	1	1	2	0
CYC1_ENSG00000179091.4	6641	14652	4532	5840	6552	13028	9360	25281	3746	2734	7892	4788	6519	9181	3977	7122	2574	720	2691	7068	8824	7426	14275	9669	3278	14592	2094	3803	17147	4150	11601	27858	9537	11261	5803	3397	5750	19381	8435	6386	6172	9696	6684	3097	21590	9704	12516	8759	11506
RP11-465L8.1_ENSG00000256071.1	3	0	1	0	0	0	0	2	0	0	0	0	0	0	1	4	7	0	2	3	0	2	2	1	2	2	12	0	6	1	2	1	2	7	0	5	0	0	2	3	2	0	1	2	0	1	0	1	2
AC105235.1_ENSG00000254324.1	53	157	27	45	23	62	50	32	21	29	62	37	37	79	24	40	14	8	15	21	22	20	56	80	17	16	13	26	40	28	73	26	35	109	28	73	32	122	47	33	44	61	37	24	57	58	56	34	46
AC112203.1_ENSG00000241771.1	0	0	0	0	0	0	0	0	0	0	0	0	0	0	0	0	0	0	0	0	0	0	0	7	0	1	0	0	0	0	0	0	0	1	0	0	0	0	0	0	0	0	0	0	0	0	0	0	0
UBE2D3P4_ENSG00000224188.1	0	0	0	0	0	1	0	0	0	0	0	0	0	0	0	0	0	0	0	0	0	0	0	0	0	0	0	0	0	0	0	0	0	0	0	0	0	0	0	0	0	0	0	0	0	0	0	0	0
RP13-631K18.5_ENSG00000255400.1	26	13	14	107	10	20	77	0	72	44	30	31	38	16	2	24	4	0	3	13	26	0	19	7	20	6	4	2	18	72	39	45	37	1	64	36	25	133	27	13	16	17	56	1	20	11	20	8	17
AC012362.3_ENSG00000213081.3	2	0	0	0	0	0	0	0	0	0	0	0	0	0	0	0	0	1	0	0	0	0	0	0	0	0	0	0	0	0	2	0	0	0	2	0	0	0	0	0	0	2	0	0	0	0	0	1	0
NUP160_ENSG00000030066.8	2032	2861	1295	1529	2356	3211	4237	2370	3162	1853	2577	2642	2673	2432	1217	1495	658	119	1356	982	1287	736	1281	1661	727	1367	1785	549	1902	1961	3529	1738	2401	3328	2220	2030	2095	2751	2512	2064	1888	2290	1411	1134	2770	2257	2452	2270	1984
Y_RNA_ENSG00000201990.1	17	26	11	17	12	26	34	22	27	14	13	16	22	40	8	16	11	1	36	25	11	25	25	12	8	18	8	15	22	13	12	19	12	24	28	26	26	36	24	24	22	36	18	11	34	17	19	21	35
RP3-406A7.5_ENSG00000216613.1	31	13	25	8	26	18	24	54	10	28	32	16	47	36	12	11	20	30	27	11	48	49	24	26	8	83	5	40	37	7	40	14	26	40	10	16	24	20	11	14	8	10	33	1	30	11	13	16	24
AC079779.4_ENSG00000228643.1	71	8	10	4	25	8	14	9	8	9	119	18	7	4	12	6	35	0	4	2	2	14	27	12	8	5	4	4	14	35	17	10	2	237	15	12	2	14	6	4	57	11	3	12	3	3	11	1	27
PRKRIRP3_ENSG00000227972.1	16	13	12	13	24	16	8	4	25	3	19	17	15	20	14	13	15	8	6	9	18	8	16	18	4	6	12	3	7	15	33	4	29	14	9	7	4	29	6	11	23	22	19	11	14	16	11	20	15
RP4-726N1.2_ENSG00000229262.1	0	0	1	0	0	0	0	1	0	0	0	1	0	0	2	0	1	0	1	0	0	0	0	9	0	0	0	0	0	0	0	3	0	2	0	0	0	0	0	0	0	0	0	0	4	0	0	0	0
NKAIN1_ENSG00000084628.5	118	12	21	21	7	17	8	0	0	8	27	10	11	0	5	2	33	2	5	25	4	0	13	8	4	22	26	0	22	16	42	5	30	35	5	13	2	6	5	48	5	22	21	25	7	23	64	37	28
KCNQ1_ENSG00000053918.10	3521	2513	701	2450	3810	4967	2675	5518	1158	1540	6291	883	2803	374	1457	724	1044	220	148	5717	774	3233	8596	2441	168	9422	3726	3171	734	1795	7125	2429	6100	15037	216	1105	2541	2278	5695	432	2908	826	2754	357	8442	5535	3610	2069	4120
AC013564.1_ENSG00000250434.1	15	7	21	26	13	13	10	14	38	24	5	10	204	15	76	8	5	12	13	17	15	13	6	27	7	9	12	15	8	18	3	8	66	9	11	62	75	3	29	41	12	6	29	11	7	9	3	7	4
RP11-43D2.2_ENSG00000249112.1	87	44	56	23	61	63	89	48	100	58	61	190	98	149	21	48	72	6	114	59	47	15	21	23	9	67	79	3	47	73	63	77	41	142	48	87	132	64	46	64	60	110	75	46	68	40	57	87	120
U6_ENSG00000202095.1	0	0	0	0	0	0	0	0	0	0	0	0	0	0	0	0	0	0	0	0	0	1	0	6	0	0	0	0	0	0	0	0	0	0	0	0	0	0	0	0	0	0	0	0	0	0	0	0	0
C5orf32_ENSG00000120306.5	6246	9017	3349	4978	4859	1582	4099	13151	2923	5368	5277	1903	10539	2322	977	6995	1192	1125	422	12102	1512	1432	15802	5748	1491	3292	1181	8911	18545	3030	10921	4924	8432	10679	781	952	43196	4494	8201	2009	1576	1426	6586	695	19975	42361	4428	7658	15328
SLC7A6OS_ENSG00000103061.5	1430	2680	925	1580	1714	4094	3446	2785	2624	1130	2265	1633	2307	1465	1214	2169	517	105	1174	1700	2179	790	1733	750	912	1791	2875	554	1433	2566	2407	1414	2412	1949	1742	1529	2015	2522	2138	4589	2581	3152	1198	1388	2165	1995	2451	1862	1447
TCTN1_ENSG00000204852.8	2570	2722	1519	1710	2403	1449	2472	164	2863	881	2919	2450	1289	1433	876	1660	1194	157	1119	7956	892	301	1561	319	605	74	969	49	2553	2309	2970	2605	2389	2374	1270	1265	1151	3130	2293	1354	2476	1571	1459	781	177	1657	2251	2535	1811
AC003991.3_ENSG00000228113.1	154	110	109	28	187	901	140	9	50	56	179	106	315	118	62	111	30	2	7	84	23	14	89	74	8	7	76	2	526	139	119	27	210	347	8	46	74	173	130	89	123	62	48	25	12	113	103	68	303
MIR367_ENSG00000199169.1	102	61	79	92	124	132	116	112	90	118	91	135	86	71	80	65	62	19	56	154	81	92	38	39	40	69	61	139	133	70	80	126	90	76	93	59	149	79	73	51	35	50	103	62	62	147	74	145	83
TRAPPC6A_ENSG00000007255.5	490	1077	363	685	661	1920	1680	186	517	422	499	645	1281	1461	397	972	296	63	675	1831	432	514	660	477	201	534	348	252	2804	498	1215	932	1244	693	346	403	4171	1384	514	542	676	849	438	249	1857	1252	664	466	4251
AC005152.3_ENSG00000228639.2	68	3	16	2	32	371	14	0	7	4	93	30	10	5	59	4	152	4	3	2	1	0	11	6	1	5	4	0	21	49	14	634	4	242	7	21	3	4	17	0	140	2	2	245	3	12	36	2	31
MTND2P26_ENSG00000254565.1	10	10	31	24	7	36	10	0	12	50	40	11	22	9	7	10	11	2	6	13	19	0	3	14	12	5	5	5	17	11	25	6	16	10	21	15	6	14	18	11	6	16	13	4	29	19	2	13	16
PRM1_ENSG00000175646.3	0	0	0	0	0	0	0	0	0	0	0	1	0	0	0	0	1	2	0	0	1	0	0	0	0	0	0	0	0	0	0	0	0	0	1	2	0	0	0	0	0	0	0	0	0	0	0	0	0
Z69666.2_ENSG00000228779.1	70	72	119	83	89	110	121	123	81	50	147	117	68	97	124	74	58	13	106	116	197	123	83	23	19	47	82	42	65	99	117	89	113	78	85	49	72	93	88	45	64	92	75	30	109	58	59	87	54
RP1-186E20.1_ENSG00000228997.1	0	0	0	0	0	0	0	0	0	0	0	0	0	0	0	0	0	0	0	0	0	1	6	2	0	0	0	0	0	0	0	1	0	2	7	0	0	2	0	0	0	0	0	0	0	0	0	0	0
RP11-9E13.4_ENSG00000234806.1	4	10	6	2	7	12	15	11	11	6	6	4	7	14	9	8	3	1	8	15	11	10	18	2	3	8	4	14	2	10	2	12	10	0	2	13	13	2	10	4	4	6	5	8	13	8	2	20	3
RP11-312B8.2_ENSG00000227950.1	82	34	19	50	25	104	52	43	73	49	50	43	41	35	14	21	10	2	25	58	12	20	44	7	6	46	27	11	61	31	40	35	43	52	17	13	45	35	27	15	23	12	29	18	59	53	49	61	55
AL353733.1_ENSG00000221708.1	0	0	1	0	0	0	0	0	0	0	0	0	0	0	0	0	0	0	0	0	0	0	0	4	0	0	0	0	0	0	0	1	0	0	0	0	0	0	0	0	0	0	0	0	0	0	0	0	1
AP002783.4_ENSG00000242232.1	0	0	0	0	0	0	0	0	0	0	0	0	0	0	0	0	0	0	0	0	0	0	0	0	0	0	0	0	0	0	0	0	0	0	0	0	0	0	0	0	0	0	0	0	0	0	0	0	0
AFG3L2_ENSG00000141385.3	2389	2158	2109	1829	1683	3072	1806	7442	1241	2018	3331	2529	3580	8453	2072	1413	844	211	1166	1871	1151	3292	4539	2182	690	3719	1424	845	5094	1781	5438	2885	3533	5922	1415	902	5400	5352	1512	1362	1183	2359	1528	770	6199	1923	3159	2192	1868
FOXD3_ENSG00000187140.4	266	62	6	92	10	11	40	4	3	636	131	12	15	27	2	20	10	4	2	10	20	0	41	6	0	0	0	0	5	24	13	0	107	109	15	9	0	17	74	92	40	42	112	224	4	10	167	288	97
RP11-151G14.1_ENSG00000258990.1	0	0	0	0	0	0	0	0	0	1	0	0	0	0	0	0	0	2	0	0	0	1	0	0	0	0	0	0	0	0	0	1	0	0	0	0	1	0	0	0	0	1	0	0	0	0	0	0	2
AC005592.1_ENSG00000236714.1	6	0	16	5	1	8	120	0	53	7	15	3	8	6	25	340	9	0	13	5	7	10	8	20	2	4	98	1	4	19	5	2	2	0	55	12	2	5	8	4	5	4	5	15	15	13	3	6	2
RP11-111F5.1_ENSG00000236450.1	4	0	6	5	10	4	17	2	17	4	6	14	17	9	0	6	0	1	14	1	0	6	7	27	2	1	3	0	6	14	2	4	6	2	6	13	5	8	4	7	7	8	1	2	0	0	0	1	6
CLEC2A_ENSG00000188393.4	1	0	0	3	0	0	0	1	0	0	0	0	0	0	0	0	0	0	2	0	0	1	0	12	0	0	0	0	0	0	0	0	0	0	0	0	0	0	0	0	0	0	0	0	0	0	0	0	0
PIK3C2B_ENSG00000133056.8	2886	7707	2346	3022	3521	1576	3486	2730	2035	2415	4824	3016	5804	2565	1602	3839	1158	224	903	2094	2503	1519	5051	2971	2509	2326	1000	1237	4696	2850	8631	3725	5106	5490	544	4873	4064	5626	3247	3764	2607	6370	4095	1396	7914	5255	4726	4375	7687
FAM3D_ENSG00000198643.2	139	2166	1676	2854	2187	1456	4204	3686	47	353	927	2351	258	40	2023	35	109	174	203	611	4060	619	492	1114	1696	1538	95	172	12543	266	11229	1070	291	508	46	371	507	247	1744	105	539	441	2347	33	4464	1417	541	2280	1116
SYT9_ENSG00000170743.11	293	64	53	50	47	20	30	9	60	25	123	100	13	131	7	4	57	4	22	131	2	7	885	32	9	6	34	35	67	19	137	4	104	432	6	31	493	8	54	67	17	27	84	42	4	135	87	106	244
TMEM233_ENSG00000224982.2	81	23	54	89	69	22	17	10	53	21	20	27	23	8	223	30	27	42	13	35	33	16	57	19	26	10	19	105	55	68	38	13	31	50	9	19	30	19	51	7	11	47	64	75	4	13	69	85	18
FSTL1_ENSG00000163430.4	7293	18282	2282	11762	3452	9507	10467	1111	12840	5996	18086	6055	3739	18321	5153	5192	696	221	1082	5534	531	615	10524	1123	748	771	3229	156	2101	6683	31167	13055	7215	8222	8561	1575	4694	8409	7985	2626	3274	5479	3964	2577	2359	5116	34676	5718	6645
SLC6A16_ENSG00000063127.10	291	63	67	178	411	188	318	29	498	111	323	131	380	214	258	237	401	18	95	128	20	312	64	42	193	22	372	27	72	386	28	311	183	412	554	218	19	125	113	577	883	219	127	352	124	145	266	181	224
RP11-314P12.3_ENSG00000213412.3	453	681	181	137	236	360	916	282	234	162	202	909	955	1186	62	246	44	15	537	481	56	31	212	127	47	130	62	40	342	425	317	360	322	172	310	75	281	1536	257	71	53	82	115	83	224	334	144	161	246
RP11-521B24.5_ENSG00000257270.1	458	451	516	672	508	764	795	570	456	505	381	706	236	320	602	719	443	106	640	1495	592	554	408	93	303	362	303	390	518	680	393	481	615	368	558	772	484	776	756	612	605	760	652	344	548	443	397	817	584
CTD-2320B12.2_ENSG00000259012.1	0	0	0	0	0	0	0	0	0	0	0	0	0	0	0	0	0	0	0	0	0	0	0	11	0	0	0	0	0	0	0	0	0	0	1	0	0	0	0	0	0	0	0	0	0	0	0	0	0
RP11-45F15.1_ENSG00000256739.1	10	48	7	8	21	65	39	56	48	14	44	17	31	46	4	2	7	0	23	19	12	17	63	26	0	48	16	15	35	19	64	15	41	82	34	17	21	71	31	23	8	25	13	2	30	27	74	16	26
AC005301.5_ENSG00000100181.14	388	129	138	313	165	118	93	65	52	484	236	353	61	44	220	74	105	21	79	69	93	18	104	52	31	34	605	358	44	456	175	110	360	135	142	77	72	268	296	234	211	524	239	303	118	123	733	158	710
AL512652.1_ENSG00000203614.3	13	4	10	13	13	17	2	4	3	23	12	7	15	6	8	15	14	4	56	15	19	13	8	1	4	21	6	1	0	23	33	21	16	4	6	8	10	11	9	22	9	21	8	13	6	9	34	2	10
PADI4_ENSG00000159339.8	3	128	3	425	2	35	79	9	6	192	2	597	259	46	9	247	0	4	93	56	10	22	4	28	3	7	8	147	0	1	3	6	48	3	171	136	10	4	325	5	52	165	3	7	5	1	18	3	0
RBBP5_ENSG00000117222.9	850	896	447	477	686	891	787	1096	840	504	1054	542	915	1357	475	383	225	34	328	482	384	227	1233	789	273	542	546	694	1057	387	1974	1081	1019	1289	435	337	1109	1172	572	533	492	681	555	226	1035	778	848	723	720
RP11-298O21.5_ENSG00000244227.1	15	7	0	1	3	1	2	0	0	0	6	0	0	0	2	0	1	8	0	4	4	6	2	25	0	1	25	0	1	5	2	5	3	2	0	3	2	1	14	1	5	1	9	2	1	5	3	5	0
AP001475.1_ENSG00000237338.1	1	2	10	2	1	2	7	0	4	1	5	17	11	0	0	15	28	2	3	1	5	0	9	2	5	0	4	0	35	4	4	6	15	8	10	4	1	5	1	32	3	12	6	8	12	1	11	6	5
C1orf111_ENSG00000171722.6	9	90	31	25	25	9	21	35	7	21	56	26	49	3	23	19	18	1	43	4	36	40	48	19	11	32	4	41	29	21	55	60	36	33	10	39	17	19	49	22	15	87	28	13	75	24	93	31	50
U6_ENSG00000200218.1	1	0	0	0	1	0	1	2	3	0	3	0	0	0	0	1	3	0	1	0	1	0	0	2	0	0	0	0	0	0	1	0	0	0	0	0	0	0	0	1	0	0	0	0	0	0	3	1	0
RP11-472F19.2_ENSG00000233333.1	8	1	6	0	16	0	0	14	9	2	6	4	12	0	10	0	0	0	5	1	0	9	1	12	2	4	0	0	1	0	3	6	3	8	3	2	0	1	0	2	5	7	1	0	0	3	2	2	2
LMTK2_ENSG00000164715.5	2481	3276	1610	1105	1121	2466	2701	4117	1354	2056	2918	2047	6099	3267	966	1602	882	99	843	1472	2386	2298	2926	255	624	1802	572	572	3347	1543	4210	1514	2260	5704	1156	2694	7866	4386	1599	1296	1812	2244	1561	585	4393	2627	2260	2293	3355
AL118508.1_ENSG00000256492.1	240	273	107	50	88	74	202	36	319	76	242	27	113	34	31	24	25	2	20	20	10	21	175	8	9	10	139	2	75	69	294	75	280	338	13	15	39	67	136	105	75	76	108	38	25	50	424	336	97
C1orf86_ENSG00000162585.11	2011	1571	2081	3192	2459	6304	2561	3649	2950	2201	2236	2562	1847	2390	2554	2473	1327	384	1605	6339	1828	2295	2611	1090	670	2592	5906	1508	4459	2390	3376	3331	3322	2487	3433	1432	2803	1983	2865	1752	1762	2507	2438	1651	4097	2949	2738	2534	2861
snoU13_ENSG00000238625.1	0	0	0	0	0	1	0	0	0	1	0	0	0	0	0	0	0	0	0	0	0	0	0	1	0	1	0	0	0	0	0	0	0	0	0	0	0	0	0	0	0	0	0	0	0	0	0	1	0
RP3-340H11.2_ENSG00000217231.1	6	0	0	0	5	0	0	2	5	0	1	0	1	0	0	1	0	0	0	0	0	0	0	3	0	4	0	0	0	0	0	0	2	0	2	0	1	0	0	2	0	0	0	0	0	1	2	2	0
RP11-18D7.3_ENSG00000248816.1	4	16	0	7	1	0	0	1	0	3	11	2	0	0	0	2	4	2	2	0	2	10	0	6	0	2	2	0	1	0	29	4	10	13	17	4	0	0	6	8	29	9	8	8	0	0	22	4	10
UGT1A7_ENSG00000244122.2	808	13291	551	1176	92	3431	2697	737	712	1905	198	3216	915	2211	248	1763	48	306	653	10540	713	107	172	526	28	864	8	36	2690	1081	1253	159	490	4277	771	1268	3096	6703	645	235	264	274	624	9	1341	6188	446	49	5838
ADAMTSL5_ENSG00000185761.5	319	2510	1081	973	1205	423	833	1077	981	1094	501	733	1301	1977	240	896	259	61	431	1492	861	721	779	434	524	1559	78	23	899	1117	1579	461	1180	1472	1916	1236	1522	1515	1879	330	547	1133	2625	300	2700	927	771	677	3702
SNORA5_ENSG00000207002.1	3	0	0	1	1	0	1	0	6	1	5	0	0	0	1	2	0	0	2	0	2	0	2	0	0	0	0	2	0	0	4	3	0	1	4	2	2	1	2	0	1	1	0	0	1	1	2	1	1
ZNF274_ENSG00000171606.12	753	1386	724	811	1032	1301	2163	999	764	1389	937	1307	1794	2070	516	2079	459	142	1225	1465	1624	193	909	696	637	507	659	190	1064	1059	899	646	958	990	1224	1767	1256	1393	1044	907	1122	703	1266	596	840	2143	1108	1029	1106
7SK_ENSG00000252794.1	0	0	0	0	0	0	0	0	0	0	0	0	0	0	0	0	0	0	0	0	0	0	0	3	0	0	1	0	0	0	0	0	0	0	0	0	0	0	0	0	0	0	0	0	0	0	0	0	0
SEL1L3_ENSG00000091490.6	5898	7440	2766	3436	5450	1997	4807	7159	2546	3662	9262	2659	7166	8376	2655	3840	1461	507	1023	3684	3034	1816	10982	2256	2863	1226	1180	2601	8191	5531	15336	4468	5970	25087	1562	4713	6563	6343	5340	5054	3312	2287	2842	1048	11409	8990	4035	3969	7654
RP11-1136G11.5_ENSG00000258016.1	8	21	2	6	7	4	9	13	3	4	7	2	4	16	3	7	0	1	0	4	2	1	9	20	0	1	5	2	15	1	25	1	11	21	1	4	2	4	2	3	3	5	7	3	13	10	18	6	17
CTD-2530N21.4_ENSG00000254064.1	40	21	39	40	50	44	58	36	103	54	59	106	54	60	37	42	24	1	37	46	26	42	63	5	21	21	13	2	33	53	40	79	12	32	61	15	28	83	25	47	67	97	37	12	53	52	57	37	49
TRNAK37P_ENSG00000244103.1	0	0	0	0	0	0	1	0	0	0	0	0	0	0	1	0	0	0	2	0	0	0	0	2	0	0	0	0	0	0	0	0	0	0	0	0	0	0	0	0	0	0	0	0	0	0	0	0	0
RP11-596D21.1_ENSG00000257831.1	91	126	64	79	84	61	135	127	89	159	191	312	162	249	100	37	20	2	154	59	47	112	61	97	31	43	45	46	93	81	161	32	85	135	64	138	65	85	130	95	389	133	106	57	192	100	159	92	85
RP11-776A13.2_ENSG00000258202.1	0	0	0	0	0	0	0	0	0	0	0	0	0	0	1	0	0	0	0	0	1	0	0	3	0	0	3	0	0	0	0	0	0	0	0	0	0	0	0	0	0	0	0	0	0	0	0	0	0
MIR422A_ENSG00000199156.1	0	0	0	0	0	0	0	0	0	0	0	0	0	0	0	0	0	0	0	0	0	0	0	0	1	0	0	0	0	0	0	0	0	0	0	0	0	0	0	3	0	0	0	0	0	2	0	0	0
CDH12P4_ENSG00000253900.1	95	23	118	65	105	109	77	44	137	120	57	125	99	37	99	26	68	8	136	140	78	81	23	7	29	50	147	9	72	120	15	181	53	30	111	97	28	43	52	94	118	116	137	42	50	99	53	108	47
SERPINB7_ENSG00000166396.8	12	104	7	65	43	251	59	317	15	8	38	28	104	12	4	24	4	2	4	4	6	0	47	62	2	0	93	9	209	408	445	80	64	32	215	6	107	458	85	7	10	11	30	6	127	13	2	9	24
AL117333.2_ENSG00000241110.1	0	0	0	0	0	0	0	0	1	0	0	0	0	0	0	0	0	0	0	0	0	0	0	0	0	0	0	0	0	0	1	0	0	0	0	0	0	0	0	0	0	0	0	0	0	0	0	0	0
KLF1_ENSG00000105610.3	2	7	0	0	2	3	2	7	8	0	0	0	2	2	0	0	0	2	0	0	0	9	6	3	0	7	0	1	0	0	2	5	0	2	0	0	2	0	2	2	0	0	2	0	0	3	2	1	0
CTD-2192J16.17_ENSG00000196826.7	184	213	177	133	159	100	153	182	274	159	207	179	304	113	33	90	71	10	49	166	52	82	139	99	46	36	97	21	217	123	242	154	170	223	33	69	143	80	121	84	117	109	115	36	161	207	136	133	277
RP11-638I2.3_ENSG00000258522.1	108	120	49	52	50	143	156	199	96	74	122	56	94	160	49	56	27	13	48	70	51	49	113	96	26	94	69	63	175	26	206	95	135	147	56	31	166	158	88	35	24	41	48	37	143	95	101	84	101
DNA2_ENSG00000138346.9	167	343	163	113	154	198	548	422	433	138	141	262	246	317	232	121	115	53	161	148	174	153	359	131	168	379	203	121	252	420	169	444	270	173	226	263	291	386	247	198	325	402	124	229	381	365	135	446	232
APBB2_ENSG00000163697.11	3247	4662	1380	4276	3080	3636	2921	1823	3258	3121	4210	3054	2206	5317	1011	2057	734	106	1121	1296	764	1134	1639	755	889	480	829	1201	1946	2366	4724	2476	2621	3994	6299	2128	1303	3143	2845	1891	3828	2099	1956	2061	1831	1847	4151	2810	2639
U6_ENSG00000200345.2	73	50	125	114	71	72	42	24	72	52	41	56	18	37	63	27	75	73	117	90	165	46	40	3	91	51	51	101	53	53	31	52	60	23	65	108	45	53	85	108	64	60	73	90	38	52	38	77	41
VN1R108P_ENSG00000230772.1	16	1	13	7	12	21	13	0	39	2	17	38	7	12	2	6	0	0	21	6	1	3	8	9	1	0	11	2	15	32	5	5	16	20	6	14	15	34	12	11	12	7	7	0	6	6	27	5	13
RP4-728D4.3_ENSG00000236274.1	101	89	68	96	172	94	79	95	95	60	89	104	79	60	116	98	63	6	62	85	138	67	62	42	57	60	91	31	60	118	162	63	74	175	82	77	93	82	79	135	70	71	73	32	96	78	60	83	83
AL583832.1_ENSG00000251696.1	3	0	0	0	1	0	0	0	2	0	1	0	0	0	0	2	0	0	0	0	0	0	0	0	0	0	0	0	0	0	0	0	1	0	0	0	0	0	1	0	0	1	0	0	3	0	0	1	5
TBL3_ENSG00000183751.8	3079	7604	2209	4064	3666	9388	6408	5805	2879	1829	3680	2681	4123	7790	1863	4997	2185	427	1352	6157	4685	1355	5543	1412	975	2718	1527	1091	6458	2822	7424	3364	6899	7413	3630	1938	5884	7715	6140	2033	2376	4071	3793	1847	6976	5531	5237	3621	3952
5S_rRNA_ENSG00000202175.1	0	0	0	0	3	0	1	1	0	0	0	0	1	0	2	0	1	0	0	1	0	1	0	0	0	1	0	0	1	2	0	1	0	0	0	0	0	0	0	2	2	1	1	1	0	0	1	0	0
CPD_ENSG00000108582.5	3280	18697	1434	2413	2324	2195	2988	5019	2433	926	4843	2378	3737	13244	942	710	588	360	886	2439	542	771	1240	1224	363	607	960	187	10032	1852	9417	3052	3485	7516	2174	1875	4922	3737	2613	1164	1442	914	1557	446	6779	5311	3531	2530	4303
AC105941.1_ENSG00000239006.1	1	0	0	0	0	0	0	0	0	0	0	0	0	0	0	0	0	0	0	0	0	0	0	0	0	0	0	0	0	0	0	0	0	0	1	0	0	0	0	0	0	0	0	0	0	0	0	0	0
AL132988.2_ENSG00000240756.1	17	60	43	13	68	17	16	6	4	31	8	61	9	24	22	12	15	30	17	15	3	3	8	49	4	3	1	5	10	10	1	5	11	10	4	17	6	11	18	7	76	6	13	24	4	6	24	11	9
HAUS4_ENSG00000092036.12	1256	2215	745	2050	1452	1967	2774	1772	1484	1081	1642	1317	1583	1406	693	908	705	112	1527	1540	865	1236	1916	974	582	1532	1002	278	2396	1579	3114	1372	1899	2894	1148	1221	2416	2900	2057	1372	1298	1675	1480	806	2621	2178	1626	1805	2390
TMC6_ENSG00000141524.9	5570	16534	5941	9425	17397	7457	10179	7762	5049	5962	4767	14863	11190	19150	3080	10417	3616	1046	7600	14270	11872	2652	30813	2274	6994	7950	1982	3481	8200	7085	28614	12445	14825	9447	7374	10038	13265	19460	15702	14807	7058	16302	9075	9860	10106	8229	6500	10737	14443
RP11-21I10.2_ENSG00000249356.1	47	58	7	6	15	49	28	15	13	9	31	8	47	33	8	12	12	0	12	22	3	2	29	31	4	19	9	5	52	22	34	13	17	85	3	3	8	25	35	22	22	16	13	0	77	25	21	34	44
CD6_ENSG00000013725.10	520	467	251	422	3023	1137	504	1314	1222	1128	584	262	1237	125	449	285	337	161	203	517	601	462	290	182	1434	285	1060	88	872	509	1203	693	3534	696	160	175	495	513	2238	6934	857	407	829	2097	775	500	470	2677	1023
RPL21P44_ENSG00000229585.3	71	52	214	77	118	66	38	91	118	151	52	129	57	20	80	196	51	4	104	174	56	101	36	3	61	28	69	11	65	211	20	58	80	42	161	127	23	72	82	111	127	98	46	61	73	67	42	65	49
AC132872.1_ENSG00000184551.4	1284	3164	725	1536	1132	1517	2123	1690	2449	905	1620	1491	2298	3718	723	1696	738	98	1240	1922	1220	915	3799	814	627	1185	594	1159	1765	1502	2481	1242	1827	1866	2528	2479	1821	3665	2426	1334	1577	1522	2017	753	2336	1178	2260	1948	1780
SNORA73_ENSG00000252531.1	102	99	82	114	136	140	105	92	153	126	102	120	72	169	88	104	63	10	150	239	114	78	81	37	91	144	87	19	78	172	116	211	125	86	140	78	127	84	95	105	88	134	98	33	165	116	73	238	128
NDRG1_ENSG00000104419.9	7435	11266	4268	20031	4124	13398	4990	10692	2260	14556	8962	9710	9417	5848	2116	6984	2147	4479	23192	3621	6371	2482	8641	26279	1081	6693	1962	6494	15132	5024	13834	5486	6967	12329	87250	8120	15002	23176	4637	4390	4671	7630	7169	3552	59721	8778	8618	7884	20842
RP11-560F8.1_ENSG00000251261.2	0	0	0	0	0	0	0	0	0	2	0	0	0	0	0	0	0	0	6	0	0	0	0	1	0	0	0	0	0	0	0	0	1	0	0	0	0	1	0	0	0	0	0	0	0	0	0	0	0
CWC25_ENSG00000108296.4	2296	2438	2567	3056	2344	2008	1881	2082	2274	2658	1847	1789	2246	2723	3394	1386	1565	1491	2778	4425	3570	2648	2019	827	1670	2106	1770	5370	2291	2156	1940	2103	2219	1754	3658	3269	3010	2635	2295	1773	4171	1702	2225	2443	2415	1973	1593	2733	4644
PYGL_ENSG00000100504.11	1584	5276	275	1549	755	2348	9175	1980	3774	1102	1720	2422	431	3012	167	1516	203	61	2120	2554	347	342	376	1221	1368	72	2563	197	733	910	1935	1556	1409	886	7301	1137	585	2139	1399	3442	1411	830	483	737	1267	1407	1895	854	968
CTD-2210A23.1_ENSG00000253654.1	0	0	0	0	0	0	0	0	0	0	0	0	0	0	0	0	0	0	2	0	2	0	0	3	0	0	2	0	0	0	0	0	0	0	0	2	0	0	2	0	2	0	0	0	0	0	0	0	0
ZNF648_ENSG00000179930.5	2	0	2	2	8	11	2	0	2	0	18	11	0	0	46	0	2	6	90	0	47	10	1	4	2	2	17	1	3	0	2	6	3	2	0	2	0	6	6	4	1	0	2	2	0	2	4	4	3
MESTIT1_ENSG00000246011.1	59	22	86	12	23	21	51	43	13	57	83	39	68	78	69	79	49	11	76	60	62	70	57	12	27	48	5	23	80	36	52	84	47	44	28	58	62	42	30	70	68	75	58	27	25	28	29	59	50
RP11-365H8.2_ENSG00000251435.1	5	0	0	1	8	0	0	0	9	1	0	0	0	2	1	0	5	0	0	0	0	0	0	10	0	0	0	0	0	6	0	0	0	0	0	1	0	2	0	0	14	2	0	6	2	4	0	8	5
RP11-403I13.1_ENSG00000226028.2	0	0	1	2	0	3	1	0	1	1	0	7	0	1	0	3	2	0	1	1	0	0	1	2	2	0	1	0	0	3	2	5	1	1	1	4	0	0	0	2	2	1	0	0	0	5	0	0	0
RN7SK_ENSG00000202198.1	80	22	64	119	43	27	181	141	47	246	32	62	74	147	49	45	45	57	266	202	188	272	79	225	16	85	40	112	83	16	29	69	37	20	113	71	146	57	48	23	45	29	46	101	96	74	85	127	115
U6_ENSG00000222282.1	16	11	7	10	21	7	6	7	24	10	26	42	9	11	2	5	6	2	9	12	7	4	20	11	6	9	14	1	8	16	6	7	16	5	6	8	5	8	14	23	11	13	8	3	9	13	25	8	19
PARP12_ENSG00000059378.7	3651	4359	2900	2820	2052	3492	5330	1684	2723	3391	2248	3480	4545	8409	1029	4855	1623	338	1659	6049	2308	620	3688	2522	1081	1935	1062	255	2762	5029	4005	1160	5203	3571	2959	5831	3706	4311	6948	3367	2150	2282	2300	1416	2859	5878	2039	3797	7487
C22orf40_ENSG00000205643.6	473	566	206	453	337	628	352	642	276	302	402	342	223	560	314	225	257	36	174	452	204	219	478	121	209	329	406	159	841	350	734	617	402	768	534	211	306	645	446	471	456	567	390	269	699	206	591	463	645
AC007308.6_ENSG00000234252.1	212	238	156	157	200	239	200	190	158	217	264	207	182	243	123	109	78	14	100	128	143	132	124	59	77	117	180	23	204	219	224	159	151	224	229	125	147	224	166	266	131	284	165	68	243	116	278	178	247
GRPEL2P1_ENSG00000233211.2	0	0	1	10	0	0	0	0	0	4	1	2	0	0	0	2	3	2	0	1	2	0	0	8	0	0	0	0	3	2	1	0	1	0	0	3	2	0	2	0	0	0	0	1	0	0	1	0	0
RP5-1170K4.7_ENSG00000231467.2	21	0	0	6	12	10	3	3	0	0	17	2	0	0	0	3	24	0	0	0	0	3	8	1	1	0	0	0	21	6	18	0	18	18	3	7	9	6	4	30	9	0	11	0	45	3	13	39	12
RP11-10G12.1_ENSG00000244538.1	146	182	47	98	148	111	117	141	86	95	91	89	93	190	33	102	38	10	46	113	25	25	162	122	17	46	39	45	191	57	256	162	215	125	84	9	167	325	64	44	60	34	54	52	162	105	88	157	196
CTD-2308B18.4_ENSG00000248600.1	0	0	0	0	0	2	0	0	0	0	0	0	0	0	1	0	0	0	0	0	0	0	0	0	0	0	0	0	0	0	0	0	0	0	0	0	0	0	0	0	0	0	0	1	0	0	0	0	0
BCMO1_ENSG00000135697.4	115	274	134	113	219	275	382	206	42	51	298	64	354	19	54	106	23	52	155	176	206	42	24	184	72	126	11	19	304	160	376	29	225	142	4	93	232	118	232	129	139	543	320	25	236	524	128	263	380
hsa-mir-1302-2_ENSG00000221311.1	0	1	1	2	6	9	2	1	7	0	1	12	1	1	6	1	0	0	22	7	5	5	0	6	0	2	4	0	1	6	0	3	4	3	6	8	0	2	2	11	2	7	4	1	0	0	5	0	8
TTC7B_ENSG00000165914.8	1740	876	509	1222	653	731	699	344	875	598	2203	428	819	714	463	425	611	69	241	590	261	813	681	349	198	309	1202	893	981	536	1886	751	1312	1461	677	268	443	758	1063	804	738	895	959	802	273	567	4113	1249	802
SLIT2_ENSG00000145147.13	626	1027	194	690	319	681	569	53	10169	782	1235	321	153	41	122	182	146	76	142	74	106	48	972	217	47	9	462	13	174	214	2561	729	716	918	331	158	70	247	420	375	544	624	253	468	88	411	3202	730	725
RP11-40H20.5_ENSG00000229985.2	1	6	1	2	1	1	0	4	1	2	1	0	2	2	1	0	2	2	0	0	2	0	0	2	0	2	0	32	1	0	2	2	10	1	1	1	2	6	1	3	1	1	2	0	4	6	3	10	4
KLRK1_ENSG00000213809.4	458	110	176	150	1197	249	1051	728	741	206	233	542	101	100	321	96	199	32	242	407	164	176	40	59	226	143	232	8	127	467	400	128	909	195	82	359	109	449	435	1459	270	102	150	190	100	286	99	1626	225
CTD-2318H23.1_ENSG00000251371.1	0	0	0	0	0	0	0	0	0	0	0	0	0	0	0	0	1	0	1	0	0	0	0	1	0	0	0	0	0	0	0	0	0	0	0	0	0	0	0	0	0	0	0	0	0	0	0	0	0
AC012506.3_ENSG00000223634.1	0	0	0	0	3	0	0	0	0	0	0	0	4	0	0	0	0	0	1	2	0	0	0	6	0	0	0	0	2	0	0	0	0	0	0	0	0	0	2	0	0	0	0	0	3	1	0	0	0
CETN4P_ENSG00000224786.1	3	1	0	0	2	2	1	0	4	0	3	0	1	0	0	0	5	0	0	0	0	0	0	2	0	0	3	0	0	0	3	0	2	2	2	0	3	0	8	5	0	0	0	0	0	2	0	7	1
RP13-469O16.1_ENSG00000214604.3	0	0	0	2	0	0	0	0	0	0	0	0	0	0	0	0	0	2	1	0	2	0	0	10	0	0	0	0	0	0	0	0	0	0	2	0	0	0	0	0	0	0	0	0	0	0	0	0	0
Y_RNA_ENSG00000201378.1	5	1	10	6	6	4	3	4	3	4	8	6	5	0	5	4	8	0	3	5	6	1	3	7	1	0	3	4	1	2	6	11	7	10	4	8	2	5	6	2	13	9	11	9	4	0	5	6	11
DERA_ENSG00000023697.8	1206	2387	454	484	595	1951	1665	1255	592	493	1012	588	1966	689	180	338	179	106	287	437	220	68	1729	1350	129	1134	269	279	1149	526	1873	613	1083	2526	692	489	1841	1447	817	330	295	309	550	294	1279	1115	996	1053	1667
U6_ENSG00000238882.1	0	0	0	0	0	0	0	0	0	0	0	0	0	0	0	0	0	0	0	0	0	0	0	1	0	0	2	0	0	0	0	0	0	0	0	0	0	0	0	0	0	0	0	0	0	0	0	0	0
TK2_ENSG00000166548.9	1991	4363	1502	2549	1084	3521	3053	2041	3116	1060	2432	1715	3075	2921	555	940	827	196	1075	2331	1258	836	2646	1580	791	537	1856	367	2598	1647	4044	1638	2694	3463	1483	1239	2372	2672	2225	1629	1303	1268	1653	1016	2037	3033	2207	1796	2630
AL034548.2_ENSG00000247315.2	598	638	735	476	452	677	775	1098	735	330	751	521	570	610	1030	325	262	36	416	689	276	349	945	305	221	554	406	145	586	291	1254	692	657	1348	253	192	671	1773	775	339	216	224	475	216	692	439	832	741	766
RP11-477G18.4_ENSG00000250307.1	0	1	0	0	0	0	0	1	0	0	0	0	0	0	0	0	0	2	1	0	0	2	1	0	0	0	0	0	0	0	0	0	0	0	0	0	1	1	0	0	0	0	0	0	0	0	0	0	0
RP11-496I2.2_ENSG00000257310.1	47	46	12	86	9	85	136	17	149	14	25	108	96	11	0	23	8	14	15	5	92	7	30	103	45	8	6	0	10	43	80	77	23	72	52	87	40	27	31	60	28	38	33	12	177	102	70	29	82
RP4-575N6.4_ENSG00000225938.1	28	6	15	3	25	2	12	5	47	6	6	5	3	2	4	20	11	5	5	7	13	104	30	6	17	2	32	82	7	13	8	0	12	19	6	5	10	5	14	22	18	5	13	26	2	10	12	70	9
RP11-316C12.2_ENSG00000227126.1	12	0	2	3	1	3	0	0	2	1	19	2	3	6	6	1	1	0	0	0	0	7	39	2	0	0	0	0	3	0	3	0	5	4	1	1	1	2	5	2	1	7	5	2	0	2	43	5	3
RP11-6B19.3_ENSG00000256627.1	0	0	0	0	2	0	1	0	0	0	0	0	0	0	2	0	0	2	0	0	0	0	0	3	3	0	0	0	0	1	0	0	0	0	0	0	0	0	1	0	0	0	0	0	0	0	0	0	0
RRAS2_ENSG00000133818.8	962	1735	207	552	536	987	1306	948	361	411	837	458	889	1446	270	255	139	65	230	469	166	112	830	1121	166	231	174	223	911	465	1257	644	914	888	595	224	1429	1723	653	208	220	159	358	196	1410	857	1022	506	1088
RP11-367J11.2_ENSG00000245748.1	2093	1664	893	1099	1621	2743	1091	1853	2547	768	1932	1388	1719	1365	817	1674	591	70	751	1370	1149	699	2266	845	540	533	2039	343	1533	1529	2814	1266	1867	3283	1075	1381	1333	2243	1512	2070	2206	1220	1875	997	2937	1915	2619	1987	2018
EIF4B_ENSG00000063046.12	12204	12701	5711	10502	10996	7778	12286	15464	9640	5502	13572	6401	7695	8021	4691	5179	2659	1049	2971	5079	2313	1953	9056	8430	2602	3200	5613	7505	14464	5451	21871	9056	12777	17670	9484	3866	6880	15091	7111	8132	3857	4491	6954	6473	14407	9278	15256	10062	8970
AC009227.3_ENSG00000238004.1	0	0	0	0	0	1	0	0	0	0	0	0	0	0	0	0	0	0	0	0	0	0	0	3	0	0	0	0	0	0	0	0	0	0	2	0	0	0	0	0	0	0	0	0	0	0	0	0	0
MRPL2P1_ENSG00000257480.1	2	0	0	0	2	0	2	0	1	0	4	0	2	1	0	0	0	0	0	2	0	1	4	10	3	2	0	0	0	5	0	0	0	0	0	3	0	0	0	8	1	10	0	0	0	0	0	0	0
AC034187.3_ENSG00000215160.2	3	5	3	1	1	6	17	8	3	6	4	10	8	2	6	38	8	1	6	17	4	10	0	5	8	4	27	1	29	3	4	15	2	4	6	5	3	5	5	4	2	5	7	2	9	3	7	4	7
GLP2R_ENSG00000065325.5	288	403	245	173	338	188	249	52	18	57	761	388	105	6	102	92	104	7	17	81	21	72	1744	50	10	0	36	8	150	384	528	114	295	393	34	269	71	50	333	160	143	288	660	199	4	181	1981	407	434
OIP5_ENSG00000104147.3	40	75	50	75	72	248	346	302	94	54	65	70	120	59	56	99	27	1	60	37	32	64	76	27	30	200	47	29	211	74	143	137	126	172	39	27	162	150	81	40	64	38	51	23	322	193	29	99	112
RP11-652L8.2_ENSG00000255274.3	75	432	131	416	74	70	178	134	44	464	111	135	354	161	51	92	57	12	186	175	167	94	318	218	70	89	1	99	413	123	535	38	165	206	158	381	351	506	219	72	58	101	157	39	391	333	58	64	333
DISC1-IT1_ENSG00000226758.1	34	15	33	61	27	13	12	6	50	57	18	58	35	47	34	22	74	23	40	79	41	51	34	18	32	8	145	315	18	35	15	12	41	8	26	35	30	15	49	19	17	30	32	46	4	16	16	45	36
BRDT_ENSG00000137948.13	13	0	2	5	5	1	4	3	3	6	2	6	9	5	6	6	2	9	17	1	3	1	0	52	12	2	259	7	0	4	2	10	8	2	4	8	17	3	12	1	1	3	4	7	45	0	6	6	2
RBM22P2_ENSG00000213411.2	152	30	193	64	145	128	63	20	113	89	113	123	72	8	229	34	183	61	101	96	241	165	34	16	74	39	226	59	21	358	54	144	75	55	163	104	42	18	110	682	338	230	153	153	14	87	74	127	57
CTC-498M16.3_ENSG00000250306.1	0	0	1	1	0	6	3	1	3	2	4	7	2	1	2	2	0	0	4	2	1	6	4	1	0	0	0	0	2	0	2	0	3	0	2	1	0	2	0	0	0	0	0	2	0	2	1	0	4
RP4-745K6.1_ENSG00000227743.1	0	0	0	0	0	0	0	0	0	2	1	0	0	0	0	0	0	0	0	0	0	0	0	0	1	0	0	0	0	0	0	0	0	0	0	0	0	0	0	0	0	0	0	0	0	0	0	0	0
SLC2A2_ENSG00000163581.9	133	41	110	10	184	18	76	19	21	4	467	82	7	5	22	0	70	5	3	20	7	3	24	52	0	4	39	3	118	103	40	19	33	1214	7	33	2	12	130	42	247	5	61	25	25	149	91	85	119
RARRES1_ENSG00000118849.5	1052	1357	264	412	646	9505	1268	4294	1443	352	1723	2495	386	476	135	1468	106	29	146	536	203	65	1161	629	99	60	253	7	296	620	1593	1483	1204	790	61	457	298	184	961	383	369	266	349	256	178	506	840	902	1916
snoU13_ENSG00000238556.1	92	58	49	58	57	121	66	44	77	60	69	64	113	94	47	44	44	26	51	78	68	28	28	24	33	28	25	32	79	88	50	60	88	31	28	57	51	40	51	81	65	73	42	34	47	81	40	73	60
ATP8A2P2_ENSG00000229800.1	98	22	50	20	128	24	52	71	163	47	119	154	52	30	57	15	34	13	32	22	19	151	34	12	19	31	100	19	20	76	7	20	45	62	54	28	15	48	29	49	31	25	39	46	28	24	45	49	100
LRRC56_ENSG00000161328.10	668	1511	560	1488	1180	1044	2209	276	845	809	1603	1346	4691	1662	1614	1223	870	233	1078	5166	745	1474	2029	461	590	463	486	619	2721	1712	1245	2748	2369	1220	1024	1899	1921	2077	3928	1148	2278	1554	2726	843	2234	2605	1061	2024	2721
AC090204.9_ENSG00000243610.1	2	4	2	0	3	0	1	1	1	1	0	3	1	0	4	0	1	1	0	0	0	0	5	1	0	0	0	0	11	2	0	2	2	0	3	2	2	11	2	0	0	0	0	1	3	4	0	2	2
RP11-493L12.6_ENSG00000258116.1	7	11	0	12	2	2	47	3	0	3	2	0	100	16	12	8	0	0	135	62	16	2	0	1	0	3	8	0	0	21	0	0	19	4	51	84	1	11	31	1	41	0	0	4	7	19	2	27	0
MIR181D_ENSG00000207585.1	0	0	0	1	1	2	0	0	1	0	0	8	0	0	1	0	0	0	1	5	1	0	2	1	1	0	0	0	0	0	0	0	1	0	2	0	0	0	0	0	0	0	0	1	0	0	3	0	0
SPINK7_ENSG00000145879.5	9	9	3	3	4	8	8	18	23	11	29	27	9	0	4	6	3	4	0	24	0	0	8	0	0	0	0	0	33	0	11	2	14	18	3	5	8	12	3	0	16	30	5	0	26	3	11	4	6
ZNF347_ENSG00000197937.5	405	299	289	346	356	550	898	469	676	461	688	743	508	580	263	159	175	216	27	228	462	21	536	78	56	15	429	9	131	444	472	125	457	655	92	328	255	463	341	208	483	206	150	241	697	495	469	279	337
RP11-675F6.4_ENSG00000254100.1	37	0	6	1	45	11	10	0	60	6	13	10	1	0	12	2	46	1	4	12	2	13	7	2	0	4	12	5	11	23	4	106	4	27	0	33	2	3	12	58	50	1	11	21	0	2	9	12	13
RP11-106A1.3_ENSG00000229057.1	0	1	3	9	17	3	4	0	0	9	4	7	2	0	321	2	5	0	2	3	3	0	13	1	18	0	57	30	3	38	1	116	41	1	2	2	4	14	7	28	9	0	3	8	1	4	4	2	0
CHCHD2P4_ENSG00000213118.3	2	0	1	0	0	0	0	0	0	0	0	1	0	0	0	0	0	0	0	0	0	0	0	0	0	0	0	0	0	0	0	0	0	0	0	0	0	0	0	0	1	0	0	0	0	0	0	0	0
ARRB1_ENSG00000137486.12	1988	2171	781	1199	1689	2214	1768	3807	2378	1452	2290	788	2249	662	769	1044	549	211	288	1905	1302	835	2300	1612	364	2135	598	852	2545	1489	2526	575	2412	2863	449	711	3649	1718	1406	1448	1171	1831	2495	965	4054	1820	4907	2133	2443
SHANK3_ENSG00000251322.2	9154	8130	2716	3086	4320	2056	3755	2072	3211	2652	4761	2772	3079	3038	1847	2095	4253	111	1427	1050	1858	2102	7485	496	2602	824	3174	765	2823	5781	6204	1854	6946	7024	2289	2226	1564	2811	5986	6162	9022	11480	8829	10946	2887	1048	11118	16932	5998
JOSD1_ENSG00000100221.6	2735	5729	1761	2570	2021	4157	3208	3677	1750	2317	2836	1761	3142	4525	968	1583	757	109	553	1745	679	933	3814	2720	979	1638	1092	1533	4097	2577	5693	1813	2982	5853	3080	1301	3636	2902	2784	2172	2951	2459	1980	1253	4173	2199	3202	2404	3872
U6_ENSG00000252795.1	2	0	6	1	4	0	3	1	0	2	0	1	0	0	1	0	2	0	0	2	0	2	1	0	0	0	0	1	1	3	2	0	0	1	0	4	0	0	3	2	1	4	0	0	0	2	4	1	0
IHH_ENSG00000163501.5	420	806	241	980	716	17	78	1797	122	777	281	153	2409	13	883	394	147	163	61	3114	2903	77	1383	134	17	1540	33	60	7647	600	1599	393	449	1044	21	220	10403	899	1790	242	364	873	1112	79	4007	2852	795	754	6075
NEDD8-MDP1_ENSG00000255526.1	1099	1836	451	762	789	964	1983	1684	921	597	791	792	1053	1049	269	825	284	52	464	1527	259	320	2102	635	171	488	699	297	2314	688	1663	731	1187	1488	846	327	1657	1799	1113	483	391	386	484	329	1594	1736	966	1089	1196
GTF2IRD2_ENSG00000196275.9	4086	2858	5360	3449	4732	4723	5781	1564	3899	3985	4612	6157	5687	2485	5063	4642	3622	332	3361	7403	6713	7463	2840	651	2441	2263	2571	382	3220	6245	3158	5125	4020	3580	2708	5328	3270	3618	3866	5726	8401	5601	3486	2338	2958	3575	3801	3695	5474
AC079145.4_ENSG00000227210.1	26	43	11	43	19	23	23	0	10	41	38	29	23	65	15	5	11	3	14	35	9	9	46	3	12	0	96	0	5	11	262	21	23	26	12	12	43	21	29	10	20	5	15	7	11	41	48	15	54
RP11-222A5.1_ENSG00000224718.1	1	0	0	0	2	0	0	1	0	0	0	0	3	0	0	0	0	0	0	0	0	4	0	4	0	0	0	0	0	0	0	0	0	0	0	0	0	0	0	0	0	0	0	0	0	0	0	0	0
RPL12P3_ENSG00000233106.1	0	0	0	0	0	0	3	0	0	0	1	0	0	0	2	0	0	2	0	0	2	0	0	3	0	0	1	0	0	0	0	6	0	0	0	1	0	0	0	0	0	4	0	0	0	0	0	0	0
LIPE_ENSG00000079435.4	1446	1286	544	792	1320	1119	1060	1659	684	827	976	1067	1340	3064	309	1092	467	58	593	1579	868	679	1312	505	612	490	449	52	1430	665	1751	556	1555	1003	228	577	1162	808	947	821	756	727	685	324	2406	1124	1320	615	1982
RP11-489M13.2_ENSG00000248669.1	1	0	1	0	1	0	2	0	0	0	1	0	0	0	0	1	0	0	0	2	0	0	0	0	0	0	0	0	0	2	0	0	0	1	0	2	0	2	1	2	1	1	0	0	0	1	0	0	0
KIAA0196_ENSG00000164961.10	2136	4417	892	831	1400	1613	4518	1499	1264	978	2291	1227	1823	3292	720	902	351	204	439	711	580	384	1981	2135	351	740	938	605	2006	1013	3475	801	1697	3032	1245	823	940	3469	1347	947	878	1111	957	797	2168	1241	2470	1626	1839
AC007000.10_ENSG00000225726.1	59	55	99	100	130	93	215	72	93	89	103	285	135	51	125	108	74	23	184	110	180	142	52	5	46	41	88	22	67	199	48	80	71	33	55	135	97	76	101	85	188	201	73	57	44	70	46	99	72
NKPD1_ENSG00000179846.6	19	108	43	53	86	257	568	34	70	36	97	102	336	28	338	166	33	12	306	153	130	191	81	25	54	57	48	13	93	72	22	210	198	33	210	146	157	198	91	57	74	229	82	112	569	90	95	43	273
EIF4E2P1_ENSG00000213384.2	36	6	17	8	13	13	8	19	15	31	26	20	12	9	19	12	6	0	14	6	10	11	4	6	7	4	1	10	12	6	7	3	8	9	3	12	16	15	11	6	3	9	10	0	4	4	7	9	8
AC006293.3_ENSG00000170858.5	31	1	4	1	49	9	26	16	35	2	8	2	18	3	12	4	5	1	2	19	13	1	1	21	20	12	1	0	13	28	4	8	18	6	8	9	11	13	18	47	13	5	11	6	5	2	0	48	17
RP11-461F16.4_ENSG00000257445.1	21	4	10	24	20	5	7	3	6	17	35	5	5	4	4	4	2	1	31	23	0	3	8	10	9	5	19	4	7	14	7	20	9	5	2	7	7	2	5	14	1	11	6	10	2	2	33	25	6
APOA1BP_ENSG00000163382.6	2146	4473	1201	1700	1581	4904	2335	6289	1599	922	2689	985	2887	5095	769	2366	874	260	557	3983	518	1317	13513	1888	580	2032	1504	2289	5041	1270	7087	4065	4446	4810	1693	487	3929	5227	2490	1096	836	1809	1525	449	6594	2414	3215	2741	3079
RP11-889D3.2_ENSG00000243572.1	0	0	0	0	1	0	0	0	0	0	0	0	0	0	0	0	0	0	1	0	0	0	0	0	0	0	0	0	0	0	0	0	0	0	0	0	0	0	1	1	3	0	0	0	0	0	1	1	0
CRTAM_ENSG00000109943.4	36	8	4	9	105	21	18	154	79	8	10	6	49	2	6	7	10	6	7	11	12	2	5	30	12	2	34	2	33	33	28	44	209	14	14	9	33	4	50	122	5	0	11	14	23	12	23	142	26
AC135457.1_ENSG00000228672.2	227	1094	429	345	592	321	687	77	645	241	1399	763	2170	335	215	984	98	11	354	319	189	158	1231	176	112	89	62	148	275	538	794	949	743	400	275	414	2205	950	955	391	535	732	399	181	152	401	634	374	1536
CTD-2089N3.1_ENSG00000250360.1	27	1	12	4	2	6	2	0	0	2	10	8	0	0	1	5	14	0	0	2	3	0	3	0	0	0	3	0	16	2	24	2	11	3	0	2	1	3	2	17	13	4	17	11	5	7	5	35	3
ITGAX_ENSG00000140678.10	3854	1791	1468	3625	1939	3090	2416	1153	3216	4283	2997	2692	10280	693	458	3276	2676	116	1428	6068	2438	674	675	255	2295	568	3159	75	835	6736	2476	1501	7997	1388	1903	2288	3463	2464	7042	8293	1802	2699	6236	1045	2028	1997	2469	4703	4354
RP11-438P9.2_ENSG00000227350.1	3	0	1	0	0	0	3	0	1	2	2	2	1	0	0	1	0	5	0	0	0	2	0	3	0	0	0	0	0	5	2	0	2	0	0	1	1	0	0	0	2	1	2	0	2	1	0	0	1
NCRNA00261_ENSG00000225074.2	851	94	346	67	453	47	164	23	69	131	1064	256	179	226	336	19	600	16	42	103	277	106	139	301	49	14	81	50	770	172	417	751	736	1443	5	361	114	126	186	296	1133	57	518	102	17	342	645	627	309
YBX1P4_ENSG00000213188.3	15	24	64	25	57	28	36	48	17	16	37	48	42	13	199	30	24	8	31	51	79	128	17	1	36	47	40	14	34	55	13	27	26	20	6	19	31	34	35	36	32	114	34	38	24	14	25	29	23
RP11-215P8.4_ENSG00000250564.1	2	1	1	0	0	0	3	0	2	0	4	0	0	0	0	1	2	0	2	6	25	410	0	4	0	2	0	0	0	3	0	1	0	1	4	1	0	5	4	4	3	0	0	0	0	0	3	1	0
ZW10_ENSG00000086827.4	548	1045	246	235	443	790	640	756	492	296	677	398	604	868	292	255	122	41	178	232	194	127	518	850	144	251	314	199	637	426	1052	275	716	851	308	223	666	989	404	296	242	320	306	164	673	592	633	439	490
ASCL2_ENSG00000183734.4	56	7	31	16	89	69	26	52	94	4	175	33	24	11	933	32	102	5	20	18	41	195	27	16	5	2192	667	355	183	30	58	27	172	27	4	6	17	36	46	27	68	35	46	16	10	21	25	229	74
RP11-125N22.4_ENSG00000257794.1	2	1	2	3	0	0	2	1	0	2	1	0	1	1	5	2	1	0	0	2	1	2	0	7	0	2	0	0	1	0	0	4	1	0	1	1	3	0	0	0	2	1	1	0	1	3	3	5	1
HMGCLL1_ENSG00000146151.8	555	1	143	26	22	30	10	0	1	4	181	61	0	0	2	15	118	2	1	12	12	0	26	20	0	0	100	0	443	35	109	0	253	83	4	16	6	30	32	166	72	4	145	17	0	73	88	353	86
Y_RNA_ENSG00000201800.1	14	11	8	3	13	14	12	22	18	17	22	9	20	13	10	4	5	2	4	14	14	6	11	22	5	9	18	8	10	7	13	4	11	19	6	3	29	14	8	6	1	6	6	3	11	4	9	22	11
RP11-760D2.4_ENSG00000223740.1	0	2	0	2	0	0	0	0	0	0	2	0	0	0	2	0	0	2	6	0	0	0	0	2	2	0	0	0	2	0	0	0	0	0	1	3	0	0	0	4	5	2	0	2	2	2	0	0	0
RP11-109N23.5_ENSG00000258448.1	36	23	25	31	25	55	58	38	28	30	46	60	27	30	33	15	12	1	24	54	31	28	22	17	25	45	10	30	31	22	46	21	33	33	33	20	36	35	39	16	13	35	22	4	31	30	18	23	28
RP11-142L1.3_ENSG00000240404.1	10	16	7	31	10	8	12	4	6	11	20	14	3	11	12	6	5	6	18	9	24	30	9	7	2	8	22	12	10	5	13	6	14	16	26	13	12	18	3	2	3	3	12	4	7	8	10	10	7
TPM3P3_ENSG00000254195.1	2	0	0	0	0	0	0	0	0	0	0	0	0	0	1	0	0	0	0	0	0	0	0	14	0	0	0	0	1	0	0	2	0	0	0	0	0	0	0	0	0	0	0	0	0	0	0	0	0
CITF22-24E5.1_ENSG00000234979.1	1	0	0	0	0	2	0	0	1	0	0	0	0	0	65	0	0	0	0	0	0	0	0	0	0	0	12	0	0	1	0	0	3	0	0	0	2	0	0	0	0	0	1	0	0	0	0	0	0
HPDL_ENSG00000186603.4	181	171	107	68	247	122	429	748	74	87	100	119	139	90	280	114	37	22	110	209	267	151	88	429	175	329	24	40	1937	122	154	97	121	203	18	66	440	47	175	124	67	215	405	11	1491	308	119	93	432
U73167.7_ENSG00000232352.1	30	51	16	54	23	48	76	51	20	18	43	57	22	31	19	30	44	2	7	31	8	45	87	26	23	9	18	10	63	73	26	90	23	49	14	50	29	45	52	24	81	68	52	34	44	43	51	39	88
DFNB59_ENSG00000204311.6	201	93	182	300	192	344	335	69	188	152	217	554	127	200	268	88	92	11	136	418	123	170	109	26	85	46	428	58	178	292	150	267	197	81	235	150	77	72	227	145	257	132	180	134	42	126	123	236	154
AC021188.4_ENSG00000230747.1	2	3	2	4	19	46	7	12	87	3	5	9	5	5	5	4	2	7	2	2	3	1	3	7	1	3	4	2	1	4	3	12	16	3	2	2	5	0	4	23	7	0	5	5	4	1	9	20	2
MUC16_ENSG00000181143.8	344	59665	1431	3785	2784	7350	51572	183	52	2567	2792	175856	52	10	2183	13679	1213	611	16498	410	3286	13	449	573	5	4	371	22	74	3627	7062	94	92	557	24371	15681	332	35250	16963	4574	1892	383	9337	847	381	36785	3647	600	5459
TRAV41_ENSG00000211820.1	0	0	0	6	2	0	1	1	13	1	2	0	0	0	0	0	0	0	4	0	0	2	0	0	0	0	1	0	0	0	1	0	6	0	0	0	1	3	3	8	1	0	0	0	0	0	0	10	0
MSMB_ENSG00000138294.9	245	280	159	203	266	356	595	248	363	76	196	235	316	209	315	258	133	36	342	38	260	187	3457	96	5035	151	121	1232	430	376	273	171	149	145	264	434	1959	229	267	439	764	817	588	218	1304	698	342	193	555
RP11-162D16.2_ENSG00000227355.1	3	1	0	0	6	0	1	0	4	0	5	0	3	0	0	1	2	0	1	3	1	5	0	9	0	0	1	0	0	3	0	6	0	0	3	0	0	1	1	2	0	0	0	0	0	6	1	0	4
U4atac_ENSG00000253035.1	2	0	1	0	0	0	0	0	0	0	0	0	0	0	0	0	1	0	0	0	1	0	0	0	0	0	0	0	0	1	0	0	0	0	1	0	0	0	0	0	0	0	0	0	0	0	0	0	0
QKI_ENSG00000112531.12	3768	2395	974	2444	1461	1677	3103	490	5455	4202	4197	1602	1923	3712	639	613	475	171	598	804	497	268	1222	1177	348	90	2036	385	922	1266	4879	2702	3437	3293	2651	1011	1297	2020	2444	1385	993	1084	1247	1785	502	1374	5493	3463	2494
ZNF355P_ENSG00000168122.4	132	421	565	477	131	21	532	22	42	638	345	698	167	544	164	2372	11	8	38	345	12	82	241	33	208	85	20	26	215	473	243	12	392	333	325	1668	8	394	468	60	195	1466	329	36	257	525	121	172	467
U7_ENSG00000238759.1	0	0	0	1	0	0	0	0	0	0	0	0	0	0	0	0	0	0	0	0	0	0	0	1	0	0	0	0	0	0	0	0	0	0	0	0	0	0	0	0	0	0	0	0	0	0	0	0	0
RP11-378A12.1_ENSG00000249694.2	3	3	0	0	4	0	1	0	2	0	0	0	0	0	0	1	0	1	0	4	0	0	1	5	0	3	2	0	2	2	0	0	5	0	2	1	3	0	0	5	0	0	0	0	2	0	0	0	7
GALP_ENSG00000197487.3	0	0	0	0	2	0	0	0	0	0	1	0	0	1	0	1	0	0	3	2	0	0	0	9	0	0	0	3	0	1	0	1	1	0	2	0	0	0	0	0	0	1	0	0	0	0	0	0	0
OLIG2_ENSG00000205927.4	0	0	0	0	0	0	0	0	4	0	4	6	10	0	0	0	4	0	16	0	4	0	4	8	0	0	0	0	0	0	8	4	4	0	0	8	4	0	0	0	0	0	0	4	8	0	0	16	60
DCAF12_ENSG00000198876.7	1716	2743	614	1449	831	1246	1487	2428	1893	730	2195	711	1174	1162	520	539	291	71	270	809	313	423	2907	3207	354	572	1360	1122	2558	1309	2892	1192	1899	2490	1329	732	1188	1508	1114	862	1647	632	1377	830	1613	3550	1775	1476	1267
CTD-2201E18.2_ENSG00000249516.1	0	11	0	0	10	5	21	3	11	7	5	4	37	0	4	0	2	0	4	4	9	0	0	5	1	4	0	0	0	27	4	0	13	0	3	2	0	8	6	17	4	42	0	2	0	2	0	10	1
AC104472.1_ENSG00000214919.2	6	5	26	8	15	2	6	30	3	8	11	10	17	1	14	11	9	1	35	3	32	7	6	5	7	9	0	3	6	5	3	16	11	3	1	13	11	2	7	3	19	30	10	4	34	13	9	12	14
C12orf57_ENSG00000111678.5	1031	803	763	831	1051	1726	1186	713	1551	513	714	618	435	657	142	491	380	84	413	1930	274	160	1829	267	130	846	571	309	1186	391	1571	1630	1362	1418	968	201	1113	1139	755	420	373	244	455	306	1053	891	952	1412	1035
C2orf70_ENSG00000173557.10	180	220	231	196	302	196	183	151	100	229	335	76	323	230	815	403	123	19	248	877	404	624	177	136	158	19	61	226	464	97	565	581	874	118	15	106	938	117	216	279	221	1481	671	89	215	837	279	167	533
LYRM2_ENSG00000083099.6	2269	1339	1398	1077	1940	1217	1484	1788	1495	1185	2109	1348	2602	1870	737	729	690	100	762	1013	445	423	1301	754	504	933	1436	629	1957	975	2980	1578	2604	2336	914	780	1388	1459	1381	1085	1064	1014	1134	749	1353	1317	2030	1906	1633
ZDHHC14_ENSG00000175048.11	1302	753	2018	722	1537	373	1323	844	1623	962	1616	661	2486	1157	986	693	923	160	543	1037	1465	880	1633	120	665	107	818	446	635	944	2262	675	1554	1347	350	2539	1537	645	1668	1754	1147	1127	1652	734	1876	1953	1349	1873	2096
PDZD8_ENSG00000165650.7	1839	2134	831	1121	1301	770	1195	2119	1032	965	2172	839	3923	1975	976	1196	431	158	580	1171	983	810	1750	727	280	2201	825	689	2847	1289	4089	2298	2543	3002	562	793	4243	1685	1511	790	511	865	1029	262	2018	2063	1629	1866	1683
HMGB1P26_ENSG00000225984.1	37	28	30	18	41	29	23	35	17	39	15	29	17	16	11	28	17	13	14	50	28	17	11	19	10	41	13	16	43	18	26	50	39	21	14	11	36	10	24	14	9	11	21	8	35	38	8	31	30
IGLV3-21_ENSG00000211662.2	12	4	75	49	135	43	0	36	211	140	19	35	39	6	0	10	9	17	27	114	97	17	38	9	25	64	8	3	45	11	208	1	144	60	9	3	234	6	198	88	20	16	103	4	325	56	61	1345	511
VENTXP5_ENSG00000253569.1	0	0	0	0	0	1	0	0	1	0	1	0	0	0	0	0	0	0	0	0	0	1	0	6	0	0	0	0	0	1	0	0	0	1	0	0	1	0	0	0	0	1	1	0	0	0	0	0	0
VSIG10_ENSG00000176834.9	1575	4758	1676	1509	1373	1110	1989	2366	1565	1379	2027	2092	1933	1283	1673	1981	921	169	895	2336	2718	723	2802	737	956	1874	1321	220	2683	2175	3089	1919	2301	2526	389	1510	1699	2466	2157	564	1395	2123	1262	823	2961	1219	1026	1746	2675
ASS1P10_ENSG00000215325.4	13	45	51	17	19	23	32	49	18	55	26	68	41	6	16	23	12	0	16	15	32	2	8	15	12	27	37	1	13	63	26	15	29	24	39	26	15	19	9	19	34	12	19	7	10	17	11	27	47
PSMB3P2_ENSG00000235444.2	0	2	0	0	1	2	1	0	4	0	0	0	0	0	0	0	0	2	3	0	0	0	0	3	0	1	0	0	1	0	0	0	0	0	9	2	1	1	0	0	0	0	0	0	2	0	0	0	0
AL355999.1_ENSG00000247330.1	18	29	17	27	25	43	30	22	43	20	34	39	18	45	28	10	9	6	19	41	34	28	26	25	22	12	31	25	13	19	49	50	28	27	28	17	25	26	10	22	19	15	22	13	17	18	34	14	12
LPAR2_ENSG00000064547.8	1645	4419	1614	2842	4749	1845	2590	3062	2056	1918	2217	2617	3506	2774	2780	1492	1064	175	1071	3970	2447	1953	2593	502	4668	1055	1361	1133	3864	2815	3094	3238	4018	2184	1853	3474	1992	1633	3887	3623	3338	3445	7005	2263	5026	4308	1557	2551	4461
RP11-512C24.2_ENSG00000226240.1	2	0	2	0	0	2	2	0	0	1	0	0	4	0	3	1	0	0	2	0	0	0	1	7	0	0	0	0	0	2	0	2	3	0	1	0	2	0	0	4	1	0	0	1	0	0	0	0	0
RN5S5_ENSG00000199396.1	27	11	15	33	49	108	56	1	22	339	40	20	32	194	18	75	43	38	102	511	45	8	40	26	14	47	2	6	19	104	6	138	23	10	79	27	101	39	657	24	31	59	13	16	4	3	41	12	51
OR2V1_ENSG00000185372.2	0	0	2	1	0	0	2	0	0	0	0	0	0	0	1	0	0	0	0	2	2	0	0	5	0	0	0	0	0	4	1	0	0	0	0	0	0	0	0	0	0	1	0	2	0	0	0	0	0
MCM8_ENSG00000125885.8	612	1048	355	392	672	1144	1625	794	1819	378	481	827	518	1519	540	220	162	49	955	1365	370	330	484	502	216	818	759	267	828	520	907	575	449	1506	736	797	529	1339	793	592	437	511	524	326	766	506	514	900	530
RP11-698N11.3_ENSG00000186082.9	18	37	11	5	13	4	28	43	17	5	12	11	37	15	1	36	7	0	3	15	2	2	21	22	9	7	0	5	30	6	37	10	24	56	0	8	39	42	19	14	5	7	13	2	39	10	5	29	36
NFIB_ENSG00000147862.9	6567	3502	2863	2091	3540	3642	3809	6081	12602	2503	6978	2303	3542	4293	3251	1233	1436	153	499	1275	1508	116	3810	2639	577	1311	2617	3514	7262	3302	4750	8921	2690	9822	799	1457	2721	3304	3562	1765	3347	2526	2469	2063	2748	3069	8218	4091	4075
AL353662.1_ENSG00000203511.3	53	83	26	41	33	48	52	39	124	89	92	35	40	74	34	41	14	6	32	16	42	34	124	91	30	29	30	53	48	78	121	40	45	70	64	61	41	42	41	15	18	16	29	29	47	33	85	62	27
ST13P13_ENSG00000229256.1	86	120	28	74	53	126	72	73	43	39	108	37	34	87	10	19	32	4	8	30	8	16	44	39	7	51	46	36	85	28	100	61	64	119	67	16	63	60	57	39	13	36	46	34	67	50	84	97	98
RP11-44K6.2_ENSG00000253838.1	2	0	0	4	2	5	23	8	3	0	2	3	6	2	7	0	3	2	2	0	1	0	0	6	0	2	13	0	5	0	0	9	5	0	2	1	4	2	6	5	1	1	2	2	2	5	7	274	5
RP11-274B21.5_ENSG00000241493.1	2	3	6	0	7	3	7	17	12	5	14	5	6	0	7	10	1	0	3	1	0	18	11	7	0	3	7	0	0	21	1	3	2	3	8	3	1	9	10	4	3	9	0	4	2	3	5	0	5
RPL12P18_ENSG00000213400.3	2	7	1	3	0	1	5	0	0	2	0	0	2	0	0	2	0	0	0	11	5	1	4	4	0	30	4	0	8	0	9	1	11	10	0	0	3	8	2	1	0	0	3	0	2	0	2	11	5
RP4-813D12.2_ENSG00000235032.1	12	8	2	24	64	25	20	2	0	15	23	0	18	0	26	8	0	3	20	4	3	26	6	0	0	41	103	17	3	3	56	4	3	4	11	2	17	89	1	4	0	13	8	8	0	29	35	10	160
C9orf29_ENSG00000204173.5	2	4	10	5	6	2	10	6	4	6	6	13	5	9	1	3	3	2	8	2	6	3	4	22	1	1	8	5	5	1	3	13	3	3	1	2	9	10	2	0	2	6	0	2	9	11	4	2	4
RP11-44F21.2_ENSG00000248165.1	114	50	51	32	49	28	39	10	18	28	72	20	65	11	22	40	26	3	9	35	2	32	21	153	16	0	104	59	100	35	189	33	107	157	19	39	5	37	29	107	23	10	87	12	31	146	67	114	28
AL355574.1_ENSG00000251337.1	345	822	107	169	194	805	440	484	401	186	1960	201	485	508	331	242	83	7	50	130	39	94	1380	292	105	109	149	300	254	425	660	305	556	641	270	180	171	573	280	239	271	752	280	111	442	309	5319	339	470
NPAT_ENSG00000149308.10	1460	1417	945	849	1144	1339	1248	934	2007	1262	1281	1069	1456	1867	1507	604	470	232	664	960	942	510	924	774	910	934	1014	1196	1722	767	2213	1223	1857	1590	981	796	1571	2795	1143	1379	1035	755	948	614	1205	1185	1084	1250	1018
PTPRD_ENSG00000153707.9	604	174	155	378	248	249	195	17	154	159	695	241	85	7	46	47	160	9	48	17	75	19	240	122	40	1272	38	14	158	118	903	732	174	1046	181	167	41	160	108	249	251	175	201	145	50	170	746	164	354
RP5-837O21.8_ENSG00000250890.1	0	0	0	0	1	4	7	0	1	2	1	1	1	0	3	0	0	0	1	2	0	0	2	1	0	0	2	0	0	1	1	0	0	2	0	4	0	2	0	3	0	0	0	0	0	0	0	0	0
C17orf65_ENSG00000168597.4	635	824	452	607	918	511	879	584	1039	334	1402	1442	1924	1182	476	542	445	33	1036	1201	714	582	943	66	383	596	642	49	801	1004	784	1304	885	636	396	1247	468	1208	1003	1212	1430	1755	692	449	857	795	989	857	999
COL16A1_ENSG00000084636.11	16816	24114	10912	56811	12749	116483	18569	1078	8750	16079	29766	26183	13795	4772	10619	45641	7980	583	13305	23465	20517	3363	32525	1168	10623	4111	7274	5137	4908	25275	70606	49581	16924	11100	46062	12863	7618	18550	19820	22070	23627	40590	25639	10718	11475	12492	58860	22278	31454
U4_ENSG00000252237.1	40	36	45	39	25	48	41	36	38	26	36	25	67	34	28	16	20	23	24	55	51	65	28	14	13	48	23	39	42	20	38	35	40	25	54	15	32	37	20	16	19	20	28	24	4	31	25	41	31
RSL24D1P8_ENSG00000237273.1	7	4	2	5	3	3	11	8	9	4	6	8	8	4	5	6	1	1	5	0	2	0	4	9	0	2	4	0	3	15	4	1	2	3	1	2	3	5	8	6	6	5	4	5	7	13	4	6	9
PHLDA3_ENSG00000174307.5	4044	9932	1922	9017	3582	10942	4197	5484	2345	3893	8487	4762	4395	19535	950	3923	1047	188	3551	6290	1646	631	14351	2040	1684	804	582	2023	5787	2281	20101	11252	6796	4959	8731	1952	6132	12297	5742	1808	2536	3171	3761	4111	4208	6765	10972	3181	8544
RP11-363L24.3_ENSG00000253961.1	61	32	46	31	51	41	34	39	48	40	38	52	23	92	34	49	20	6	34	27	42	19	35	14	21	21	20	12	45	42	76	53	29	76	48	32	31	101	60	49	32	57	36	17	65	54	37	89	32
RP11-563N12.2_ENSG00000253164.1	0	0	0	0	4	0	0	0	0	0	0	0	0	0	0	0	3	0	0	0	0	0	0	6	0	0	0	0	0	0	1	36	0	0	4	0	0	0	0	0	0	1	0	0	0	0	0	2	1
SQRDL_ENSG00000137767.8	2061	3623	720	1414	1743	3603	2963	5012	930	890	2195	1085	3566	3056	580	758	334	241	207	725	378	233	4380	2985	411	1536	802	434	4418	1105	6016	1389	4906	5925	1329	453	5205	6189	2971	616	485	618	1507	576	4357	3878	1976	2667	3215
FGF17_ENSG00000158815.6	159	34	111	170	140	70	59	13	91	57	116	135	259	100	137	63	359	16	254	585	27	265	146	5	23	19	880	7	166	278	87	239	66	72	37	163	56	72	232	432	660	492	217	183	225	226	167	168	165
RP11-864I4.4_ENSG00000257058.1	10	37	16	20	17	47	31	45	11	18	25	27	42	81	5	35	7	2	11	15	12	10	73	9	1	18	7	6	20	16	17	16	17	31	64	18	44	68	22	7	6	12	14	7	51	14	49	29	41
C1orf96_ENSG00000154429.6	533	364	705	280	803	560	426	986	619	342	479	386	604	431	1001	247	253	104	501	511	616	656	390	283	196	439	447	293	423	580	525	907	702	463	325	400	486	468	454	644	574	882	331	360	489	439	430	616	479
ETV5-AS1_ENSG00000234197.1	6	12	20	8	17	15	8	5	38	8	35	13	22	9	13	16	2	1	1	2	1	14	11	5	3	4	51	3	4	12	31	16	12	34	2	13	21	11	8	26	17	39	12	9	49	13	23	13	7
RP5-991B18.1_ENSG00000229963.1	0	0	0	1	0	0	0	0	0	0	0	0	2	0	0	0	0	0	0	0	0	0	0	0	0	0	0	0	0	0	0	0	1	0	0	2	1	0	0	2	0	0	0	0	0	0	0	0	0
PRR18_ENSG00000176381.4	58	0	18	8	28	5	26	3	2	0	73	5	6	0	0	2	48	2	2	14	0	2	15	0	2	16	2	3	29	26	49	14	13	53	0	14	14	8	5	15	3	4	25	2	0	6	33	20	82
AC074129.1_ENSG00000238836.1	0	0	1	0	0	0	0	1	0	0	0	0	0	0	0	0	0	0	0	0	0	0	0	0	0	0	0	0	0	0	0	0	0	0	0	0	0	0	0	0	0	0	0	0	0	0	0	0	1
CLCN2_ENSG00000114859.10	1732	1762	1794	1099	3338	1755	1237	2029	851	560	2198	1295	2183	1775	1803	1527	1067	53	689	2426	1811	735	2019	294	358	1842	646	241	2274	1684	1579	874	1409	3668	809	1618	1157	2049	2905	1742	3438	2325	1518	1149	4005	2827	1614	1343	2259
5S_rRNA_ENSG00000252029.1	0	0	0	0	0	0	0	0	0	0	0	0	0	2	0	0	0	0	0	0	0	0	0	0	0	0	0	0	0	0	0	0	0	0	0	0	0	0	0	0	0	0	0	0	0	0	0	0	0
PHLPP2_ENSG00000040199.11	910	1062	897	972	915	2510	1762	953	1166	681	1535	703	1490	804	458	739	370	63	1080	953	1176	805	1228	421	291	2119	606	67	1090	1479	1435	546	1366	1235	660	1246	1477	810	939	1068	1018	1014	642	463	525	1994	1282	921	1358
RP11-393J16.4_ENSG00000226447.1	0	6	0	0	0	0	0	0	0	0	0	0	0	0	0	0	0	0	0	0	0	0	0	10	0	0	0	0	0	0	0	0	0	0	0	0	0	0	0	0	0	0	0	0	0	0	0	0	0
AC005522.7_ENSG00000225703.1	47	42	108	161	53	124	269	138	60	129	72	368	94	82	170	88	48	23	521	406	491	340	75	6	109	133	79	160	254	144	75	77	72	37	56	201	103	202	95	64	137	232	143	28	83	172	42	156	182
RP11-119K6.5_ENSG00000240829.1	125	72	65	129	76	51	80	115	200	108	71	51	64	75	32	40	31	3	26	46	20	9	61	23	13	51	84	15	96	72	121	92	105	89	74	45	144	76	114	53	61	55	77	43	147	103	90	160	117
FAM134C_ENSG00000141699.5	3089	6570	1407	2248	2411	2277	3648	5115	2959	1601	3464	2107	5024	6807	1433	1102	969	137	1162	3545	1089	1142	5364	873	578	1483	1968	200	2725	2614	6272	2425	4458	5657	2715	1591	2705	6020	3358	2648	2052	3298	2422	1190	6022	4655	3550	2086	2692
MIR1267_ENSG00000221650.1	1	0	0	0	2	0	1	0	0	4	1	0	2	0	0	1	0	0	2	4	0	1	0	5	0	0	0	0	3	1	0	1	2	1	1	0	7	0	0	0	0	1	0	0	0	0	0	0	0
RPS2P45_ENSG00000244378.1	48	41	27	56	82	45	63	38	100	53	84	71	47	31	41	53	48	2	69	44	87	64	48	31	42	24	42	5	25	105	18	65	74	40	90	107	50	77	79	114	60	116	34	35	43	57	51	47	37
RP11-671J11.1_ENSG00000237450.3	0	0	2	0	1	0	3	1	3	0	1	0	1	1	0	0	0	0	0	0	1	0	0	3	0	0	0	0	0	0	1	0	0	0	0	0	0	1	0	1	0	0	0	3	0	0	0	0	2
CTA-398F10.1_ENSG00000253505.1	0	0	2	1	1	1	2	10	2	1	0	1	0	0	4	0	3	1	22	2	17	4	1	9	0	2	6	3	0	1	0	0	3	0	0	5	2	2	0	7	1	1	0	0	0	0	0	0	0
C8orf42_ENSG00000180190.7	593	169	182	479	183	257	204	45	133	197	423	319	91	26	119	68	365	18	73	85	94	78	390	82	70	12	1145	6	195	589	333	1234	262	545	148	330	57	148	224	335	565	215	268	358	50	129	518	453	349
RP11-77P19.2_ENSG00000231238.1	8	0	0	0	5	1	4	0	1	0	3	2	1	0	3	0	3	4	8	0	2	0	0	29	0	0	2	1	0	1	0	6	0	1	0	1	0	0	1	0	2	6	0	0	0	0	2	2	0
RP11-1136L8.1_ENSG00000249375.2	9	21	4	5	16	22	29	2	9	3	13	0	6	1	24	13	5	8	4	21	10	9	2	31	0	8	6	3	6	2	2	5	11	0	7	4	1	18	2	4	3	10	4	0	14	10	6	10	9
PCDHB13_ENSG00000187372.8	366	532	176	211	158	115	397	329	268	127	452	691	388	384	58	255	111	27	359	634	53	52	324	43	83	19	205	47	186	154	380	187	649	565	208	141	261	424	710	134	92	148	214	69	240	184	457	441	289
LMOD2_ENSG00000170807.10	1	0	12	0	3	2	0	20	1	2	8	4	0	1	9	2	0	0	0	0	0	8	6	30	0	6	17	0	0	0	0	4	0	1	0	0	0	2	2	5	4	9	5	3	4	4	0	1	0
USH2A_ENSG00000042781.8	106	17	31	4	22	15	24	17	26	11	53	33	35	6	9	21	29	22	7	11	13	7	48	159	8	9	26	8	85	25	46	81	71	43	10	30	5	38	22	30	11	36	21	10	12	16	9	81	21
PET112_ENSG00000059691.7	650	981	227	415	524	1038	855	1207	475	309	788	616	400	490	218	365	258	28	177	808	193	330	619	514	130	398	378	338	1720	661	1136	624	681	1053	520	411	1166	918	682	523	439	471	514	330	1067	870	918	755	699
RP11-29B11.4_ENSG00000231697.1	126	111	90	123	158	114	139	167	134	110	125	133	127	70	180	119	148	17	194	190	147	243	106	28	167	63	183	52	67	440	81	185	106	79	204	378	67	111	175	323	353	400	265	103	88	236	102	186	74
TSKS_ENSG00000126467.5	37	24	12	114	12	13	36	0	40	19	19	29	16	4	2	8	18	4	12	29	30	6	47	18	1	1	62	0	19	39	43	8	29	17	45	21	11	12	52	29	41	25	23	69	12	15	31	34	25
NBPF11_ENSG00000152042.11	5585	4660	5135	7112	5150	4970	4257	4860	8129	5544	6210	6886	5408	6588	5668	4765	2742	708	6746	6567	5581	3566	6043	1590	4533	3891	5919	4114	3310	8906	5638	9702	5723	5403	6303	7441	5470	5700	5824	7800	8714	11551	4961	3411	4452	6489	6198	4392	5934
DHFR_ENSG00000228716.2	1539	2160	532	859	962	3588	2960	2390	1552	593	943	1011	2038	1102	549	660	221	139	479	1259	325	849	699	621	352	1871	1415	1170	1491	808	2421	2171	1786	1264	346	677	2780	1158	891	935	347	602	1046	292	2208	2925	830	1950	1303
RP11-17A4.3_ENSG00000253139.1	1	4	2	40	7	2	4	1	8	5	10	3	5	2	2	2	3	1	1	4	5	0	0	18	0	3	4	4	0	20	4	13	9	1	13	4	1	1	11	3	26	3	4	8	1	3	2	1	4
XRCC2_ENSG00000196584.2	268	378	282	184	302	979	1004	635	598	353	150	527	155	573	529	266	114	109	534	759	457	776	104	67	253	791	139	462	412	339	314	1119	272	296	216	419	285	615	262	145	124	515	217	83	594	481	87	570	215
CDK13_ENSG00000065883.10	3701	3689	3169	2458	3841	4453	6451	4357	3207	3156	4393	4666	4432	4120	3015	2188	2215	416	3471	3123	5172	2918	4410	1336	2540	3989	3309	2383	4522	3479	6150	4577	5260	4511	3254	4032	4110	4648	3747	3270	3444	4419	3654	1824	5499	3664	3775	4082	4573
SEMA5B_ENSG00000082684.9	296	920	170	575	129	352	621	102	377	164	535	184	375	34	84	228	343	7	197	40	144	99	334	32	134	33	439	21	252	368	806	466	623	819	347	314	499	328	470	252	798	547	685	412	167	415	1425	1332	610
RP11-255M2.1_ENSG00000258433.1	0	0	0	0	0	1	1	0	1	0	0	0	0	0	1	0	1	0	0	0	0	0	0	2	0	0	0	0	1	0	0	0	2	0	0	0	0	0	0	0	0	0	0	3	0	1	0	0	0
SYPL2_ENSG00000143028.7	147	65	50	71	100	28	69	11	25	52	291	69	45	15	22	27	89	0	12	43	8	7	81	30	30	0	23	2	24	57	106	33	89	132	43	33	16	18	33	60	67	144	58	91	23	52	713	89	78
TMEM173_ENSG00000184584.8	3147	14711	3245	5572	4289	2785	5895	785	7131	1935	4165	3276	9395	6868	1846	8562	910	285	9458	6205	2177	717	1963	490	1346	1410	1216	180	2263	6581	11340	4111	9110	3768	8677	3292	3140	7003	7990	6270	7538	7097	5165	2837	1164	5894	4770	6051	4464
RP11-68L1.1_ENSG00000251058.1	10	6	0	4	0	0	2	0	2	6	8	2	2	2	0	0	4	0	0	2	0	0	2	6	2	2	28	0	3	0	14	1	8	10	0	0	0	0	0	4	4	3	4	0	0	0	10	2	4
ARFIP2_ENSG00000132254.7	3568	5388	1888	4631	3789	5243	6146	7221	3911	2596	4309	4439	3311	4718	2698	1983	2113	222	2113	5901	4632	1559	5555	1567	1904	3304	1644	2677	5290	4715	4191	3265	3874	4422	3635	4323	6468	5804	4316	3745	4906	3717	4425	1527	6775	5292	3779	3993	4453
RP13-60M5.2_ENSG00000228189.3	0	1	0	1	0	0	3	0	0	0	1	0	0	0	2	1	4	1	0	0	0	0	0	11	0	0	1	0	1	0	0	0	0	4	1	0	0	0	2	0	0	0	0	0	0	2	0	0	3
RP11-360A18.1_ENSG00000225960.1	1	0	0	0	1	0	0	0	0	0	0	0	0	0	0	0	0	0	0	1	0	0	0	3	0	0	0	0	2	1	0	0	0	0	0	0	0	0	0	0	0	0	0	0	0	0	0	0	0
AF121898.3_ENSG00000253500.1	7	2	4	0	1	4	7	8	5	1	1	7	1	7	3	3	2	7	1	3	3	9	1	28	1	0	1	3	1	10	1	4	5	4	0	6	0	1	1	0	4	2	1	1	2	1	0	1	1
AC067945.2_ENSG00000230686.1	0	0	0	1	2	0	3	0	0	0	0	2	4	0	0	0	2	1	2	1	1	1	0	5	0	0	0	0	0	0	2	1	0	0	0	1	0	3	1	0	0	3	0	0	2	0	0	2	0
HMMR_ENSG00000072571.13	633	1751	515	461	624	2265	2814	2044	527	673	353	390	389	1309	253	664	289	591	732	1608	668	1074	261	244	262	3533	297	969	1534	285	865	755	1231	1191	263	356	1465	1161	592	461	95	239	524	164	1427	2110	205	2501	1028
AC063927.1_ENSG00000239496.1	0	0	0	0	2	2	0	0	2	1	0	0	0	0	0	2	0	0	0	0	0	0	2	0	0	0	2	0	0	0	0	0	1	0	0	0	0	0	0	0	0	0	0	0	0	0	0	0	0
RP5-855F14.2_ENSG00000230404.1	0	0	0	0	0	0	0	2	0	0	0	0	0	0	0	0	0	0	0	0	0	0	0	2	0	0	0	0	0	0	0	0	0	0	0	0	0	2	0	0	0	0	0	0	0	0	0	0	0
GINS4_ENSG00000147536.6	431	659	286	261	541	1332	1614	1445	928	498	333	570	635	654	197	174	128	41	398	1182	236	463	230	389	182	371	171	40	862	279	725	756	489	648	220	195	534	807	403	365	200	303	242	94	1335	809	157	736	1432
RP5-1187M17.7_ENSG00000235958.1	143	166	169	171	122	230	176	222	247	143	158	173	139	186	126	132	103	17	209	199	157	188	162	47	96	140	111	66	135	84	179	119	118	231	180	140	131	320	191	146	148	108	155	74	133	119	231	147	191
AL353600.1_ENSG00000244356.1	54	66	24	24	17	26	49	12	78	22	44	24	48	27	10	26	28	2	33	37	15	15	19	4	5	8	50	1	14	54	38	12	39	80	20	45	9	19	35	8	27	16	22	10	27	16	35	28	32
RPS18_ENSG00000231500.2	30950	58990	16782	23835	36385	30767	49279	76368	67051	19105	18638	31363	25501	54828	24229	23514	10633	4500	12240	21257	16439	10247	38340	13967	9279	49280	15087	6012	46610	14726	60829	41930	73075	30957	19809	7051	50018	55111	19055	15255	10371	12716	23173	12429	43100	49822	28688	43716	54982
CTB-46B19.2_ENSG00000249593.2	922	1177	412	511	740	1167	855	1131	1057	364	999	453	797	1048	182	466	396	32	127	1131	215	161	871	106	145	385	698	94	878	359	1246	859	1129	1481	497	263	1257	1130	867	635	262	502	437	101	756	1365	795	889	990
C17orf80_ENSG00000141219.10	805	793	544	388	722	390	964	635	969	294	811	869	615	623	487	211	274	45	402	545	366	324	591	223	187	389	726	259	815	506	1083	533	728	861	319	377	562	940	743	693	419	749	573	345	622	715	1008	828	607
GNS_ENSG00000135677.4	4720	11300	1607	1933	2491	2271	3886	4058	4345	2075	6743	1352	5285	3999	1098	2104	952	268	669	2521	538	833	4351	1158	412	1033	5677	406	5197	2080	11213	2051	6143	9441	1493	1421	2546	3432	3075	2193	1681	2226	1868	692	4803	3659	7569	3860	4753
AL117340.1_ENSG00000196960.2	282	163	187	410	197	228	195	94	256	313	259	369	408	268	100	545	196	4	121	327	367	200	402	3	84	51	85	26	127	374	105	171	248	111	490	267	136	116	198	165	33	332	213	62	93	114	191	470	167
BNIP2_ENSG00000140299.5	2506	1751	3855	1738	2447	2321	3088	1757	2344	2680	3510	3474	4851	2161	1159	2500	592	135	2064	975	2225	701	1956	2984	882	1383	1342	380	3190	1783	3576	2122	4739	3132	1290	2136	3518	2819	3284	1799	1454	1952	1719	1673	1789	2259	3390	2432	2277
AC092289.1_ENSG00000221286.1	0	0	0	0	3	1	4	2	4	1	2	0	0	1	2	3	0	0	6	5	3	1	0	0	3	5	5	1	3	2	0	1	1	0	1	2	0	2	2	2	2	1	0	0	1	1	0	5	1
RBMXL1_ENSG00000213516.5	751	789	555	908	831	902	758	1149	721	881	1000	825	687	822	580	624	309	112	1281	683	475	428	604	419	318	401	723	529	713	480	1396	512	962	1263	586	513	954	799	798	582	563	628	742	403	1113	1108	1093	987	719
AP002962.1_ENSG00000198230.3	0	0	2	4	2	2	0	0	1	3	6	0	4	1	7	0	1	0	0	2	1	5	0	11	0	5	0	2	2	0	0	3	2	0	0	0	0	0	4	4	1	4	0	2	0	3	0	0	0
AC079584.2_ENSG00000236356.1	0	0	0	0	0	3	1	0	0	0	0	0	0	0	0	0	0	0	2	1	0	2	0	0	2	0	1	0	0	0	0	0	0	0	0	0	0	0	0	0	0	0	0	0	0	0	0	0	0
TSKU_ENSG00000182704.5	2067	7067	716	3674	1732	8225	2885	2484	1108	1291	2803	2358	3983	4790	488	1581	225	141	533	3430	318	1807	15400	574	238	1729	321	364	3104	1278	10106	2952	5458	2445	3791	1144	5006	21508	4375	936	1160	1028	1131	478	3915	4432	4614	1772	6755
MT1CP_ENSG00000205360.4	0	10	0	12	2	34	4	0	4	8	9	0	3	38	1	24	4	0	0	20	0	0	0	12	0	0	0	0	2	12	0	4	0	0	451	0	35	10	13	0	7	0	1	28	0	18	0	20	0
AP001166.1_ENSG00000243591.1	0	0	0	0	0	0	0	0	0	0	0	0	0	0	0	0	0	0	0	0	0	2	0	9	0	0	0	0	0	0	0	0	1	0	0	2	0	0	0	0	0	0	0	0	0	0	0	0	0
DUSP1_ENSG00000120129.4	10733	8264	2460	9204	3883	2181	4645	1584	7009	3619	3437	2928	3781	10733	1711	3454	2061	259	1201	10255	821	929	14179	1105	2745	628	3432	3491	7001	6379	11269	10082	7530	8127	23423	3839	3313	8859	7452	2669	11265	2022	7791	3978	4738	10378	10565	10203	5452
NFYB_ENSG00000120837.3	1055	1091	488	1166	955	877	899	1280	2037	507	2008	663	572	600	523	375	205	54	186	670	219	106	997	510	178	474	464	251	908	616	2074	1104	1352	1043	491	224	547	958	960	571	421	682	736	792	1008	1053	3131	1224	958
RP11-451O18.1_ENSG00000253993.1	0	0	0	0	0	3	0	0	0	0	0	0	0	0	0	0	0	0	1	1	0	0	0	0	0	0	0	1	2	0	1	3	1	0	0	0	0	0	0	0	0	1	0	0	0	0	0	0	0
KCNH5_ENSG00000140015.15	12	0	3	1	3	3	0	1	0	3	0	4	1	0	0	3	0	5	6	5	0	9	0	24	0	0	4	2	0	9	2	22	0	5	0	0	0	3	4	2	0	5	0	4	0	1	17	1	0
AC068499.6_ENSG00000250638.1	148	21	33	56	17	25	21	119	32	17	60	38	20	101	11	22	28	0	9	55	9	46	38	20	6	31	22	8	50	5	48	34	24	30	14	19	12	29	31	37	20	22	36	17	107	28	74	66	45
RP5-1068B5.1_ENSG00000230331.1	0	0	0	0	0	0	0	0	0	0	0	0	0	0	0	0	0	0	1	0	3	0	0	2	0	0	0	0	0	0	0	0	0	0	0	0	0	0	1	0	0	0	0	0	0	0	0	0	0
BX255923.3_ENSG00000240907.1	4	23	16	17	28	11	28	9	9	19	17	11	33	16	39	25	9	3	52	40	9	31	7	59	16	2	38	3	9	21	6	15	35	0	11	18	3	10	21	101	1	32	6	21	5	24	12	42	18
7SK_ENSG00000201600.1	21	5	30	8	28	24	1	17	3	13	14	6	9	8	244	5	25	8	42	11	24	96	8	5	12	71	32	103	17	20	17	35	17	20	16	14	5	20	29	26	20	17	31	12	6	11	14	12	12
RP11-323C15.1_ENSG00000235922.1	2	2	0	0	0	0	1	0	1	0	0	0	0	0	0	0	0	0	0	0	0	0	0	21	0	0	0	0	0	2	0	0	0	0	0	0	0	0	0	0	0	0	0	0	1	0	0	0	0
GS1-115G20.1_ENSG00000230470.1	29	27	47	44	60	22	52	90	33	27	50	15	51	16	37	27	41	12	34	38	62	60	93	66	14	49	15	32	55	31	34	18	65	19	30	26	22	43	23	24	8	29	48	21	38	25	40	48	28
GABPB1_ENSG00000104064.10	497	440	314	420	328	842	820	583	463	323	529	410	632	526	171	225	102	31	206	321	197	94	612	495	105	439	323	150	616	339	831	469	730	887	686	242	500	1123	372	303	229	228	257	196	767	547	425	649	467
PDE7A_ENSG00000205268.5	2190	813	959	1358	3930	3452	1766	1627	1111	1258	2029	2831	1273	936	427	897	1069	73	1712	1070	2757	577	1068	676	1194	716	1639	199	1576	2763	1566	3318	1546	3849	5429	2785	585	2441	2122	3662	3323	1714	1016	1014	1137	1175	1711	1324	2070
POLDIP3_ENSG00000100227.12	3342	6874	1438	3267	3272	5580	3908	3988	1782	2084	4470	2391	3131	4685	1307	1472	1189	151	942	1409	736	1383	4018	1973	719	2015	1986	1804	4961	2062	6980	2987	4126	7832	4683	1404	3134	3897	3394	3387	2808	3976	3025	1198	6249	2797	5276	3033	4787
GFRAL_ENSG00000187871.2	6	4	6	1	0	1	5	3	0	0	2	2	4	1	0	0	0	2	1	3	3	0	1	21	1	0	2	0	1	2	1	2	6	1	0	4	1	1	4	4	1	1	0	3	0	0	0	1	2
LRFN5_ENSG00000165379.9	230	97	26	102	72	39	27	4	2	147	56	44	6	2	33	12	33	11	26	15	22	4	37	57	9	2	133	3	79	117	92	33	119	70	28	26	25	14	74	80	23	51	51	65	4	26	129	120	50
C6orf97_ENSG00000120262.8	415	144	147	330	304	133	199	46	953	212	434	177	185	113	452	267	93	32	126	804	87	423	69	100	97	121	993	712	422	95	1622	157	982	112	46	134	280	174	348	177	165	105	311	117	22	561	160	353	176
RP11-48L13.1_ENSG00000229834.1	0	0	0	0	0	0	1	0	0	0	0	0	0	0	0	0	1	0	0	0	0	0	0	1	0	0	0	0	0	0	0	0	0	0	0	0	0	0	0	0	0	0	0	0	0	0	0	0	0
TRBV11-1_ENSG00000211720.3	50	0	0	3	3	1	1	0	6	4	7	0	0	5	0	0	21	1	0	0	0	0	1	0	0	0	3	0	3	6	0	0	10	451	1	1	2	1	1	14	2	1	0	2	2	2	2	4	0
IGHV3-41_ENSG00000253705.1	29	1	47	277	229	19	0	150	25	100	7	22	6	2	1	4	0	6	8	17	6	6	68	1	17	17	48	0	23	8	86	0	76	139	16	0	118	46	101	35	12	38	35	3	788	37	36	831	220
AC009487.4_ENSG00000224076.1	0	0	0	0	0	1	0	0	0	0	0	0	0	0	0	0	0	0	0	3	0	0	0	0	0	0	0	0	0	0	4	0	0	0	0	0	0	0	0	0	0	0	0	0	0	0	0	0	0
UBE2D3P3_ENSG00000224690.1	47	257	20	190	76	133	99	26	32	109	115	64	126	25	29	21	3	4	58	31	36	13	102	12	19	26	41	1	37	87	710	268	216	63	160	40	48	76	130	77	63	156	38	35	68	81	304	45	71
CDK10_ENSG00000185324.15	10583	15437	16606	30662	12814	24391	22785	11171	11490	9809	22354	20233	20873	11218	27316	15995	14492	817	20594	34739	36823	6556	22094	2501	13472	9528	7771	7512	18483	26114	17328	28867	17516	13049	22603	19450	15213	17070	30075	27490	27981	62829	28767	12340	28824	18838	12878	25377	16862
AP001793.1_ENSG00000229442.1	6	2	3	0	0	8	2	0	0	0	2	5	0	0	0	0	0	2	3	5	0	0	3	8	2	2	1	0	5	0	3	1	6	2	0	0	1	7	0	17	15	4	5	4	0	2	2	5	0
AC108134.5_ENSG00000249402.1	197	272	185	189	221	423	461	244	337	147	348	299	366	488	164	201	120	11	90	252	193	200	366	64	38	111	148	87	279	208	352	219	245	299	227	137	272	357	317	152	150	274	298	89	363	123	323	233	252
EXOSC6_ENSG00000223496.1	635	460	241	299	409	1380	1053	1104	579	235	728	408	810	454	300	263	153	32	202	1169	297	251	792	308	194	456	304	84	1016	284	1100	515	833	661	448	118	442	639	477	257	178	350	339	125	862	416	569	661	445
HTR2A-AS1_ENSG00000224517.1	3	3	0	1	3	19	0	0	0	0	2	0	0	0	0	0	0	0	0	0	1	1	0	0	0	0	0	0	1	0	2	1	0	0	3	0	0	0	1	0	2	4	0	0	0	0	6	0	0
OSTF1_ENSG00000134996.11	1345	2550	437	913	621	1906	2036	2077	1348	719	1088	602	2168	2031	223	492	162	53	209	579	157	258	2663	2371	207	330	830	455	2357	550	2465	873	1826	1284	670	393	1439	2512	1111	386	227	293	820	414	1484	4220	924	1284	2356
RP11-368M16.4_ENSG00000229627.2	0	0	0	0	0	0	0	0	0	0	0	0	0	0	0	0	0	2	0	0	0	0	0	2	0	0	0	0	0	1	0	0	0	0	0	0	0	0	0	0	0	0	0	1	0	0	0	0	0
ERAP1_ENSG00000164307.7	3122	4300	1585	2021	2375	4840	4311	3144	2578	2148	4176	2343	6245	5443	1535	1703	656	357	805	1480	638	758	3237	1063	422	2556	1935	906	2034	2059	8745	1992	4081	6096	2063	1478	4001	5952	4496	2355	1163	2011	1612	820	2023	4982	4593	3402	3383
LA16c-23H5.4_ENSG00000233408.1	13	0	2	0	4	6	6	1	11	2	0	0	0	0	0	2	0	0	1	7	1	10	2	36	0	0	1	0	1	3	0	3	0	0	5	0	0	0	0	0	1	0	2	2	1	0	0	0	1
PLA2R1_ENSG00000153246.7	673	2508	413	1108	743	3260	1123	77	2019	766	1652	3096	2720	3695	502	997	188	111	1525	670	279	109	1262	120	176	484	60	228	960	1136	1739	405	592	1336	1259	2500	629	3046	1933	765	455	2751	641	363	394	2474	824	2228	2530
NCRNA00288_ENSG00000218109.3	0	0	1	0	0	1	0	0	0	0	1	0	0	1	0	0	0	0	0	0	0	0	0	4	0	0	0	0	0	0	0	2	0	2	0	0	0	0	1	0	0	1	4	0	0	0	0	1	0
AL109922.1_ENSG00000221312.1	0	0	0	0	0	0	0	0	0	0	0	0	0	0	0	0	0	0	0	0	0	0	0	2	0	0	0	0	0	0	0	0	1	0	0	0	0	0	0	0	0	0	0	0	0	0	0	0	0
JUB_ENSG00000129474.11	838	2877	502	968	899	1694	6412	1120	348	446	1609	2831	2894	1709	362	1624	300	95	2136	1088	378	116	2507	1368	301	1626	454	395	1260	2279	3906	1333	1379	4523	1906	555	1963	14319	1704	682	795	1144	653	309	2935	633	1570	1291	2006
AL591044.3_ENSG00000241031.1	1	0	0	0	0	0	0	0	0	0	0	0	0	0	2	0	0	0	0	0	6	0	0	2	0	0	2	0	2	0	0	0	0	0	0	0	0	0	2	0	0	4	6	1	0	0	0	0	0
ANKRD6_ENSG00000135299.11	1920	1369	1137	1407	1775	707	962	407	953	1211	1550	1222	1609	1546	364	757	687	66	923	674	400	146	1263	289	436	64	489	114	852	1075	2430	1285	1236	1891	1015	1127	1015	1303	1507	1288	2095	1204	1231	1423	916	776	1784	1400	1225
DBF4B_ENSG00000161692.11	937	1973	397	1091	899	874	1410	1070	1874	434	1224	1335	1138	1039	332	906	706	67	1768	2529	1634	799	1113	297	487	1477	855	100	746	1664	847	1044	721	1035	943	1902	1881	1505	1451	2498	2641	3242	1244	682	1889	1493	1514	1451	1233
SNORD115-7_ENSG00000202176.1	0	0	0	0	0	0	0	0	1	0	0	0	0	0	0	0	0	0	0	0	0	0	0	0	0	0	0	0	0	1	0	0	0	1	0	0	0	0	0	0	0	0	0	0	0	0	0	0	1
RP11-545A16.1_ENSG00000238030.1	3	25	70	31	0	0	4	249	15	6	4	11	9	0	31	0	0	4	18	35	81	14	19	24	131	79	4	22	154	23	17	7	13	8	3	7	5	13	25	10	22	30	77	3	6	76	4	8	2
RP5-857K21.7_ENSG00000229344.1	34766	19275	85937	28191	71315	38737	42269	113113	30672	30886	28005	35978	19077	37680	58189	22311	24704	63387	133934	20045	135254	172496	87578	166283	15243	44343	86508	124283	86276	14371	25210	32006	52373	13767	30676	24107	23270	14733	18753	5044	41506	7357	55976	104371	31992	45425	25754	48837	31861
AC126323.1_ENSG00000166104.9	2	0	13	12	16	6	0	0	2	3	28	14	2	1	10	10	43	7	3	6	25	122	36	5	12	5	3	4	21	7	4	285	4	8	2	28	2	19	23	23	33	9	11	7	13	7	16	18	7
MIR889_ENSG00000216099.1	0	0	0	0	0	0	0	0	0	0	0	0	0	0	0	0	0	0	0	0	0	0	0	0	0	0	0	0	0	0	0	0	0	0	0	0	0	0	0	0	0	0	0	0	0	0	0	0	0
PNLIPRP1_ENSG00000187021.10	33991	684	305	215	516	474	1352	61	56	1878	3596	127	166	7665	49	127	59353	457	85	178	85	21	230	1579	4	48	53	582	437	587	185	260	242	80626	625	955	132	1137	493	161	12538	613	469	1479	489	358	2028	0	5142
RP11-459K23.2_ENSG00000232812.1	1	0	0	0	0	0	0	0	3	0	0	2	0	0	2	0	0	0	0	0	2	0	0	10	2	0	0	0	0	0	0	3	0	0	0	0	0	0	0	0	0	0	0	0	0	0	0	0	1
RN5S10_ENSG00000199910.1	27	11	15	33	49	109	56	1	22	335	41	20	33	197	18	76	43	28	103	512	46	8	40	26	14	46	2	6	20	104	6	140	24	10	79	27	102	39	669	25	31	59	12	16	5	3	41	12	50
RP11-1057B8.2_ENSG00000251218.1	0	0	1	0	0	4	0	0	0	0	1	2	0	0	6	0	0	0	0	0	0	6	0	3	0	0	0	0	0	0	0	2	0	0	2	0	0	2	2	0	0	1	0	5	0	0	0	2	0
AC123777.1_ENSG00000239834.1	0	0	0	0	0	0	0	0	0	0	0	0	0	0	0	0	0	0	0	0	0	0	0	0	0	0	0	0	0	0	0	0	0	0	0	0	0	0	0	0	0	0	0	0	0	0	0	0	0
KRTAP29-1_ENSG00000212658.1	0	0	0	0	0	1	0	0	0	0	0	0	0	0	0	0	0	1	0	0	0	2	0	4	1	0	0	0	0	0	2	0	0	0	0	0	0	2	0	4	0	0	0	0	0	0	0	0	0
RP11-37B2.1_ENSG00000251136.2	548	337	663	421	600	651	424	197	504	303	551	891	756	573	471	998	311	53	471	679	558	278	455	96	244	107	270	81	396	1019	363	734	432	321	428	797	261	517	872	420	881	823	444	149	259	316	375	671	372
ST13P12_ENSG00000248400.1	21	22	8	24	13	40	9	15	23	14	24	12	8	14	9	4	7	2	1	6	4	5	11	6	0	9	23	7	15	8	23	14	21	9	22	3	18	10	12	16	1	3	11	4	41	13	16	16	10
RP11-350G8.4_ENSG00000237920.1	0	0	0	1	0	0	0	0	0	0	0	0	0	0	1	3	0	0	1	0	0	0	1	4	0	2	0	0	0	0	1	0	2	0	0	0	0	0	0	0	0	0	1	0	0	0	1	1	2
CTB-180C19.1_ENSG00000254365.1	1	0	0	1	0	0	2	0	0	0	1	1	0	0	0	0	0	0	0	0	0	0	0	2	0	0	0	0	0	0	1	0	0	0	0	0	0	0	0	0	2	0	0	1	0	0	0	0	0
RP11-10K16.1_ENSG00000245213.2	58	80	83	47	60	98	75	234	134	31	107	125	99	72	65	45	31	7	172	88	136	49	113	87	34	37	62	72	132	87	70	48	53	134	27	83	155	126	107	75	88	88	92	30	110	86	133	131	110
ADPGK_ENSG00000159322.10	1793	2220	1846	1871	1816	2578	2840	2075	2767	1965	1689	2485	2404	2154	1287	1637	1002	146	1268	1504	1614	945	1949	287	1659	1226	1246	362	2245	2149	2800	1808	2939	3351	1930	3116	2308	4298	2203	3219	2935	3380	2004	1610	3257	2699	1627	2931	1764
ZCCHC8_ENSG00000033030.9	1461	2200	1274	1836	1723	1373	1596	1948	1444	1608	1727	1815	1251	1140	1074	1266	702	129	1576	1627	1319	465	1563	434	867	1160	638	462	1501	2200	1864	1493	1638	2074	1444	910	1312	2325	2165	1501	1679	2046	1406	999	2022	1057	1188	2435	1565
PHRF1_ENSG00000070047.6	5405	11418	3023	8778	4912	5162	10508	9860	7018	7705	7732	6611	8868	8331	4033	3407	4374	458	3054	11703	6847	4339	21346	2584	4812	8236	2812	5081	8314	6010	10592	8150	8179	8250	9376	8201	10086	16561	11683	4703	5722	5344	12891	3354	14482	6790	9419	10191	10501
RP11-203L2.3_ENSG00000236998.1	14	6	10	13	26	4	18	57	15	14	13	13	28	2	17	9	5	5	2	12	13	24	26	42	13	7	8	32	33	8	18	8	10	8	10	26	55	5	8	13	1	20	13	0	36	24	12	17	32
RP11-500G10.1_ENSG00000237489.2	66	42	82	45	86	95	68	18	67	22	102	61	90	35	61	13	83	1	39	50	25	96	74	22	54	20	64	16	93	70	63	86	114	92	61	52	15	35	57	202	138	122	71	26	26	45	109	109	151
RP1-52J10.9_ENSG00000226947.1	0	0	0	0	0	0	0	0	0	0	0	0	0	0	0	0	0	2	0	0	0	0	0	0	0	0	0	0	0	0	0	0	0	0	0	0	0	0	0	0	0	0	1	0	0	0	0	0	0
ZCCHC11_ENSG00000134744.9	4943	2311	1677	2611	5617	4575	3552	3195	5559	3093	3761	6309	1626	3716	1308	675	2907	394	3830	3815	2405	2250	1563	655	3392	3583	3839	2007	1441	4857	4257	3062	3757	4243	12977	4162	2221	927	4086	7592	3908	5916	2214	2726	415	3164	3932	3267	2845
RP11-10A14.6_ENSG00000253252.1	0	0	0	2	1	1	0	0	1	0	2	1	3	0	5	2	1	0	4	3	0	0	0	3	0	0	0	0	3	0	1	14	0	0	0	4	0	0	1	1	0	2	0	0	0	1	0	0	1
MIR92B_ENSG00000208011.1	2	2	0	0	0	0	1	0	0	0	1	1	2	3	0	2	1	0	2	1	0	0	1	0	1	0	0	0	2	0	0	3	0	0	1	0	0	2	2	0	0	2	1	0	0	0	1	2	1
METTL11A_ENSG00000148335.8	1148	1778	883	2183	1069	2063	3283	2452	1083	1169	2270	846	2549	1634	3438	1800	673	152	520	3902	798	3004	4026	1648	1094	904	610	2026	3702	1756	3626	1200	3140	1491	1424	1794	1305	2587	1685	1044	2438	1835	2347	922	3075	3871	1647	1817	3286
AC055764.1_ENSG00000234136.1	95	122	78	126	97	140	105	77	176	214	144	121	109	217	97	82	51	13	167	112	75	65	119	41	60	57	41	51	90	148	135	76	107	131	123	122	113	153	119	72	72	73	99	48	95	96	149	97	116
AC007842.1_ENSG00000187534.4	1348	2547	557	913	695	675	1228	2369	882	450	903	415	2024	762	429	1031	292	153	356	2383	497	186	2712	2192	278	601	408	539	3049	663	2673	824	1485	2551	618	449	1662	2428	1350	640	545	446	886	374	2002	2157	1023	1748	2280
7SK_ENSG00000252757.1	20	5	6	20	12	41	4	0	3	5	19	32	8	10	13	4	12	2	29	52	5	2	5	9	1	0	3	0	14	16	6	11	10	19	6	20	0	1	10	22	24	14	10	20	0	5	11	21	9
GAPDHP29_ENSG00000178596.10	0	0	0	0	0	0	0	0	0	0	2	0	0	0	0	0	8	3	0	0	0	2	0	0	0	0	0	0	0	0	0	4	0	4	0	0	0	0	0	0	0	0	0	0	1	0	1	0	2
CPSF3L_ENSG00000127054.12	18726	22453	20694	44158	28477	67797	28783	27795	26430	22322	30672	29787	24599	26732	24805	19527	19667	4012	31778	64130	30442	17382	27170	10078	14133	23569	14675	22140	36575	40275	33495	19378	29619	33073	50213	34471	23598	24577	43456	30068	40095	52123	47673	20111	46120	34092	31761	38499	33184
RP11-36D19.8_ENSG00000235858.1	0	0	0	0	0	0	0	1	0	0	0	0	0	0	0	0	0	0	0	0	0	0	0	0	0	0	0	0	0	0	0	0	0	0	0	0	0	0	0	0	0	0	0	0	0	0	0	0	0
NKX2-4_ENSG00000125816.4	0	0	0	0	0	0	0	0	0	0	0	2	0	0	0	0	0	3	0	0	0	0	0	0	0	0	0	0	0	0	0	0	0	0	0	0	0	0	0	0	0	0	0	0	0	0	0	0	0
SRP9_ENSG00000143742.8	4181	6415	2093	2799	3088	5785	4300	4918	3647	2167	4035	2391	3768	5390	1283	2009	801	263	1312	2591	1477	814	6087	3699	903	1930	3711	3638	7425	2285	9238	11271	5564	5572	2129	1332	5401	4670	2852	2169	1418	2151	2318	1674	5380	7290	3706	4093	4980
RP11-95K23.5_ENSG00000228858.1	10	2	0	0	1	2	3	1	0	0	0	1	0	0	2	0	2	2	0	2	1	1	0	11	0	0	0	0	0	0	0	1	0	0	0	1	0	0	1	0	0	1	2	2	0	0	1	0	0
5S_rRNA_ENSG00000199572.1	0	0	0	0	0	0	3	0	0	0	0	0	0	7	0	0	0	0	0	1	0	0	0	7	0	0	1	0	0	2	0	1	0	0	0	0	0	0	0	0	0	0	0	0	0	0	0	0	0
MRPS23_ENSG00000181610.7	336	822	88	337	308	406	643	775	448	171	391	328	321	966	237	159	93	35	112	445	96	83	865	511	93	490	274	241	886	215	823	318	519	498	295	70	529	1111	281	214	82	157	178	156	635	589	479	457	450
CAPN1_ENSG00000014216.9	31522	98522	14076	26177	23998	84384	43080	36459	16369	19512	33905	21120	50431	64403	11161	30881	10660	2497	14898	52769	16863	5173	92484	48307	7574	26116	10333	9852	51070	23939	77963	29079	61422	73522	28036	21034	63091	130024	46333	17504	16040	21973	26531	10488	57876	55032	37421	29677	36282
RP11-428G2.1_ENSG00000235356.1	1	0	0	0	0	0	0	0	0	0	0	0	0	0	0	0	0	0	0	0	0	0	0	2	0	0	0	0	0	0	0	0	0	0	0	0	0	0	0	0	0	0	0	0	0	0	0	0	0
CTB-12O2.1_ENSG00000254226.1	23	0	37	13	8	8	26	5	20	15	12	11	2	2	0	6	60	5	338	31	13	2	9	21	0	9	15	0	45	39	14	3	29	4	4	9	2	14	3	72	83	11	22	15	3	9	18	31	17
CACNA2D1_ENSG00000153956.10	1308	303	390	496	404	413	199	197	2022	267	1647	590	117	727	197	112	189	33	102	305	1018	88	252	234	103	22	237	27	605	180	1102	337	787	1563	113	194	134	177	209	755	281	550	409	342	102	248	2403	871	346
U6_ENSG00000200213.1	0	0	0	0	0	0	0	0	0	0	0	0	0	0	0	0	0	0	0	0	2	0	0	2	0	0	0	0	0	0	0	0	0	0	0	0	0	0	0	0	0	0	0	0	0	0	0	0	0
AC005358.1_ENSG00000179136.1	13	2	4	4	1	2	1	0	1	2	8	2	0	0	3	5	0	3	7	5	4	4	2	53	2	0	1	0	2	7	0	2	4	1	21	8	0	0	4	0	3	5	4	10	10	13	12	3	3
FOXF1_ENSG00000103241.4	738	921	264	1163	650	528	371	222	225	332	3666	366	404	41	809	306	144	23	40	445	101	207	626	82	109	211	145	78	270	242	853	473	750	472	328	133	471	166	689	291	237	1236	695	267	78	152	5236	1600	690
SYNPO2_ENSG00000172403.6	1743	1112	574	1440	1156	890	825	117	350	771	51490	537	389	98	12384	228	116	55	128	152	179	61	641	516	325	44	2129	72	367	667	2512	738	1603	1520	340	395	193	587	726	820	665	13839	792	1307	232	1348	169783	1523	921
PASK_ENSG00000115687.9	741	1486	577	829	1549	1382	1551	1289	668	1034	1036	1362	1264	1125	1649	1540	622	48	674	2365	2019	1159	1870	428	1022	927	615	290	516	1782	1223	1852	1841	1096	532	1421	989	1584	2230	1909	2010	3098	1588	705	1811	1448	870	1108	1703
RP11-982M15.6_ENSG00000256050.2	32	44	27	11	38	35	116	49	24	57	41	63	42	46	29	32	4	1	27	21	12	93	107	15	4	13	4	10	52	41	31	3	16	48	11	54	191	152	48	18	20	121	67	11	59	132	27	29	38
SERPINA9_ENSG00000170054.10	0	3	0	2	223	0	0	2	0	6	1	0	1	0	4	0	0	11	2	2	0	0	0	17	50	0	12	0	4	0	8	0	21	26	0	16	1	4	0	59	0	0	7	4	0	0	6	2	10
RP11-335E6.2_ENSG00000203605.3	4	1	4	1	3	6	2	0	5	5	3	8	3	5	8	1	4	3	4	4	5	11	1	3	3	0	2	4	1	4	1	2	2	0	3	3	1	2	2	1	4	3	2	5	1	2	1	2	5
5S_rRNA_ENSG00000201301.1	1	0	0	0	0	0	0	0	1	0	0	0	1	0	1	0	0	0	0	0	0	0	0	2	2	0	0	0	0	0	0	0	0	0	0	0	0	0	0	0	1	0	0	0	0	0	0	0	0
AP001055.6_ENSG00000225331.1	187	76	76	144	215	95	96	34	584	267	142	201	327	29	62	303	129	24	60	274	165	40	83	29	115	50	115	11	63	218	140	95	314	88	129	99	133	134	285	250	131	173	110	84	123	71	136	194	187
WWP1_ENSG00000123124.8	3137	5092	2344	1457	2561	3532	3019	2475	1651	2334	4620	2093	2970	4926	2669	1622	578	224	855	898	1225	853	2796	6664	787	1394	2480	2155	4301	1897	6312	3162	3236	5743	1654	1692	1671	2373	2355	1811	1678	2718	1914	1008	4416	2325	3105	2417	3694
PSMA8_ENSG00000154611.9	4	0	0	0	1	0	1	0	0	2	1	2	0	0	3	1	0	1	1	0	5	0	0	20	2	0	54	1	2	0	0	0	5	3	2	0	0	0	3	4	0	0	2	2	0	0	3	17	4
C1orf174_ENSG00000198912.6	714	575	534	858	830	2392	1533	1527	1594	851	1647	1489	1571	884	540	657	519	58	483	698	528	684	1120	782	320	945	414	275	1266	1764	1527	713	1441	1334	692	696	1417	1219	1276	1726	853	1951	935	686	1446	1477	1687	1427	1423
PIWIL4_ENSG00000134627.7	985	782	1294	466	661	307	709	775	391	835	1637	314	1847	756	1097	681	312	79	197	423	730	189	1830	325	803	751	885	180	1239	1432	1497	1784	1761	1037	506	348	1360	1012	900	597	949	1004	1046	379	2443	844	615	593	816
AC017048.4_ENSG00000224577.1	19	4	2	31	15	25	21	1	24	6	8	9	16	2	4	19	6	1	7	4	11	0	19	7	5	0	15	0	6	17	32	31	10	5	62	12	2	9	32	7	8	7	7	14	3	6	15	20	0
MIR548K_ENSG00000221333.1	34	23	27	24	29	44	23	53	34	37	33	28	56	39	27	29	11	1	34	26	37	26	33	25	29	39	25	100	39	39	58	39	31	32	28	73	36	45	43	23	22	48	22	11	30	28	26	34	24
U6_ENSG00000201390.1	22	16	18	8	26	10	29	13	16	38	19	21	19	18	19	2	15	11	17	14	16	15	18	7	12	25	20	18	23	11	7	33	29	15	15	11	20	12	13	12	6	20	21	5	18	18	10	21	12
TRAJ28_ENSG00000211861.1	1	0	0	0	5	1	1	33	5	1	3	1	1	0	0	0	0	0	0	0	0	0	0	0	4	2	9	0	0	0	2	2	22	0	0	0	6	0	7	36	2	0	1	1	10	0	0	23	5
PIH1D2_ENSG00000150773.6	167	149	81	84	85	117	151	65	99	32	183	173	123	71	46	105	52	8	35	275	61	17	62	54	16	46	27	30	278	136	136	222	147	145	47	148	188	479	99	66	197	107	75	19	66	223	88	116	149
RP11-406D1.2_ENSG00000255094.1	0	2	0	2	0	0	3	2	0	0	0	0	0	0	0	0	0	0	0	2	0	1	0	3	0	2	0	0	0	0	2	1	0	0	3	0	0	0	0	0	3	0	3	0	0	0	0	3	0
C1orf52_ENSG00000162642.9	492	378	422	729	453	524	568	431	781	611	476	1027	387	423	357	449	173	56	365	591	338	107	309	124	241	142	343	153	320	456	633	413	493	512	730	296	465	494	512	384	303	500	352	200	631	618	598	771	618
HEYL_ENSG00000163909.6	3600	2757	1476	1869	2049	1036	1437	194	1305	678	2402	1696	1629	273	121	1696	868	44	226	535	286	272	8012	226	419	135	911	58	1196	1354	3503	857	4711	6679	1200	1310	671	1586	2051	1498	2955	1481	3886	3506	1023	2214	4389	3818	3677
LY9_ENSG00000122224.10	62	46	28	50	845	27	71	70	180	217	63	24	132	15	12	8	30	45	14	56	52	33	54	42	505	16	178	3	62	67	50	46	651	41	16	24	59	36	230	1656	19	47	38	272	50	56	28	505	90
AC024367.1_ENSG00000243951.1	42	20	61	28	36	22	33	25	22	24	31	19	36	1	89	15	65	9	57	23	36	21	7	14	2	51	42	17	11	41	20	68	20	25	11	36	5	14	11	16	77	26	32	22	2	16	22	20	29
MGLL_ENSG00000074416.8	8430	36007	12469	11136	11339	12026	11243	19198	6153	12433	10139	13459	35374	41486	20402	18654	1844	1951	2290	14537	13247	857	73094	13664	4146	8952	9181	3450	30652	10424	35003	9206	19157	36281	12032	8449	69234	52342	25636	2902	8163	4916	26782	5729	38364	19567	13805	7833	25840
AP001422.3_ENSG00000231231.1	4	0	0	4	0	3	5	0	7	0	1	0	2	0	3	1	0	2	1	0	4	0	4	2	0	0	0	0	1	0	0	1	0	1	2	0	1	1	1	4	0	0	0	0	1	4	2	2	0
OSR2_ENSG00000164920.5	418	523	157	432	362	179	606	239	52	116	347	265	118	231	46	144	45	18	146	760	214	18	337	289	8	284	29	3	385	221	510	757	274	261	204	109	167	201	274	137	121	292	173	189	413	266	442	230	463
AL353997.3_ENSG00000205266.4	3	27	36	27	5	4	3	88	7	16	4	0	26	1	7	30	11	11	19	9	13	5	4	34	19	5	2	17	11	12	17	49	15	13	14	18	9	16	23	11	16	18	27	25	41	26	3	10	8
STIL_ENSG00000123473.10	262	597	472	324	412	606	1083	1081	550	481	508	498	485	387	529	575	112	35	469	516	821	350	184	332	803	898	146	184	439	789	848	263	507	604	180	989	428	365	619	580	508	789	500	147	1097	1554	351	1030	441
RP11-73B2.6_ENSG00000227910.1	9	15	6	1	5	1	14	0	7	1	1	9	0	2	2	0	3	2	2	2	2	0	5	20	0	0	9	0	3	6	2	0	0	6	0	3	0	0	3	7	27	3	3	3	0	0	13	0	14
RP11-175M2.1_ENSG00000251368.1	0	0	0	0	0	0	1	0	0	0	0	0	0	0	0	0	0	0	0	0	0	1	0	2	0	0	0	0	0	0	0	0	0	0	0	0	0	0	0	0	0	0	0	0	0	0	0	0	0
5S_rRNA_ENSG00000212171.1	0	0	0	0	0	0	0	0	0	0	0	0	0	0	0	0	0	0	0	0	0	0	0	2	0	0	0	0	0	0	0	0	0	0	1	0	0	0	0	0	0	0	0	0	0	0	0	0	0
snoU13_ENSG00000238472.1	0	0	0	0	0	0	0	0	0	0	0	0	0	0	0	0	0	0	0	0	0	0	0	0	0	0	1	0	0	0	0	0	1	0	0	0	0	0	0	0	0	0	0	0	0	0	0	0	0
ITIH4_ENSG00000055955.10	2433	966	620	1680	1241	613	814	238	4937	832	2971	1794	1442	374	410	809	2792	71	1167	3962	680	394	699	44	1254	170	925	1033	814	3351	612	11835	1655	6753	884	2364	713	953	3043	2685	3444	2089	1291	1548	336	1170	1797	1659	2327
HSD17B8_ENSG00000204228.3	738	1301	405	374	1124	713	975	744	483	273	673	1177	597	1172	383	361	548	31	346	1129	236	201	1903	318	165	251	280	267	1252	650	1601	351	831	1888	339	252	1816	857	777	606	826	500	522	276	1478	1261	695	479	1184
MIR517A_ENSG00000207734.1	0	0	0	0	0	0	0	0	0	0	0	0	0	0	0	0	0	0	0	0	0	0	0	0	0	0	0	0	0	0	0	0	0	0	0	0	0	0	0	0	0	0	0	0	0	0	0	0	0
C20orf191_ENSG00000240108.1	3	7	3	4	5	6	7	7	4	7	7	5	4	10	7	6	6	3	4	5	11	4	4	7	6	6	1	8	4	3	7	8	1	7	9	3	5	3	4	6	6	6	11	5	19	5	9	12	7
AC020983.5_ENSG00000243099.1	57	61	23	50	55	54	43	81	39	24	34	25	42	90	11	24	13	6	9	25	4	12	53	47	4	24	21	11	53	27	64	73	71	98	61	11	43	82	36	43	16	17	48	21	81	65	72	72	61
RP13-259N13.2_ENSG00000203565.2	0	0	1	3	0	0	2	5	2	2	0	1	0	0	2	1	0	3	0	0	1	1	0	5	1	0	1	0	3	7	0	1	0	0	1	3	0	0	1	0	1	1	2	0	0	0	0	2	5
RNU1-13P_ENSG00000238825.1	6	6	15	9	9	18	9	5	27	11	13	9	19	1	2	3	34	1	10	7	6	12	11	2	1	2	8	0	2	22	3	32	9	6	6	8	2	2	11	16	5	22	3	2	0	2	4	9	3
RP11-93K22.14_ENSG00000250580.1	2	5	0	1	4	0	1	6	3	2	0	1	4	2	0	3	3	0	4	10	9	0	2	1	5	4	12	1	1	2	4	3	2	8	0	1	6	3	0	1	3	3	3	0	4	16	0	6	6
AC005281.2_ENSG00000225606.1	9	23	7	14	10	2	13	24	15	39	10	8	33	4	2	11	2	4	7	8	21	0	10	28	1	5	4	18	18	18	50	5	9	19	17	5	11	20	17	5	3	8	16	10	21	12	7	5	19
SNORA26_ENSG00000212490.1	0	3	0	0	0	5	2	4	0	1	0	0	0	4	1	0	0	1	1	0	0	0	0	5	0	0	6	1	3	0	1	3	0	1	2	0	1	1	0	0	0	0	1	0	2	1	0	0	0
PRKCD_ENSG00000163932.9	7338	15296	3331	5913	5473	4863	7243	10351	4499	6894	5009	6598	7603	7389	2390	7658	2593	994	2927	12468	4979	1077	11762	10391	2146	2355	1525	1310	18645	6191	13110	2479	7410	12190	2589	7241	7596	7218	9092	5606	7262	3442	8790	2490	8173	18147	4323	4996	13510
RP11-107P7.4_ENSG00000254567.1	2	1	0	0	0	2	0	0	0	1	0	1	1	0	0	0	0	0	0	1	2	3	0	5	0	0	0	0	0	0	0	0	0	0	0	0	0	0	0	0	0	0	0	0	0	0	0	0	0
IGHV3-38_ENSG00000211958.2	25	10	44	214	188	19	0	148	20	88	3	19	2	0	0	2	0	4	4	17	3	6	44	9	4	12	4	0	20	8	85	0	55	127	12	0	110	51	87	24	17	38	37	3	734	35	68	814	227
PROX1_ENSG00000117707.8	2590	218	498	237	306	279	732	25	158	269	2650	583	409	173	1248	45	962	32	116	136	197	724	263	310	144	694	1806	1377	1096	575	1377	12057	674	5087	99	1265	105	521	673	406	999	114	466	341	46	437	910	653	783
U6_ENSG00000200360.1	0	0	0	1	1	0	0	0	1	0	0	1	1	0	0	0	0	0	0	0	0	0	0	0	0	0	0	0	0	0	2	1	1	0	0	0	1	0	0	0	0	0	0	0	0	1	1	0	1
CREB3_ENSG00000107175.6	2185	4362	802	1894	1356	2014	4351	3220	1695	853	2681	890	1457	1554	726	862	685	73	456	1414	433	749	5562	1212	402	1152	1175	1134	3128	1429	4371	2140	3096	2762	2023	673	3716	1998	2108	920	1668	1109	1252	712	1893	5917	3958	1504	1742
MAPKBP1_ENSG00000137802.9	3771	5213	2637	5081	3359	6698	2740	3994	4833	2811	6206	5149	4197	3835	2408	2428	2193	198	1845	1932	1847	1471	5492	776	1539	2541	3666	952	2795	5168	5181	3967	4029	5436	9217	3456	3333	10865	7379	5180	7515	6946	5882	3097	5124	3456	13027	5126	4675
RP3-483K16.3_ENSG00000219863.3	1	0	0	0	0	0	0	2	2	0	0	0	0	0	0	1	0	2	0	1	0	0	0	2	2	0	0	0	0	0	0	0	0	0	0	0	0	0	0	0	0	0	0	1	0	0	1	1	2
AICDA_ENSG00000111732.6	1	4	3	13	57	3	14	0	3	3	6	2	7	1	6	12	0	12	3	4	5	1	3	46	36	3	1	1	2	5	1	5	7	0	13	3	4	5	6	22	5	1	3	5	0	1	1	7	13
RP11-572M11.1_ENSG00000241219.1	22	7	18	19	25	36	18	10	49	17	11	32	19	14	54	10	34	14	22	10	47	14	3	7	28	7	100	7	2	45	16	21	13	13	10	19	1	20	11	39	14	27	14	31	0	8	13	34	1
GLT25D2_ENSG00000198756.6	489	670	311	205	908	32	129	17	132	551	606	91	784	94	2500	336	158	148	11	264	45	202	92	369	77	13	5404	470	573	137	541	555	762	549	7	263	511	17	120	285	438	937	812	158	2129	877	693	301	332
RP11-324O2.3_ENSG00000232934.1	111	1684	273	256	134	47	204	75	68	171	148	48	787	151	74	248	15	23	38	70	58	120	303	84	17	114	37	46	208	197	924	41	345	775	29	143	468	310	635	170	122	259	91	13	207	418	102	177	311
SPOP_ENSG00000121067.11	3166	2894	1273	1997	2566	2137	2683	2109	3052	1580	4078	1785	3410	3255	1505	1130	1024	167	1278	2937	991	628	2369	2311	696	1310	2582	887	4032	1537	4927	2431	3473	3197	1923	1118	2982	3400	2230	1852	1292	1935	1799	1243	3153	3098	7297	3013	2433
ZFP3_ENSG00000180787.4	311	91	74	79	348	262	179	538	203	88	359	239	339	167	179	94	117	24	174	109	122	367	381	191	95	18	256	21	230	145	434	620	312	428	93	111	224	438	357	198	249	426	247	78	196	204	408	221	235
UNC45B_ENSG00000141161.6	8	3	5	1	4	4	11	4	11	0	11	5	8	0	5	4	4	6	8	3	1	5	3	43	3	1	0	0	0	0	8	1	2	0	0	0	0	0	8	15	300	6	1	12	1	4	6	6	8
RP11-760D2.7_ENSG00000213650.3	10	19	13	7	9	18	7	40	9	2	21	12	17	28	1	6	4	3	15	4	1	4	16	17	8	7	13	11	13	8	30	7	15	38	8	8	18	20	8	12	15	7	15	2	23	25	18	22	11
RP11-57I17.3_ENSG00000226289.1	0	0	0	0	1	0	0	0	2	0	0	4	4	0	3	0	1	2	1	4	1	0	0	10	0	0	0	0	0	0	0	3	0	0	0	1	11	2	0	4	0	0	1	5	0	0	1	5	0
RPL31P11_ENSG00000213075.7	7	3	0	4	15	1	1	2	8	1	2	2	4	2	0	0	0	1	5	1	0	2	0	15	2	0	2	1	1	3	2	9	6	1	2	0	4	1	0	2	0	0	0	3	0	4	1	2	3
ERP44_ENSG00000023318.7	2225	3189	893	926	1288	3011	3029	2986	1989	1294	2314	1046	2774	2512	739	1222	566	173	771	1525	481	579	3449	873	369	924	854	443	3156	1114	3054	1916	3007	1994	1037	899	1876	3766	1356	808	832	905	936	375	1819	4262	1645	1977	1709
NECAB3_ENSG00000125967.11	2458	2772	2627	3155	2575	4087	4683	5015	4265	2078	3392	3508	2274	6436	3192	3386	2050	188	2533	4920	4058	2669	3504	1078	2042	2842	969	1416	4232	3411	2892	3418	3185	4138	2405	3250	2998	6673	4103	2438	4027	3933	3531	1470	8104	2383	3974	3887	3869
RP11-727M10.2_ENSG00000248760.1	0	3	0	0	0	4	0	3	1	0	0	0	8	0	0	1	0	4	0	0	6	0	0	1	0	0	0	0	0	0	0	0	0	0	2	1	0	0	0	1	0	0	0	0	0	0	0	2	0
NRAP_ENSG00000197893.7	302	63	109	30	151	45	209	5	21	30	992	176	57	1	56	20	238	41	9	60	24	15	69	45	0	8	51	5	242	108	194	298	58	1879	9	236	68	265	340	178	248	48	57	25	12	354	402	55	524
RP11-278L15.6_ENSG00000244503.1	193	1245	804	107	443	14	172	293	121	27	229	193	67	8	121	733	121	19	7	98	94	2	4413	70	56	44	46	76	1479	403	650	1125	83	523	0	70	4	94	1068	118	224	12	253	31	89	898	158	212	313
VN1R66P_ENSG00000237185.1	0	2	0	0	0	0	0	0	0	0	0	0	0	0	0	0	0	0	0	0	3	0	0	3	0	0	0	0	0	0	0	0	0	0	0	0	0	0	0	0	0	0	0	1	0	0	0	2	0
RP11-7F17.1_ENSG00000243225.1	5	4	1	18	3	165	58	0	2	1	3	38	2	2	0	60	0	0	0	50	1	0	1	2	90	1	0	1	9	50	2	0	0	1	7	54	2	51	2	58	1	7	7	2	0	3	0	0	4
IMMP2L-IT1_ENSG00000228540.1	49	28	14	24	4	35	33	41	13	9	30	20	2	70	10	17	9	2	18	18	7	11	27	20	8	10	7	6	34	8	27	25	40	18	12	9	10	23	18	12	6	5	11	12	29	23	37	17	23
CEACAMP2_ENSG00000230558.1	13	78	3	6	2	15	36	1	24	10	8	11	9	4	7	47	14	2	24	18	30	4	1	7	3	3	12	0	24	5	57	1	4	95	10	78	36	11	8	6	1	8	1	3	29	67	0	6	81
GABRB1_ENSG00000163288.9	43	4	22	0	20	0	5	0	5	1	13	4	0	2	79	3	8	3	0	3	5	1	6	28	0	0	93	0	16	10	24	0	2	34	2	2	1	0	5	5	3	3	11	11	0	20	39	18	6
FAM126B_ENSG00000155744.4	1149	1565	1305	1057	1435	2021	2090	1628	1584	1485	1344	1547	1560	2144	1033	1349	353	140	876	1275	1253	398	890	656	428	495	549	448	1710	944	1306	814	1419	1361	1116	858	1327	1260	1509	637	738	810	773	310	1313	946	822	2691	1184
CTD-2588C8.1_ENSG00000239210.1	5	12	5	5	3	4	7	12	2	4	3	1	2	3	0	11	0	0	7	2	4	1	4	7	0	4	1	1	2	3	1	1	4	11	6	2	2	9	6	0	0	0	4	1	1	6	2	4	0
AC091558.1_ENSG00000247743.1	1938	1099	822	1594	1581	1084	955	1363	1831	1386	1886	2277	1155	1488	707	861	686	36	870	1254	529	713	2085	234	524	553	787	290	1300	1919	1615	2428	1138	2355	1439	1942	1094	3092	1898	2439	2192	3112	1231	755	2262	1269	2435	1684	1587
ZRSR1_ENSG00000212643.1	799	471	750	571	933	862	659	454	804	547	532	606	830	441	976	414	478	398	451	967	1271	848	507	102	336	433	1255	1112	403	593	584	528	842	523	1005	296	436	619	834	403	442	575	564	674	349	499	376	783	574
MRPL44_ENSG00000135900.3	537	942	176	315	369	704	770	1047	375	250	549	230	595	1544	171	191	82	32	127	520	104	67	609	700	110	287	361	294	962	187	1155	308	760	1039	362	84	580	800	474	239	100	212	249	162	770	449	462	553	367
RP11-598C10.2_ENSG00000223800.1	1	0	0	0	0	0	1	0	1	1	0	0	0	0	0	0	0	0	0	3	0	0	0	2	0	0	12	0	0	0	0	0	0	0	0	0	0	0	0	0	0	0	0	0	0	0	0	0	0
snoU13_ENSG00000238295.1	8	1	9	2	5	2	6	1	9	3	4	12	8	8	6	2	0	0	6	1	1	2	2	3	2	2	1	2	0	4	4	8	1	7	3	3	9	11	2	3	2	4	2	1	0	2	1	7	2
AL050335.2_ENSG00000242989.1	2	0	0	0	0	0	0	0	0	0	0	0	1	0	0	0	0	0	0	0	0	0	0	3	0	0	0	0	0	0	0	0	0	0	0	0	0	0	0	0	0	0	0	0	0	0	1	0	0
RP11-163O19.10_ENSG00000255214.1	2	0	0	0	0	0	0	0	0	0	0	0	0	0	0	0	0	0	0	0	0	0	2	12	0	0	0	0	0	0	0	0	0	0	0	0	0	0	0	0	0	0	0	0	0	0	0	0	0
OR51D1_ENSG00000197428.2	0	0	0	0	4	0	2	0	0	0	0	0	0	0	0	0	0	0	2	2	0	0	0	0	0	0	0	0	3	0	3	0	0	3	0	0	2	2	6	0	0	0	0	0	0	0	0	0	0
AC016691.2_ENSG00000233741.1	2	0	1	0	0	2	2	0	2	0	0	0	0	3	3	0	0	0	0	2	2	3	0	0	2	2	2	0	1	0	0	0	0	0	0	0	0	0	0	0	0	0	0	1	0	1	3	3	0
SIX6_ENSG00000184302.5	2	0	0	0	0	3	0	0	0	0	12	0	0	0	0	0	0	0	2	0	0	2	0	1	0	0	2	0	0	0	0	0	0	0	0	2	0	0	0	7	4	0	0	0	0	2	0	2	0
RP11-982M15.5_ENSG00000258858.1	34	101	16	51	69	90	95	50	19	51	47	89	53	100	18	182	6	2	18	43	35	53	150	76	32	34	10	29	48	71	81	17	52	78	20	56	123	99	153	22	33	89	65	13	75	71	34	65	68
RP11-146E13.3_ENSG00000258198.1	115	252	48	293	54	291	451	147	258	77	95	290	338	163	21	155	31	14	199	155	399	93	169	88	97	121	28	28	135	82	248	344	142	148	179	206	192	272	146	144	89	92	162	48	525	230	160	130	267
CTB-51E13.1_ENSG00000250322.1	1	4	2	0	1	5	5	3	3	6	2	2	3	2	0	0	0	0	0	0	1	3	2	6	0	2	2	2	2	1	5	2	1	1	2	2	2	5	2	2	0	3	1	0	3	3	4	6	1
UBA52_ENSG00000221983.2	6163	6766	2965	3056	4639	4208	7155	7773	6094	3274	3228	2927	5000	7417	1567	2629	1466	805	1320	5375	2319	1499	4307	3997	857	4989	2208	781	9969	2295	7580	4748	7345	5453	4500	711	2999	6406	3255	2115	1174	952	2664	1598	9387	5037	4117	5932	5757
PTP4A2P2_ENSG00000254481.1	9	6	6	8	11	16	12	6	22	12	34	6	7	5	4	7	3	2	10	7	1	5	12	2	4	4	29	5	9	1	25	10	12	11	12	2	8	4	7	6	2	3	6	3	6	10	31	26	12
ACTBP12_ENSG00000233125.1	0	0	2	1	0	0	0	1	0	0	0	0	0	0	0	0	1	1	0	0	0	0	1	7	0	0	0	0	0	0	1	0	1	16	1	0	0	1	0	9	1	0	2	0	0	1	0	0	1
GPS1_ENSG00000169727.7	15554	26348	11524	16251	18453	16025	22704	25680	17040	9794	14717	16718	21486	30404	11636	10960	11854	1483	8830	37314	17013	6922	31796	9448	8310	15474	17354	7130	20625	14897	27747	18914	23553	23696	18322	12477	19091	30020	29403	15206	16427	20481	23292	12250	24606	22153	23178	23548	23953
AC113167.2_ENSG00000249265.1	0	0	0	0	0	0	0	0	0	0	0	0	0	0	0	0	0	0	0	0	0	0	0	0	0	1	4	0	0	0	0	0	0	0	0	0	0	0	0	0	0	0	0	1	0	0	0	0	0
AP002478.2_ENSG00000238060.2	132	145	363	324	199	134	301	137	184	117	457	914	682	180	2078	308	81	14	500	156	83	1269	269	36	196	365	200	206	180	298	318	256	480	470	153	351	207	707	226	299	254	991	225	154	196	213	110	233	140
RP11-697M17.1_ENSG00000249395.2	14	3	3	104	248	487	993	137	4	257	152	16	693	83	26	3	78	2	1834	556	434	447	1	31	2	106	6	182	184	101	0	0	1	175	601	838	2	4	10	27	5	3	4	7	18	348	3	379	5
CICP11_ENSG00000237799.1	87	164	151	90	176	163	190	125	168	106	226	219	136	87	132	139	86	26	153	161	100	152	218	33	95	77	95	10	102	181	93	129	110	144	131	280	119	181	161	158	362	245	238	143	211	162	132	126	347
RP5-1024N4.1_ENSG00000242267.1	25	0	24	30	6	14	10	13	73	14	11	17	20	1	12	7	14	0	26	17	19	25	18	2	17	8	20	0	11	48	4	6	15	11	22	21	7	1	22	26	30	18	7	30	2	9	9	16	21
AL391122.1_ENSG00000243091.1	1	0	0	0	0	0	0	0	1	0	0	0	0	0	0	0	0	0	0	0	1	0	0	2	0	0	0	0	0	0	0	0	0	0	0	0	0	0	0	0	0	0	0	0	0	0	0	0	0
RP11-474N8.5_ENSG00000258442.1	2	2	0	2	3	5	0	0	9	2	2	0	3	0	0	2	2	0	5	0	1	9	4	0	0	0	2	0	5	0	0	1	5	0	6	3	0	4	1	2	0	3	3	0	5	36	4	19	2
HCFC2_ENSG00000111727.7	559	464	224	312	332	277	330	222	759	227	927	307	181	285	109	95	154	40	138	167	172	25	292	143	38	106	295	80	439	317	644	299	553	534	275	225	206	408	320	317	226	264	342	192	246	357	1181	534	366
PTPN20B_ENSG00000183675.10	58	122	168	31	41	85	247	120	5	36	143	112	350	1	163	105	35	8	49	71	8	187	32	127	62	0	6	59	42	56	46	229	150	86	6	118	139	148	225	188	95	224	78	68	2	76	166	243	188
C2orf49_ENSG00000135974.5	905	758	760	834	764	1134	1278	843	1218	847	991	1201	1158	1438	586	869	481	501	914	814	849	625	703	319	223	632	642	1030	928	710	1056	978	1121	820	775	545	1366	1487	993	456	669	914	502	354	850	677	938	943	915
CCDC111_ENSG00000164306.6	403	375	222	346	373	509	441	288	527	315	407	499	292	396	148	194	101	17	154	256	186	130	250	178	98	125	267	148	615	315	360	307	301	391	171	250	570	241	316	255	205	224	262	221	418	478	352	447	301
RP11-127B20.1_ENSG00000250325.1	7	7	0	2	5	8	6	1	6	3	4	1	0	1	7	6	0	0	4	6	4	8	6	14	2	4	9	9	5	4	1	6	3	3	5	5	5	4	9	3	5	3	1	1	8	2	3	7	3
RP11-366L18.1_ENSG00000232918.1	0	3	1	0	1	0	0	0	2	1	0	2	0	0	0	1	5	0	0	0	4	0	3	9	0	0	0	0	1	6	0	0	0	0	0	0	0	0	0	4	5	0	3	1	0	0	0	0	0
AC091981.1_ENSG00000249026.1	35	103	16	25	31	47	48	83	27	21	63	11	39	64	3	16	5	8	4	13	10	11	75	82	1	28	28	34	25	26	119	24	48	116	13	8	95	69	51	18	6	27	44	3	85	71	44	36	61
UBD_ENSG00000213886.3	4975	454	712	389	1616	517	2824	191	198	452	1104	293	3803	157	145	1881	494	245	38	219	497	10	818	4110	430	137	592	19	554	1220	7545	5708	4836	1923	42	201	2241	679	1334	676	262	178	837	139	452	1340	371	3391	4368
RP11-1105G2.4_ENSG00000258172.1	18	9	10	28	22	12	9	5	33	23	13	27	13	1	2	6	12	6	3	13	5	5	10	2	12	8	9	0	12	21	34	11	19	12	19	8	3	15	16	39	22	28	11	2	1	10	10	17	25
SYTL1_ENSG00000142765.12	17137	43754	20248	73801	38204	87150	78781	21847	10511	34861	26578	66836	21369	45761	21950	30171	18907	2865	61802	122173	6657	27296	31739	3380	15904	1076	23018	54182	39556	44091	29240	21788	41867	13697	63711	65586	32747	80145	74230	45827	41335	24543	87514	15940	74819	64547	19755	54451	47151
RAB13_ENSG00000143545.4	17232	13901	15749	16161	17287	18702	12058	14031	14218	22426	15413	12242	11342	9791	13462	12748	8193	5625	7205	18596	9994	8410	24909	31063	7786	5225	8777	17056	17679	10309	23015	26511	20976	11759	16426	4484	20376	11959	10176	5117	3416	6676	11174	11039	10148	10972	11514	13459	15693
AC067945.3_ENSG00000229023.1	74	160	102	66	119	80	217	116	101	58	154	66	203	349	135	36	48	7	54	122	174	36	52	175	47	40	77	42	60	86	128	23	232	157	80	48	105	97	256	78	61	54	57	63	62	110	135	346	217
AC007566.10_ENSG00000244055.1	302	269	433	398	330	398	531	461	483	382	467	398	677	485	516	228	205	24	230	334	499	146	233	116	111	132	189	121	391	489	368	451	575	391	271	306	721	371	456	278	553	502	364	272	296	365	366	378	509
RP11-431M3.2_ENSG00000254033.1	2	0	0	0	2	0	28	0	0	0	0	0	0	0	0	0	2	0	0	1	2	0	0	6	0	1	2	0	0	3	3	1	0	1	0	0	0	0	0	1	0	2	0	0	0	0	1	1	0
RP11-65F13.1_ENSG00000249353.1	593	905	223	446	482	873	1053	1453	621	270	706	363	590	1074	208	196	110	77	138	263	110	181	486	461	135	899	396	420	1123	230	1121	543	731	915	459	86	602	1271	449	272	62	139	375	248	842	649	628	688	665
FOXD4L6_ENSG00000204793.4	22	39	73	65	51	60	147	48	17	39	90	141	174	74	71	126	36	5	178	168	43	209	420	26	92	76	30	43	56	80	29	132	43	27	86	158	58	105	86	82	135	167	72	50	322	57	37	78	57
AC007282.1_ENSG00000240150.1	0	1	0	0	0	0	0	0	0	0	0	0	2	3	0	0	0	0	0	0	1	0	1	0	0	1	1	0	0	0	1	22	0	1	1	0	0	2	0	1	0	0	1	1	0	0	0	4	0
CLEC1A_ENSG00000150048.6	338	179	66	119	177	206	126	37	182	153	123	59	74	18	46	66	91	16	31	52	46	29	144	33	63	15	219	14	61	186	169	73	250	321	40	52	48	33	243	236	264	177	133	188	23	85	292	429	157
AC108463.1_ENSG00000230499.1	19	9	13	14	2	18	18	8	60	46	16	23	27	4	4	12	3	1	3	3	2	7	8	9	2	1	0	0	8	24	12	14	14	9	3	14	8	11	6	0	14	20	9	11	1	6	6	13	13
7SK_ENSG00000202241.1	0	0	0	0	0	0	0	0	3	0	1	0	0	0	0	0	0	0	0	0	0	0	1	2	2	0	0	0	0	0	0	0	0	0	0	0	0	0	27	1	0	0	0	0	0	0	0	0	0
IMPDH1_ENSG00000106348.12	5525	11748	2529	6951	4196	8317	5931	4738	7583	2563	5797	2243	4913	24464	4522	4636	1345	333	2498	18557	2412	2330	12791	3628	1858	1612	2971	1480	6291	4554	10388	4523	12069	9951	10807	3992	6705	11402	5183	6656	6891	7300	5772	2495	15896	10362	6948	6541	17802
AP003461.11_ENSG00000244622.1	6	8	22	14	2	22	5	0	6	35	16	9	12	5	2	8	8	0	6	11	7	0	3	0	8	3	3	5	11	8	21	3	14	7	10	4	3	14	10	9	6	12	5	2	13	9	2	6	10
XXyac-YM21GA2.3_ENSG00000233884.1	0	4	0	4	0	0	1	0	1	0	0	0	7	0	0	1	0	0	0	3	0	0	0	2	0	0	0	0	0	8	0	0	0	0	0	0	0	6	2	4	0	4	0	1	0	1	0	0	0
SNORD38A_ENSG00000202031.1	1238	652	724	942	1457	1453	1178	1618	1698	1144	642	952	578	1035	426	1077	435	165	520	1442	406	403	580	424	423	1070	367	243	1700	500	1205	909	1308	936	1017	251	798	1155	626	503	298	272	673	387	1764	1079	650	1738	1131
RP1-86D1.5_ENSG00000224733.1	70	48	124	33	60	53	70	133	15	128	103	77	138	207	34	31	34	1	60	41	99	49	62	0	31	35	2	26	41	97	93	64	69	80	44	76	67	62	37	13	44	61	47	6	63	25	40	33	59
AC139425.2_ENSG00000233474.2	3	34	0	22	5	3	16	1	8	10	16	5	19	0	2	8	3	0	5	11	5	0	13	0	4	1	3	0	4	7	21	118	10	6	17	6	0	12	20	16	5	28	20	5	5	4	22	14	2
HNF4GP1_ENSG00000228611.1	0	0	0	0	0	0	0	0	0	0	0	0	0	0	0	0	0	2	0	0	0	0	0	6	0	0	0	0	0	0	0	0	0	0	0	0	0	0	0	0	0	0	0	0	2	1	0	0	0
RP11-159F24.4_ENSG00000249855.1	6573	10561	1871	4987	5490	4142	5456	7381	4496	2552	7429	2409	4952	9112	1100	1330	1020	830	753	1008	424	633	4415	4043	949	3333	3358	2509	4506	2508	9732	3109	8892	10432	5198	717	3576	6014	3336	3798	1711	2094	3748	3616	8219	4518	8417	5279	5276
snoU13_ENSG00000238986.1	133	66	110	207	102	203	107	162	139	154	94	140	99	147	167	93	127	53	264	402	240	96	56	56	91	152	149	246	163	145	103	58	105	115	279	258	71	69	104	104	167	88	163	112	159	172	109	149	88
ENTPD6_ENSG00000197586.7	6069	10442	7024	11736	10478	7102	7792	25196	6454	4822	9446	8242	7020	12498	10045	3828	6189	535	10310	10019	32025	5084	14600	1865	9956	5940	3293	3348	14118	11922	16535	19183	13562	23530	6297	15353	10342	12454	20772	6873	18574	29715	24448	7608	17139	12257	10353	15142	15266
CILP2_ENSG00000160161.3	119	989	103	1714	378	534	909	62	301	209	238	520	117	148	11	215	23	4	179	1200	71	52	569	14	44	19	45	12	67	176	3905	2799	486	291	287	70	111	206	160	185	204	91	440	169	327	274	2156	443	722
RP11-144J4.3_ENSG00000214760.2	190	235	106	146	205	213	184	178	177	140	298	139	146	238	81	100	70	19	72	124	101	64	172	90	41	123	92	38	212	103	299	121	222	211	141	71	146	290	217	114	60	93	89	67	241	103	455	213	171
CYP4F32P_ENSG00000223564.1	3	0	1	1	4	11	0	1	0	0	3	0	0	0	0	4	114	0	0	0	0	2	0	0	3	0	0	0	2	0	0	31	0	37	2	7	1	1	0	4	4	1	2	0	10	12	0	0	5
DLGAP1_ENSG00000170579.8	146	113	23	13	40	17	19	5	4	130	55	21	15	4	104	17	8	4	8	10	12	12	43	42	33	10	17	103	5	101	24	84	41	58	11	5	5	18	67	27	67	229	37	70	4	77	66	61	44
KCNJ8_ENSG00000121361.2	534	501	162	565	187	104	239	54	54	255	713	215	142	104	118	80	240	8	36	27	31	36	441	11	29	12	301	23	191	141	582	348	618	739	257	95	85	133	284	140	116	153	180	130	161	191	1135	679	261
LSAMP_ENSG00000185565.6	859	589	783	822	414	324	268	306	78	2654	833	407	404	123	140	329	347	70	124	708	689	153	1176	40	345	106	9034	267	674	343	1437	246	601	376	149	372	543	433	596	436	273	298	605	155	173	445	934	535	520
EIF2B3_ENSG00000070785.12	760	398	343	406	531	1323	704	1066	1234	323	776	598	509	770	342	424	403	40	265	966	386	311	390	196	326	678	524	183	805	676	1032	502	639	794	477	304	304	510	588	560	395	762	511	273	788	936	858	776	498
BZW1P2_ENSG00000198406.6	1599	5970	356	1498	959	1694	4283	2719	1430	841	2400	886	1880	3690	482	706	169	208	329	414	179	463	5221	3873	380	1049	826	2359	1369	609	4975	827	2745	5174	1903	447	2617	2540	1160	748	303	378	956	775	2782	2333	2053	1571	2045
RP11-332P22.2_ENSG00000214147.2	0	0	0	0	0	1	0	0	0	0	0	0	0	0	0	0	2	0	0	0	0	0	0	5	0	0	0	0	0	0	0	0	2	1	3	0	0	0	0	0	0	0	0	2	0	0	1	0	0
SNORD32A_ENSG00000201675.1	1226	1838	508	979	1131	1426	1715	1692	1039	511	836	622	968	3009	251	920	315	245	510	1922	267	449	1562	1088	239	1250	434	336	1888	531	1972	750	1473	1324	2158	220	594	1863	686	484	407	304	553	432	2956	880	986	1107	870
SPOCK1_ENSG00000152377.8	646	1731	153	1557	262	1720	1163	25	435	503	6296	718	344	3778	184	228	62	28	124	302	63	24	875	135	38	88	13832	252	120	329	5039	1017	618	621	3261	144	698	1262	774	169	99	1018	402	231	420	408	4534	313	675
RP11-1415C14.2_ENSG00000250867.2	892	772	1308	1058	1288	1410	1345	891	2715	1223	881	1226	927	881	643	1251	843	108	1244	2903	1157	937	894	86	330	1364	843	215	592	2052	878	1357	617	913	779	947	339	847	1032	1056	822	1326	882	622	1432	718	931	899	916
QRFPR_ENSG00000186867.6	0	0	0	0	0	1	0	0	0	0	0	0	0	5	4	0	6	0	1	3	0	2	2	12	0	0	1	2	17	0	10	0	1	0	3	0	0	0	1	5	9	0	0	0	0	0	4	0	0
PTP4A1P6_ENSG00000254727.1	5	1	6	0	7	5	0	0	2	2	4	16	3	0	5	2	0	0	2	1	3	3	2	0	2	4	5	0	4	6	1	0	1	9	0	1	0	3	8	2	8	4	1	2	0	1	3	2	3
SERPINB6_ENSG00000124570.11	7766	7963	3784	7175	9862	3976	9955	29620	5261	4762	4888	5160	5388	6013	6194	3978	3030	585	1398	12029	10175	1876	6562	4494	3848	6490	5677	2982	9545	5769	9070	2204	9499	5569	3149	4627	10254	2808	6807	3549	5489	4811	8424	2526	4198	8667	5684	7811	8640
ST6GALNAC4P1_ENSG00000233469.1	65	67	81	107	121	77	84	42	122	118	101	125	141	11	136	76	68	0	138	100	188	121	74	4	85	36	67	14	22	118	39	61	47	47	42	144	62	52	158	141	206	174	79	56	10	51	62	75	108
HMGB1P44_ENSG00000248956.1	2	0	2	0	4	0	0	0	1	0	1	1	2	0	9	5	0	0	8	7	2	4	0	5	0	0	0	0	4	0	2	3	2	0	2	0	0	2	0	1	0	6	0	2	2	0	0	2	1
Y_RNA_ENSG00000222579.1	6	16	5	3	8	3	11	18	6	6	18	6	9	3	3	6	1	2	4	2	4	2	16	3	2	5	1	2	13	10	25	3	9	22	4	15	23	7	9	2	7	7	7	2	12	13	7	8	4
AC107027.1_ENSG00000244592.1	0	0	2	1	0	0	0	0	0	0	2	0	0	0	0	1	0	0	0	0	2	0	1	5	0	0	0	0	2	0	0	1	0	0	1	0	0	2	0	1	1	0	0	0	0	1	0	0	0
RP11-414H23.3_ENSG00000251093.1	2	1	0	4	1	7	2	0	6	1	3	15	1	0	0	4	0	4	0	0	0	0	0	0	4	0	0	0	0	0	0	2	0	0	5	2	2	3	2	0	0	1	0	0	0	2	0	1	1
AC103810.2_ENSG00000215769.3	3278	13656	9488	9370	6304	3374	10188	4857	5910	4354	3739	21344	5169	9758	7157	3757	3035	438	5182	6706	9919	1803	3972	360	6280	1539	4771	1208	9531	8820	6405	6574	5671	2343	4836	17106	10307	7620	9286	6271	12450	12885	14340	7408	5805	7723	4136	10985	9505
RP11-329B9.1_ENSG00000229433.1	0	1	8	1	0	3	7	0	3	2	2	6	1	3	4	0	4	0	5	4	6	3	3	2	1	1	0	6	3	2	4	2	0	9	2	4	0	15	2	8	12	4	2	7	10	1	1	13	1
RP11-589M4.2_ENSG00000258802.1	4	0	2	2	4	4	3	1	8	1	5	3	4	0	1	0	1	0	1	1	0	1	0	5	0	0	1	0	1	2	0	0	0	4	2	4	0	3	1	2	4	1	1	0	1	3	3	1	5
AC113389.1_ENSG00000241552.1	0	0	1	0	0	0	0	0	0	0	0	0	0	0	0	0	0	0	0	0	0	0	0	1	0	0	2	0	0	0	0	1	0	1	0	0	0	0	1	0	0	0	0	0	0	0	0	0	0
DUPD1_ENSG00000188716.5	0	0	0	0	0	1	0	2	0	0	1	2	0	0	0	0	0	0	0	0	0	0	0	1	0	0	0	0	0	0	0	0	0	3	0	0	0	0	0	0	0	0	0	0	0	0	0	1	0
RPS26P35_ENSG00000242206.2	10	18	5	5	13	9	9	12	4	7	5	7	5	7	2	4	4	9	4	10	2	2	11	15	1	5	2	4	13	3	16	16	7	23	12	3	5	38	10	9	7	3	9	3	14	21	12	20	27
HJURP_ENSG00000123485.5	230	1157	233	286	236	694	1494	1180	270	489	142	369	206	861	380	476	110	82	571	728	644	418	185	577	124	900	76	161	228	423	321	592	523	670	352	619	977	585	344	367	207	459	346	107	1114	856	137	961	506
RP11-25C19.3_ENSG00000233340.1	55	51	46	51	81	17	30	46	68	66	42	26	78	55	62	51	40	2	24	50	38	52	45	25	11	41	28	34	46	62	43	43	44	27	54	55	49	78	47	37	48	54	36	25	26	26	43	50	46
RP11-1094H24.4_ENSG00000246640.1	43	184	61	98	46	150	250	17	117	26	42	228	97	245	25	111	20	10	427	113	20	20	67	8	19	4	7	3	57	61	38	16	51	52	70	84	93	616	62	30	61	68	22	19	15	68	31	32	65
RP11-1C1.1_ENSG00000244361.1	0	2	1	1	0	1	1	0	2	0	0	0	2	3	1	1	2	0	0	4	0	0	1	2	0	0	0	0	1	0	0	0	0	1	0	2	2	0	0	0	3	1	0	0	0	1	0	2	1
PRHOXNB_ENSG00000183463.4	2	1	2	0	2	0	0	1	2	0	0	0	0	0	1	2	0	0	0	0	0	0	0	0	0	124	0	0	0	0	0	0	0	0	0	2	1	0	1	0	0	0	0	0	0	0	0	0	0
Y_RNA_ENSG00000252652.1	25	25	11	21	16	18	27	17	10	15	40	21	20	29	17	4	4	2	5	4	15	7	16	26	11	9	8	21	22	13	33	16	35	34	12	12	22	29	23	17	17	11	23	12	36	18	33	23	12
5S_rRNA_ENSG00000223019.1	0	0	0	0	0	0	0	0	0	0	0	0	0	0	0	0	0	0	0	0	0	0	0	0	0	0	0	0	0	0	0	0	0	0	0	0	0	0	0	0	0	0	0	0	0	0	0	3	0
RP11-163E9.2_ENSG00000239969.1	1115	809	1624	1585	914	2168	2083	799	1166	1241	1434	2401	2988	2245	1444	1861	922	367	1283	3202	3662	1348	1442	73	1635	1021	1210	1131	1260	2280	755	2289	1572	1129	1457	2226	2766	1555	1440	1709	1614	2906	1334	1136	1355	844	1196	1740	1659
RP11-725G5.3_ENSG00000258615.1	188	73	283	117	255	76	192	170	39	267	119	106	76	60	231	217	229	209	181	375	356	156	141	49	169	117	152	264	230	170	156	46	150	92	82	183	168	112	177	76	84	116	156	72	162	153	26	124	172
TGFB1I1_ENSG00000140682.12	3291	8565	1536	7904	1981	5689	5205	399	4974	2856	10389	2296	3081	5735	2077	1971	513	125	805	2691	1653	466	7956	1001	980	557	1934	141	2060	3663	15600	7003	4924	3774	8024	1339	6106	5258	4646	2308	2405	7869	5652	3001	2028	2749	34098	3563	4378
HOOK2_ENSG00000095066.6	4692	4424	9876	11942	8841	6255	8762	5284	6117	6222	8363	14832	7635	11430	14324	4843	8478	2204	15632	14437	12912	13672	4606	2024	6938	4334	3431	7647	6211	9681	6918	9124	5092	5175	12135	13055	5770	6941	8317	6385	9417	8283	16746	5752	12819	6794	3720	6494	8478
U6_ENSG00000202186.1	0	0	0	0	0	0	0	0	0	0	0	0	0	0	1	0	0	1	0	0	0	1	0	1	0	0	0	0	0	0	0	0	0	0	0	0	0	1	0	0	0	0	0	0	0	0	0	0	0
RP11-365O10.1_ENSG00000256283.1	6	5	1	1	1	15	12	6	3	4	9	2	6	15	9	3	2	2	3	7	1	4	3	2	6	3	1	2	11	4	3	2	13	8	6	2	0	6	4	4	3	4	1	1	5	6	7	10	9
RP11-371I1.1_ENSG00000215149.3	17	55	11	9	7	15	21	52	4	6	20	7	34	24	6	21	3	0	11	13	4	3	26	40	7	22	0	3	30	7	27	12	22	86	5	7	52	40	31	2	3	2	15	3	59	32	6	37	45
AC090099.2_ENSG00000224002.1	38	15	6	24	9	553	8	21	58	1	26	4	46	266	4	17	1	4	1	3	4	10	15	4	11	3	1	3	23	10	40	88	164	9	16	2	28	54	29	7	20	13	1	9	19	24	23	182	50
RCBTB2_ENSG00000136161.7	884	526	553	397	696	540	552	375	1426	563	834	738	772	135	454	318	195	26	283	217	308	201	383	388	189	75	485	66	656	699	1096	608	949	663	266	438	712	299	562	503	470	925	486	511	160	569	956	643	589
SNORD121A_ENSG00000238886.1	18	28	11	26	10	15	31	30	20	18	24	14	15	25	13	10	12	3	13	15	10	16	22	25	11	20	13	38	37	20	27	22	25	27	30	45	29	31	12	19	39	11	22	12	23	32	26	25	11
RP11-397M16.4_ENSG00000197161.6	1	0	0	0	0	0	6	0	1	0	0	0	0	0	0	0	0	0	0	0	0	0	0	18	0	0	0	0	0	0	0	0	0	0	0	2	0	0	0	0	0	0	0	0	1	0	0	0	0
OR52E2_ENSG00000176787.2	0	0	0	2	0	0	0	0	0	0	0	0	0	0	0	0	1	1	0	0	1	0	0	10	0	0	0	0	4	0	0	0	2	0	0	0	0	0	0	0	0	0	0	0	0	0	0	0	0
RP3-323N1.2_ENSG00000230322.1	24	10	0	13	21	7	6	22	43	42	42	1	20	10	4	0	2	0	0	4	6	12	28	6	9	11	4	0	7	2	12	2	23	14	12	2	2	2	14	33	2	5	11	12	0	6	80	20	12
CTC-459M5.2_ENSG00000251187.1	354	207	255	121	264	132	328	67	340	255	169	372	295	156	281	185	174	131	349	240	171	197	130	50	98	39	394	220	236	452	263	229	267	276	56	223	192	279	253	62	230	151	158	213	27	220	121	122	127
AC016561.1_ENSG00000236068.2	1	0	1	0	4	2	3	0	2	0	0	0	0	0	0	0	1	0	1	0	0	0	0	8	0	0	2	0	1	4	0	0	0	0	2	0	0	0	1	1	0	2	1	0	0	1	2	4	0
5S_rRNA_ENSG00000222268.1	12	34	19	23	31	50	47	18	20	15	40	24	16	11	15	6	14	2	20	23	33	15	15	32	13	13	9	6	17	34	20	12	26	28	23	18	23	25	33	30	25	46	35	8	19	20	35	20	12
RP11-473C19.1_ENSG00000257458.1	7	0	3	5	3	4	1	0	11	1	20	0	0	0	0	5	5	0	18	2	5	0	2	2	0	0	1	0	6	5	1	0	3	5	0	0	0	1	1	16	15	4	0	4	0	3	18	4	4
7SK_ENSG00000199719.1	7	7	8	6	5	6	7	9	22	6	19	25	4	9	3	3	5	0	6	3	6	1	8	0	4	2	0	0	2	5	5	12	4	11	5	9	1	19	5	6	16	11	7	3	4	3	10	2	3
SNORA7_ENSG00000222604.1	3	5	2	0	4	1	10	1	5	6	7	6	2	0	0	3	0	0	2	2	2	2	4	1	1	4	0	2	4	7	5	1	0	6	1	1	4	5	2	3	0	1	2	0	5	2	3	2	5
AL591704.9_ENSG00000203781.4	0	0	0	0	0	0	0	0	0	0	0	0	0	0	0	0	0	0	0	0	0	1	0	3	0	0	0	0	0	0	0	0	0	0	4	0	0	0	0	0	0	0	0	0	0	0	0	0	0
ELOVL4_ENSG00000118402.5	340	41	51	86	58	79	24	7	41	88	159	35	19	0	15	14	59	5	8	17	12	6	49	12	1	4	178	0	74	16	72	85	80	103	111	14	16	45	50	43	22	57	72	50	20	53	221	125	77
RP11-654D12.2_ENSG00000258216.1	0	1	0	0	0	1	5	0	0	0	1	0	0	0	1	7	0	0	1	0	0	1	4	1	0	0	0	0	0	0	0	0	0	7	0	2	0	0	0	1	5	1	0	0	0	0	0	1	2
RP11-560A15.3_ENSG00000203266.2	4	1	6	4	3	2	2	3	5	2	0	3	4	2	4	3	1	0	4	5	2	5	0	3	1	0	0	1	3	1	2	4	3	2	2	1	0	1	3	1	3	2	1	2	5	0	0	0	2
SULT1C3_ENSG00000196228.2	3	0	3	1	4	1	2	27	0	4	0	2	3	1	3	0	0	0	3	8	0	3	6	17	0	24	0	0	5	0	1	0	5	3	0	4	23	0	1	4	0	2	4	0	4	2	5	5	7
RP11-474B16.1_ENSG00000257642.1	10	4	11	0	3	2	7	5	5	0	16	3	3	0	4	0	3	2	1	1	6	1	4	4	4	5	0	0	1	16	1	10	1	43	5	3	2	16	29	6	11	16	2	7	14	3	8	15	6
RP3-388N13.3_ENSG00000254057.1	5	10	5	5	5	6	10	4	3	3	19	15	12	2	28	6	10	1	16	32	1	14	12	5	1	16	8	4	10	8	5	5	9	19	12	8	0	76	13	11	12	17	10	3	2	4	9	12	16
OR8G5_ENSG00000255116.1	0	0	0	0	0	0	0	0	0	0	0	0	0	2	0	0	0	0	0	0	0	0	0	3	0	0	0	0	0	0	0	0	0	0	0	0	0	0	0	0	0	0	0	0	0	0	0	0	0
CTAGE9_ENSG00000236761.4	270	45	1050	968	580	1167	671	870	485	3130	822	1788	1111	1910	2018	1008	500	131	559	1085	578	1199	4250	98	1836	771	364	599	1215	1532	396	1332	1633	1577	1487	3791	718	2406	1972	584	1178	2555	1891	609	2103	2744	578	1885	909
U1_ENSG00000239023.1	0	0	0	0	0	0	0	0	0	0	0	0	0	0	0	0	0	0	0	0	0	0	0	0	0	0	0	0	0	0	0	0	0	0	0	0	0	0	0	0	0	0	0	0	0	0	0	0	0
RP11-471M2.2_ENSG00000223404.1	0	0	7	0	0	0	2	0	0	0	0	38	0	8	0	0	0	0	0	0	0	1	1	7	5	0	0	0	0	0	6	76	0	0	0	1	0	8	0	0	0	0	0	0	0	0	0	0	0
AC135983.1_ENSG00000221318.1	19	6	3	21	19	13	8	2	22	6	22	20	12	6	10	9	16	0	10	11	4	9	9	2	2	3	6	8	4	6	9	9	7	7	14	10	10	16	13	15	38	20	8	13	10	9	7	14	11
PTPN22_ENSG00000134242.10	456	218	509	854	799	187	490	287	719	795	869	425	718	128	183	1018	136	47	83	257	217	54	156	100	307	69	198	41	598	718	372	266	916	221	89	198	485	186	883	960	624	2024	237	298	270	574	164	702	673
AC103563.2_ENSG00000231331.1	0	0	0	0	10	0	1	0	0	0	0	0	0	0	0	0	0	5	0	0	0	0	3	3	0	0	0	0	0	0	3	0	0	8	3	0	2	0	5	0	0	0	0	1	0	0	2	5	3
RP11-308K19.2_ENSG00000215227.4	6	0	0	3	2	3	0	0	18	2	6	4	1	1	1	4	1	0	2	1	2	1	0	0	2	0	3	0	0	2	3	14	11	4	1	2	0	3	2	6	7	6	5	6	2	0	2	4	6
snoU13_ENSG00000238351.1	20	38	18	40	33	41	17	27	33	25	23	18	13	41	22	13	15	0	23	13	24	16	9	5	10	4	6	8	11	27	23	20	16	22	71	13	8	20	16	24	24	17	20	13	19	11	22	27	10
KARSP1_ENSG00000229696.1	12	5	1	6	4	18	3	7	11	3	12	15	8	5	0	5	0	1	3	4	4	8	19	11	3	8	5	1	1	19	7	12	9	11	1	13	1	16	5	8	0	17	1	0	4	4	11	17	3
ESD_ENSG00000139684.8	2577	1935	649	855	1641	2726	1562	2069	1907	1005	1941	1007	1625	1597	539	482	354	115	216	791	244	167	2021	1502	176	1695	878	239	3112	650	2415	1448	2274	1654	696	254	2171	1927	1030	754	312	482	677	432	743	1920	2263	1461	2210
RP11-320N21.2_ENSG00000254248.1	4	10	21	13	7	13	23	20	16	14	15	5	13	6	12	34	9	0	44	11	18	15	4	3	25	8	3	1	15	22	3	20	18	7	25	24	10	16	13	20	27	25	1	2	9	2	5	10	3
AC091633.3_ENSG00000223711.1	13	2	2	1	5	8	4	0	15	2	14	1	10	1	4	3	2	2	2	1	0	1	1	12	0	0	69	1	3	10	3	0	8	1	8	0	0	4	0	7	6	3	3	1	1	4	2	2	2
ARID3C_ENSG00000205143.2	3	21	6	5	5	0	6	3	5	0	1	2	1	1	2	14	4	4	2	6	1	2	0	7	0	8	0	0	0	4	2	5	8	3	7	4	2	7	2	4	7	0	4	2	22	6	2	4	4
RP11-576C12.1_ENSG00000250068.1	25	15	27	41	15	24	32	26	30	33	33	20	29	22	12	32	35	2	73	38	26	67	18	24	19	18	17	5	14	40	21	41	43	30	3	53	30	16	21	24	30	28	28	3	37	17	26	23	35
RP11-80G7.1_ENSG00000251018.2	29	74	29	25	40	100	150	93	27	40	21	19	23	57	12	30	18	39	41	64	41	87	10	9	18	158	17	61	71	25	23	37	52	64	16	15	80	52	32	28	4	9	29	9	82	96	9	136	51
AC007969.4_ENSG00000234061.1	0	4	0	4	1	1	7	5	0	1	1	0	2	2	1	1	1	1	0	1	0	4	3	1	0	5	1	0	0	0	6	1	2	2	3	0	4	1	0	5	1	5	0	2	1	3	3	1	2
POLR1A_ENSG00000068654.10	1403	2062	734	1047	1225	1738	2088	2853	1640	987	2344	1563	1730	3339	772	924	747	108	629	1333	859	1032	2309	1253	759	1418	1418	854	1887	974	3198	1106	1773	4608	1391	1146	1531	4946	1410	1951	1491	2251	2028	573	3844	1765	3317	2456	1933
RP11-560B16.5_ENSG00000254712.1	54	9	6	20	206	4	227	22	40	47	4	48	17	17	32	15	84	73	222	206	19	159	0	11	0	59	7	5	22	64	19	32	72	9	51	125	73	7	9	18	10	12	27	24	26	15	8	130	33
AD001527.1_ENSG00000105261.4	16	23	21	8	35	20	60	34	36	15	27	68	60	54	18	62	9	6	26	33	40	27	37	8	16	34	12	0	18	29	15	25	22	28	39	23	37	114	55	63	3	79	19	9	84	17	19	24	45
PRKCA_ENSG00000154229.6	1438	2924	1941	1089	1826	715	1729	2139	1381	1232	1884	1341	1274	1172	992	1003	532	165	1044	1610	1701	2586	2404	1437	594	765	305	1343	1385	1537	1727	1222	972	2663	2056	2496	3950	1249	1050	969	1549	1927	1390	394	2741	2160	1794	1836	2212
SEMA4A_ENSG00000196189.6	887	2265	891	1869	2012	3637	2550	902	1616	803	1894	1609	928	3563	1330	2340	785	96	791	1076	1029	383	1017	990	821	264	453	602	2549	1130	4271	3296	1171	2673	1727	1342	800	4165	1409	1634	1985	3113	1341	529	2059	1138	1180	1350	2023
SP1_ENSG00000185591.5	4849	9793	5912	5668	5430	3834	8736	5791	5618	4129	6181	6646	7367	6728	8551	4425	1340	434	3852	5542	1762	2328	7558	3240	1807	2577	5469	2915	7289	5496	9127	4295	7160	7828	3389	5426	4684	8070	7290	3669	5625	8845	5032	2124	6942	8992	5289	7752	5415
CTD-3179P9.2_ENSG00000250427.1	21	5	12	11	15	6	11	5	7	5	6	10	16	9	7	3	5	0	11	17	9	10	8	6	6	7	26	2	4	9	5	5	6	8	7	3	5	9	5	12	7	8	6	18	14	1	4	11	17
UVRAG_ENSG00000198382.4	1822	1997	993	1121	1679	1758	1233	1089	1792	1261	1898	1078	1669	1945	591	1076	458	228	562	1016	932	285	1250	1418	542	587	814	430	2012	1076	2484	1263	2121	1916	818	1073	1800	2378	1619	1727	957	1129	1174	679	1174	1688	2117	1399	1776
RP4-671G15.2_ENSG00000249913.1	92	27	88	90	48	42	65	62	87	128	120	71	80	83	104	49	59	19	71	72	101	71	57	67	46	44	55	114	93	91	139	71	98	50	37	56	93	64	61	27	30	90	60	32	36	63	56	76	79
XX-C2158C6.2_ENSG00000219814.2	88	29	26	49	30	63	61	25	45	41	57	38	51	58	18	29	32	4	38	52	13	19	27	22	12	22	53	20	56	52	34	38	34	72	124	9	33	32	33	18	26	33	29	29	50	31	54	53	59
ATP5LP5_ENSG00000242561.1	0	0	0	0	0	1	0	0	0	0	0	0	0	0	0	0	0	0	0	0	0	0	0	0	0	0	0	0	0	0	0	0	0	0	0	0	0	0	0	0	0	0	0	0	0	0	0	0	0
ZNF587_ENSG00000198466.5	9271	5900	14938	7089	7711	12448	21080	9738	12353	12046	14655	17420	16876	16141	20660	11155	4431	1798	16971	9684	17601	9044	8543	1145	4915	9861	6333	4509	6862	11553	7666	9519	8247	7379	8027	8201	6506	8800	10742	4993	9883	12918	8262	3092	9308	8481	6096	7355	8701
RP1-239B22.1_ENSG00000188211.4	514	259	504	188	811	271	440	409	478	232	514	345	644	443	134	110	182	13	96	202	599	267	421	139	86	289	61	32	599	332	406	708	360	489	105	288	795	405	277	419	564	292	276	105	318	423	430	393	464
ZNF863P_ENSG00000236538.1	1	3	0	0	0	2	1	1	1	0	0	0	0	0	0	0	2	0	0	0	0	0	0	8	0	0	0	0	1	0	0	0	0	0	1	0	0	0	0	0	1	0	0	0	0	0	0	0	0
RP11-382E9.1_ENSG00000231718.1	4	0	0	0	2	2	0	0	0	4	2	0	0	0	0	0	0	0	0	0	1	0	2	49	0	0	0	0	0	2	0	0	0	0	4	1	2	0	0	0	1	0	0	4	0	2	2	1	0
RP11-432M8.11_ENSG00000250386.1	0	0	0	0	0	0	2	0	0	0	0	0	0	0	0	0	0	0	0	0	0	0	0	5	0	0	0	0	0	0	0	0	0	0	0	0	0	0	0	0	0	0	0	0	0	0	0	0	0
FAM90A17_ENSG00000223535.3	73	16	22	30	78	10	10	4	43	12	17	51	9	3	12	15	6	12	56	30	7	4	10	6	17	4	57	4	38	41	16	50	18	20	4	10	38	7	34	24	13	66	16	11	31	19	15	27	91
AL020993.1_ENSG00000241693.1	78	334	42	93	45	161	73	129	51	91	167	90	78	204	62	26	38	7	29	35	34	46	176	63	16	24	27	43	113	64	288	56	120	286	163	52	78	140	85	101	82	110	72	50	265	84	267	121	113
RP5-1007M22.2_ENSG00000231999.2	107	38	59	40	66	68	60	73	112	63	79	68	73	46	26	57	40	0	53	55	32	12	55	24	38	18	78	23	56	76	122	34	109	172	24	70	59	42	74	121	48	57	29	16	81	70	50	91	75
SLC25A47_ENSG00000140107.10	3	9	7	6	8	3	17	8	5	2	7	5	2	2	8	12	1	3	5	7	2	2	8	5	9	20	0	4	27	1	10	0	22	17	16	6	32	11	4	24	0	27	1	0	5	28	3	6	6
ABCE1_ENSG00000164163.6	2203	3355	1251	1768	1821	3768	2777	2293	3063	1826	2620	2525	1787	2960	1084	1121	840	154	1097	1134	1246	897	1297	3526	795	863	1002	1344	4416	1943	3730	2097	2587	3059	1798	1385	2224	2461	1539	1561	1234	1245	1536	989	3099	2597	2420	2455	1672
CTD-3179P9.1_ENSG00000249797.1	18	2	3	1	1	1	0	0	1	1	0	0	1	0	5	0	2	0	4	0	3	2	1	10	3	3	12	0	1	1	0	0	6	1	2	0	2	0	2	2	2	0	2	8	0	2	5	16	7
OR6A2_ENSG00000184933.3	7	0	0	0	8	0	10	0	8	0	1	4	0	5	0	4	1	0	1	0	0	3	0	4	0	6	1	0	0	4	1	0	2	0	3	2	2	0	0	2	0	0	0	0	0	0	3	6	0
RP11-316P17.2_ENSG00000237372.1	3	0	2	0	5	0	6	4	0	6	0	0	6	0	0	2	1	4	0	2	3	4	3	0	0	0	0	0	2	0	2	4	2	0	0	0	0	5	10	6	5	2	6	0	2	5	0	21	3
RP4-805N21.1_ENSG00000227868.1	3	0	5	2	3	4	1	0	3	1	6	4	0	1	8	1	3	0	7	15	7	2	0	3	0	2	8	2	1	5	2	1	0	0	10	2	0	3	2	4	9	6	0	0	2	2	2	5	4
AC139495.1_ENSG00000250552.1	2111	1468	2748	2262	2379	2871	3111	1893	6046	2716	1922	3056	1836	1800	1424	2332	1834	192	2673	4587	2282	2269	1547	381	751	2381	2361	357	1372	4286	1574	2888	1359	1841	1522	2040	726	1617	2032	2204	1620	2516	1720	1375	2627	1591	1668	2110	1769
AP000233.3_ENSG00000223870.1	0	0	0	0	0	0	0	0	0	0	0	0	0	0	1	0	0	0	0	0	1	0	0	0	0	0	0	0	0	0	0	0	0	0	0	0	0	0	0	0	0	0	0	0	0	0	0	1	0
OR10G2_ENSG00000255582.1	0	0	0	0	0	0	2	0	1	2	0	0	0	0	0	0	6	4	0	0	0	0	0	18	2	0	1	0	0	0	0	0	0	0	2	0	0	0	0	6	0	1	0	0	0	0	0	0	0
AC005033.6_ENSG00000233872.1	1	0	0	0	0	0	0	0	5	0	0	2	0	0	2	6	0	0	2	0	1	2	0	0	2	0	0	0	0	0	0	0	0	20	9	4	0	0	15	4	6	0	0	0	0	8	0	0	2
AB019441.29_ENSG00000225200.2	349	298	221	298	441	434	348	381	538	413	240	328	179	359	116	346	149	41	158	509	154	123	227	137	133	334	151	84	683	199	451	342	469	363	372	99	338	365	210	161	116	92	217	119	581	373	215	535	377
SOD3_ENSG00000109610.4	4672	1663	1482	1824	3683	544	1686	1481	1497	587	7591	977	1865	545	960	1073	1772	299	527	3314	285	295	2382	445	235	594	515	39	1129	688	3326	2707	3158	8950	862	592	1005	1697	2380	553	1528	1670	3646	941	456	1302	11765	7923	3980
KRT78_ENSG00000170423.7	83	1149	27	47	3	179	57	473	6	0	36	97	50	106	8	306	12	5	134	336	9	1	319	168	5	3	0	3	168	4	77	42	166	270	1155	44	270	702	138	26	20	8	2	35	137	1209	59	79	290
SFN_ENSG00000175793.9	4625	10932	3053	15885	1864	29206	14075	15122	2163	5635	1987	4386	9685	11850	2228	6346	299	765	4886	18417	1012	1135	15181	4842	1580	12748	181	4239	16424	5362	7049	3996	17868	17699	41035	2423	23554	27779	10836	2100	1828	1355	8997	780	24499	18388	3246	16512	12311
CRYZL1_ENSG00000205758.6	1244	1169	827	1333	1242	1866	1011	516	1220	922	1552	1310	1779	1616	762	939	561	114	725	915	862	363	727	272	550	362	798	373	1202	1156	1130	1647	1640	908	964	1003	1335	986	1487	1158	981	1411	913	617	473	1285	1507	1241	1385
IL6STP1_ENSG00000227018.1	8	3	2	2	2	1	3	3	7	7	7	2	5	0	2	2	2	1	0	3	0	0	3	6	0	0	5	0	0	1	2	4	4	11	2	2	1	2	6	4	9	0	3	4	2	1	12	3	2
MAP2K1P1_ENSG00000254013.1	11	25	1	9	12	17	11	12	6	2	13	2	22	5	0	14	4	1	4	0	2	3	26	10	2	4	11	4	15	6	21	9	12	22	22	2	11	21	5	10	5	2	17	3	31	16	18	6	8
RP1-228P16.5_ENSG00000257955.1	0	0	0	0	0	0	1	0	0	0	0	0	0	0	0	4	0	4	0	0	0	0	0	4	0	0	0	0	0	0	0	1	0	0	0	0	0	0	0	1	0	0	0	0	0	0	0	0	0
SNX18P3_ENSG00000225345.2	134	212	185	223	208	150	154	157	17	214	215	282	220	117	895	101	195	5	100	190	124	452	191	4	119	126	1	115	213	321	130	281	44	123	70	382	126	151	223	191	613	701	357	146	295	502	128	245	203
AL137139.2_ENSG00000255768.1	91	21	33	54	126	101	46	155	66	59	65	67	65	31	167	33	54	107	43	86	41	162	66	64	42	141	44	101	108	48	76	71	65	75	50	41	71	36	27	60	32	57	59	26	45	39	84	70	54
DEFB114_ENSG00000177684.3	0	0	0	0	0	0	0	0	0	0	0	0	0	0	0	0	0	1	1	0	0	0	0	8	0	0	4	0	0	0	0	0	0	0	0	0	0	0	0	0	0	0	0	0	0	0	0	0	0
NDUFS8_ENSG00000110717.6	6252	8266	6568	7136	7592	13410	7574	11995	7770	4404	7993	6590	7434	9622	3745	10780	4755	700	9466	22628	6761	6564	13268	2758	3721	8515	4068	4960	8927	7143	8526	10307	11809	7136	6650	4789	10537	16432	10755	6800	8280	10246	6824	3279	7489	10086	8999	7651	9056
RP11-206L10.2_ENSG00000228327.2	771	361	920	488	1270	1055	915	550	1492	1088	1296	1045	916	921	459	336	281	67	1008	1048	1167	726	500	168	546	467	457	467	660	573	280	479	622	649	564	837	498	746	474	547	625	886	502	459	599	333	418	653	745
RP11-2O17.2_ENSG00000248529.1	1	0	1	1	0	0	0	1	6	0	0	2	1	0	0	0	0	2	1	2	0	1	0	11	0	0	3	0	0	0	0	0	5	0	1	0	1	0	0	0	0	5	0	7	0	0	1	0	2
RP11-379K17.4_ENSG00000239219.1	8	2	4	1	11	7	9	0	12	6	23	2	4	5	6	1	2	3	1	6	1	1	4	16	3	3	1	3	4	4	1	1	7	6	0	1	5	1	1	2	0	20	5	10	6	5	24	5	4
RP11-517P14.2_ENSG00000230555.1	47	37	4	12	24	38	28	35	56	10	41	22	22	39	16	13	11	1	2	28	7	4	36	8	3	19	29	0	53	10	35	40	47	53	12	4	11	63	25	13	10	13	32	11	32	23	42	26	53
FAM116B_ENSG00000205593.5	2770	5903	2192	7963	3619	6953	3329	1897	1554	4065	2360	7410	2287	3352	3464	5371	3374	313	4675	12246	3668	2448	3545	277	2687	803	1542	3727	4767	5476	4254	5517	3087	3711	7053	5627	4211	4136	8351	3582	7388	9010	6267	3054	5019	3630	2587	4336	4312
U6_ENSG00000223287.1	9	2	1	6	8	9	3	3	1	9	0	16	4	12	6	4	3	1	8	6	5	39	4	0	6	10	77	6	9	10	2	11	0	5	0	19	1	14	5	9	1	8	16	9	0	1	2	12	25
AC097526.10_ENSG00000242544.1	0	0	0	0	0	0	0	0	0	0	0	0	0	0	0	1	0	1	0	0	0	0	0	1	0	0	0	0	0	0	0	0	0	0	0	0	0	0	0	0	0	0	0	0	0	0	0	0	0
ITGAV_ENSG00000138448.6	8483	9433	1943	2979	2325	10235	7024	1595	7780	6133	12469	4351	4430	8495	1419	4365	1017	275	1606	2435	1391	757	6471	927	842	505	1775	331	2988	3997	14264	5390	6438	10950	3856	2648	4655	8230	3948	2719	1640	2414	2058	1204	4306	5116	12734	3841	5174
OTOGL_ENSG00000165899.6	226	13	99	29	15	12	14	2	6	3	308	77	4	10	7	19	108	6	48	4	4	2	29	64	0	28	61	1	266	68	183	10	137	67	13	382	0	23	23	342	151	13	183	58	1	98	147	227	79
OR5M6P_ENSG00000254603.1	0	0	0	0	0	0	0	0	0	0	0	0	0	0	4	0	0	0	47	0	2	0	0	12	0	0	1	0	0	0	0	0	0	0	0	0	0	0	0	0	0	0	0	0	0	0	0	0	0
U6_ENSG00000201641.1	0	0	0	0	0	1	0	0	0	0	0	0	0	0	1	0	0	0	0	0	0	0	0	0	0	0	1	0	0	0	0	0	0	0	0	0	0	0	1	0	0	0	0	0	0	0	1	0	0
SCFD1_ENSG00000092108.15	2271	2115	1346	1230	1855	1642	4368	2778	2005	1738	2402	1935	2205	5733	1362	958	572	167	1682	1232	956	528	1341	1605	496	1445	1158	1059	2707	1286	3074	1482	2152	2514	1350	1187	2972	2550	1485	1509	2129	1093	1274	802	2107	2125	1805	2276	1855
Y_RNA_ENSG00000206806.1	0	0	0	0	0	0	0	0	0	2	0	0	0	0	0	0	0	0	0	1	0	0	0	2	0	0	0	0	0	0	0	0	0	0	3	0	0	0	0	0	0	0	0	0	0	0	0	0	0
AC095047.1_ENSG00000240942.1	4	0	0	2	0	1	0	2	2	0	1	0	1	4	0	1	0	0	1	0	0	0	0	2	0	0	0	0	1	1	0	2	0	1	2	5	0	2	1	0	0	1	0	0	0	0	0	2	0
LAP3_ENSG00000002549.7	1943	2450	1032	1009	2474	2063	2638	3301	2933	678	2805	883	2794	2187	768	897	357	212	263	1806	824	345	2031	4317	628	606	1283	829	2724	1612	4517	808	5181	3505	1054	566	1283	1224	2858	1444	625	906	1307	1320	3131	5017	3249	5145	2494
PRPF40A_ENSG00000196504.10	9959	6562	9045	9347	11031	15378	16502	11923	10993	11619	7857	10767	13488	19210	13830	8510	4796	3876	10461	15089	12127	9979	9329	6094	5742	13915	7273	15062	13754	6539	13477	10104	15645	11594	11509	6671	13604	12347	9518	6241	4242	5754	7569	4586	12124	15267	5859	14912	9933
AC091978.2_ENSG00000242929.1	4	0	0	0	0	0	0	1	0	0	2	0	2	0	0	0	0	0	0	0	0	0	0	5	0	0	1	0	1	0	0	0	0	0	1	1	3	3	0	1	1	0	0	1	0	1	1	0	0
C22orf33_ENSG00000185264.7	2	0	0	1	0	0	0	0	0	0	0	0	2	1	0	0	0	2	0	2	0	0	0	6	0	0	1	0	0	0	0	0	0	0	0	0	0	1	1	1	0	0	0	0	0	0	1	0	0
AL592205.1_ENSG00000212039.1	0	0	0	0	0	0	2	0	0	0	0	0	0	0	0	0	0	0	0	0	0	0	0	0	0	0	0	0	0	0	0	0	0	0	0	0	0	0	0	0	0	0	0	0	0	0	0	0	0
CHRNB2_ENSG00000160716.4	659	36	272	46	69	53	97	35	27	13	457	85	127	17	40	67	329	2	9	48	28	8	94	2	34	31	151	2	510	69	250	60	283	222	22	81	38	78	122	335	153	96	372	82	18	218	323	418	220
RP3-467K16.4_ENSG00000228140.1	19	102	69	52	33	72	126	19	46	53	58	105	131	16	38	125	6	11	35	259	20	57	19	33	12	23	6	4	55	67	8	33	52	23	12	42	58	43	90	268	24	52	36	1	98	194	19	25	79
CTD-2265D6.1_ENSG00000248873.1	104	61	46	84	63	132	135	186	101	50	100	51	86	69	35	63	25	18	47	126	37	30	74	156	44	118	46	53	105	23	167	82	166	109	87	20	99	71	48	38	15	71	50	23	173	149	88	108	80
RP11-29B11.2_ENSG00000238172.1	139	243	143	155	182	234	239	295	240	113	130	122	128	285	66	214	74	37	83	189	99	107	135	66	26	169	57	38	324	86	277	260	336	221	201	57	246	346	141	69	60	89	155	64	260	228	127	216	196
RPL23AP1_ENSG00000239257.1	108	214	190	200	224	131	243	63	109	403	173	251	669	140	43	90	52	7	226	261	183	49	128	21	106	66	83	43	135	133	376	126	545	440	92	117	609	150	319	325	112	134	187	51	106	735	104	448	393
MYCBP2-AS2_ENSG00000229521.1	45	18	14	9	19	27	32	27	45	32	28	21	34	18	17	17	17	0	8	19	19	9	15	14	22	10	19	2	28	32	40	14	38	43	11	11	14	19	26	41	11	31	13	7	26	24	24	34	21
MIR1276_ENSG00000221634.1	8	4	3	7	7	7	9	11	3	2	6	3	9	6	1	6	0	0	1	5	2	3	36	2	2	3	5	5	5	4	4	2	6	2	6	5	10	13	10	4	6	15	6	2	19	17	3	5	15
MBL2_ENSG00000165471.5	1	2	0	2	0	0	0	0	0	0	0	0	0	0	0	0	0	2	1	4	0	0	0	29	0	0	0	2	2	8	4	2	2	0	4	0	2	6	0	2	1	0	0	0	0	0	0	4	0
GOLGA8B_ENSG00000215252.4	37360	12696	23471	40183	34634	58931	40546	14666	27385	36619	39057	37305	45181	41314	30057	22564	61033	17913	34037	37556	71402	96642	15396	1136	36970	31861	26596	53841	23903	44553	13001	22693	38839	31744	57583	47464	19886	13080	26472	46203	41919	23467	54289	21686	20808	34129	16872	42965	22549
RNF157_ENSG00000141576.8	1795	1282	603	401	1400	217	1112	458	511	282	1193	488	921	908	139	103	688	22	724	1548	145	351	2305	600	132	2646	963	39	868	912	1089	1635	853	1938	152	376	646	776	458	1102	518	700	669	535	618	1511	2183	2088	1139
CCDC96_ENSG00000173013.4	123	153	83	164	147	225	158	150	97	25	173	79	178	80	60	159	62	14	24	1036	22	58	262	48	48	29	70	131	652	49	200	103	240	164	86	48	153	192	190	53	25	47	92	40	106	362	86	103	246
TRIM34_ENSG00000258659.1	586	1205	211	435	505	870	997	118	604	303	785	637	854	653	307	198	249	110	290	474	342	105	572	400	181	197	537	253	624	808	1001	613	842	595	196	542	753	679	782	534	367	479	367	264	366	678	650	543	652
RP11-213H15.3_ENSG00000248323.1	140	206	33	700	30	510	520	39	180	175	374	600	239	16	63	110	40	12	1055	231	84	197	85	47	134	82	44	62	59	497	129	490	53	98	533	682	269	397	456	182	16	51	95	19	187	311	62	176	188
RP11-219G10.1_ENSG00000242169.1	38	78	27	46	39	50	68	93	48	17	45	20	51	71	7	29	11	10	13	40	7	12	56	28	9	30	27	12	124	18	55	59	62	57	35	5	21	90	21	18	17	26	21	20	71	70	32	52	74
AC068775.1_ENSG00000180574.3	445	511	175	294	405	410	350	547	245	199	545	282	433	957	145	164	44	28	85	125	59	98	419	384	64	488	201	205	449	194	740	213	626	424	205	101	391	714	300	224	164	191	192	176	280	343	492	373	352
SNORA70_ENSG00000253042.1	19	17	70	41	23	13	34	33	23	107	39	48	53	26	88	29	50	5	57	56	86	54	20	1	44	24	34	54	30	61	37	84	72	14	10	93	31	18	22	11	39	92	63	19	22	27	24	26	21
SARM1_ENSG00000004139.8	4547	3905	5464	3481	4102	3226	5576	3912	5655	1731	6570	3874	4863	3225	1226	1882	2271	139	967	3365	1008	1246	3272	1705	715	2590	2876	338	6679	3251	8022	4237	4234	7848	3276	2852	3088	6781	3640	4895	4362	5601	4537	1387	4653	4036	7458	4319	4866
CTD-2340F8.1_ENSG00000230512.4	15	18	5	3	4	18	16	36	4	7	11	6	9	12	0	0	4	4	16	31	4	0	14	31	0	1	9	20	23	2	23	6	11	39	5	12	17	16	14	1	10	9	12	6	32	35	12	16	13
AC097526.14_ENSG00000243523.1	0	0	0	0	0	0	0	0	1	0	0	0	0	0	0	0	0	0	0	0	0	0	0	0	0	0	0	0	0	0	0	0	0	0	0	0	0	0	0	0	0	0	0	0	0	0	0	0	0
AC002064.3_ENSG00000227646.3	8	8	13	18	12	2	33	3	4	2	32	12	12	2	9	12	6	0	6	3	13	15	4	5	1	7	0	0	16	13	16	8	12	11	2	21	23	21	38	0	7	15	9	0	12	4	12	11	17
OR7G3_ENSG00000170920.2	0	0	0	0	0	0	2	0	0	6	0	0	0	0	2	0	0	0	0	0	0	0	0	37	0	0	0	0	0	0	0	0	0	0	3	0	0	0	0	0	0	0	0	1	0	0	0	2	0
RP11-322N21.2_ENSG00000250719.1	0	0	0	0	2	10	2	1	6	0	1	0	1	1	0	2	0	0	0	2	0	0	0	5	4	2	0	0	0	0	2	0	0	1	3	0	2	0	0	0	0	0	0	1	0	1	0	0	0
CTD-2530H12.4_ENSG00000255326.1	32	10	24	12	21	12	6	3	14	5	36	31	18	3	3	8	21	0	1	29	3	0	19	0	0	0	27	1	16	18	34	12	23	27	7	4	1	3	14	22	23	17	29	4	2	24	55	38	23
TRAC_ENSG00000229164.4	333	72	93	331	1238	214	373	743	1008	351	142	117	251	28	57	177	84	38	28	297	142	60	88	62	347	259	872	9	265	139	623	559	1851	452	209	71	307	307	842	2243	178	89	181	314	307	396	211	2005	296
USP28_ENSG00000048028.7	890	950	441	402	1063	1103	884	1080	777	583	1247	732	880	1012	384	439	311	50	483	422	315	238	724	971	238	480	635	248	473	1007	1009	444	1165	1097	504	566	834	1125	958	1069	696	631	555	379	978	748	1455	753	814
RP11-1033H12.1_ENSG00000258694.1	3	0	0	3	1	0	1	0	0	2	1	0	1	0	2	0	0	1	3	2	2	0	0	2	0	2	0	0	0	0	0	0	0	0	0	0	0	0	0	0	0	0	0	0	0	0	0	0	0
AC096540.1_ENSG00000242821.1	4	8	10	11	9	6	5	10	12	12	25	14	14	6	6	14	2	0	3	3	11	5	3	5	5	4	1	5	7	9	10	5	13	8	12	2	8	7	10	7	5	6	5	3	7	9	13	5	8
RP11-84P7.3_ENSG00000224304.1	5	1	4	1	7	12	4	1	4	4	19	3	0	4	23	9	0	1	13	4	7	14	15	3	11	8	1	2	8	6	2	4	1	3	1	0	1	2	0	3	6	4	8	0	9	10	1	1	5
CFL1P5_ENSG00000213830.3	70	29	88	80	108	71	154	53	143	80	182	122	104	121	67	131	54	6	53	137	71	39	95	25	38	29	33	47	116	115	64	223	98	97	62	205	158	70	98	63	74	92	113	20	70	116	53	116	143
RP11-32B5.6_ENSG00000258848.1	0	0	0	0	0	0	0	0	0	0	0	0	0	0	0	0	2	0	0	0	0	0	0	0	0	0	3	0	0	0	0	0	0	0	0	0	0	0	0	0	0	0	0	1	0	0	0	0	0
RP11-418J17.1_ENSG00000231365.1	321	189	272	243	355	363	315	338	527	219	377	390	480	373	204	346	192	33	462	818	223	130	174	116	144	69	612	141	276	437	300	188	422	384	343	314	388	386	252	395	459	290	262	158	436	465	296	334	210
CABLES2_ENSG00000149679.6	301	545	575	459	633	837	779	451	595	435	323	500	793	1237	274	629	218	21	708	611	708	298	728	510	274	260	306	197	329	507	644	502	406	547	616	656	674	1081	928	822	1037	582	505	262	520	993	465	594	438
MIR200A_ENSG00000207607.1	10	40	53	36	63	93	59	171	10	10	58	129	77	17	36	82	44	5	170	253	88	71	235	1	29	25	3	62	142	40	144	54	104	28	7	136	16	188	294	59	57	354	120	7	47	84	84	45	88
U6_ENSG00000200877.1	0	0	0	0	0	2	0	0	0	0	0	0	0	0	0	0	0	0	0	0	0	0	0	0	0	0	0	0	0	0	0	0	0	0	0	0	0	0	0	0	0	0	0	0	0	0	0	0	0
ASS1P1_ENSG00000220517.1	6	14	6	24	97	12	20	51	80	16	11	51	27	5	13	11	8	10	34	16	41	9	13	11	113	10	44	2	11	33	14	13	55	5	31	8	10	14	26	189	15	20	28	43	5	20	10	155	27
ODF2_ENSG00000136811.9	1798	2604	754	2159	1294	4097	4204	2408	1829	1458	2465	1252	2000	2125	1937	1608	829	186	705	6468	1954	1877	1674	911	1146	1203	1769	2188	2203	2146	2548	1592	2650	2149	2011	2745	1608	2040	1240	2435	1814	2492	2085	911	2470	3628	2134	1921	1933
RP11-157H10.4_ENSG00000237740.1	5	4	8	8	7	2	0	4	12	9	4	5	8	0	8	2	5	2	5	6	1	4	4	1	2	1	6	4	7	7	4	21	3	9	9	5	10	9	2	2	14	7	8	5	0	2	4	6	4
RP11-213G6.2_ENSG00000254002.1	0	0	0	0	0	0	0	0	0	0	2	2	1	1	0	0	0	0	1	7	0	8	2	3	0	0	0	0	0	0	1	0	1	0	0	1	0	5	1	0	0	2	0	0	0	0	5	1	0
CLMN_ENSG00000165959.5	5599	2952	4441	3107	4758	2060	5211	4902	1410	5698	3503	3556	2324	1925	2844	4765	3420	1560	2773	4342	4951	2263	4557	1691	2974	1793	2229	5028	4811	3860	5162	773	3021	4534	1254	5067	6743	4393	4238	1624	3369	3103	3973	1520	5250	3767	1752	2642	5418
AL627169.3_ENSG00000243552.1	0	0	0	0	0	0	0	0	0	0	0	0	0	0	0	0	0	0	0	0	0	0	0	0	0	0	0	0	0	0	0	0	0	0	0	0	0	0	0	0	0	0	0	0	0	0	0	0	0
LECT2_ENSG00000145826.4	3	0	0	0	0	0	1	0	0	0	1	1	0	0	0	0	0	1	2	1	0	0	0	11	0	7	0	0	0	2	2	0	4	0	0	0	1	0	0	2	0	0	0	0	0	0	0	0	1
CCRL2_ENSG00000121797.8	295	1212	295	266	258	110	566	325	264	345	173	245	1077	891	98	186	70	48	59	671	165	32	425	101	51	106	99	32	867	197	965	60	775	912	158	98	573	473	360	169	391	114	164	62	405	816	239	618	360
DDHD1_ENSG00000100523.9	800	468	357	560	796	531	686	898	902	631	1038	578	724	695	261	290	143	19	347	473	235	475	215	596	276	343	435	127	409	743	731	357	637	588	262	430	409	320	610	1171	492	507	436	360	1505	444	1081	752	469
AP000487.4_ENSG00000254495.1	87	44	49	48	56	91	75	70	64	65	47	47	70	66	45	74	33	6	122	79	77	32	59	23	41	55	45	82	54	45	65	46	53	70	54	92	63	59	79	24	34	28	42	27	60	35	28	48	33
RP11-495P10.7_ENSG00000244252.1	2	29	9	77	19	1	28	31	19	8	22	30	27	16	39	23	9	1	56	83	17	4	18	15	21	4	224	5	2	53	16	100	21	69	61	16	148	10	42	105	135	116	10	10	18	76	8	15	68
BTNL8_ENSG00000113303.7	59	338	349	233	146	18	102	963	106	135	183	49	1107	0	37	220	73	27	51	354	269	30	104	97	22	1130	12	2	1545	651	1157	74	420	226	7	223	1598	67	23	101	136	454	193	3	1292	594	237	113	1486
YIPF7_ENSG00000177752.9	7	11	1	4	2	4	3	8	5	5	12	3	5	1	3	3	0	1	2	2	0	4	1	19	3	0	7	2	1	2	13	2	2	3	5	1	0	3	2	5	0	2	1	2	6	0	7	3	8
RP11-236F9.7_ENSG00000235562.1	116	192	132	159	83	260	342	126	148	134	287	179	609	829	50	190	18	23	92	56	18	42	2325	24	87	13	38	7	192	404	54	95	144	408	319	857	105	1212	884	534	286	725	190	164	4203	343	198	234	149
RP11-555K12.2_ENSG00000240669.1	2	0	6	6	2	5	0	0	1	15	3	3	6	0	2	3	4	2	1	0	1	25	2	0	6	0	0	2	4	1	0	5	0	0	0	5	2	0	7	6	0	6	2	2	5	3	0	5	2
RP11-413C10.6_ENSG00000188712.2	1	2	0	0	1	0	6	2	8	0	3	5	5	0	1	0	2	3	0	6	0	2	4	3	2	0	6	0	4	5	1	4	0	2	0	3	0	2	2	1	4	3	2	2	2	2	2	0	2
FAM105B_ENSG00000154124.4	1028	1318	581	828	956	1962	1387	1138	1462	961	1327	889	1661	1480	499	575	325	75	497	985	407	501	1274	723	259	420	508	451	727	859	1031	1032	1266	1037	1473	571	732	1879	899	1097	738	943	658	380	807	980	1145	1074	1143
RP11-1195F20.7_ENSG00000255211.1	10	6	4	0	8	0	0	0	9	7	5	16	0	2	4	0	3	2	6	2	0	0	3	0	2	0	7	0	6	11	2	6	2	3	2	11	4	1	2	2	1	12	0	5	2	3	0	2	8
RP11-305L7.5_ENSG00000230147.1	5	2	7	2	7	1	0	3	0	3	15	2	7	1	8	10	12	0	3	2	3	10	3	5	0	0	7	1	1	7	5	6	3	7	0	13	6	1	0	2	2	10	5	3	3	10	0	1	4
AC069200.1_ENSG00000203615.2	77	92	31	77	59	192	152	128	104	122	127	91	90	95	47	104	47	17	50	55	46	35	170	62	35	16	26	24	148	92	269	47	114	157	60	38	63	87	48	36	24	8	37	10	100	94	115	83	91
MYH9_ENSG00000100345.14	75636	167547	24835	67118	44381	125096	84353	91748	27159	46043	101599	31914	65905	87429	17567	32294	14978	1642	10894	32878	15380	15104	106493	10204	11863	46571	22706	13448	70779	31542	257751	87287	94260	205549	117905	20959	72970	105911	68240	38428	16075	48283	77468	21705	141351	58598	146057	71431	125812
U7_ENSG00000238419.1	0	1	5	2	0	0	1	0	4	2	9	3	2	5	0	0	0	0	0	1	2	0	1	1	1	0	0	0	1	7	5	1	3	1	3	1	1	0	0	4	0	1	2	0	0	0	16	2	0
DCST1_ENSG00000163357.6	100	237	94	210	103	317	453	140	118	54	340	325	233	168	232	269	72	21	162	225	262	182	291	27	161	37	70	113	160	226	221	445	182	63	544	271	187	207	239	132	155	591	125	138	165	209	97	102	226
SNORA70_ENSG00000252617.1	0	0	2	0	1	2	4	0	1	0	1	3	2	0	1	3	0	1	1	3	0	2	0	4	2	0	2	0	0	1	1	2	1	1	0	1	0	1	1	0	0	1	0	0	2	1	0	0	1
U6_ENSG00000201642.1	0	4	0	1	4	0	6	2	0	1	8	9	0	1	5	1	2	0	3	0	0	0	1	1	0	0	0	0	2	1	3	2	4	6	2	1	4	3	3	2	2	0	2	1	0	0	11	1	3
U6_ENSG00000201524.1	0	0	0	2	4	1	0	4	2	4	1	3	2	3	0	4	0	0	7	1	5	1	0	0	0	4	0	2	2	0	1	16	2	1	0	1	2	0	2	3	1	3	2	2	1	0	1	6	1
RP11-326L24.4_ENSG00000228947.1	30700	850	360	359	155	913	1984	60	111	4085	6200	146	307	10553	116	233	27205	897	472	603	210	43	265	2435	36	511	99	651	793	159	767	760	639	92319	1480	614	328	2221	584	172	1535	309	564	2425	474	438	1948	101	6152
AC118653.1_ENSG00000228118.2	31	48	15	29	19	35	37	39	24	9	37	13	24	18	5	17	9	2	4	44	3	5	94	33	0	13	15	8	34	12	43	20	18	49	27	4	41	52	26	8	7	20	11	11	49	41	82	28	41
USP17L1P_ENSG00000230549.3	8	6	3	17	14	2	4	4	10	4	9	3	6	11	5	3	4	1	5	0	1	0	3	5	3	1	5	1	4	17	6	18	7	4	2	7	3	2	7	5	6	13	7	5	8	6	10	9	3
C10orf125_ENSG00000148803.7	439	443	166	441	231	460	530	1213	414	236	369	122	991	34	208	1424	143	13	29	1343	548	135	700	287	161	813	390	136	313	309	193	187	629	418	450	212	621	115	914	259	179	210	508	138	1278	222	247	637	679
KRT223P_ENSG00000229028.1	2	0	3	1	0	0	6	0	2	0	4	6	0	0	0	0	1	4	3	0	0	0	0	18	0	0	0	0	0	0	0	30	1	2	0	3	0	1	11	0	0	0	0	0	2	0	0	1	0
SNORA75_ENSG00000212593.1	17	43	5	16	27	35	37	32	23	16	53	33	38	50	6	20	4	4	3	18	21	6	37	16	5	13	5	8	31	8	57	15	24	51	16	20	29	37	24	21	8	26	23	3	29	47	31	20	24
AL590730.3_ENSG00000243392.1	0	0	0	0	0	0	0	0	0	0	0	0	0	0	0	0	0	0	0	0	0	0	0	2	0	0	0	0	0	0	0	0	0	0	0	0	0	0	0	0	0	0	0	0	0	0	0	0	0
AC012363.3_ENSG00000243334.1	2	2	2	4	4	4	17	23	8	5	10	8	17	3	7	0	2	0	22	36	41	34	5	2	1	20	4	1	0	1	2	4	2	4	8	24	0	1	15	0	7	6	1	1	12	2	0	26	1
AC004774.1_ENSG00000244318.1	0	0	0	0	1	0	0	0	0	0	0	0	0	0	0	0	0	0	0	0	0	0	0	4	0	0	0	0	0	1	0	0	0	0	0	0	0	0	0	0	0	0	0	0	0	0	0	0	0
ZBTB34_ENSG00000177125.5	577	870	254	429	229	453	825	388	386	403	738	390	906	722	235	352	95	66	140	313	132	196	880	333	109	86	452	143	472	486	937	365	677	650	434	603	537	1064	445	331	594	598	380	183	540	1023	721	397	786
U7_ENSG00000252770.1	10	45	12	5	11	4	9	5	10	10	28	5	19	5	3	5	2	0	2	1	4	2	28	6	4	1	3	1	5	16	22	1	13	38	3	6	2	9	10	8	4	2	7	5	1	3	16	11	7
snoU13_ENSG00000239091.1	5	5	2	2	4	5	5	4	2	5	9	2	5	6	4	6	2	0	7	0	4	1	5	2	1	2	0	1	4	0	3	3	3	0	1	1	9	4	4	0	1	9	3	1	0	4	4	4	5
RP11-91P24.7_ENSG00000254459.1	89	90	97	109	135	161	119	56	209	176	83	119	85	107	144	81	43	32	127	165	96	91	129	42	26	65	476	28	240	108	150	189	135	89	85	64	166	100	116	63	82	112	94	55	111	122	92	110	145
GOLGA7B_ENSG00000155265.5	2349	3845	918	1288	612	499	703	76	461	949	1326	450	1512	440	445	1864	1802	13	151	1016	344	106	2665	514	122	883	1168	128	1164	1052	1918	693	1688	2555	840	1214	2539	767	1248	1518	2076	1765	867	380	764	2773	1237	594	3282
TCEA3_ENSG00000204219.5	2659	675	1520	1666	2616	3625	2622	1517	2092	1139	3730	1511	2689	1215	2811	858	1773	467	520	3055	1346	394	948	446	227	1523	453	1493	4563	1447	1841	1444	1850	5057	394	1073	2621	1160	1445	1215	3365	2350	1813	546	4033	3566	2320	725	3907
IGLJ6_ENSG00000211682.2	62	20	72	382	686	81	3	205	498	237	40	112	99	15	15	55	7	14	52	335	173	126	370	22	117	196	39	5	122	69	362	19	254	486	17	10	498	28	411	94	64	27	174	36	1135	339	220	3566	470
AC004893.11_ENSG00000242687.2	1011	974	720	620	576	658	1185	776	958	1364	818	1049	1933	1928	496	834	389	65	452	635	729	678	1188	585	429	344	544	447	726	764	1282	520	874	1265	793	884	2249	1317	796	773	585	886	759	309	1233	697	746	793	1156
ZNF280B_ENSG00000198477.3	282	120	104	60	200	212	182	323	243	79	157	89	98	257	41	34	63	17	240	20	77	185	18	81	98	8	488	37	163	89	239	20	273	194	101	78	214	57	88	396	222	70	115	61	265	114	253	410	184
BMS1P7_ENSG00000243899.1	256	312	226	191	478	165	1012	323	290	237	374	636	779	381	365	438	180	58	682	206	222	403	248	47	143	291	103	234	376	300	203	377	250	227	226	468	350	357	331	306	334	459	287	149	417	500	208	284	507
RP11-522D2.1_ENSG00000236719.2	0	0	0	0	0	0	0	1	0	0	2	0	0	0	0	0	0	0	2	2	0	0	0	4	0	0	0	0	0	0	1	0	0	2	2	0	2	3	0	0	0	4	0	1	0	0	0	0	2
AC113407.4_ENSG00000240472.1	0	0	0	0	0	0	0	1	0	0	0	0	0	0	0	0	0	0	0	0	0	0	0	2	0	1	0	0	1	0	0	0	0	0	0	0	0	0	0	0	0	0	0	0	0	0	0	0	0
SYMPK_ENSG00000125755.11	9608	21351	10461	18696	10910	12814	19589	13754	12428	10809	10473	15900	15675	27915	9168	19815	8339	3384	18854	27306	20605	11326	20819	5951	8901	7776	7548	7116	16229	13215	22037	14884	14069	15266	19404	21649	28997	21730	19860	11569	16690	21808	24524	8321	32241	14565	16674	17509	77108
RP11-563H8.2_ENSG00000229814.1	1	2	0	0	0	2	0	0	0	0	0	0	1	0	0	1	0	0	0	0	0	0	0	2	0	0	0	0	0	0	0	0	0	1	1	0	1	0	0	0	0	1	0	0	1	1	0	2	2
U6_ENSG00000200462.1	0	0	1	1	0	0	0	0	0	2	0	0	0	0	0	0	0	0	0	0	0	0	0	0	0	0	0	0	0	1	0	0	0	0	0	1	0	1	0	0	0	0	0	0	0	0	0	0	0
RP11-539I5.2_ENSG00000248381.1	11	9	1	2	23	5	9	4	4	0	16	6	11	4	2	5	5	1	3	35	2	6	3	2	0	2	1	1	10	9	8	6	12	5	2	6	8	20	9	2	1	1	4	2	0	11	8	5	7
CITF22-92A6.1_ENSG00000258242.1	88	83	49	126	155	152	83	26	49	87	107	104	74	86	99	32	65	12	89	166	80	61	106	22	35	100	74	25	403	46	136	174	128	147	70	75	142	111	110	73	141	93	96	42	166	121	70	83	171
ORM1_ENSG00000229314.4	10	3	25	5	88	22	25	15	0	20	62	10	7	11	39	5	16	6	2	9	2	1	592	35	19	2	2	2	35	14	16	8420	29	47	36	29	19	26	4	6	40	6	1	15	15	6	7	9	11
MPDU1_ENSG00000129255.8	2242	2681	957	1153	2100	2479	3290	4858	943	3317	1716	1065	1660	1561	692	1053	768	73	575	2095	794	1018	3169	651	385	3079	998	786	3050	1475	4610	2594	2615	3990	1045	684	2846	3078	1971	1159	1279	1122	1476	472	2483	2752	1741	2036	2042
EIF4BP4_ENSG00000229572.1	0	0	0	0	0	0	0	0	0	2	0	0	0	0	0	0	0	0	0	0	2	0	0	6	0	0	0	0	0	0	0	0	0	0	2	0	0	4	0	0	0	0	0	2	0	0	0	0	0
SNUPN_ENSG00000169371.8	883	669	644	730	841	1029	1104	1293	745	596	960	799	863	1003	441	476	290	77	339	548	355	431	1402	533	228	698	670	428	3383	463	1660	892	1159	1578	724	370	1107	1595	868	576	404	494	564	436	1887	1081	1049	668	988
TRBV5-7_ENSG00000211731.1	58	5	0	2	10	1	5	0	11	6	10	0	2	7	0	2	37	0	5	0	2	0	1	0	2	3	7	0	1	0	0	1	11	468	2	3	0	2	7	11	10	3	0	4	0	2	2	8	8
RP11-203M5.6_ENSG00000259162.1	21	25	0	27	21	0	31	0	0	0	11	11	160	0	5	21	1	2	3	0	0	0	16	0	0	3	0	0	39	18	9	3	58	31	2	28	75	26	162	70	15	13	10	3	6	88	8	5	90
BCL2L11_ENSG00000153094.15	872	748	451	506	575	1386	808	553	931	632	811	770	922	1683	265	381	204	30	1028	326	322	243	584	692	180	223	306	278	517	623	1776	998	954	744	496	539	553	920	822	710	351	635	409	337	748	388	592	1183	812
OR51E2_ENSG00000167332.7	17	11	14	16	19	16	19	2	8	0	150	9	22	4	14	1	2	3	9	6	4	3	15	19	3	1	0	0	25	10	23	13	16	19	5	5	7	33	28	4	20	28	18	23	2	15	106	28	9
PRR25_ENSG00000167945.1	4	13	6	1	17	19	13	3	14	0	29	10	19	6	7	17	6	2	15	26	11	20	5	0	4	9	10	3	6	14	0	39	15	1	8	14	9	43	7	11	18	13	1	3	3	5	6	5	3
AC008174.3_ENSG00000231646.1	33	27	66	40	26	39	20	9	51	41	46	101	90	90	133	17	25	4	425	91	60	107	25	17	31	57	76	35	63	44	20	35	66	88	59	71	58	17	29	35	56	104	64	21	31	52	19	56	91
RP11-431J17.1_ENSG00000253170.1	2	0	0	0	0	0	0	0	0	0	0	0	0	0	0	0	0	0	1	0	0	0	0	3	0	0	0	0	0	0	0	0	0	0	0	0	0	0	0	0	0	0	0	0	2	0	0	0	0
BACH2_ENSG00000112182.9	541	264	105	483	739	273	365	54	270	400	434	202	152	311	26	92	143	49	73	197	99	59	215	55	240	27	152	17	81	274	525	339	529	746	642	236	75	292	251	786	124	235	160	313	81	139	407	207	287
SLC12A9_ENSG00000146828.11	13648	39115	20205	19346	10874	33432	48868	28694	29451	17649	23977	28008	73279	30491	16455	40330	9469	1065	12279	41129	42690	9795	36644	1387	12860	11911	10138	3109	27923	23240	30040	17572	26639	29866	10677	20210	30228	40642	26088	29184	22142	38040	24268	8251	38123	20039	17961	18038	43919
PBX2_ENSG00000204304.4	5470	6624	3728	4621	6229	4894	6431	3378	7125	3380	6992	6946	6486	5542	2805	3961	2603	195	1458	3798	3318	2174	6086	1061	2442	1820	3331	1970	3334	5527	6936	4217	6190	5922	1930	3680	7255	4807	7756	8387	6370	8036	5165	3341	3898	5928	8763	6977	6133
U1_ENSG00000201558.1	0	0	1	0	1	0	4	0	1	1	0	0	0	0	0	0	0	0	3	0	0	0	0	0	0	0	0	0	0	0	0	0	0	0	1	0	3	0	0	0	0	0	0	0	1	0	0	1	1
RP11-1078H9.2_ENSG00000258935.1	63	25	18	48	27	27	22	11	44	28	72	21	40	18	15	13	33	2	11	28	8	29	21	10	14	25	66	15	20	19	71	43	59	37	20	18	14	17	31	38	43	39	36	30	4	23	144	48	31
U6_ENSG00000252279.1	0	0	0	0	0	0	0	0	0	0	0	0	0	0	0	0	0	0	3	0	0	0	0	0	0	0	0	0	0	0	0	0	0	2	0	0	0	0	0	0	0	0	0	0	0	0	0	0	0
RP11-467M13.1_ENSG00000214967.4	3809	3317	4226	5796	4406	6553	4912	2612	5034	4211	4001	4391	3711	3764	5971	5486	3223	987	2955	10494	9160	3706	2716	289	2824	1466	2918	6562	3297	6775	2748	5652	4983	2746	5533	5491	3195	4428	9373	6745	13234	10837	6807	3867	4346	5808	3974	5640	3540
SNORA43_ENSG00000199815.1	13	25	12	7	11	5	23	14	8	12	8	12	7	14	11	9	3	3	17	12	12	11	7	10	2	17	24	11	19	13	12	22	17	12	4	5	11	2	7	9	4	4	13	3	12	13	4	8	5
COL4A2-AS2_ENSG00000224821.2	245	1111	114	209	186	313	700	206	128	283	2126	240	467	51	236	101	35	19	35	37	23	94	1862	31	57	47	186	26	144	106	3375	462	598	734	80	81	164	517	340	113	56	378	568	118	406	206	3537	614	384
U4_ENSG00000201379.1	0	0	0	2	0	2	0	0	0	0	0	0	0	0	0	0	0	0	0	0	0	0	0	2	0	0	0	0	0	0	0	0	0	0	0	0	0	0	0	0	0	0	0	0	0	0	0	0	0
SLC35A1_ENSG00000164414.11	860	2324	791	568	1192	1126	1856	1499	774	666	954	498	2049	2439	280	575	142	31	380	815	206	128	900	180	162	311	464	193	1325	728	1150	458	2040	1073	777	507	1245	1276	1013	358	615	575	646	281	2348	1306	761	791	1839
PEX26_ENSG00000215193.5	3949	7012	2443	2259	3250	4507	3235	5265	1890	3094	4632	3025	3406	4490	1674	1678	1273	115	1557	2018	1307	1785	4559	1599	1237	3926	3931	852	6505	3286	7283	3930	4121	6358	1925	1403	3193	5321	3041	2434	1689	2649	2553	1124	3945	2303	3888	3907	5169
U1_ENSG00000207322.1	0	1	0	0	0	0	1	0	0	0	0	0	0	0	1	0	0	0	0	0	0	0	0	1	0	0	0	0	0	0	0	0	0	0	0	0	0	0	0	0	0	0	0	0	0	0	0	0	0
AC111177.1_ENSG00000180913.2	1	0	3	2	0	0	2	0	0	0	2	0	3	0	0	0	2	2	0	0	2	0	2	0	0	0	0	0	0	0	0	2	2	0	0	1	0	0	1	0	0	0	2	0	0	0	0	0	0
RP11-862P13.1_ENSG00000258490.1	25	44	35	28	41	32	25	33	25	40	23	26	17	24	59	19	29	5	55	29	25	12	9	6	8	26	30	3	54	32	21	7	33	35	10	18	29	40	35	19	30	32	18	10	43	36	24	51	37
CAPRIN1_ENSG00000135387.14	7008	12266	2280	5743	4396	8574	9518	7222	5939	3785	9195	3523	7640	11469	2805	1903	1140	539	1244	2556	1512	1045	6952	7635	1311	3455	3783	5353	8933	3024	19173	4310	11760	10671	4811	2342	8128	10134	5892	3544	2446	2316	5854	2777	9033	7347	10533	6932	6628
7SK_ENSG00000253073.1	0	0	0	0	0	0	0	0	1	0	3	0	1	68	0	0	0	0	0	0	0	0	40	1	0	0	0	1	0	0	1	0	0	0	1	0	0	0	0	0	0	0	0	0	0	1	0	0	0
RP11-159J16.1_ENSG00000224494.1	0	2	1	7	3	3	8	1	5	1	2	1	4	4	0	3	2	0	1	2	1	2	3	10	0	2	2	1	1	0	3	0	10	1	2	2	3	2	2	2	1	1	3	2	1	3	2	1	4
RP1-95L4.4_ENSG00000217648.1	48	65	136	32	28	151	72	43	52	27	76	134	109	240	36	67	29	0	135	55	28	44	37	16	38	24	296	12	44	56	70	68	53	90	239	55	23	77	77	104	54	100	35	28	28	26	99	48	87
SLC20A2_ENSG00000168575.5	3501	4274	2343	2601	2648	6739	6730	2404	2255	2541	4775	3126	5308	10215	1152	1671	1352	174	1600	3362	895	1415	3346	844	1021	767	3364	548	3639	2923	5986	2600	3900	9346	4586	1592	2113	9354	3507	1805	2326	3203	1674	1146	3501	2763	6539	2702	8297
AL583842.2_ENSG00000233798.1	1	0	1	1	0	2	8	0	1	0	0	3	4	3	0	2	0	1	1	0	0	1	1	46	0	0	0	0	4	1	0	0	2	0	0	0	4	0	0	0	0	0	1	1	2	4	0	0	18
NOMO2_ENSG00000185164.9	10125	21182	3486	5279	6042	14858	12811	11798	10416	3690	10222	4621	10181	22891	3428	6209	4689	606	1503	6442	4360	2090	15953	1036	1790	3383	5009	1359	9807	4661	16536	5174	10808	26490	8380	5733	9729	11808	12551	7151	4576	7016	4943	1807	12872	11927	16178	9511	8306
TBX15_ENSG00000092607.8	68	103	23	297	130	56	37	970	366	123	71	84	459	19	4	223	4	11	87	280	17	46	14	159	61	7	17	30	312	24	384	118	381	197	54	112	1737	14	129	166	134	123	32	46	103	841	37	338	55
ANKH_ENSG00000154122.8	9172	7816	4437	9161	6005	20460	7544	3132	16798	5954	9687	4726	6953	3250	2036	3709	2964	239	1700	3696	2721	1867	8281	1379	1077	3559	4919	596	6816	4582	24203	7514	10545	7351	8159	2987	3373	7365	5680	6874	4189	5385	6670	3022	2256	4832	11547	6882	7518
ZNF32OS1_ENSG00000226245.1	195	132	128	239	211	224	226	140	273	146	183	177	203	201	145	251	148	35	99	244	158	50	271	40	77	108	401	68	293	271	230	427	284	151	227	116	307	153	317	195	235	158	172	116	38	169	210	249	193
IGHD2-8_ENSG00000211925.1	0	0	0	0	3	0	0	0	0	2	0	0	0	0	0	0	0	0	0	0	0	0	0	0	3	0	0	0	0	0	0	0	2	0	0	0	0	0	0	0	0	0	0	0	2	0	0	15	0
MAMDC4_ENSG00000177943.8	4241	5186	2175	11839	2878	8412	10010	2430	3505	2667	8074	5255	7541	4196	6338	25134	6109	338	10937	8967	4021	4950	7512	454	3767	1669	1990	15917	5697	10762	8188	10859	8508	3671	12409	11103	11169	8607	14418	6233	11788	10354	22946	7731	11901	14640	7202	20011	14594
RP11-210M15.1_ENSG00000258010.1	29	3	71	11	65	36	10	58	9	11	14	9	10	2	12	4	20	12	14	11	23	17	7	18	7	2	254	19	13	12	24	82	12	26	15	5	11	3	8	32	10	3	44	15	0	40	22	14	11
RP11-1396O13.9_ENSG00000231637.3	1	1	0	1	4	1	0	0	0	1	1	0	1	0	1	1	0	0	2	0	1	1	1	1	1	0	0	0	1	1	1	1	0	1	0	1	5	0	1	0	1	0	1	0	1	1	0	0	1
U6_ENSG00000207518.1	28	23	22	15	39	23	15	29	26	31	20	25	14	11	33	11	9	0	11	16	5	3	16	19	2	11	25	5	11	15	36	21	25	24	15	10	18	14	29	28	17	24	28	13	12	21	10	20	14
U3_ENSG00000212551.1	0	0	0	1	0	0	0	0	1	0	0	0	0	0	0	0	0	0	0	0	0	0	0	0	0	0	0	0	0	0	1	0	0	0	0	0	0	0	0	0	0	0	1	0	0	0	0	0	0
TPTE_ENSG00000166157.11	146	96	141	138	86	97	124	102	128	193	107	165	63	161	95	100	92	70	161	205	134	170	75	148	93	195	236	136	163	126	76	118	167	95	139	108	71	106	86	64	91	103	78	87	87	115	83	140	148
RP5-1100I6.1_ENSG00000236151.1	0	0	0	0	0	0	1	0	0	0	0	0	0	0	0	0	0	0	0	0	0	0	0	4	0	0	0	0	0	0	0	0	0	0	0	0	0	0	0	0	0	0	0	0	0	0	0	0	0
NHEJ1_ENSG00000187736.8	492	719	395	474	609	563	823	849	557	444	958	545	897	844	857	513	168	51	536	529	407	215	723	385	307	874	332	141	865	717	653	405	854	953	961	672	883	637	1082	657	465	1143	580	420	1821	775	2572	874	599
TMEM139_ENSG00000178826.6	675	2256	345	628	429	731	1598	1375	139	351	478	921	254	2068	1251	463	161	105	314	1275	415	20	546	182	370	1091	93	153	1544	886	1250	1313	615	2063	94	638	1852	700	403	250	970	103	565	170	2848	1474	307	718	2075
SNAI1P1_ENSG00000237194.1	11	0	0	0	0	2	4	0	0	0	4	7	0	2	1	4	8	4	2	3	8	0	0	2	0	1	48	0	5	0	2	0	6	1	0	4	0	0	4	14	2	0	7	0	0	0	2	3	2
U6_ENSG00000207402.1	2	0	3	1	4	2	1	4	3	3	5	1	3	2	4	1	3	0	2	4	4	3	1	3	2	0	1	0	3	0	1	3	4	0	1	0	0	2	0	3	3	1	3	2	0	1	0	6	1
RP11-755O11.2_ENSG00000257514.1	1	4	87	97	2173	2	1	64	2	2	10	68	0	0	12	0	10	0	0	0	0	3	4	522	12	0	2	0	0	0	23	0	1	3	6	1	0	1	55	2	0	5	17	5	106	1	0	42	186
PDCD7_ENSG00000090470.7	2323	1202	2220	2478	2261	3217	2748	2225	1970	1702	1766	1887	2266	1218	1831	2154	1202	583	1099	2898	1710	1881	1749	513	1095	1611	2139	780	2351	1719	2254	2497	2320	1717	3382	1251	1915	2280	2143	1328	1288	1648	1784	1535	2148	1813	1878	2808	1536
RP11-410C4.4_ENSG00000231529.1	0	0	0	0	0	0	0	0	0	0	0	0	0	0	0	2	0	0	0	0	0	0	0	3	0	0	0	0	0	0	0	0	0	0	0	0	0	0	0	0	0	0	0	0	0	0	0	0	0
RP11-781D11.1_ENSG00000235549.1	0	4	1	0	0	1	4	0	0	0	1	0	0	0	1	0	0	1	0	1	4	2	1	5	0	0	8	0	0	1	0	2	2	0	1	0	0	0	0	1	1	2	1	0	0	1	0	2	0
SNORA20_ENSG00000206947.1	2	2	3	0	7	0	3	0	0	0	3	1	0	0	0	0	2	0	0	0	0	0	0	0	0	0	0	0	0	1	5	4	0	27	0	4	0	0	4	3	3	1	2	4	0	3	3	5	5
RP11-397O4.1_ENSG00000229206.1	5	2	2	3	0	0	2	1	0	19	11	1	1	0	4	1	1	0	0	0	0	8	18	0	0	3	0	0	2	4	2	2	5	5	1	0	0	0	0	4	0	6	3	3	0	0	26	1	2
RP11-556O5.4_ENSG00000253981.1	102	172	158	139	178	64	60	102	170	115	177	315	130	536	148	71	93	19	87	281	62	146	134	81	57	51	27	37	168	151	82	163	102	195	54	89	117	305	317	163	313	335	256	109	563	129	225	273	142
BMI1_ENSG00000168283.7	2308	2893	883	1554	1307	1061	1511	1645	2371	1249	2398	1408	1856	2161	416	394	507	134	280	361	415	208	7820	1845	331	630	1852	1105	1671	1760	2185	1194	2360	2638	1042	749	3036	976	2084	1471	834	1049	1305	1065	2077	1625	3120	2085	1840
NFATC4_ENSG00000100968.9	4888	18286	3252	24061	3717	7574	4141	570	3662	4542	10321	5733	3296	2694	1975	16030	3109	185	9022	15819	3064	2557	12354	1028	5203	544	8345	774	8948	13380	11700	11826	6288	5834	8573	10372	5177	6350	22324	12331	11024	12683	8930	5999	4475	8999	26560	7465	13178
TMC5_ENSG00000103534.9	11159	23229	23505	16917	14700	8199	16535	10846	4794	27921	25719	8325	26838	6823	27367	15203	5974	3610	7063	15231	40302	18947	5384	3520	18230	4755	577	37855	45369	16993	22578	13913	19768	29891	217	15682	39900	15329	20309	10943	13746	35604	41180	4102	35288	22137	9226	17227	19193
CTD-2653D5.1_ENSG00000255438.1	519	1806	125	451	313	944	2135	2120	1223	399	837	258	1292	2386	123	471	83	11	198	147	215	214	418	31	231	31	91	94	273	288	1717	656	516	816	581	423	453	509	628	331	230	690	310	172	768	862	1656	479	609
RBM45_ENSG00000155636.9	264	312	171	156	274	370	408	306	443	135	342	304	351	427	154	146	92	12	138	191	144	99	299	283	86	161	557	84	268	225	388	251	352	267	252	223	291	426	260	226	197	267	150	98	347	337	284	308	332
DNAJC22_ENSG00000178401.9	1055	1746	455	407	1996	166	1489	563	430	218	661	727	1290	411	343	908	294	32	112	1837	115	153	893	223	196	648	230	184	1981	1290	2119	1705	968	1529	36	371	736	1048	574	495	398	235	285	109	1437	1088	565	791	771
OR5C1_ENSG00000148215.3	3	0	7	10	19	2	18	4	13	15	14	10	24	3	4	19	2	3	6	10	8	19	6	10	9	1	0	0	5	6	2	6	13	2	9	5	7	6	8	8	0	12	2	2	15	13	2	8	16
AC010894.4_ENSG00000179997.7	0	0	0	0	0	0	1	0	0	2	0	0	0	0	0	0	0	1	0	0	0	0	0	0	0	0	0	0	0	0	0	0	1	0	0	0	0	0	0	0	0	0	0	0	0	0	0	2	1
CDCA5_ENSG00000146670.5	358	1973	98	270	241	1048	1495	1605	347	265	118	204	445	1027	139	403	59	52	174	994	277	217	393	1030	75	911	186	166	946	416	893	305	653	1114	313	204	743	1461	406	353	176	305	256	103	2494	1069	223	710	447
MIR101-1_ENSG00000199135.1	0	0	0	1	0	0	0	0	1	1	0	0	1	0	1	2	0	0	1	0	0	0	1	5	0	0	0	0	0	0	1	0	0	0	0	0	0	0	0	0	0	0	0	1	0	0	0	0	0
RP11-609L23.1_ENSG00000257510.1	0	0	0	0	0	1	1	0	0	0	0	0	0	0	0	0	0	1	0	0	0	0	1	6	0	1	0	0	0	0	0	0	0	0	3	0	0	0	2	0	0	0	0	0	0	0	0	0	0
C2orf66_ENSG00000187944.2	16	6	0	5	2	6	15	11	22	5	15	18	0	0	3	5	0	0	2	26	2	4	8	10	0	51	6	3	4	27	8	7	11	1	37	5	3	30	3	27	41	15	12	10	16	6	18	7	14
TEKT4P2_ENSG00000227328.2	496	2594	1409	3888	1279	2063	2047	2268	1077	1474	1432	2129	1421	1083	2754	1795	1000	167	2225	4525	1471	3104	625	176	1250	1630	1186	988	1355	2058	1513	1961	2439	636	1820	3297	1993	1849	3933	1619	3200	2503	5139	764	1300	3126	4348	1069	1325
SLC1A4_ENSG00000115902.5	1881	840	496	834	1200	1779	808	1103	2062	606	1441	532	1904	643	394	473	568	55	437	1065	297	341	925	433	339	1590	564	142	1332	667	2418	836	1698	1990	718	486	1020	749	720	1387	515	724	791	433	602	1471	1644	1563	1168
CFHR3_ENSG00000116785.8	14	17	30	18	40	99	115	1	233	5	65	149	45	110	67	11	1	0	31	4	0	1	27	31	3	3	13	2	74	68	54	82	32	51	52	32	7	18	62	6	86	43	7	37	10	125	102	14	5
Y_RNA_ENSG00000202459.1	24	15	16	14	11	10	23	29	13	18	16	17	13	8	5	11	13	3	30	23	12	22	13	12	9	27	3	32	14	12	19	8	11	16	14	6	12	24	16	4	6	4	8	4	30	19	13	13	13
VSIG8_ENSG00000243284.1	31	31	86	169	67	27	47	104	283	24	167	124	71	38	80	82	40	10	130	1154	72	81	46	2	27	25	28	28	95	149	58	37	47	38	60	101	174	111	167	64	60	181	137	47	42	151	57	96	69
MIR1183_ENSG00000221783.1	2	1	9	7	7	7	1	7	5	6	3	10	7	4	4	2	3	0	7	11	9	6	2	4	3	6	6	1	0	5	3	3	3	7	3	3	1	4	2	3	4	4	6	2	3	2	1	6	3
RDX_ENSG00000137710.9	8858	6377	2519	2111	2346	5729	4230	789	7196	6503	4204	3887	6911	6914	1367	2050	1917	239	1045	2017	1050	316	7369	569	939	518	2747	2907	1319	2465	3401	5920	5150	6654	4015	1275	7163	11033	5250	1947	973	1193	1658	2330	2583	1864	5161	5244	2047
CTB-33O18.1_ENSG00000253768.1	0	0	0	0	1	0	1	0	0	2	3	0	1	0	0	0	0	2	0	0	1	0	0	1	0	0	0	0	0	0	4	0	0	0	0	0	0	0	0	2	0	1	0	4	0	0	3	0	0
PDIA5_ENSG00000065485.13	2220	2415	819	1406	1533	2095	1604	1917	3088	853	2890	999	1593	2713	2753	886	723	145	591	1245	813	668	2412	274	369	1719	404	866	1817	1150	3405	1581	2300	2857	1610	848	2198	2645	1284	1208	913	770	956	549	2861	2065	2191	1195	2397
KLHL20_ENSG00000076321.6	1159	1574	1008	1080	1404	1096	1134	1141	1352	966	1589	1072	1333	1300	1483	815	399	125	734	929	1262	588	1446	717	942	675	1124	767	1447	1060	2982	1768	1749	1425	825	1021	793	1640	1325	984	707	1559	1158	705	1287	1798	1797	935	1118
GTF3C2_ENSG00000115207.8	3584	7863	2647	3806	3498	5883	4820	6216	4596	2984	5355	5346	5458	7129	2593	3886	1476	310	2553	3661	2825	2393	7042	2972	1860	3149	1749	1661	2886	4347	8139	4798	4598	7316	3878	5137	5555	5002	5770	5674	5220	6500	4717	1699	8274	5523	5255	4336	4367
U6_ENSG00000212468.1	0	0	0	0	0	0	2	0	0	0	1	1	1	0	0	0	0	0	0	0	0	0	0	0	0	1	0	0	0	0	0	0	0	0	0	0	0	0	1	0	0	0	0	0	0	0	0	0	0
RP1-265C24.5_ENSG00000219392.1	24	6	6	5	19	10	11	4	19	9	19	15	11	2	13	4	7	4	2	3	4	10	11	2	10	13	32	0	2	32	2	6	9	8	7	19	13	14	11	25	4	22	10	10	2	4	8	17	8
RP11-493L12.2_ENSG00000247774.2	811	429	361	483	1173	421	814	208	1553	961	448	664	1518	277	117	371	232	39	753	587	451	208	634	64	897	51	251	13	394	1007	487	608	1079	224	207	1248	330	418	514	1578	504	363	232	325	123	318	262	852	606
RP4-760C5.2_ENSG00000225160.1	23	3	78	32	44	6	42	49	26	8	23	23	24	7	44	63	20	16	85	201	7	86	9	12	29	4	15	9	30	61	11	58	35	8	11	35	7	9	16	53	47	38	17	20	20	36	16	48	35
RP1-46F2.2_ENSG00000185847.3	4	0	0	0	0	1	0	0	0	0	0	1	0	0	2	0	0	1	3	1	1	0	0	12	0	0	1	0	2	0	0	0	0	0	3	0	0	0	0	0	0	0	0	0	1	0	0	0	0
AL161744.1_ENSG00000117598.7	40	3	31	17	8	18	11	0	2	1	88	20	4	0	1	6	13	0	0	2	2	2	17	29	1	0	629	0	13	0	151	2	38	17	1	5	5	9	4	28	3	2	23	16	0	34	73	52	12
GATAD2A_ENSG00000167491.10	4151	10166	2606	3799	3910	4321	6673	11269	4399	3648	4475	3064	7204	7470	1824	2518	1418	376	1384	4889	2678	2100	6922	4747	1886	3926	2029	1093	7422	3240	11478	4006	6059	8823	3963	2797	3194	7071	4799	3011	2422	2529	4355	2109	12064	5830	5334	4793	5724
GAL3ST3_ENSG00000175229.6	9	22	1	2	2	28	4	0	57	7	20	18	44	21	0	8	4	0	2	2	0	0	8	1	1	0	2	0	2	5	1	0	6	30	25	10	0	55	8	2	2	5	0	8	0	4	57	5	7
MIR126_ENSG00000199161.1	201	241	130	151	126	72	127	21	98	48	104	76	89	43	56	168	154	7	42	537	57	93	277	25	63	20	200	38	134	123	197	85	235	280	53	48	115	118	103	143	200	155	182	166	141	174	268	393	199
HS3ST3A1_ENSG00000153976.1	126	53	38	543	159	661	176	419	101	216	194	132	93	11	17	69	46	18	116	66	216	136	274	95	224	79	181	14	53	154	1084	1089	310	119	5494	51	66	216	216	136	20	191	170	119	254	113	352	220	118
AC083855.5_ENSG00000226621.1	6	2	6	4	8	1	9	4	8	4	7	5	4	2	5	3	0	3	1	0	4	4	0	6	3	0	1	2	5	2	4	0	2	5	1	1	4	6	0	6	0	1	2	2	1	0	0	8	1
U6_ENSG00000200132.1	0	0	0	0	0	0	0	1	0	0	0	0	0	0	0	0	0	0	0	0	5	0	0	1	0	0	0	0	0	0	0	0	0	0	0	1	0	0	0	0	0	0	0	1	0	0	0	0	0
RNU7-71P_ENSG00000251868.1	26	27	9	24	12	12	25	1	20	10	31	17	23	22	7	9	13	1	6	3	13	12	31	5	7	13	10	6	10	16	50	13	20	54	25	11	6	44	21	17	21	16	21	12	29	24	23	26	17
CARNS1_ENSG00000172508.5	491	3932	2014	1070	2600	1153	663	395	1046	3295	964	1114	2429	969	972	12091	435	41	1197	2772	310	4284	16454	184	3298	155	328	7132	1194	1395	4010	2252	1095	1051	402	892	7487	10554	15428	1697	2022	4688	1075	4187	1781	5690	948	883	1738
BEND7_ENSG00000165626.11	1360	1641	1097	586	1014	442	1015	1164	305	678	1421	563	3111	503	429	498	437	137	168	492	618	595	2170	725	244	784	383	717	1490	1337	1167	576	1595	1102	83	735	2072	393	1380	509	779	778	767	338	1021	1098	1174	1334	1541
AC093609.1_ENSG00000230587.1	15	4	36	17	60	3	13	24	26	15	44	40	39	2	11	20	13	7	16	9	11	24	119	10	21	49	4	7	21	25	55	4	24	37	15	30	68	2	52	48	24	19	54	11	8	49	31	37	71
SLC4A10_ENSG00000144290.9	462	2	147	29	30	14	11	2	3	8	379	56	9	6	3	18	166	10	7	7	16	3	19	63	4	1	107	0	445	31	154	3	224	178	0	14	6	19	19	310	70	7	185	30	2	103	130	412	70
AL078621.13_ENSG00000175509.7	15	1	6	3	11	2	6	4	21	7	9	11	8	2	4	10	5	0	10	7	10	34	8	2	6	22	6	7	5	15	0	7	1	11	22	15	0	8	13	8	7	11	4	12	0	8	4	4	6
HIST1H4C_ENSG00000197061.3	182	83	188	97	350	215	385	856	205	224	93	81	103	92	56	122	111	53	114	65	252	125	284	134	65	1755	72	124	313	24	717	423	314	203	37	14	288	259	83	34	19	28	180	13	195	241	63	141	142
FAM89A_ENSG00000182118.5	445	557	166	339	326	525	247	266	538	171	215	83	629	1080	41	197	63	8	69	393	66	300	538	533	122	181	280	87	282	138	506	337	806	469	181	156	393	164	203	189	88	142	239	156	134	243	294	398	937
CACNB1_ENSG00000067191.10	1960	5708	4398	12951	1571	1706	2502	355	3666	1497	1861	6201	4062	10568	2172	4295	1184	65	6072	4556	3978	383	1296	983	1184	370	1179	253	6269	3092	3775	2284	2155	894	4194	7305	5701	1706	4878	4061	12683	2985	5148	2710	2046	5122	2471	1587	11494
UBXN6_ENSG00000167671.6	6153	9621	2984	5965	4256	6970	6664	7036	5239	3074	6227	4298	7350	7785	2047	3432	3083	505	1985	10207	1994	1965	7699	3627	1397	3914	4028	1263	10550	3475	11370	5556	7211	8860	6900	2046	6197	7321	6611	3041	3219	3660	4962	2739	12018	7079	7288	5719	9396
U1_ENSG00000206694.1	13	3	41	27	27	40	10	8	46	32	16	39	59	12	11	23	52	0	30	13	35	44	33	2	8	6	37	0	2	54	12	75	28	15	8	33	6	9	16	50	20	43	12	13	0	21	12	10	11
HMGN1P36_ENSG00000235734.2	87	118	27	39	57	170	84	69	53	45	87	63	140	126	21	71	15	15	31	78	24	10	62	32	7	29	24	44	105	46	141	53	132	62	38	19	72	66	79	43	23	34	34	30	59	87	50	77	98
AC104809.3_ENSG00000226321.3	14	6	14	75	30	38	9	676	46	21	205	76	87	11	418	87	9	3	42	139	37	201	31	5	24	3	17	169	6	11	22	9	25	21	6	20	2	21	48	83	139	99	35	43	17	12	38	49	22
TCF20_ENSG00000100207.13	2445	3888	1641	1817	2007	3533	2395	3654	1569	2471	3766	2215	1907	4717	1806	1033	794	47	814	1235	886	1398	2364	1068	607	2192	1158	1861	3320	1383	4793	1626	2440	4763	2252	1528	2072	3309	2088	2039	1696	2709	2628	640	4801	2566	2980	2805	3424
AL031723.2_ENSG00000220489.1	7	4	4	8	11	11	13	5	14	12	5	15	7	4	8	10	0	0	6	8	16	3	24	8	12	8	5	1	4	10	2	25	3	13	3	4	9	9	15	3	9	23	1	4	6	8	8	4	8
RHEB_ENSG00000106615.5	3306	4515	983	1954	999	4050	3078	2043	2218	2026	2471	1092	1810	5538	701	1410	442	187	497	2377	412	473	3236	2659	326	1276	4552	771	3491	1477	3738	2360	3531	3322	1713	1131	1439	4077	1769	1222	777	1037	1161	692	3383	2386	3518	2458	2985
U1_ENSG00000206624.1	28	19	15	9	18	39	24	24	33	21	25	25	28	23	10	14	12	4	10	11	20	9	13	1	6	14	12	5	16	48	25	27	26	7	13	18	22	17	37	16	42	26	19	19	12	19	23	19	24
U6_ENSG00000199728.1	2	0	0	0	0	0	0	0	0	0	0	0	0	0	0	0	0	0	0	0	0	0	0	0	0	0	0	0	0	0	0	0	0	0	0	0	0	0	0	0	0	0	0	0	0	0	0	0	0
SNORD88C_ENSG00000220988.1	11	17	17	16	28	18	38	29	20	11	11	25	19	34	23	37	6	1	47	50	30	6	11	2	7	60	8	6	22	6	20	22	8	17	41	38	10	40	15	16	20	22	17	13	55	13	8	17	7
QRICH1_ENSG00000198218.5	3507	6670	2999	4366	3491	3614	4525	5791	4606	4239	4755	5951	3148	4963	1557	5086	1871	212	2518	3328	3864	1823	5247	3683	2188	1182	2201	1262	4784	4791	7465	3643	4584	6771	2709	5941	3740	4655	4030	7957	6711	6920	4209	2744	6315	6902	7110	5053	5017
RP4-753D10.3_ENSG00000234646.1	1	0	0	0	4	0	1	0	0	0	1	0	0	2	0	1	2	0	0	0	0	0	0	2	0	0	0	0	1	0	0	0	0	2	0	0	0	0	0	0	0	0	1	0	0	0	1	1	0
ELMOD1_ENSG00000110675.8	58	6	15	36	4	21	19	0	29	9	17	18	12	0	1	12	9	4	9	36	4	7	12	43	2	6	6	1	3	9	21	19	27	16	14	9	5	13	25	32	3	5	24	35	23	9	32	15	9
XX-2136C48.2_ENSG00000258939.1	11	1	2	0	5	1	5	0	1	3	1	0	8	0	1	0	2	9	2	0	0	0	16	16	2	1	1	0	2	5	0	3	6	7	0	8	2	0	2	0	0	1	0	1	0	2	8	3	6
OBP2A_ENSG00000122136.9	34	11	11	145	13	1131	42	5	13	39	17	37	54	6	208	28	8	7	23	12	84	5	13	4	36	12	14	22	322	62	55	73	32	36	133	47	12	259	31	27	71	113	113	29	40	25	29	25	91
RP11-478C1.8_ENSG00000249077.1	40	48	62	55	58	43	45	50	89	79	46	25	54	5	32	103	36	1	55	41	71	29	44	20	52	25	23	5	58	188	24	43	26	31	17	167	39	35	94	146	98	82	66	45	70	54	33	95	61
IGKJ1_ENSG00000211597.2	59	29	29	273	547	74	2	153	226	236	58	104	90	9	13	90	5	28	30	154	99	49	196	28	85	95	101	6	83	48	246	7	221	260	21	3	602	26	202	131	73	29	114	32	675	176	57	1744	839
AC124014.1_ENSG00000212074.1	3	1	0	1	7	2	0	6	11	7	5	2	3	0	3	2	0	0	0	1	1	0	1	3	6	0	9	0	3	1	2	0	22	0	0	0	2	1	9	14	0	3	1	9	3	0	2	13	2
RP11-407H12.4_ENSG00000227152.3	1	0	0	0	0	0	0	0	0	0	0	0	0	0	0	0	0	4	2	0	0	0	0	0	0	0	0	0	0	0	0	0	0	0	0	0	0	0	0	0	0	0	0	0	0	0	0	0	0
KLHL23_ENSG00000213160.4	1165	387	657	787	2112	376	1037	1736	392	290	1514	453	1983	1196	2034	796	250	57	266	1107	1489	1324	689	731	282	1105	285	381	2582	684	2731	1034	2527	1579	113	354	2411	800	1059	647	629	1434	962	200	392	1920	3188	788	1252
IL19_ENSG00000142224.11	0	1	0	7	4	0	1	0	0	3	37	6	0	0	6	2	0	3	8	0	8	26	0	8	5	0	0	157	2	3	11	24	2	1	5	3	8	38	4	0	0	14	0	2	0	1	0	0	2
CTD-2210P24.2_ENSG00000255426.1	0	0	0	0	0	0	0	0	0	0	0	2	0	0	0	0	0	0	0	0	1	0	1	1	0	0	0	0	0	0	0	0	0	0	0	0	0	0	0	0	0	0	0	2	0	0	0	0	0
AP000431.1_ENSG00000235965.1	0	0	0	0	0	0	1	0	0	0	0	0	0	0	0	1	0	0	0	0	0	0	0	1	0	0	0	0	0	0	0	0	0	0	0	0	0	0	0	0	0	0	0	1	0	0	0	0	0
RPS15AP18_ENSG00000242979.1	3	0	7	4	11	3	0	3	8	1	1	1	2	1	7	1	1	1	6	7	4	18	2	4	4	13	3	19	0	7	3	1	1	5	4	2	0	2	3	10	2	0	3	8	1	1	1	3	1
Y_RNA_ENSG00000201680.1	1	3	11	9	8	4	7	1	4	1	1	2	16	3	2	0	0	5	1	1	1	5	2	0	3	2	2	1	0	4	5	0	11	0	7	0	11	8	3	15	12	0	1	0	0	10	6	4	3
RP11-176F3.9_ENSG00000226801.1	91	55	39	79	56	73	109	81	69	78	88	77	58	67	37	51	25	5	69	53	65	55	58	51	49	59	36	104	109	111	68	81	86	66	121	94	63	38	46	42	118	56	61	26	62	119	49	91	49
C21orf119_ENSG00000256073.1	82	70	29	61	110	184	152	33	84	42	94	65	98	130	91	48	52	16	91	243	35	39	108	30	7	28	97	124	144	27	99	133	151	45	63	15	191	89	70	63	45	75	70	32	77	92	95	105	117
AC010975.1_ENSG00000229385.1	2	0	0	0	0	0	0	0	0	0	0	2	0	0	5	0	0	0	0	0	0	0	0	14	0	0	0	0	0	0	0	0	1	0	0	0	0	0	0	0	0	0	0	1	0	0	0	0	0
U6_ENSG00000252979.1	0	0	0	1	0	0	0	0	0	0	0	0	0	0	0	0	0	0	0	0	0	0	0	1	0	0	0	0	0	0	0	0	0	0	0	0	0	0	0	0	0	0	0	0	0	0	0	0	0
ANO1-AS2_ENSG00000254417.1	45	180	417	101	10	1	43	359	9	81	35	82	103	1	157	822	50	13	61	118	242	14	47	17	46	94	3	2	84	106	68	11	213	51	8	36	64	120	36	49	45	55	155	38	18	49	9	15	123
RP1-92O14.3_ENSG00000234694.1	19	20	29	34	41	97	28	24	20	22	37	32	21	29	39	24	17	0	55	124	65	43	15	15	24	102	16	10	42	50	27	14	38	30	24	22	76	54	48	68	96	136	19	13	40	30	15	19	36
C8orf73_ENSG00000204839.4	5341	35217	4971	9216	4103	20362	16050	5289	2587	4480	13153	10847	16465	35187	15636	32593	2165	3215	10802	18045	10654	2651	18596	6964	2792	1379	296	12067	12080	9961	13490	16597	20771	9778	13113	23843	15405	46089	54018	2638	10091	19953	18378	14650	27944	15625	7906	21067	16101
RP11-334A14.8_ENSG00000235563.1	5	17	9	34	18	8	13	4	17	9	29	14	12	0	13	26	13	5	63	23	6	5	14	3	0	43	0	5	9	31	5	312	17	2	47	32	31	9	28	14	19	21	5	14	56	15	13	41	49
RP11-255A11.4_ENSG00000227651.1	0	2	0	0	2	1	7	0	0	0	1	3	0	0	6	0	1	0	1	0	0	2	6	3	0	0	0	0	0	2	1	12	0	1	1	4	0	9	9	0	3	13	2	0	0	10	2	0	2
NPTX2_ENSG00000106236.3	6957	141	2273	360	230	321	266	22	66	86	3223	744	208	51	19	342	2648	16	36	198	104	9	566	46	9	22	5188	12	5897	120	1367	458	2535	2549	256	560	146	498	646	1697	2077	159	2737	325	90	1023	3358	2572	1058
JAK1_ENSG00000162434.7	9969	9596	3713	5321	6744	8984	6763	1818	5807	5672	10495	3966	6925	6217	3498	4668	2318	864	2098	5355	3056	1908	8284	5705	3474	2358	8020	3838	7713	5930	16986	4681	12590	14567	5615	3612	7491	5921	7157	6675	2631	5242	5789	3840	9030	7961	12175	7387	7035
RPS3P2_ENSG00000231307.1	44	37	34	26	36	28	51	26	68	54	41	54	65	94	4	32	9	0	22	12	27	29	46	14	11	15	13	14	31	51	30	37	44	46	34	82	64	100	39	42	22	57	13	7	35	53	21	24	46
AP001468.58_ENSG00000228404.1	57	9	56	39	33	32	18	13	14	39	32	46	28	47	19	12	40	13	61	63	71	20	28	3	7	30	40	15	46	75	29	35	67	19	133	68	98	9	41	29	102	57	58	49	22	62	32	40	22
RP5-828H9.3_ENSG00000226995.1	0	0	3	11	1	0	0	0	6	0	4	0	2	0	10	0	4	0	13	0	2	4	0	16	4	10	14	0	0	0	0	0	0	0	0	4	0	0	0	1	0	0	0	0	0	0	0	0	0
AL355098.1_ENSG00000240730.1	0	0	0	0	0	0	0	0	0	0	0	0	0	0	0	0	0	0	0	0	0	0	0	0	0	0	0	0	0	0	0	0	0	0	0	0	0	0	0	0	0	0	0	0	0	0	0	0	0
AF131215.1_ENSG00000231965.4	17	4	14	2	24	10	6	48	16	19	17	28	19	15	2	4	4	0	1	5	1	8	16	6	7	5	9	1	18	29	11	27	8	6	0	11	5	14	20	9	7	13	7	4	38	6	4	9	6
RASIP1_ENSG00000105538.3	1818	2188	725	779	955	559	1112	222	830	576	1409	427	952	231	3780	342	679	73	989	477	834	401	1576	119	440	313	1243	437	782	1389	2415	671	1935	2213	388	215	372	627	1283	1146	1176	1224	1082	1074	550	406	3733	2390	1129
RP11-521M14.1_ENSG00000253888.1	1	0	0	0	0	0	1	0	0	0	0	0	0	0	0	1	1	0	0	0	0	0	0	4	0	0	0	0	0	0	0	2	0	0	0	0	0	0	0	0	0	0	0	0	0	0	0	0	0
MYCBP2_ENSG00000005810.12	8711	6347	5083	5769	7334	9075	7412	6954	8877	7737	7451	5980	6150	4931	7632	4738	5391	1761	5226	8015	6727	3402	4507	1730	4462	4757	5986	2887	9078	4599	9282	4550	9372	8651	4974	5041	4858	4781	5580	8399	3485	5494	4398	3617	6579	5980	7344	7941	5648
RP11-20F24.5_ENSG00000237970.1	5	1	0	0	0	1	3	0	0	0	1	0	2	3	0	1	1	2	1	0	0	0	2	40	3	3	0	0	0	0	1	2	2	3	1	0	0	6	4	1	0	1	0	0	3	1	2	0	0
SCGB2A1_ENSG00000124939.4	254	2	99	104	30	42	38	0	0	11	206	88	60	0	14	26	122	0	2	35	3	0	125	10	2	0	32	4	219	13	65	175	153	85	0	5	24	33	46	76	6	6	121	3	4	84	42	407	51
AC142381.1_ENSG00000198229.5	10	5	5	15	99	6	0	38	22	89	7	13	7	2	3	11	4	4	1	31	10	1	16	9	9	16	21	0	21	1	35	0	57	65	9	1	358	8	69	39	6	9	22	13	260	30	24	195	75
SLC35A3_ENSG00000117620.7	1689	2493	1042	1372	1422	1186	2330	5227	1796	1050	1897	1565	2626	1629	1183	979	298	87	635	1468	1583	428	848	512	365	806	683	459	1575	1101	3247	898	2185	2943	1417	806	2466	1367	1585	824	643	1041	1172	372	2854	3153	1467	2245	2302
TMIGD1_ENSG00000182271.7	0	0	3	0	0	0	3	0	0	0	0	0	2	0	1	0	2	0	2	0	0	0	0	13	0	0	0	0	0	6	0	3	1	2	0	0	0	0	0	0	0	0	0	1	0	0	0	1	0
KLHDC8B_ENSG00000185909.9	1268	2278	501	1309	618	2083	651	349	1060	545	2452	881	1065	1012	270	721	469	23	733	915	232	233	2047	738	261	88	930	60	851	945	2190	824	1245	1766	625	366	783	1288	1341	908	1174	1235	1358	686	1434	691	6610	1434	1358
DPH3_ENSG00000154813.5	771	949	304	439	285	455	465	708	462	335	1160	325	691	1072	190	290	93	38	118	327	111	79	692	593	125	155	677	277	521	341	863	489	842	933	314	106	543	487	423	338	163	224	369	284	562	575	1453	675	530
RP1-283E3.8_ENSG00000244250.1	176	57	210	205	310	149	144	274	245	115	162	343	170	70	187	58	115	22	334	402	231	373	26	11	100	122	204	131	132	250	160	81	215	82	85	154	69	120	95	178	111	213	96	103	70	100	132	168	174
snoU13_ENSG00000239130.1	0	0	0	0	0	0	0	0	0	0	0	0	0	0	0	0	0	1	0	0	0	0	0	3	0	0	0	0	0	0	0	0	0	0	0	0	0	0	0	0	0	0	0	0	0	0	0	0	0
RP11-983C2.2_ENSG00000249873.2	2	0	1	0	0	1	0	1	0	0	0	0	0	0	0	0	0	0	0	0	0	0	0	13	0	0	0	0	2	0	0	0	0	0	2	0	0	0	0	2	0	0	2	0	0	0	0	0	0
GNL2_ENSG00000134697.6	2161	1735	1788	2129	2423	4102	2869	4211	2636	2136	2574	2139	2364	2530	2346	1999	792	468	1225	3170	2530	1062	1436	1921	1099	3671	845	3297	4340	1712	3084	1631	2655	2873	2051	1295	2120	2162	1832	1689	785	1978	1618	624	3135	3288	1992	2346	2223
OR1N2_ENSG00000171501.7	1	0	2	0	3	0	2	0	0	1	3	2	1	0	9	1	0	0	2	0	0	2	8	24	0	0	6	0	0	1	0	13	2	0	0	0	0	0	0	0	0	1	0	2	0	0	0	0	2
AL160267.1_ENSG00000240501.1	0	0	0	0	0	0	0	0	0	0	0	0	0	0	0	0	0	0	0	0	0	0	0	0	0	0	0	0	0	0	0	0	0	0	0	0	0	0	0	0	0	0	0	0	0	0	0	1	0
RP3-441A12.1_ENSG00000225945.1	0	1	2	0	0	1	0	0	1	2	1	0	4	3	0	0	0	0	0	0	0	2	1	2	0	3	2	0	1	2	5	1	0	7	0	1	0	4	2	8	0	9	2	1	1	2	0	4	3
AC097359.2_ENSG00000231449.1	3	2	15	8	3	4	20	1	14	5	8	12	3	2	0	4	7	1	15	1	28	6	6	9	0	0	6	2	7	20	5	19	13	6	16	9	0	2	5	13	29	6	18	7	3	4	4	6	3
C3orf18_ENSG00000088543.10	568	333	192	412	277	315	223	70	485	203	696	340	184	719	180	144	204	15	134	408	117	437	710	40	113	60	441	34	316	254	852	588	471	548	307	240	129	340	368	424	490	413	418	195	527	301	1515	392	404
PGAP1_ENSG00000197121.8	1289	875	445	615	621	781	1413	440	867	841	1080	1068	549	898	381	196	265	102	988	587	470	141	301	277	92	2760	357	27	669	524	884	503	616	804	898	894	673	1814	364	867	219	630	415	234	1174	671	915	724	955
SNORA29_ENSG00000206910.1	59	82	34	30	53	57	75	174	44	23	90	28	69	134	13	16	11	7	24	22	20	6	58	92	13	39	33	47	36	30	155	24	78	122	59	24	47	78	49	58	36	48	57	23	71	48	99	64	49
Y_RNA_ENSG00000200008.1	6	0	0	0	0	0	0	0	0	0	2	0	0	0	0	0	0	0	0	0	0	0	0	2	0	0	0	0	0	0	0	0	1	0	1	0	0	0	0	0	0	0	0	0	0	0	6	1	0
RP11-338E21.3_ENSG00000256314.1	35	46	56	73	79	24	50	52	81	56	194	33	116	35	120	41	24	9	28	39	80	51	73	143	36	45	166	79	38	59	84	41	86	51	37	20	43	35	45	54	37	84	66	47	101	51	375	74	41
AC009245.3_ENSG00000230383.1	3388	3126	1296	1414	2918	2758	2175	4192	4089	1593	2108	1770	1224	2226	619	1694	691	216	836	2463	572	359	2084	1246	537	3463	1308	410	2930	1130	3010	3002	2963	3160	1599	360	1382	4316	1373	980	670	749	1189	1069	3175	1048	1701	3373	1912
AC095061.1_ENSG00000216027.1	0	0	0	0	0	0	0	0	0	0	0	0	0	0	0	0	0	0	0	0	0	1	0	0	1	0	0	0	0	1	0	0	0	0	0	0	0	0	0	0	0	0	0	0	0	0	0	0	0
RP11-354K4.1_ENSG00000231762.1	7	2	4	3	2	1	8	2	1	7	11	19	0	1	3	21	7	0	28	13	6	3	2	12	0	2	4	0	0	20	6	8	5	0	1	16	1	0	7	5	3	3	4	13	5	0	2	9	6
MTA3_ENSG00000057935.8	2529	2298	1470	1484	2116	2601	1910	3542	1852	1839	2964	2195	2228	3278	1482	1650	908	129	1183	1970	1117	921	2640	1309	899	1228	1344	891	1776	1665	3303	2070	2011	3143	998	1556	3080	1522	1912	1961	1925	2155	1978	647	3269	2253	2807	2096	3209
Y_RNA_ENSG00000201343.1	26	26	78	70	41	44	25	66	77	86	31	45	23	76	124	40	56	28	100	59	79	43	18	21	13	40	51	92	72	30	27	25	36	21	52	28	52	43	16	15	28	21	35	16	27	33	17	46	23
AL138850.1_ENSG00000223307.1	0	0	0	1	0	0	0	0	0	0	0	0	0	0	0	0	0	0	0	0	0	0	0	1	0	0	0	0	0	1	0	0	0	0	1	0	0	0	0	0	0	0	0	0	0	0	0	0	0
5S_rRNA_ENSG00000222468.1	0	0	0	0	0	0	0	0	0	0	0	1	0	0	0	0	0	0	0	0	0	0	0	2	0	0	0	0	0	0	0	0	0	0	1	0	0	0	0	0	0	0	0	0	0	0	0	0	0
AC092156.3_ENSG00000240717.1	0	0	0	0	0	0	0	0	0	0	0	0	0	0	0	0	0	0	0	0	0	0	0	0	0	0	0	0	0	0	0	0	0	0	0	0	0	0	0	0	0	1	0	0	0	0	0	0	0
RP11-286H14.3_ENSG00000240416.1	0	0	0	0	0	0	0	0	0	0	0	0	0	0	0	0	0	0	0	0	0	0	0	6	0	0	0	0	1	0	0	0	0	0	0	0	0	0	0	0	0	0	0	0	0	0	0	0	0
MTTP_ENSG00000138823.7	201	45	874	53	17	25	58	86	78	9	87	17	12	11	50	2	4	5	4	7	14	6	9	37	1	1704	2	3	5	1	11	3	6	22	8	32	31	1	1	3	2	18	11	5	12	8	137	4	2
AC011491.6_ENSG00000214347.3	2	1	0	2	4	1	3	3	2	1	0	0	2	0	3	1	0	0	0	1	0	4	0	6	3	0	2	0	0	1	1	5	1	0	0	1	4	3	0	2	3	6	0	0	0	4	0	0	2
RND1_ENSG00000172602.5	2787	586	320	1030	335	281	627	973	567	1828	747	128	2181	279	428	2044	614	113	481	7376	281	836	18326	920	1953	221	298	3655	1510	1811	2028	1615	2462	1313	129	499	1539	1157	867	1473	428	184	439	352	1914	1850	448	1450	1711
snoU13_ENSG00000239025.1	9	13	0	12	2	2	5	0	8	7	8	8	4	10	2	3	5	0	3	1	4	7	6	1	2	4	5	0	0	4	6	3	4	5	9	7	1	2	4	10	19	35	16	23	3	5	52	10	5
5S_rRNA_ENSG00000200985.1	28	80	7	28	26	41	30	43	20	24	73	22	18	68	20	9	3	0	12	2	6	6	24	59	8	7	23	16	36	12	83	14	45	76	34	10	27	64	27	19	3	32	22	14	46	9	104	32	24
CCT7P2_ENSG00000249958.1	0	2	4	0	0	2	0	0	0	0	0	1	2	0	12	7	0	2	0	2	1	0	0	0	0	0	142	0	2	18	1	0	1	2	0	19	0	2	0	1	0	1	4	2	0	5	4	0	13
RP4-782L23.2_ENSG00000226883.1	8	2	13	3	16	14	7	1	8	15	27	13	6	6	5	5	5	3	14	13	5	7	8	3	1	4	3	3	9	10	12	16	13	8	6	4	8	9	7	2	32	19	4	2	9	3	7	2	11
CHAD_ENSG00000136457.5	286	421	108	121	285	658	543	65	312	161	438	454	436	652	123	245	318	10	88	313	126	53	525	41	41	251	139	46	441	301	295	168	158	523	232	260	477	734	365	256	488	342	119	79	479	303	231	150	711
TRAM1L1_ENSG00000174599.4	117	22	23	21	19	65	29	4	40	11	80	108	7	176	22	2	20	0	33	44	9	6	49	14	0	2	128	0	78	37	66	148	37	77	33	15	38	41	20	36	70	17	21	14	6	54	86	57	40
SCARNA18_ENSG00000252314.1	2	0	0	0	0	0	1	0	0	1	0	0	1	0	0	0	0	0	2	0	0	1	0	1	0	0	0	0	0	0	0	0	0	0	0	0	0	0	0	0	0	0	0	0	0	0	0	1	0
RP11-662J14.1_ENSG00000258418.1	2	2	0	0	0	0	0	0	0	2	0	0	1	0	0	0	0	0	0	0	0	0	0	7	0	0	0	0	0	0	0	0	2	0	0	0	0	0	0	0	1	2	0	0	0	0	0	0	0
AC021451.1_ENSG00000239214.1	0	0	0	0	0	0	0	0	0	0	0	0	0	0	0	0	0	0	0	0	0	0	0	0	0	0	0	0	0	0	0	0	0	0	0	0	0	0	0	1	0	0	0	0	0	0	0	0	0
TBC1D19_ENSG00000109680.6	517	477	282	424	274	404	445	133	481	272	630	483	337	392	160	172	153	30	146	344	122	102	364	88	108	90	248	69	322	461	588	378	287	526	507	356	176	542	408	261	347	247	220	244	128	363	465	332	298
RP11-255B23.1_ENSG00000224722.3	261	141	239	423	239	334	243	338	229	368	236	230	193	224	315	208	274	307	528	982	498	330	118	98	162	326	339	959	370	267	161	165	254	183	454	372	162	156	198	174	316	141	312	247	218	380	141	351	245
AC092662.2_ENSG00000239548.1	0	0	0	0	0	1	0	0	0	0	0	0	0	0	0	0	0	0	0	0	0	0	0	0	0	0	0	0	0	0	0	0	0	0	0	0	0	0	0	0	0	0	0	0	0	0	0	0	0
ARHGAP26_ENSG00000145819.10	4205	5486	7304	6573	5708	1793	5430	8165	3600	3787	4513	3876	6261	1610	3281	7574	2162	1589	3564	5042	4584	3972	4040	1547	1262	2667	4890	8307	5756	4981	9604	2524	5726	6964	955	5844	4445	2656	7458	3152	4595	4729	5391	1787	3946	7626	2832	5773	5593
ALDH1L1_ENSG00000144908.9	734	124	1820	582	876	6261	3520	2187	1007	438	958	983	409	3051	828	1009	662	38	16	4141	54	2903	151	107	91	0	138	620	278	220	3501	186	1777	5440	1488	2295	2095	371	2758	213	560	187	94	383	1749	1830	1065	79	1421
FAM86B2_ENSG00000145002.8	154	133	158	204	271	63	124	102	206	117	265	335	78	195	101	154	95	5	151	313	82	81	182	36	69	58	96	18	433	369	209	586	99	265	83	273	104	389	322	202	196	452	162	120	349	183	237	266	185
SNORA81_ENSG00000253092.1	8	7	7	7	4	4	4	3	8	3	5	5	5	4	5	6	2	0	3	8	3	4	7	7	0	1	2	0	0	7	12	3	5	7	2	1	3	3	5	7	12	5	5	1	0	7	5	7	3
CTB-31C7.1_ENSG00000236312.3	45	49	28	39	48	50	37	18	65	26	20	27	19	23	11	13	7	2	5	34	3	3	19	19	1	11	25	1	73	12	39	47	36	34	33	4	42	29	29	7	9	14	8	10	43	13	21	40	46
RP11-536C10.16_ENSG00000258364.1	7	5	4	1	5	5	13	7	7	2	2	1	5	3	0	0	1	1	2	6	1	0	3	28	0	0	5	0	3	1	8	4	2	8	3	0	5	13	2	3	4	3	1	0	11	2	11	3	0
RP11-443B7.1_ENSG00000238005.1	24	52	35	42	45	19	24	60	49	17	27	23	32	11	33	30	7	11	22	68	59	27	40	53	15	82	3	25	76	19	36	46	37	27	9	19	38	50	23	43	34	35	3	16	27	28	8	10	49
RPL27P12_ENSG00000239215.1	4	10	3	7	15	10	8	5	10	11	18	9	5	6	7	4	1	2	1	2	8	5	16	2	2	8	0	0	5	5	8	10	16	8	7	3	1	8	7	11	2	4	2	2	12	7	11	13	12
SLC31A1P1_ENSG00000224426.1	6	0	4	6	5	8	5	2	3	2	3	4	3	10	3	5	2	0	9	7	0	0	4	0	4	3	0	2	1	8	1	9	0	0	16	4	4	1	18	8	8	12	1	2	3	4	1	3	1
AC090939.1_ENSG00000244030.1	7	33	12	13	7	8	18	40	14	16	12	12	10	30	2	11	10	6	4	16	6	17	33	43	1	9	4	18	31	8	46	17	4	24	12	14	12	24	6	19	10	6	9	4	48	4	11	14	24
AC078883.4_ENSG00000226963.1	109	317	130	238	185	57	114	190	26	305	113	102	148	458	367	168	166	29	349	228	353	764	203	39	201	304	88	229	202	66	167	52	235	199	688	108	142	267	131	25	56	42	255	63	211	125	61	241	113
RFC1_ENSG00000035928.10	6144	7579	2732	3790	5287	7630	6124	5995	8774	3901	5192	4590	3778	5700	3486	3592	2138	999	2467	6735	2552	2123	2971	2379	1685	2260	4212	3832	6803	2651	7267	4894	4308	8745	4401	2626	3410	7208	3983	2855	2008	2179	2941	1878	4243	5140	4621	5314	3981
CPB2_ENSG00000080618.8	6	26	2	0	5	3	3	4	14	1	51	8	5	0	0	0	1	6	5	2	5	2	11	16	2	0	4	2	3	12	7	1188	7	84	5	6	7	12	13	8	11	7	3	1	1	3	23	3	5
AC140076.1_ENSG00000227309.1	30	8	8	15	18	27	16	10	19	29	23	18	15	18	8	5	20	1	4	5	20	6	18	8	19	4	11	2	18	24	22	20	17	21	13	15	10	9	13	26	22	24	9	12	13	15	7	15	21
U6_ENSG00000252953.1	0	0	0	0	0	0	1	0	0	0	0	0	0	0	0	0	0	0	0	0	0	0	0	0	0	0	0	0	0	0	0	0	0	0	0	0	0	0	0	0	0	0	0	0	0	0	0	0	0
AL592211.1_ENSG00000239972.1	12	35	5	18	12	29	41	22	19	10	36	21	26	17	9	15	8	0	4	9	10	17	49	4	8	7	5	6	16	30	25	25	18	10	13	20	11	47	27	13	13	37	36	5	23	30	35	17	32
AC092812.1_ENSG00000221798.1	0	0	0	0	0	0	0	0	0	0	0	0	0	0	0	0	0	0	0	0	0	0	0	2	0	0	0	0	0	0	0	0	0	0	0	0	0	0	0	0	0	0	0	0	0	1	0	0	0
AL162574.1_ENSG00000196777.1	0	0	0	0	0	0	1	0	1	0	0	0	0	0	0	0	0	0	0	0	0	0	0	0	0	0	0	0	0	0	0	0	0	0	0	0	0	0	0	0	0	0	0	0	0	0	0	0	0
AC007599.1_ENSG00000244663.1	34	60	38	65	44	99	103	51	85	35	77	68	41	23	30	37	29	2	31	53	113	33	34	33	25	69	39	8	29	94	33	19	43	40	43	59	43	37	52	90	91	127	51	22	37	64	47	41	27
RP11-236B18.4_ENSG00000224851.1	0	0	0	0	0	0	0	0	1	0	0	0	0	0	0	0	0	0	0	0	0	0	0	10	0	0	1	0	0	1	2	0	0	0	0	0	0	0	0	0	1	0	0	0	0	0	0	0	0
TAS1R3_ENSG00000169962.4	77	223	68	207	204	203	164	206	126	109	127	163	170	119	83	92	43	5	67	143	72	112	243	25	67	114	74	172	655	120	273	75	191	212	419	146	88	338	406	176	130	309	131	70	415	130	181	464	305
RP11-147K6.2_ENSG00000251285.1	6	2	1	2	2	4	1	0	1	0	4	3	0	0	0	0	1	0	3	2	0	0	0	5	0	0	2	0	0	1	0	0	1	2	3	0	0	0	1	2	1	3	0	0	0	0	1	0	1
RP11-46A10.6_ENSG00000251520.1	26	10	8	6	10	18	10	8	24	8	11	12	24	7	0	3	5	0	6	1	12	19	17	5	10	9	2	5	3	20	6	59	15	8	33	13	15	25	11	19	19	34	9	3	12	16	11	20	16
RP11-851M3.1_ENSG00000240174.1	4	0	1	0	3	0	0	1	0	2	1	0	2	0	0	0	8	4	0	3	4	0	0	0	0	0	0	0	0	1	1	0	0	1	2	7	2	0	2	2	1	0	1	1	0	2	1	2	0
NPAS1_ENSG00000130751.4	56	145	137	162	148	103	185	121	53	119	82	122	164	216	50	109	54	25	169	254	94	345	256	93	58	83	29	92	457	94	196	54	66	112	56	105	493	237	169	29	40	114	370	67	720	257	80	81	241
PIPOX_ENSG00000179761.5	236	59	188	55	76	63	100	28	263	85	278	118	271	29	99	188	80	8	136	47	61	106	46	56	59	310	63	11	361	121	111	98	287	95	53	92	98	121	108	178	122	126	105	71	32	128	385	199	86
RP11-469H8.6_ENSG00000257588.1	18	217	312	372	264	53	35	51	55	52	444	248	274	1	376	282	32	39	58	87	44	10	46	15	37	4	0	216	858	152	646	131	220	382	1	107	152	49	629	236	143	887	105	45	39	241	204	257	154
FAM5C_ENSG00000162670.7	20	129	2	0	2	2	4	0	1	32	12	7	6	15	0	0	1	4	1	4	4	0	21	12	3	2	1	0	0	0	0	0	9	2	0	2	6	0	0	0	0	2	7	9	0	2	24	4	0
RP11-342M21.1_ENSG00000242634.1	20	15	10	12	15	29	33	28	22	10	18	11	28	24	9	17	8	5	5	10	7	9	25	48	6	10	17	33	13	4	30	6	31	40	13	6	26	29	7	5	1	11	12	3	24	32	25	19	7
ACAD8_ENSG00000151498.6	1916	1716	1208	1321	1715	3267	1588	2504	3460	931	2760	2487	1921	1856	641	1161	897	63	937	1212	802	379	1884	1252	633	447	3938	655	1028	2756	2385	971	1959	2024	1170	2255	1797	2551	2111	3520	2665	2133	1964	895	3014	1649	2206	1863	2096
CTD-2012J19.1_ENSG00000232615.3	142	196	90	157	144	109	142	217	227	148	181	114	174	187	182	85	69	13	60	231	112	96	234	74	85	105	107	73	249	146	170	155	144	177	107	157	162	252	124	142	155	108	113	45	144	180	112	168	192
snoZ39_ENSG00000199262.1	269	249	120	143	229	359	305	393	238	143	189	184	195	297	67	278	72	32	73	394	45	105	287	89	26	249	127	65	356	129	386	322	365	211	122	43	303	439	193	90	39	35	116	52	294	328	246	289	338
AC010731.6_ENSG00000213083.3	5	0	0	2	0	0	0	0	2	1	0	2	0	0	0	0	2	0	4	0	0	0	0	5	0	0	0	0	0	3	0	0	0	0	1	0	0	0	0	0	0	0	0	0	0	0	0	1	0
CDK14_ENSG00000058091.12	1626	1362	439	2376	549	2924	2587	167	676	850	1635	1154	1046	3732	171	485	231	54	231	354	204	53	2338	275	223	33	259	71	665	1046	3041	1810	1287	2618	2423	526	298	1409	1083	595	522	361	413	711	172	582	1815	608	1244
RP1-290I10.6_ENSG00000229950.1	66	126	197	291	92	343	249	274	52	127	86	270	77	202	69	101	48	39	95	316	165	109	57	29	141	135	2	60	96	78	97	203	242	45	95	93	84	132	133	75	57	146	279	53	78	145	78	185	135
RP11-1060G2.1_ENSG00000257283.1	16	11	19	8	13	17	3	12	20	17	17	4	9	7	12	13	16	1	21	15	6	9	19	2	3	13	12	6	14	13	10	11	10	8	13	15	16	15	13	19	39	32	13	9	31	3	21	23	7
RP11-666A1.3_ENSG00000226675.1	28	25	28	42	56	20	15	17	29	14	25	40	32	15	26	25	11	2	71	32	45	23	34	6	37	7	11	8	16	24	14	113	28	12	8	22	37	27	36	61	24	48	23	35	23	45	17	21	19
RP11-182I10.2_ENSG00000233877.1	37	29	15	14	23	24	20	9	29	26	51	22	34	18	12	17	4	2	7	18	11	10	41	36	27	13	12	17	30	17	65	11	53	33	12	8	29	17	20	22	2	30	22	13	28	24	37	21	42
SNX10_ENSG00000086300.11	2474	227	243	397	944	530	711	233	700	318	1060	296	1112	866	108	263	146	57	69	277	93	42	211	894	64	161	1496	22	388	327	1155	1357	1695	935	282	219	927	600	734	388	167	80	310	689	139	566	530	1055	583
FDPSP4_ENSG00000254793.1	2	0	22	2	17	12	8	17	4	4	0	15	4	2	35	3	4	0	15	8	8	79	0	5	7	19	20	43	4	7	5	6	2	3	5	8	2	5	3	14	9	4	2	10	2	2	2	0	4
AC108066.1_ENSG00000223373.1	0	0	0	0	0	1	0	0	3	0	0	0	0	2	0	0	0	0	2	0	0	1	0	5	0	0	0	0	0	0	0	2	0	3	0	4	0	1	1	0	0	0	0	0	0	1	1	0	0
DHX40_ENSG00000108406.4	2046	2719	580	1339	947	1168	2209	1463	1553	881	1972	1105	821	1982	640	480	413	187	785	2314	365	417	1220	2111	325	502	1877	1212	2436	893	3597	1582	1889	2784	1214	635	1448	2541	969	1172	667	922	1117	699	2028	1696	2196	1514	1309
GIMAP4_ENSG00000133574.4	947	409	363	182	907	281	456	570	2269	477	481	228	470	189	312	180	133	71	81	220	231	110	460	251	237	76	864	45	259	251	487	262	1640	799	97	73	255	221	846	995	192	171	409	505	155	328	685	1893	293
DOCK1_ENSG00000150760.8	4387	7441	2764	4592	4348	3706	4407	4144	5196	3750	6754	2972	6365	4713	2666	4430	1193	463	2384	2911	2862	1536	6261	1061	1359	1883	2251	2008	3659	4309	7845	3962	5115	7336	4849	9376	5576	5456	4882	4410	4001	6790	4249	2356	4564	4958	6965	3994	5248
7SK_ENSG00000222543.1	1	0	0	0	0	0	0	0	0	0	3	0	0	0	0	0	4	0	0	0	0	0	0	1	0	0	0	0	2	0	0	0	0	0	0	1	0	0	0	0	0	0	1	0	0	0	0	1	0
RP11-490H24.5_ENSG00000216285.4	1423	3761	351	1200	620	1712	1527	2451	844	332	2124	395	1401	1976	335	655	176	121	238	713	121	178	2604	2125	144	901	782	1570	2245	611	4191	811	2248	2542	2568	226	2261	3451	1374	808	460	710	1139	593	4554	3602	4031	1693	1298
U6_ENSG00000207318.1	1	0	0	0	0	0	0	0	0	0	0	0	0	0	0	0	0	0	0	0	0	0	0	3	0	0	1	0	0	0	0	0	0	1	0	0	0	0	0	0	0	0	0	0	0	0	2	0	0
TARDBP_ENSG00000120948.10	6239	5734	3026	5104	4856	12339	7128	9306	6938	4328	6609	5553	5383	5402	2631	3488	2356	287	3373	8900	3145	1830	5533	3731	1563	4467	5486	2126	7906	6386	9359	5029	7289	7843	4913	3992	6041	6225	6477	6790	4933	6787	4006	1959	7630	8460	6904	7023	6381
AC040975.1_ENSG00000239637.1	21	21	2	14	13	11	8	21	7	12	12	8	10	31	4	4	6	0	6	9	6	7	18	10	2	4	6	6	24	8	33	7	13	42	9	11	21	32	21	13	13	28	12	9	32	37	25	16	16
TP53TG3B_ENSG00000205457.5	14	0	2	32	0	22	9	0	0	0	10	17	5	1	3	6	0	6	2	0	0	4	12	57	0	4	118	0	2	0	29	39	10	6	4	4	0	7	0	5	3	12	44	34	11	7	53	12	4
B4GALT5_ENSG00000158470.5	3013	6119	1036	1996	1157	7624	5357	5525	2597	2325	4652	2845	3331	8786	718	3025	691	92	1254	4359	1500	596	4270	1560	306	703	5799	574	4399	2511	6673	2074	3826	6966	977	2057	2394	7790	2615	1125	958	1454	1169	693	3285	6613	5293	2201	2607
RP11-140A10.3_ENSG00000235010.1	14	3	10	13	0	13	5	1	15	8	26	10	4	2	0	14	18	0	13	67	3	2	7	0	12	1	16	0	7	35	13	6	18	6	5	24	3	33	10	66	47	29	8	8	4	19	37	41	14
RP11-276H19.1_ENSG00000226237.1	17	14	9	28	16	42	17	0	57	16	47	9	37	13	10	4	27	1	36	2	5	2	15	58	2	2	8	0	7	5	23	41	4	47	21	7	5	5	18	17	14	9	13	36	1	14	38	20	15
HIST1H2BL_ENSG00000185130.4	4	12	2	0	2	13	23	9	3	0	2	4	12	5	7	9	4	1	1	11	7	7	11	5	0	4	0	0	7	3	0	17	5	1	2	6	35	6	4	0	0	6	0	0	7	13	2	10	5
OR4A14P_ENSG00000254962.1	2	2	12	1	5	9	2	0	7	8	5	8	14	2	5	8	4	1	9	4	7	5	2	11	19	4	9	7	5	4	0	7	2	1	6	26	2	1	3	2	14	5	4	2	3	0	2	2	4
IL17B_ENSG00000127743.5	10	5	8	7	15	9	8	6	24	7	31	23	8	2	22	19	5	2	9	25	7	5	12	11	15	2	16	2	8	21	12	3	9	5	14	1	4	21	9	39	13	22	15	37	0	5	80	22	4
RP11-149J18.1_ENSG00000227613.1	0	0	0	0	0	1	2	0	0	0	2	0	0	2	0	0	0	2	2	0	0	0	0	11	0	0	2	0	0	4	0	0	1	0	0	0	2	0	0	0	0	0	0	0	0	0	0	0	0
U6_ENSG00000202205.1	9	9	3	3	10	3	11	4	17	6	13	9	7	9	7	5	2	0	8	3	2	9	8	8	3	9	1	4	4	6	8	9	11	4	5	8	6	7	7	9	6	4	5	4	7	3	11	9	10
SNORA74_ENSG00000223111.1	109	167	56	70	82	75	188	132	139	39	115	67	140	130	73	93	26	4	63	30	56	41	123	54	76	76	35	58	124	113	126	85	109	94	79	95	113	164	90	104	165	188	112	51	113	182	133	94	139
RP11-107P7.5_ENSG00000254993.1	0	0	0	0	0	0	7	0	0	2	0	0	0	0	0	0	0	1	0	0	1	1	0	5	0	0	0	0	2	0	0	0	4	0	0	0	0	0	0	0	0	0	0	1	1	0	0	1	0
U6_ENSG00000222249.1	3	3	2	0	1	4	2	6	4	1	6	5	4	3	0	3	0	0	2	6	3	0	7	1	4	0	1	0	2	2	2	4	1	2	1	1	8	3	2	4	0	0	1	1	5	2	2	8	4
RP11-318G21.2_ENSG00000236133.1	0	0	0	0	0	0	0	0	0	0	0	0	0	0	0	0	0	0	0	0	0	2	0	1	0	0	0	0	0	0	0	0	0	0	0	0	0	0	0	0	0	0	0	0	0	0	0	0	0
RP11-481A12.6_ENSG00000229464.1	40	34	35	24	45	18	84	47	68	11	50	44	65	33	53	54	24	4	54	10	46	32	31	11	63	24	17	34	36	68	38	28	30	32	43	69	29	50	46	67	134	137	92	32	37	118	60	35	69
NECAP1_ENSG00000089818.11	2436	2078	888	1200	1453	2448	1668	1655	1271	940	1698	809	953	1253	295	477	583	143	653	951	527	107	1427	1877	339	1044	1174	707	2136	1123	2207	1045	1747	3555	1327	960	2045	1791	1690	1789	1630	1528	1158	468	1962	1541	1186	2117	1703
EPS8L2_ENSG00000177106.9	22538	73061	20428	37236	39531	38610	97907	29325	15355	31820	42371	74062	46947	83476	19898	28052	24562	2725	34368	66893	49551	20669	76922	13106	20964	24528	1531	20284	37480	64471	53846	44399	54859	31646	45495	123102	73603	89826	101179	18064	50542	35164	72980	21976	53847	37945	25342	36971	59240
NDUFA12P1_ENSG00000225999.1	0	0	0	0	2	0	0	0	0	2	0	0	0	0	2	1	2	0	2	0	0	0	0	2	0	0	0	0	0	0	0	0	0	0	0	0	0	0	0	0	0	0	0	0	0	0	0	0	0
EAF1-AS1_ENSG00000249786.1	113	174	42	88	39	53	71	125	70	36	108	46	87	111	17	35	9	3	10	21	10	9	87	183	16	9	97	90	80	55	230	52	97	242	52	21	72	85	56	92	29	50	74	30	111	116	122	61	82
AC009237.10_ENSG00000233037.1	3	0	6	2	3	5	0	0	2	1	1	6	1	0	13	4	0	0	12	1	5	13	0	6	2	0	5	11	0	0	1	14	4	0	0	1	2	3	1	0	2	2	3	1	0	4	1	0	2
Z97634.5_ENSG00000236829.4	113	112	166	226	345	360	268	130	108	102	386	214	256	377	240	162	189	110	217	234	889	738	106	26	98	38	84	218	126	271	178	340	266	110	89	198	190	223	147	138	309	380	130	200	171	69	151	105	183
ZMYM6NB_ENSG00000243749.1	957	688	300	362	391	1235	695	335	888	409	709	502	744	797	75	440	237	19	144	636	109	72	967	123	73	145	290	40	1132	476	1491	463	967	1006	313	232	764	849	885	370	217	244	320	141	811	1069	645	645	821
SERTAD4_ENSG00000082497.7	277	602	186	222	457	1238	458	1020	1725	167	887	348	178	357	207	128	64	13	67	365	183	667	799	180	151	372	39	468	667	203	1311	444	393	319	88	97	139	303	189	171	208	403	298	80	71	204	1075	201	259
RP11-379I19.1_ENSG00000253260.1	2	0	6	0	1	0	1	0	0	0	2	1	2	0	6	0	0	0	1	0	1	2	10	11	2	0	0	0	4	9	0	3	0	0	2	10	0	0	3	0	5	1	1	2	0	3	1	0	3
PDPN_ENSG00000162493.12	322	1479	116	1952	229	715	381	144	70	1420	1347	399	269	79	226	168	33	25	102	461	117	78	332	102	32	226	46	53	103	484	2309	1511	670	234	8535	78	532	235	540	303	179	393	403	193	95	359	1493	458	349
WNT2_ENSG00000105989.4	135	165	73	723	20	243	251	12	0	254	108	96	167	3	0	101	4	23	8	42	46	8	195	10	2	66	0	8	31	85	1495	466	227	59	238	42	192	175	325	34	40	50	201	59	125	160	224	128	285
U6_ENSG00000206922.1	5	1	0	0	0	2	1	0	0	2	1	1	0	0	9	0	1	0	1	0	0	2	0	5	0	4	0	1	1	0	0	0	2	0	0	0	2	0	2	2	0	1	0	2	1	0	0	0	0
TRGJ2_ENSG00000211687.1	2	0	0	0	0	0	1	0	0	0	0	0	0	0	0	0	0	0	0	0	0	0	0	4	0	0	0	0	0	1	0	0	0	0	1	0	0	0	2	1	0	0	0	0	0	0	2	10	0
AL136304.1_ENSG00000240625.1	7	14	10	11	16	6	10	4	21	5	17	11	10	3	24	2	9	0	2	6	8	12	7	5	5	6	6	1	4	12	2	6	9	6	4	11	3	7	5	13	6	7	3	0	4	0	8	10	11
RP11-405K6.1_ENSG00000254456.1	1	1	0	0	0	0	0	0	0	0	0	0	0	0	0	0	0	2	1	0	0	0	0	11	0	0	0	0	1	0	0	0	1	0	2	0	0	0	0	0	0	1	0	2	0	0	0	0	0
MIR758_ENSG00000211582.1	0	0	0	0	0	0	0	0	0	0	0	0	0	0	0	0	0	0	0	0	0	0	0	0	0	0	0	0	0	0	0	0	0	0	0	0	0	0	0	0	0	0	0	0	0	0	0	1	0
CTD-2325P2.4_ENSG00000259038.1	13	2	5	11	15	47	47	3	8	8	5	40	0	10	10	10	6	5	12	10	7	1	1	3	3	2	11	0	19	8	3	4	8	10	5	6	5	15	5	3	0	0	3	4	4	3	5	1	0
RNY4P7_ENSG00000201470.1	14	15	7	8	9	26	13	26	15	13	18	16	18	42	6	9	2	0	14	1	6	4	20	19	3	11	8	7	13	3	29	15	18	21	10	6	38	23	17	9	1	8	11	2	25	9	18	20	10
7SK_ENSG00000222762.1	0	0	4	0	3	3	4	1	0	3	1	4	0	0	4	0	0	0	3	0	0	0	0	3	0	0	0	0	0	0	0	0	0	5	0	0	0	5	2	3	5	2	0	0	1	0	0	0	0
VTRNA1-2_ENSG00000202111.1	1	0	0	2	0	0	1	0	0	0	0	0	0	0	0	0	0	1	0	3	0	0	0	0	0	0	0	1	0	1	0	1	0	0	0	0	0	0	0	0	0	0	1	0	0	1	0	1	1
AC016700.5_ENSG00000231327.1	18	4	7	3	9	38	11	20	6	9	7	6	13	4	17	2	13	0	24	19	7	9	11	12	6	31	14	4	22	11	7	11	29	19	6	7	15	27	3	15	10	18	9	5	3	6	10	22	13
AC027097.1_ENSG00000241426.1	18	37	12	7	19	16	19	55	24	19	21	3	29	36	7	8	9	1	4	8	14	9	44	23	11	7	15	31	24	38	49	22	18	45	7	11	27	22	14	11	15	13	11	9	35	30	30	14	16
TLE6_ENSG00000104953.11	444	487	690	857	412	357	1649	21	1324	333	482	565	324	313	46	509	673	12	316	1557	205	597	179	74	158	635	902	71	649	591	503	719	678	322	222	853	94	125	400	664	700	491	590	226	1351	680	423	761	880
JUP_ENSG00000173801.11	77984	205076	16936	107131	30456	186957	113358	178800	29622	48303	41105	67767	139498	804828	11534	67668	17831	6084	77834	95024	40299	8788	357689	86424	28718	81132	10492	31214	249477	61809	181645	68204	185741	133573	560125	51817	119315	337910	125683	41496	36686	52204	63731	24039	193933	122976	44966	36715	96512
GPR68_ENSG00000119714.6	564	1319	455	2080	587	1706	1191	325	393	395	869	952	615	1231	228	558	263	28	870	420	570	1462	442	43	336	610	143	22	294	804	3254	1137	1518	394	6937	368	257	1475	1250	1001	607	1337	790	878	1174	563	1554	906	541
RP11-438O11.1_ENSG00000215805.2	2	0	0	0	0	3	2	0	0	0	0	0	0	0	1	0	0	1	0	2	2	2	1	13	0	0	0	2	0	0	0	0	0	0	2	0	0	0	0	0	0	0	0	2	0	0	0	0	0
RP11-360O19.1_ENSG00000216359.1	0	0	3	0	0	8	2	1	1	2	0	13	0	2	2	0	0	4	0	3	2	1	0	4	0	0	0	0	1	0	4	2	0	3	3	0	30	20	0	0	1	9	1	0	0	2	2	2	3
NPM1P4_ENSG00000226703.1	0	0	2	0	0	0	0	0	0	0	1	0	0	0	0	2	0	1	0	0	0	0	0	9	0	0	0	0	1	0	0	0	0	0	0	0	0	0	1	0	0	2	0	0	0	0	1	2	0
AL161915.1_ENSG00000212670.1	59	47	55	32	84	90	65	51	163	44	144	111	60	45	54	52	19	15	68	210	45	46	52	18	37	75	46	18	40	82	68	67	73	106	64	45	35	63	106	96	70	133	51	35	82	52	119	66	106
RP11-641A6.3_ENSG00000257700.1	30	339	6	18	6	88	27	123	6	0	0	36	6	858	2	48	0	0	1	84	0	0	129	9	0	0	0	0	42	12	31	0	6	93	569	0	47	253	36	0	0	0	0	0	36	334	21	15	66
RP11-43D2.3_ENSG00000250005.1	40	19	33	7	31	40	34	14	51	21	26	73	35	83	12	21	28	2	52	24	19	5	6	8	3	29	23	1	17	29	24	42	17	50	21	30	46	22	17	26	20	38	35	15	22	12	21	29	42
SNX5P1_ENSG00000249858.1	9	3	3	0	4	5	1	0	6	4	6	5	7	3	2	0	6	0	2	0	3	1	3	5	2	0	0	2	1	2	6	10	2	19	6	1	2	3	2	8	6	6	1	0	3	4	4	8	4
AC009892.5_ENSG00000238094.1	4	2	0	0	30	1	0	0	16	2	10	0	14	0	2	0	1	7	0	20	1	2	0	4	8	0	12	0	0	8	2	0	4	0	2	3	8	0	12	44	6	0	10	0	0	0	0	16	4
CTSL1P5_ENSG00000228745.3	39	7	6	5	33	6	59	5	36	7	36	50	25	3	19	11	46	3	32	18	9	1	3	19	15	4	28	1	27	52	7	53	9	42	2	9	30	9	17	17	36	21	22	8	3	15	8	9	44
U2_ENSG00000252604.1	0	0	0	2	2	0	2	0	1	0	1	0	0	0	2	0	0	1	3	0	1	4	5	0	0	0	0	1	0	1	0	0	0	0	1	2	0	0	1	2	0	0	1	1	1	0	0	0	0
IGLV1-47_ENSG00000211648.2	24	5	14	39	234	53	1	105	164	53	17	32	19	5	5	28	1	5	10	62	49	10	166	6	43	180	5	4	71	32	128	1	102	60	2	0	195	6	454	63	9	19	59	8	812	68	84	871	212
NEDD8_ENSG00000129559.7	1969	3416	910	1462	1412	1735	3618	3233	1865	1281	1398	1468	2152	1979	488	1751	506	99	1061	2679	479	705	3881	1125	350	924	1318	527	4038	1304	2946	1455	2159	2777	1623	641	3139	3428	2079	912	774	884	886	597	2987	3510	1838	1930	2398
ECM2_ENSG00000106823.8	670	393	399	633	356	475	802	127	1121	434	572	537	362	159	216	158	113	15	122	206	242	70	342	183	93	134	318	44	280	359	1084	955	843	560	239	193	177	435	435	308	452	519	519	518	246	419	1169	770	548
B3GNT4_ENSG00000176383.8	999	1282	550	1075	940	1002	1055	1274	662	419	735	802	540	955	391	972	308	51	1048	2873	493	275	1244	458	337	850	655	264	1474	1069	1319	953	1198	1144	1073	252	812	1399	1182	480	565	581	563	283	1483	627	670	916	863
TBC1D13_ENSG00000107021.11	2305	2949	1012	1494	1515	2987	3006	2747	2110	970	2723	1691	2382	1935	1391	1799	1175	94	774	3340	726	909	4411	1640	735	712	2683	623	2214	2085	3270	1760	2756	3771	1992	2116	1312	4245	1810	2057	2778	2582	2503	1544	2159	3364	4038	2167	3067
FSCN2_ENSG00000186765.7	192	136	334	337	674	169	313	485	129	249	214	211	784	190	297	198	389	15	157	695	306	647	1534	53	383	249	64	883	390	272	147	656	248	292	107	347	642	299	572	316	179	308	195	335	639	174	168	234	201
HTR2A_ENSG00000102468.5	30	21	8	10	5	427	9	3	1	6	60	4	9	4	2	12	6	4	10	6	0	3	14	37	2	0	14	0	7	3	24	31	32	11	15	13	3	3	18	8	31	20	6	16	4	24	92	32	1
CTD-2517M22.9_ENSG00000255456.1	28	33	8	15	21	29	29	43	17	9	26	46	34	30	29	38	10	0	10	43	26	27	13	18	12	19	9	12	19	18	41	17	22	26	34	63	14	52	31	29	40	69	40	47	36	17	26	32	58
AL356534.1_ENSG00000248650.2	12	14	10	9	3	10	11	4	3	11	116	14	10	3	30	3	11	6	8	3	9	8	5	32	0	9	6	1	3	3	10	12	14	5	9	2	0	3	5	13	3	38	2	15	3	2	83	17	6
AC106864.2_ENSG00000244742.1	44	45	31	42	51	50	45	53	41	49	35	44	31	42	22	34	20	3	23	59	21	19	28	17	16	14	39	15	63	38	37	52	36	45	26	35	82	41	45	43	26	48	46	10	21	64	40	56	37
LYN_ENSG00000254087.2	2868	2369	1126	1437	2211	3740	2480	1861	2029	1151	2472	1028	2566	2072	1566	1306	350	183	546	1300	434	613	1485	5768	610	749	682	693	3210	1082	3029	2748	4476	2468	752	929	1664	2167	1615	1417	665	670	1610	858	3549	2656	1232	2529	2438
FLT3_ENSG00000122025.10	170	20	19	14	72	25	67	2	11	39	191	10	18	19	5	25	91	4	9	19	16	5	5	32	13	5	66	1	22	26	31	11	126	1198	4	48	21	39	126	199	37	6	9	48	7	16	35	67	154
TBCA_ENSG00000171530.8	2434	1613	1151	1257	1754	3599	2563	2025	2380	1618	1451	1550	1591	2694	998	1532	684	211	682	3040	548	839	1757	672	201	1460	1701	819	1801	766	2112	2902	2746	1372	1442	417	2206	3313	1325	768	470	469	937	602	1727	2757	1191	2892	2153
RP11-69C13.1_ENSG00000255871.1	56	17	314	17	77	89	54	36	64	205	39	133	56	1	163	63	40	88	235	243	414	33	31	38	99	135	465	20	19	132	24	205	30	25	3	174	54	18	98	108	15	31	28	35	15	23	6	48	65
OR7A17_ENSG00000185385.2	0	0	0	0	0	0	0	0	0	0	0	0	0	0	0	0	2	1	3	1	0	2	0	5	0	0	0	0	0	0	0	0	0	0	2	0	0	0	0	0	0	0	0	0	0	0	1	0	1
RP11-414C16.1_ENSG00000233216.1	1	0	0	0	2	0	0	1	0	0	0	2	4	0	0	0	0	4	0	0	0	5	0	0	0	0	0	0	0	3	1	1	0	9	1	2	2	0	2	0	0	8	2	1	0	0	1	3	0
AC011510.1_ENSG00000239868.1	67	169	36	62	67	93	157	133	66	43	130	37	95	200	22	66	28	1	19	32	38	20	110	81	16	75	26	40	82	47	174	47	94	121	40	31	114	122	52	56	20	42	67	41	141	44	142	68	66
EPB41L4A_ENSG00000129595.7	2348	2369	1597	1114	2192	1402	2856	616	2951	1509	2053	2616	2574	1634	1445	1405	1177	429	1803	2037	874	1019	1187	550	516	369	3780	1176	1813	3119	2687	1538	2038	2847	496	1630	1896	2995	2338	879	2333	1526	1208	1047	280	2139	1185	1078	1394
GZMH_ENSG00000100450.6	35	7	16	21	61	13	41	636	190	31	45	30	17	1	53	42	6	6	0	47	38	47	8	0	20	79	21	0	38	75	54	102	105	25	9	8	59	6	124	88	16	3	17	50	55	30	27	445	132
RP11-563N6.6_ENSG00000228403.1	6	1	0	4	13	4	6	1	13	1	2	0	12	0	2	4	0	0	0	6	0	0	2	1	11	2	11	0	0	1	5	9	25	2	8	1	5	1	5	65	4	0	3	4	0	2	0	18	7
DCAF10_ENSG00000122741.11	2651	3533	1134	1527	1662	2295	3775	2446	2244	1185	3325	1543	2010	3058	1093	1639	808	62	699	833	703	711	3104	1945	476	1272	1882	800	3609	1431	4263	3483	1830	2893	1970	658	1535	2177	1947	959	1297	1184	1547	832	1847	3180	3230	2173	1854
RP11-475N22.4_ENSG00000244300.2	299	140	152	239	1071	463	137	435	291	574	417	67	795	379	76	205	214	22	362	1203	60	1591	126	82	522	7	82	361	438	357	146	690	234	262	90	179	454	168	106	274	111	427	444	183	63	71	147	400	185
HDAC4_ENSG00000068024.11	1107	1156	864	1902	1011	1225	1092	1062	1122	1210	3077	1125	991	1215	1361	1048	514	62	746	920	795	1906	1865	599	351	661	1615	1466	692	1014	1373	1180	1511	1511	1033	1068	1225	920	775	1703	1010	1939	1053	749	1376	811	7453	1308	1189
TYRO3_ENSG00000092445.4	1170	1620	339	919	1255	2254	1434	2609	627	978	1385	499	1681	1780	336	1313	426	67	448	592	524	188	6325	369	248	1168	198	393	899	593	2630	1542	1886	4886	4116	573	1494	1990	1074	505	609	843	689	665	4226	1445	1781	615	2041
AB019438.66_ENSG00000228757.1	12	0	21	104	87	8	0	71	8	30	0	9	1	0	0	0	0	3	2	8	0	2	26	2	0	6	15	0	8	4	35	0	21	57	6	0	45	23	38	5	6	19	10	0	357	15	17	368	86
RP11-864N7.1_ENSG00000241097.1	0	0	0	0	0	1	0	0	0	0	0	0	1	0	0	0	0	0	0	0	0	0	0	10	0	0	0	0	0	0	0	0	0	0	0	0	0	0	1	0	0	0	0	0	0	0	0	0	0
TANC2_ENSG00000170921.9	3097	2376	1479	3892	1436	1514	2788	596	2620	1667	2615	2579	1342	8269	1746	1255	630	60	1271	2642	363	934	8099	543	578	60	659	475	1907	1802	3505	2190	1545	2247	9263	2999	807	5117	1610	2458	2301	1674	1536	758	2816	2588	2689	1303	1660
C11orf57_ENSG00000150776.12	1575	1455	1295	1231	1422	2040	1632	1940	1944	1426	1514	1341	2070	1553	1373	1127	593	348	571	2024	971	581	1377	715	546	1038	1122	779	2170	1003	1743	1637	1805	1554	1025	545	1696	2784	1306	676	556	527	952	512	1406	1413	1062	1257	1316
OR5E1P_ENSG00000170688.3	2	6	0	0	4	7	6	0	0	10	1	20	0	8	2	8	2	0	1	4	0	0	0	0	13	2	0	3	6	0	1	0	0	0	22	6	2	27	0	0	2	8	0	0	0	0	0	0	1
IFI27L1_ENSG00000165948.6	370	503	240	309	314	489	770	249	374	211	220	285	305	335	179	229	178	12	455	654	124	107	169	39	80	255	249	41	336	366	212	209	248	277	204	464	561	548	456	284	324	287	214	124	272	702	296	294	692
TICAM2_ENSG00000243414.4	561	1341	206	446	337	638	687	562	762	282	1053	343	591	1236	121	157	102	29	110	246	74	149	562	254	36	146	318	123	380	226	1479	475	823	1003	728	156	709	990	549	269	196	192	287	169	669	504	1007	650	611
RP11-19O2.2_ENSG00000250448.1	2	0	0	0	0	0	0	0	0	0	0	0	2	0	0	3	6	2	0	0	0	0	0	11	0	0	17	0	0	0	1	0	0	6	2	0	0	0	0	0	0	0	0	0	0	0	0	0	1
RP11-631G24.1_ENSG00000230040.1	4	0	0	2	2	0	1	0	0	0	0	0	0	0	4	0	0	1	0	4	0	0	0	14	0	0	4	0	0	0	0	0	0	0	0	0	0	0	0	0	3	0	2	0	0	0	0	0	0
AC092675.3_ENSG00000222000.3	4	2	2	2	0	0	2	0	2	1	0	4	8	0	0	2	2	3	5	3	1	0	6	5	2	1	6	0	3	1	6	1	0	2	0	0	2	6	3	8	0	2	0	2	1	0	0	6	3
MYL7_ENSG00000106631.4	30	0	18	14	16	6	2	0	14	4	38	30	0	0	6	30	50	2	6	22	13	4	1	0	0	0	9	0	29	17	8	0	57	6	20	15	4	7	11	240	312	8	57	13	6	26	35	54	16
SLC2A6_ENSG00000160326.9	1485	1639	881	2104	971	1459	721	434	853	716	955	498	1230	1017	101	1890	524	56	627	2023	431	502	2041	366	586	72	380	614	789	931	2242	1836	2341	1034	511	1165	672	1282	1015	1707	1029	390	1516	740	945	3839	959	1198	1197
AC005846.1_ENSG00000240533.1	32	28	3	13	16	3	5	4	8	5	26	7	9	2	3	6	5	0	3	1	5	4	22	0	4	0	18	0	2	10	24	2	21	31	8	6	6	3	13	8	2	12	8	14	4	5	40	21	6
CCDC155_ENSG00000161609.4	5	6	0	3	1	10	156	42	0	2	10	3	0	8	3	1	54	5	1	9	1	19	0	14	2	0	1	0	3	8	0	0	0	46	64	1	0	82	7	8	0	0	0	0	44	8	3	16	13
AL117333.1_ENSG00000221328.1	2	0	0	0	0	0	0	0	1	0	0	0	0	0	0	0	0	0	0	0	0	0	0	3	0	0	0	0	0	0	0	0	0	0	1	0	0	0	0	0	0	0	0	0	0	0	0	0	0
BTBD11_ENSG00000151136.10	167	268	98	188	250	278	108	175	76	83	304	415	119	4	20	61	81	16	615	139	13	28	44	32	10	70	63	25	131	82	452	122	150	114	509	40	3	1794	272	264	70	82	156	67	22	134	378	246	49
AC092168.3_ENSG00000234169.1	0	0	7	0	3	1	0	0	2	0	0	5	0	1	0	0	2	0	0	0	2	0	0	10	6	0	0	0	0	1	0	12	3	0	1	0	2	1	2	0	2	6	0	0	0	0	0	0	0
DNAJA2_ENSG00000069345.5	1972	3233	799	1359	1567	4609	2953	2641	1519	1192	2936	1155	2403	1887	764	731	421	156	537	1036	751	427	2705	1748	404	1164	1175	1105	2733	1184	3524	1428	2733	2563	1173	678	2533	3021	1853	1253	509	1014	1215	557	1756	2576	2843	1650	1589
BX284650.1_ENSG00000223804.1	393	231	342	315	280	332	382	241	512	261	387	410	811	262	122	325	401	69	507	546	401	216	614	122	198	142	216	28	313	337	423	660	652	193	177	310	404	334	358	369	319	263	195	203	43	233	265	388	407
VLDLR_ENSG00000147852.9	1170	417	242	433	122	412	373	477	301	386	1494	435	153	489	270	751	477	18	249	149	68	76	671	148	153	15	292	200	703	401	738	855	365	1304	526	412	97	343	233	500	481	368	356	174	50	521	1864	511	403
MIR1278_ENSG00000221680.1	20	21	9	14	16	18	24	25	16	22	33	8	21	44	8	4	10	2	13	13	21	30	25	28	10	21	28	105	22	19	57	25	20	43	8	8	32	17	22	12	7	13	21	8	16	14	26	21	13
AC105285.2_ENSG00000241652.1	0	0	4	0	0	1	3	4	0	0	3	4	5	3	2	1	0	0	3	3	0	5	0	0	4	0	0	0	0	0	0	0	0	2	2	0	0	2	1	1	0	2	0	0	2	0	5	5	4
BTF3P2_ENSG00000258282.1	23	62	9	20	17	38	31	29	15	3	24	17	27	25	8	19	0	0	7	17	1	4	32	27	4	11	5	6	59	3	30	13	28	30	14	3	27	51	13	12	3	6	19	8	32	32	29	31	32
TRAJ10_ENSG00000211879.1	1	0	0	1	9	1	4	33	13	2	4	2	0	0	0	3	1	0	0	0	0	0	0	0	4	2	13	0	0	3	6	8	41	1	0	1	6	2	8	58	4	2	0	3	7	0	4	36	5
H1FOO_ENSG00000178804.3	0	0	0	0	0	0	0	0	0	0	2	2	1	0	0	0	0	0	0	1	2	0	0	0	1	0	0	0	0	1	0	0	0	0	2	0	0	0	0	0	0	0	0	5	1	0	0	0	0
ROPN1_ENSG00000065371.12	3	4	6	4	12	6	4	8	10	11	5	6	3	7	4	6	0	4	2	11	0	4	1	25	4	0	0	0	14	2	10	7	4	8	4	11	5	18	2	13	0	4	0	8	4	13	4	3	8
RP11-465N4.4_ENSG00000234678.1	374	641	479	471	424	500	506	910	230	529	560	378	839	494	305	533	197	33	621	467	587	328	1107	466	350	525	165	374	740	589	1108	761	925	737	209	529	1032	645	460	334	344	711	449	199	664	640	356	367	885
KRT15_ENSG00000171346.8	1632	7817	1701	2425	6284	3195	4483	4362	395	623	3237	31931	3892	4660	1520	10348	413	366	16166	4744	5779	143	2477	2037	880	1028	142	280	6126	9908	2640	1098	9683	1547	4088	18783	4822	25846	5755	3135	5813	8761	2164	8299	915	7493	2275	2330	3474
SPATA5_ENSG00000145375.6	192	251	80	241	272	323	372	381	295	160	335	335	289	359	161	119	76	17	115	208	131	153	131	248	126	60	232	217	204	277	381	185	176	272	356	333	241	270	224	151	189	213	216	124	431	209	229	638	223
DBN1_ENSG00000113758.9	13342	19709	3883	12940	7149	12546	8274	702	10788	4972	14239	6698	21556	20781	4591	14751	3540	283	4187	24543	3485	7130	37911	1122	5054	3868	11789	7042	4142	14408	24789	17339	19663	12369	8810	4677	14848	16281	24965	7927	6522	10234	5114	5025	2276	8809	20735	7592	19287
RP11-331H2.3_ENSG00000227667.1	0	0	0	0	0	0	0	0	0	0	0	1	0	0	1	0	3	1	0	0	0	0	0	1	0	0	0	0	0	2	0	0	0	0	1	0	0	0	0	0	0	0	0	4	0	0	0	0	0
RP11-158I9.1_ENSG00000254478.1	0	0	0	0	1	0	0	0	1	0	1	0	0	0	0	2	0	0	0	0	0	0	0	0	0	0	0	0	0	0	0	0	0	1	0	0	0	1	0	0	0	0	0	0	0	0	0	1	0
RP1-228P16.4_ENSG00000257985.1	1	2	6	0	4	0	6	3	1	2	3	1	2	0	8	8	3	4	1	0	0	5	3	17	1	0	0	3	1	0	3	0	2	0	3	1	1	2	0	4	3	0	2	3	1	1	0	3	2
PLA2G12A_ENSG00000123739.5	474	502	143	255	324	529	411	533	295	131	608	364	227	431	139	234	238	10	234	177	61	114	290	151	91	124	196	138	399	302	601	332	397	609	219	210	508	395	331	174	244	271	255	208	427	306	730	319	385
RP11-153M7.1_ENSG00000248208.1	22	46	23	17	13	17	22	27	146	28	38	21	22	31	10	17	14	1	10	25	9	4	31	13	10	11	22	12	34	40	33	7	23	51	56	12	33	43	33	35	34	30	32	11	33	31	40	20	34
BSND_ENSG00000162399.6	14	2	1	1	4	1	6	0	5	0	28	3	6	1	3	0	5	4	2	5	5	0	5	5	0	0	1	0	4	0	5	0	3	5	2	4	3	4	0	2	2	2	0	1	6	7	1	8	4
RP11-334A14.5_ENSG00000232993.1	135	299	123	433	205	125	143	16	55	169	381	172	115	6	104	146	183	16	37	193	82	24	370	8	28	13	29	3	75	158	541	393	331	238	76	50	125	120	268	100	108	198	261	127	72	122	838	341	275
MTUS2-AS1_ENSG00000179141.3	22	1	8	0	3	15	0	0	6	2	9	1	4	0	1	14	16	1	3	0	0	0	7	0	2	1	6	0	29	5	9	0	20	10	6	3	0	1	0	24	16	7	16	0	0	3	13	18	10
RP11-763B22.4_ENSG00000237343.1	23	18	36	40	42	38	14	15	45	18	23	73	39	10	14	48	16	8	136	66	42	24	16	14	25	17	31	5	18	46	13	96	29	16	57	46	32	53	31	84	111	82	28	19	15	86	16	24	27
RP11-775J23.2_ENSG00000243508.1	11	10	6	5	22	20	14	16	39	12	10	14	34	13	12	14	3	3	3	9	8	15	22	11	4	8	13	4	7	7	19	18	14	19	9	6	15	30	16	6	5	8	4	6	4	13	14	10	16
RP11-545L5.1_ENSG00000248567.1	4	0	4	6	2	0	0	0	2	0	4	0	0	0	0	6	0	1	0	0	0	0	0	0	2	0	0	0	0	2	1	6	2	1	0	0	5	0	0	0	1	3	0	0	0	2	0	0	1
TRNAP27P_ENSG00000243253.1	0	4	4	0	1	9	0	2	0	4	0	0	11	0	0	10	5	0	1	4	5	0	4	0	2	2	0	2	9	3	2	6	6	1	0	0	3	0	1	0	1	7	1	0	2	0	1	4	12
MAP7D1_ENSG00000116871.10	12163	26183	4382	18389	7224	25977	12407	11950	13706	7947	19788	7666	12998	16827	6161	17380	4710	691	3971	21286	5443	1958	19707	7620	4779	5050	5536	2646	15597	11055	28268	10416	19649	23353	26647	4804	9387	18825	19771	9119	7213	11045	15018	6766	16833	12840	44311	15229	18830
TMED10_ENSG00000170348.4	7657	13576	2091	3334	4485	9343	9937	8783	4048	2975	8009	3535	3856	7756	1234	2675	1066	254	1156	5044	486	794	8228	1128	466	3148	2815	1004	10084	2516	15273	3575	7877	11839	5334	1032	10399	11341	5043	2641	1511	1694	2353	1082	10502	7448	6361	5058	7522
CEP55_ENSG00000138180.10	505	1805	222	306	312	758	1089	1343	457	518	253	158	414	1379	183	326	91	152	295	889	416	321	432	689	81	2760	125	353	1617	246	999	815	1426	712	131	246	1400	1052	509	241	175	226	313	82	1609	1576	169	1163	676
RP11-236B18.3_ENSG00000225525.1	0	1	0	0	4	1	2	0	0	0	0	1	0	1	0	0	0	0	0	0	2	0	0	0	0	0	0	0	0	0	0	0	0	1	0	0	0	0	0	0	0	0	0	1	0	2	0	0	0
U7_ENSG00000252885.1	0	0	1	0	0	0	0	0	0	0	0	0	0	0	0	0	0	1	0	0	0	0	0	1	0	0	0	0	0	0	0	0	0	0	0	0	0	0	0	0	0	0	0	0	0	1	0	1	0
SNORA18_ENSG00000252249.1	0	0	0	0	0	0	0	0	0	0	0	0	0	0	0	0	0	0	0	0	0	0	0	0	0	0	0	0	0	0	0	0	0	0	0	0	0	0	0	0	0	0	0	0	0	0	0	0	0
RP11-798K23.2_ENSG00000248177.1	3	0	1	2	1	0	4	4	0	0	1	0	0	0	0	0	0	2	1	0	1	0	1	0	3	5	0	0	0	1	0	0	3	0	0	1	1	0	1	4	16	0	0	0	0	1	1	0	0
RP11-345K20.2_ENSG00000229659.1	27	10	32	12	40	13	27	38	17	16	20	25	25	25	15	7	14	9	11	17	16	31	16	7	6	30	58	9	20	29	20	26	22	13	14	14	9	25	22	28	28	27	16	13	16	18	8	36	18
RSF1-IT2_ENSG00000254985.1	289	164	222	197	267	317	210	223	270	374	166	234	271	268	280	193	95	186	176	422	187	143	167	66	89	136	229	196	310	131	220	254	208	125	215	99	240	335	214	81	86	101	215	117	185	241	100	298	192
MIR539_ENSG00000202560.2	0	0	0	0	0	0	0	0	0	0	0	0	0	0	0	0	0	0	1	0	0	0	0	0	0	0	0	0	0	0	0	0	0	0	0	0	0	0	0	0	0	0	0	1	0	0	0	0	0
RP11-613M10.8_ENSG00000256966.1	872	1198	372	561	519	663	1247	1178	623	500	1111	459	536	708	230	587	337	36	267	439	267	182	1009	587	296	499	430	216	1330	604	1272	873	703	967	696	308	533	797	561	651	625	528	584	395	904	1264	1662	1103	667
AC093850.2_ENSG00000230838.1	62	87	10	86	10	111	130	0	79	33	28	42	19	4	3	14	12	2	23	2	8	0	30	19	8	2	4	0	15	58	595	175	55	44	144	21	24	70	32	28	37	45	57	150	30	59	72	43	42
AC007041.2_ENSG00000235411.1	41	73	15	24	44	59	64	103	34	47	62	25	25	59	46	23	14	4	21	34	18	60	42	56	19	67	18	32	88	30	71	46	60	93	61	29	44	38	68	45	38	60	41	19	118	53	76	47	56
BBS2_ENSG00000125124.5	1115	1771	582	906	459	2460	1789	1517	1633	466	1963	966	1099	1495	519	400	386	46	742	1146	574	501	1043	683	380	613	1603	411	1066	1049	2199	568	1299	1608	704	673	710	1738	836	1371	916	716	837	717	1359	1374	1718	957	934
RNU5E-4P_ENSG00000201801.1	0	0	0	0	1	0	0	1	0	0	0	0	0	0	0	0	0	0	0	0	2	1	0	2	0	0	0	0	0	0	0	0	0	0	1	0	0	0	0	0	0	0	0	0	0	1	0	0	0
C12orf50_ENSG00000165805.4	16	4	18	8	13	5	24	8	20	15	7	5	12	5	15	4	5	3	8	28	8	18	4	35	10	10	17	10	7	23	9	10	6	3	20	17	8	14	6	7	13	17	3	8	1	10	7	13	5
FAM90A15_ENSG00000230045.3	11	2	2	11	6	6	5	0	6	3	8	16	10	2	10	4	0	3	19	0	3	0	5	3	4	0	10	0	0	3	4	24	13	9	2	4	4	3	12	3	27	6	0	2	10	5	16	4	17
snoU13_ENSG00000238841.1	12	33	25	32	14	21	37	25	46	46	19	29	21	58	22	16	21	5	25	20	56	43	43	5	14	15	20	22	14	39	35	10	26	28	52	40	16	26	28	24	16	22	32	14	30	22	42	32	36
RP1-290I10.3_ENSG00000228478.1	0	0	0	0	0	0	0	0	0	0	0	0	1	0	0	0	0	1	0	0	0	1	0	2	0	0	0	0	4	0	0	0	1	1	0	1	0	0	1	0	0	0	0	0	0	0	0	0	0
RP11-35O7.1_ENSG00000248736.1	0	0	0	0	0	0	0	0	0	0	0	0	0	0	0	0	0	0	0	0	0	0	2	1	0	0	0	0	0	0	0	0	0	0	0	0	0	0	0	0	0	0	0	0	0	0	0	0	0
AC005094.2_ENSG00000229949.1	1	1	0	0	5	1	4	1	0	0	0	0	20	0	0	0	0	0	0	0	0	0	0	3	0	2	0	0	0	0	0	4	0	0	0	0	0	0	0	1	0	0	0	0	0	0	0	0	0
RP11-125C16.1_ENSG00000240873.1	14	22	4	11	11	3	20	14	20	3	10	16	8	15	2	9	4	0	8	2	4	2	6	15	6	3	6	6	17	6	12	8	21	17	7	11	13	18	11	12	6	12	8	10	9	11	14	9	14
snoU13_ENSG00000238636.1	1	0	0	0	0	0	0	0	1	0	0	0	0	0	0	0	1	0	0	0	0	1	0	3	0	0	0	0	0	0	0	0	0	0	0	0	0	0	0	0	1	1	0	0	0	0	0	0	0
LRRC3C_ENSG00000204913.4	0	4	1	0	2	0	6	1	5	2	12	0	0	0	3	0	0	0	0	0	0	0	3	0	0	0	9	0	0	0	0	3	1	4	5	0	0	5	0	10	4	0	0	2	0	2	2	0	14
ARHGEF25_ENSG00000240771.1	3001	2713	1359	7720	3389	3771	2245	174	2551	2272	8527	2756	1171	1392	1134	3358	1239	93	1022	7007	2014	3012	2931	620	874	265	13140	129	1068	4280	6078	5406	2820	2175	3839	2335	1232	1670	3235	11261	6935	9690	5469	4160	953	3241	21659	4448	2914
SART1_ENSG00000175467.9	6211	11078	4070	7167	6609	10703	9724	11341	7822	6621	6909	4790	10357	9898	4801	7875	3310	900	4073	16810	5386	3242	8806	4057	2500	10152	3595	5528	11037	4519	12906	6244	10481	10855	8600	3898	12684	14409	10685	4703	2591	5158	7165	2872	12805	7120	8345	7788	10650
RP11-37O16.3_ENSG00000255350.1	23	14	52	21	27	47	19	3	13	94	37	25	25	12	18	9	13	4	17	13	32	5	17	22	11	6	19	48	27	24	31	14	24	22	21	34	15	40	38	14	41	38	96	21	48	25	12	19	26
U6_ENSG00000206590.1	0	0	0	0	1	0	1	0	1	0	3	0	2	0	2	0	2	0	1	3	2	0	0	1	1	0	0	0	3	2	0	2	2	0	0	1	0	0	1	0	0	0	0	0	0	0	1	0	0
WDR18_ENSG00000065268.3	2715	6835	1436	3209	2819	3386	3118	5403	2649	1401	2939	2410	4165	5938	893	1741	1224	161	840	5770	1321	1346	3263	2691	1053	3487	1262	359	5885	1811	4958	3434	4849	4162	2327	749	2990	4248	3660	1589	2013	1617	3054	1129	8203	2818	2498	2782	4200
KIAA0319L_ENSG00000142687.11	6751	6524	4343	5393	9408	9442	7439	7797	7173	4843	8567	5783	7605	5841	4825	5942	4083	525	3231	10725	6886	2226	6577	1558	2334	4160	5332	2242	10913	6366	11229	4472	7316	15702	5169	4877	8012	5485	7140	5908	6494	5934	5518	2259	8919	9024	5505	6447	9663
HLA-DQB2_ENSG00000232629.4	717	438	208	631	715	2117	422	300	671	303	291	171	1503	106	65	306	64	40	316	594	52	17	179	100	297	72	221	17	256	198	2048	1908	1290	402	313	152	595	5761	730	829	86	187	492	245	85	656	213	714	299
C11orf83_ENSG00000204922.4	459	563	353	330	559	1004	590	1052	463	305	348	442	605	636	270	456	216	38	335	1065	375	336	726	212	177	505	294	89	1033	323	329	552	599	349	346	174	633	724	501	333	238	251	293	138	1008	512	300	476	524
RP11-335O13.7_ENSG00000234775.1	16	5	0	0	6	4	6	0	0	2	21	2	3	0	0	0	2	0	2	0	0	0	5	1	1	0	15	0	6	13	18	24	3	31	3	13	6	1	6	1	13	5	2	2	0	5	11	0	13
U6_ENSG00000206654.1	24	3	32	13	20	38	11	20	27	34	40	26	28	11	13	18	4	0	8	16	19	16	12	0	12	15	10	13	20	20	21	10	21	13	21	13	8	17	23	5	5	18	13	15	22	13	21	11	26
RP11-396J6.1_ENSG00000255130.1	9	0	16	12	92	0	1	0	13	125	32	2	81	0	227	0	0	2	62	0	1	167	190	7	5	13	3	29	14	61	21	1	26	0	22	0	0	4	16	47	2	5	0	2	0	0	5	0	97
PPP2R5A_ENSG00000066027.4	1886	3205	1189	1245	1576	1525	1790	3774	1515	1602	2963	998	2556	2621	647	981	632	306	703	1210	855	444	3410	3552	527	962	1190	1714	3946	1392	5792	3493	3177	3998	671	880	1659	2754	1943	1095	859	1199	1555	704	4593	2235	2615	1961	2456
Y_RNA_ENSG00000251852.1	2	0	3	0	1	0	2	0	1	6	0	0	1	0	1	0	0	4	0	5	7	1	2	1	1	0	0	0	2	0	1	8	1	2	0	1	14	0	6	1	1	7	3	0	0	0	0	0	6
VSTM2A_ENSG00000170419.6	30	0	11	1	7	3	19	0	0	2	50	36	0	0	2	18	58	4	0	3	4	2	6	18	0	0	0	0	42	2	68	0	54	19	1	15	2	15	0	74	6	2	9	9	0	14	10	336	25
U6_ENSG00000252101.1	1	2	5	2	8	8	8	3	3	1	5	8	4	2	11	0	2	0	30	5	7	5	5	2	1	1	7	0	3	4	3	4	0	30	3	3	0	5	7	4	2	7	2	4	0	1	3	2	0
AL162502.1_ENSG00000221465.1	19	11	9	4	5	3	14	16	12	7	15	5	24	7	5	5	4	0	6	7	10	6	13	21	6	8	4	11	11	16	10	7	7	17	2	3	27	14	9	11	2	5	9	11	9	16	9	15	11
SVIP_ENSG00000198168.4	2003	375	1252	937	1031	1430	1003	2001	634	1206	1560	491	1342	1037	712	311	504	242	201	807	461	478	1099	1306	195	573	819	1123	3756	561	2597	829	2053	1404	149	321	1690	909	1256	488	327	292	1288	375	1896	2012	943	1593	1702
RP11-11A18.1_ENSG00000230169.1	0	0	0	0	0	0	0	0	0	0	0	0	0	0	0	0	0	0	0	0	0	0	0	9	0	0	0	0	0	0	0	0	0	0	0	0	0	0	0	0	0	0	0	0	0	0	0	0	0
COL12A1_ENSG00000111799.15	3332	9595	911	23365	938	13340	14926	1724	523	6584	18856	4157	3693	11579	2012	1428	193	267	1287	1464	1215	817	6048	437	1764	1463	1623	168	1276	4893	61545	33111	5171	4664	11969	1085	4383	8519	5495	1900	2271	7984	5686	1255	3684	3313	36352	4394	5762
CTD-3110P2.2_ENSG00000256847.1	1	0	0	0	0	0	0	0	0	0	0	0	0	0	0	2	4	0	0	0	0	0	0	16	0	0	0	0	1	0	0	0	0	1	0	0	0	0	0	2	0	0	2	3	0	0	0	0	0
CTD-2313N18.2_ENSG00000255319.1	50	37	194	54	198	37	59	434	71	224	56	57	69	22	100	41	48	7	184	143	399	85	42	43	84	61	14	9	266	114	61	92	35	56	19	129	169	20	57	89	217	344	82	26	88	65	34	37	296
ETHE1_ENSG00000105755.2	1109	4487	616	1317	1028	2239	4241	4527	949	990	941	867	1404	4037	307	971	368	72	818	4408	991	454	4743	1080	461	2590	336	338	5145	899	4603	1067	2905	1400	1640	472	2943	1089	1612	515	626	623	1299	485	3890	2908	1304	1413	6670
RAB15_ENSG00000139998.9	3398	4346	1541	2399	2063	2262	2271	1129	1298	1612	2845	2731	1130	788	1212	2097	1069	131	1457	2007	981	1220	4626	1766	588	2124	1032	516	3074	2216	4075	1228	2300	2911	966	2894	2027	3288	2645	1924	2133	2764	2472	1012	4466	2276	3288	1759	5574
snoU13_ENSG00000238792.1	1	0	0	0	0	2	1	0	4	0	0	1	0	0	0	1	1	0	2	0	4	0	0	1	0	0	0	0	1	1	0	1	1	0	1	1	0	0	0	1	0	0	0	0	0	0	1	1	0
TCEANC2_ENSG00000116205.6	347	329	206	194	382	541	459	368	533	179	527	370	309	236	155	159	97	52	161	472	145	128	225	116	113	197	218	163	278	345	558	182	474	412	243	96	278	296	383	411	268	366	227	116	374	362	448	324	367
MIR1825_ENSG00000221667.1	100	120	48	83	73	135	90	90	135	44	76	76	95	191	43	46	20	3	29	100	29	29	92	18	12	68	53	8	117	70	149	121	93	184	106	43	144	195	78	66	93	77	66	22	115	213	125	75	120
IGHV1-67_ENSG00000253274.1	5	0	5	49	34	1	0	45	1	44	0	6	0	0	0	0	0	2	0	8	0	0	11	0	0	4	0	0	3	8	13	0	64	34	2	0	24	25	80	34	0	2	2	1	97	10	19	156	35
AC073343.11_ENSG00000226150.1	11	6	76	18	45	12	36	41	26	19	8	23	76	12	55	36	28	7	36	89	29	81	9	13	33	44	16	12	19	51	7	11	36	14	10	24	9	22	7	104	70	78	41	18	10	58	20	36	15
LRP5_ENSG00000162337.7	6423	30165	4909	8851	11319	12101	9762	24271	5676	5661	17678	4731	22700	8730	6199	14258	3449	1010	7028	17537	5306	6733	33509	2468	2009	11881	1479	6292	23377	8615	31364	12589	20738	30808	6067	6112	20278	26255	17920	5301	9641	12925	12255	1804	37314	17401	22123	10031	23774
HLA-DPA1_ENSG00000231389.2	19907	11402	6643	7175	28479	25785	9027	8966	41548	17706	21731	6701	34771	4756	4158	6056	5333	677	2001	12097	3787	660	5730	4349	5059	1457	12414	560	5850	6284	18543	9529	48028	15692	2775	2819	10599	12112	34890	24484	6740	3154	12446	12710	4369	23506	10386	25384	10946
RP11-420L9.2_ENSG00000219992.1	11	11	6	3	12	4	24	0	8	4	8	13	10	4	35	5	2	1	1	4	23	9	2	2	4	2	2	16	4	9	12	12	17	3	5	2	4	8	5	2	1	5	4	5	5	8	5	3	6
MIR1471_ENSG00000222246.1	0	0	0	0	0	0	0	0	0	0	0	0	0	0	0	0	0	0	0	0	0	0	0	0	0	0	0	0	0	0	0	0	0	0	0	0	0	0	0	0	0	0	0	0	0	0	0	0	0
IFIT5_ENSG00000152778.7	980	855	516	446	511	317	664	326	712	267	687	389	2031	1396	284	400	178	34	121	349	149	36	290	659	62	163	296	75	756	293	975	622	1344	770	387	188	745	1181	1880	358	137	281	325	204	491	1456	838	1336	946
RP11-738E22.1_ENSG00000250384.1	1905	1232	777	1509	1020	1778	1689	223	2588	1007	3246	1355	926	97	396	708	313	113	253	947	128	136	3251	73	167	166	1348	13	495	459	4621	1794	2192	1764	979	310	791	1124	1343	437	380	769	1655	520	640	1040	3587	1856	1922
IGLV1-50_ENSG00000211645.2	20	4	14	17	49	4	3	40	52	26	10	16	22	4	6	7	2	0	9	23	6	14	52	4	3	11	4	2	8	24	54	11	6	38	4	10	24	21	41	34	20	24	25	19	268	21	128	150	43
TRBV23OR9-2_ENSG00000229063.2	18	10	4	0	0	0	6	16	0	0	0	0	0	0	0	0	0	0	0	0	0	0	0	7	4	0	1	0	0	6	0	0	0	74	0	0	0	0	0	2	20	4	0	0	0	52	0	0	0
U4_ENSG00000200889.1	1	0	0	0	1	0	0	0	0	0	0	0	0	0	0	0	0	0	0	0	0	0	0	5	0	0	0	0	0	0	0	0	0	0	0	0	0	0	0	0	0	0	0	0	0	0	0	0	0
RP11-51B13.1_ENSG00000234625.1	0	0	0	0	0	0	0	0	0	0	0	0	0	0	0	0	0	0	0	0	0	0	0	2	0	0	0	0	0	0	0	0	0	0	0	0	0	0	0	0	0	0	0	0	0	0	0	0	0
RP11-603B24.2_ENSG00000259098.1	32	22	12	30	9	21	16	23	17	14	43	16	19	14	20	7	20	2	10	10	13	25	30	12	11	12	70	15	19	20	40	12	22	23	32	8	14	32	25	6	20	14	16	8	29	4	40	33	24
AC027119.1_ENSG00000229642.1	0	0	0	44	0	35	62	79	0	0	0	205	7	32	3	94	2	32	14	86	6	0	11	7	1	0	24	0	0	2	13	3	0	0	0	97	0	3	17	3	13	0	1	14	110	22	0	5	1
RP11-513G11.1_ENSG00000214145.2	106	163	106	149	46	73	288	46	96	81	320	190	227	82	150	58	178	17	225	159	121	118	199	27	379	19	13	140	63	374	38	174	137	237	75	958	92	185	283	442	139	56	117	86	32	193	64	25	183
SPOCK2_ENSG00000107742.7	4236	838	506	861	3419	469	1447	2685	2201	1402	816	953	1096	132	300	639	381	92	318	1098	441	866	211423	180	952	417	7832	2736	671	840	2153	931	6202	2336	405	343	1034	799	2840	7478	520	760	1311	1698	745	939	3506	4485	1302
ZMAT3_ENSG00000172667.6	2145	1947	704	1509	1568	1833	795	1289	1515	1035	4625	760	1527	2062	589	429	466	43	401	624	409	400	1972	885	471	553	8352	1093	1211	1105	6011	2283	2013	2284	1582	577	953	1209	1057	912	667	639	1081	1184	896	1215	2778	1726	1509
AC092580.3_ENSG00000230515.1	0	0	0	0	0	1	0	0	0	0	0	0	0	0	0	0	0	1	0	0	2	0	0	0	1	0	0	0	0	0	2	0	0	0	1	0	0	0	0	0	0	0	0	0	0	0	0	0	0
NAT1_ENSG00000171428.9	116	187	68	106	240	113	106	543	130	138	142	178	133	105	145	25	24	8	46	144	38	83	227	167	50	136	101	109	248	94	273	197	143	289	22	56	133	240	184	102	82	186	192	67	213	249	116	227	187
RP11-378J18.6_ENSG00000229399.1	13	19	18	6	19	12	22	44	28	35	34	22	19	20	11	10	7	1	9	8	30	26	104	9	27	18	1	69	29	29	34	45	29	36	10	22	25	25	18	26	4	40	20	3	31	20	32	16	24
ZNF484_ENSG00000127081.9	286	297	146	289	258	304	471	171	280	219	357	316	253	496	316	166	78	20	135	383	107	188	174	129	111	62	220	78	256	313	317	288	270	252	292	302	176	359	174	167	222	227	182	106	301	398	252	322	280
DARS_ENSG00000115866.6	3864	5304	1931	4204	3346	6096	5643	2653	3545	3628	4117	3389	3520	7510	1946	2212	1113	351	2336	3826	2370	1269	2773	3876	733	2115	3373	2039	5838	1863	5581	4585	5442	4842	6102	2276	5766	6429	3265	1815	1409	1473	2737	1307	5327	5278	4280	4135	5082
RN5-8S2_ENSG00000200434.1	4	1	4	3	4	2	5	7	4	4	2	1	2	2	3	0	1	0	5	3	0	1	1	9	1	2	0	0	0	1	3	8	2	2	8	1	3	0	6	1	3	0	1	2	4	1	1	1	2
7SK_ENSG00000252084.1	3	0	0	0	0	0	0	0	0	0	1	0	0	0	0	0	0	0	0	0	0	0	1	1	1	0	0	0	0	0	0	2	1	1	0	0	0	0	0	0	0	0	0	1	0	0	0	0	1
AL450311.2_ENSG00000240059.1	0	0	0	0	0	0	0	0	1	0	0	0	1	0	0	0	0	0	0	0	1	0	1	3	0	0	0	0	0	0	0	0	0	0	0	0	1	0	0	0	0	0	0	0	0	0	0	2	0
SNORA67_ENSG00000207027.1	1	0	0	0	0	0	0	0	0	1	0	0	0	0	0	0	0	0	0	0	0	0	0	0	0	0	0	0	0	0	0	0	0	0	0	0	0	0	1	0	0	0	0	0	0	0	0	0	0
VEZF1P1_ENSG00000236229.1	31	58	13	25	12	7	44	10	6	9	24	21	24	55	13	25	13	1	11	12	6	7	37	54	7	14	24	20	50	10	88	34	46	54	45	23	29	70	36	22	25	44	17	21	49	101	69	22	27
U4_ENSG00000222990.1	10	17	13	16	23	16	12	11	8	19	28	21	4	6	27	12	14	0	10	17	17	22	16	2	7	9	28	0	7	35	19	17	5	9	7	23	7	6	14	17	28	22	15	8	14	9	21	11	9
ZNF79_ENSG00000196152.6	273	260	122	184	242	387	321	429	250	135	368	168	356	292	392	109	100	25	48	250	208	317	298	63	164	132	225	250	172	163	323	132	245	277	261	176	163	327	214	225	265	213	235	108	178	340	274	284	170
EGFEM1P_ENSG00000206120.6	148	1	74	61	20	10	30	0	3	10	130	113	3	161	6	33	157	7	17	43	34	10	2	49	1	6	32	1	44	11	82	20	81	33	3	44	5	12	9	902	327	24	86	17	2	77	89	176	53
CTD-2089N3.3_ENSG00000248918.2	13	2	2	2	0	0	3	1	0	0	4	3	2	0	0	3	6	0	0	0	0	0	1	4	2	0	1	0	10	0	13	0	9	0	0	1	0	3	4	11	15	0	2	1	0	2	3	7	8
HILS1_ENSG00000188662.5	28	12	12	43	28	20	17	6	4	18	144	21	13	0	35	10	4	4	8	32	29	1	21	11	10	1	3	11	4	1	11	24	17	4	15	6	12	22	16	94	38	177	21	11	0	33	336	25	30
BX004987.7_ENSG00000235566.1	12	6	9	1	1	1	3	0	2	0	1	15	2	1	6	2	2	8	5	2	3	0	0	82	0	0	4	0	3	1	0	7	2	1	2	8	7	3	4	1	0	0	0	3	5	4	0	0	2
FAM25A_ENSG00000188100.6	13	14	1	28	0	0	8	0	6	24	0	0	3	16	4	1	4	0	18	25	6	0	1	6	0	0	0	4	12	0	9	1	1	0	70	5	14	1	2	2	1	2	8	6	5	4	9	13	12
RP4-594I10.2_ENSG00000231779.1	182	88	120	85	96	91	112	98	70	80	119	83	115	82	78	87	46	11	51	152	56	27	162	73	14	92	74	32	290	120	139	49	210	131	32	66	162	71	130	116	102	38	90	35	100	146	72	145	166
RP11-272J7.1_ENSG00000223746.1	0	0	0	0	0	0	0	0	0	0	0	0	0	0	0	0	0	2	0	0	0	0	0	1	0	0	0	0	0	0	0	0	0	2	0	0	0	0	0	0	0	0	0	0	0	0	0	0	0
NRG2_ENSG00000158458.14	174	36	103	46	319	142	49	14	99	81	187	227	132	16	14	237	215	13	123	233	5	13	292	10	63	5	40	5	117	35	134	34	194	255	34	118	23	58	82	336	171	102	134	204	17	85	394	247	119
5S_rRNA_ENSG00000251924.1	0	0	0	0	0	0	0	0	0	0	0	0	0	0	0	0	0	0	0	0	0	0	0	0	0	0	0	0	0	0	0	0	0	0	0	0	0	0	0	0	0	0	0	0	0	0	0	0	0
RP11-22N19.1_ENSG00000243438.1	3	0	0	1	0	1	0	0	2	0	0	2	0	0	1	0	0	1	0	0	0	0	0	0	0	0	2	0	0	4	0	0	0	3	2	0	0	0	2	2	0	0	0	0	0	0	2	0	0
PPM1F_ENSG00000100034.8	3561	5953	2179	3511	2878	4101	3384	1970	3643	2314	5276	3672	2869	3811	1919	2861	1556	68	1358	1586	1217	1597	4753	751	1166	1084	2386	193	2222	3870	5284	3409	4417	4066	3647	1910	1780	6284	4240	4368	2963	7551	3465	2301	2657	1586	8415	4749	4129
IGHV3-63_ENSG00000253936.1	24	0	4	114	54	0	0	82	4	30	0	6	0	0	0	0	0	0	5	6	0	0	18	6	0	4	0	0	4	8	24	0	20	82	4	0	54	24	48	28	0	10	0	0	133	16	22	284	26
AC006227.1_ENSG00000229457.1	7	0	0	0	1	0	0	0	0	0	0	0	0	0	0	0	6	4	0	0	1	0	0	14	1	0	0	0	6	0	0	0	0	0	0	0	0	0	0	1	0	0	0	0	0	0	0	1	0
U6_ENSG00000200648.1	6	2	2	1	1	15	1	0	40	6	4	4	2	0	2	1	0	2	0	4	1	1	3	1	0	0	1	0	3	1	2	7	2	3	11	1	0	5	4	5	7	2	0	3	1	4	2	5	3
RP11-5N11.6_ENSG00000250164.1	4	0	4	1	0	2	1	0	0	2	0	1	4	0	2	2	4	1	0	0	0	0	0	1	0	0	0	0	2	6	1	1	1	1	0	0	0	1	0	3	9	3	2	0	0	0	0	4	0
NAPB_ENSG00000125814.12	2756	948	661	900	795	1038	969	815	1785	589	1338	1333	734	1092	404	360	654	32	1074	817	680	274	553	148	229	389	700	108	1070	2157	890	674	1088	1130	491	1142	596	1286	916	1491	902	988	817	480	709	861	1337	1227	944
C10orf111_ENSG00000176236.4	22	34	38	13	31	22	47	31	19	9	30	20	19	14	23	6	8	1	55	33	9	27	20	8	16	36	31	5	27	27	14	16	34	14	17	15	19	29	14	29	21	24	14	20	8	14	14	26	33
CCDC110_ENSG00000168491.5	403	32	141	95	94	77	75	35	241	54	207	168	35	52	295	23	219	28	55	133	59	135	41	78	36	4	176	70	240	58	78	130	110	344	74	57	37	78	87	102	120	70	97	54	42	95	119	194	149
AP001610.9_ENSG00000232806.1	0	0	0	0	0	0	1	2	0	0	0	0	2	2	2	0	0	0	0	0	2	0	0	0	0	0	0	0	1	0	0	0	2	1	0	1	1	0	0	0	0	1	0	2	0	1	0	0	2
snoU13_ENSG00000238301.1	0	0	1	0	0	0	0	0	0	0	0	0	0	0	2	0	0	0	0	0	0	0	0	0	0	0	1	0	0	0	1	0	0	0	0	0	0	0	0	0	0	0	0	0	0	1	0	0	0
OR4K17_ENSG00000176230.4	0	0	0	0	0	2	0	0	0	0	0	0	0	0	0	0	0	0	0	0	0	0	0	0	0	0	0	0	0	0	0	0	0	0	0	0	0	0	0	0	0	0	0	0	0	0	0	2	0
OR8F1P_ENSG00000239426.3	0	0	0	0	0	0	0	0	0	0	0	0	0	0	0	0	0	0	0	0	0	0	0	0	0	0	0	0	0	0	0	0	0	0	0	0	0	0	0	0	0	0	0	0	0	0	0	0	0
RBBP6_ENSG00000122257.13	6698	6493	6343	6276	7975	10515	8995	6534	6005	5736	5686	6848	6681	5671	14093	4661	3447	2570	4559	10504	8804	6082	4801	1143	4637	5570	7148	5802	6979	5329	5270	5833	7394	4917	5988	5520	5055	6043	6569	6919	7556	8366	6601	5121	5060	5946	4726	7534	4528
KCTD9_ENSG00000104756.11	1086	1353	439	962	942	1357	578	854	1065	975	1186	877	885	2463	434	417	240	118	387	673	197	332	1735	947	164	369	756	444	1185	807	1702	1676	817	1900	660	433	1180	1679	1185	468	461	781	736	569	1176	1893	1398	1051	818
AC021860.1_ENSG00000196355.2	145	158	145	260	179	87	213	103	150	156	194	524	109	151	140	107	151	8	253	185	125	100	150	68	39	80	43	52	160	236	147	207	103	179	400	433	159	319	186	195	371	236	169	153	249	108	120	110	174
TMEM86A_ENSG00000151117.3	1425	2539	598	483	554	610	866	963	976	418	883	270	1627	979	108	265	255	36	69	1402	116	108	2013	219	64	70	827	29	1512	367	1636	516	1352	1430	151	278	745	911	1112	308	401	185	535	179	1228	1367	657	709	1440
RBM47_ENSG00000163694.10	4189	8695	2282	2212	3177	4342	3688	11778	2488	2464	4609	2283	4281	3422	1863	2327	948	477	672	4185	1476	2039	3647	6605	849	1461	552	4302	6886	2696	8985	2671	3133	8794	575	2059	4543	4680	3076	1552	1685	1081	3107	639	8571	8146	1394	3824	4325
CUZD1_ENSG00000138161.8	6809	573	424	295	171	251	495	169	404	836	1054	233	644	1615	64	407	7773	72	338	608	293	95	188	190	187	297	133	141	420	408	198	138	403	26781	284	418	249	602	311	412	1423	490	290	325	260	196	351	165	874
NEDD9_ENSG00000111859.12	3418	2805	785	2126	2897	1770	4099	1297	1201	1838	2863	1844	2010	3697	1847	2601	650	365	562	793	1548	1634	4262	1090	1412	1160	1000	3716	2354	3497	6850	1971	4210	4610	2205	1346	3280	2281	2481	1912	2146	1609	3611	1095	1755	1838	4424	2847	3671
RAB8B_ENSG00000166128.7	1294	998	572	1001	782	494	1026	352	1109	1175	1043	465	1152	897	206	428	123	51	130	265	163	126	453	1149	166	95	307	175	959	479	1560	556	1593	1131	634	289	1480	615	747	803	195	277	497	498	1191	839	945	878	1137
RP11-154P18.3_ENSG00000233976.1	14	6	2	23	6	31	10	10	4	12	11	8	14	8	22	12	5	0	15	27	13	11	7	7	7	0	15	8	23	10	7	4	4	12	8	12	4	0	4	8	23	7	0	5	16	8	6	22	5
SLC2A9_ENSG00000109667.7	219	193	98	132	91	1919	361	157	283	148	221	299	254	179	37	131	41	13	307	90	85	25	99	60	52	43	56	9	187	133	455	150	171	225	1420	117	49	1195	181	154	138	72	89	87	125	240	195	202	112
RP11-400N13.2_ENSG00000228437.1	18	24	18	27	13	24	106	235	5	72	17	1782	24	269	15	15	4	3	1155	15	662	12	10	15	854	25	12	7	15	28	42	45	21	10	41	21	8	37	21	11	9	132	16	3	108	13	17	170	194
TRNAQ51P_ENSG00000244591.1	0	7	3	19	6	4	10	6	6	4	7	12	15	5	7	6	3	0	16	16	0	2	11	3	4	0	9	0	1	10	5	22	4	17	16	7	2	3	10	30	35	29	4	5	4	20	4	4	16
RP11-313C15.1_ENSG00000253726.1	13	0	4	0	3	0	2	0	1	0	14	5	0	0	0	0	1	1	0	0	11	0	4	18	0	1	0	2	3	1	3	1	4	6	0	0	0	0	2	8	3	0	4	0	0	1	5	13	4
AL139800.1_ENSG00000239400.1	18	37	10	58	11	59	51	1	11	25	23	28	16	74	0	32	7	2	4	19	4	0	49	1	1	1	0	2	10	5	161	33	35	12	57	15	11	11	16	10	14	8	54	9	5	39	38	20	43
KCNQ2_ENSG00000075043.12	841	0	138	32	4	44	22	52	2	0	282	68	2	6	0	64	629	45	12	108	40	144	63	26	0	2	70	9	741	24	99	0	207	174	0	74	4	28	29	412	396	16	279	39	44	109	232	445	168
ZMYM4_ENSG00000146463.7	2611	2164	1753	2528	1629	2804	2442	1762	2906	1675	3720	2448	1846	1920	1439	1760	923	247	895	1769	1173	695	1529	1697	897	877	2032	1653	2609	2671	4984	1601	2749	3988	1971	2296	1286	1648	2375	2414	2220	2626	1900	1411	2503	2840	3639	2325	2259
MEGF9_ENSG00000106780.7	1669	1240	349	417	481	1010	986	1158	864	697	1362	358	728	4288	223	223	296	64	123	416	152	59	1001	312	98	302	1166	122	1219	365	2040	710	1121	1442	337	246	754	3240	527	404	336	274	584	385	588	821	1344	1009	1120
NCRNA00276_ENSG00000230448.1	13	3	11	7	1	26	7	6	16	2	6	6	6	0	13	11	6	1	22	2	12	28	2	41	6	13	23	7	1	8	9	5	2	3	9	10	2	8	5	6	1	18	9	4	1	4	0	17	2
AC109357.1_ENSG00000216154.1	5	8	1	2	4	4	2	5	8	0	6	3	3	9	3	1	1	0	1	5	2	3	4	9	3	2	2	2	1	9	7	4	5	3	8	9	6	5	6	5	1	2	5	6	12	2	6	14	7
AC009970.1_ENSG00000233953.1	16	10	7	3	37	35	14	0	2	2	10	13	14	7	10	3	2	0	9	1	0	0	1	3	4	37	29	0	0	12	16	46	18	20	16	11	0	11	6	31	10	22	3	3	0	8	48	10	6
VPS72_ENSG00000163159.6	1835	2836	898	1265	1255	1987	1772	2191	1416	1052	1392	1104	2179	3096	1081	1483	474	222	616	2590	902	616	3269	1385	704	1321	1327	1000	2401	1186	3236	2649	2581	2073	1164	697	2559	2745	1691	1341	948	1976	1218	732	2002	2674	1761	1415	2024
AC012123.1_ENSG00000228835.1	3	0	1	0	11	6	3	0	3	4	0	0	0	0	0	0	0	5	0	0	1	2	15	4	10	1	0	0	3	0	1	0	9	4	0	0	2	0	2	19	3	0	5	14	0	0	2	6	7
OVOL1_ENSG00000172818.5	298	1237	106	580	232	407	361	1070	6	560	99	118	537	652	174	841	127	58	124	2226	400	105	343	590	48	904	17	94	1136	203	956	81	374	662	131	491	649	406	407	170	217	356	405	40	1570	2348	52	287	1429
U6_ENSG00000252506.1	0	0	0	0	0	0	0	0	0	0	0	0	0	0	0	0	0	0	0	0	0	0	0	2	0	0	0	0	0	0	0	0	1	0	1	0	0	0	0	0	0	0	0	0	0	0	0	0	0
ZNF367_ENSG00000165244.6	82	340	41	63	74	251	683	329	203	61	142	32	144	265	40	90	8	9	61	68	31	37	64	248	32	118	57	83	293	103	324	181	229	168	63	111	173	246	52	73	30	83	112	31	337	517	132	240	116
RBAK_ENSG00000146587.12	1596	1075	1605	941	1538	1917	2111	1955	1750	1512	1695	1523	2118	1764	1443	904	526	135	1297	1120	1053	1205	1059	846	651	1228	1240	1067	1444	1116	1874	1561	1818	1566	1207	746	1593	1825	1249	1097	806	1319	852	474	1619	1266	1191	1439	1537
MIR143_ENSG00000208035.1	9	0	9	7	18	4	4	2	8	7	24	3	2	0	0	8	3	1	2	6	23	4	2	1	11	1	0	6	0	16	0	6	7	5	4	3	1	3	2	15	20	37	3	17	2	2	18	10	3
C6orf145_ENSG00000168994.8	1662	2811	598	1319	1267	1656	2807	1033	1526	1374	2197	1058	2082	2828	1202	1057	375	105	235	1210	998	237	2281	709	483	240	538	446	1052	1480	3114	1615	2475	2823	1267	531	4694	2094	1800	760	1096	939	1363	558	1031	1056	3056	1526	2380
BCL6_ENSG00000113916.13	3899	4848	3116	7251	3137	3299	3066	888	4415	4597	5402	4874	3241	3776	1380	4628	2561	322	3049	3817	1156	1836	2447	2799	1667	285	3850	1987	3637	7313	5109	2209	2485	7644	4572	12016	2199	4181	5573	5578	8412	6265	3959	4921	2435	6191	10685	3786	5509
RP11-571F15.2_ENSG00000227383.1	24	30	19	38	24	21	33	38	56	35	40	21	18	38	17	25	8	2	19	21	21	16	67	31	12	16	23	14	28	45	50	43	17	28	37	28	28	30	22	17	27	18	22	12	33	49	28	25	21
TBC1D3F_ENSG00000185128.10	5143	13646	10385	18545	6251	8616	25034	7691	9396	8862	10249	16786	9361	7228	3642	13442	4063	762	16393	22243	7651	13649	9775	618	6983	4823	3576	4054	6437	19279	5490	11746	6778	3559	14013	33013	14139	14434	19537	11325	35119	18915	15988	6222	18260	9935	7361	7174	33500
snoU13_ENSG00000238313.1	0	0	0	1	0	2	0	0	2	1	1	7	1	0	2	0	0	0	0	0	0	0	0	0	0	0	1	0	2	0	1	1	0	0	6	0	0	0	2	1	0	0	0	0	0	1	1	1	2
CDC37_ENSG00000105401.1	12867	21689	15622	27148	15551	13342	23527	23378	14266	20418	13427	16581	18350	17702	19577	14763	11874	2734	15215	34315	21769	16639	14452	5532	11776	11739	7818	10360	27020	16788	19624	14042	21327	15693	17641	22160	12912	17343	19225	17056	11656	16773	24580	12513	22980	18456	11936	22780	19608
MAGI2_ENSG00000187391.12	867	334	567	703	274	408	321	123	260	214	874	531	314	437	215	180	349	112	116	397	204	45	189	147	85	47	389	20	601	298	991	345	585	464	156	247	600	220	374	469	502	346	476	324	80	497	1134	633	528
hsa-mir-1979_ENSG00000238346.1	399	29	153	69	30	51	56	5	4	25	729	71	18	41	42	28	233	4	5	9	3	1	68	11	1	0	75	0	344	25	346	59	306	263	26	26	12	50	49	158	39	20	214	10	7	108	249	557	133
MX1_ENSG00000157601.9	4238	9898	4063	1994	5032	4224	14897	1175	5526	2212	3390	2426	44901	17984	4188	7910	2571	432	3969	29308	15273	278	1286	7251	1159	264	2886	853	8145	5635	3851	1784	19534	2379	7768	6027	9543	3482	39886	3378	1805	2244	2316	1659	4572	29995	4664	11861	26637
SUSD4_ENSG00000143502.8	2135	132	1079	429	995	1567	340	0	149	82	1271	852	786	623	46	460	962	27	1315	292	366	23	476	68	708	7	846	44	1623	398	2678	2567	1120	950	202	472	64	573	337	1561	1594	466	850	126	24	616	549	657	570
RP11-809H16.1_ENSG00000137808.10	42	51	98	12	18	163	61	4	4	11	29	11	27	52	29	23	1	1	8	24	3	78	93	30	6	5	16	2	27	34	31	3	25	17	229	17	1	31	7	34	191	25	18	17	31	64	60	31	24
AP000797.3_ENSG00000256717.1	0	0	0	0	2	0	0	1	0	1	0	3	0	0	0	0	0	0	0	0	2	0	2	5	0	0	0	0	0	0	0	0	0	0	0	0	1	0	0	1	0	0	0	0	1	0	0	0	0
RPS2P5_ENSG00000240342.2	11553	19684	5610	10154	12081	20516	23402	30176	15440	5413	11853	6248	10123	24396	2976	11698	3271	1866	3574	12077	2681	4683	10891	7258	1587	11528	2974	2391	23380	4387	26221	12360	19156	16041	10368	2025	12686	31595	6979	4834	4164	4927	7055	4918	25296	13002	11019	12440	12944
RP11-778D9.4_ENSG00000228205.1	473	1023	263	487	574	545	435	748	568	307	380	322	460	765	189	333	112	49	115	728	89	214	633	353	119	790	240	105	1139	236	848	571	857	645	586	93	1006	1904	392	339	287	224	373	160	998	891	513	551	772
snoU13_ENSG00000239062.1	18	47	23	35	16	25	10	41	7	22	37	13	36	34	2	56	12	1	1	15	5	11	51	14	22	6	2	23	20	12	35	13	43	38	8	14	16	84	45	34	24	21	45	3	86	10	17	28	26
CCDC42B_ENSG00000186710.7	672	1600	691	1973	722	919	797	1217	624	346	733	919	644	764	1520	1634	292	120	710	8497	602	243	965	224	401	1102	452	395	4224	574	1460	1361	1332	970	775	331	754	1815	1396	287	528	1584	735	479	1241	1579	549	981	922
RP11-100G15.5_ENSG00000240791.1	22	38	7	7	10	27	23	16	16	20	22	15	27	45	8	4	2	2	3	4	7	6	15	7	8	3	5	5	18	3	38	9	18	15	6	14	19	38	11	6	5	15	12	5	23	23	11	14	17
AC025750.6_ENSG00000232526.1	5	1	6	0	0	0	3	1	0	4	1	2	2	0	0	0	3	0	2	2	6	3	2	1	0	0	1	0	7	1	1	0	2	4	1	0	0	3	4	14	0	1	4	0	0	8	3	1	5
KIAA0195_ENSG00000177728.9	6524	17026	4449	9161	5204	5540	9377	9612	7180	4405	7230	6724	7550	8192	3969	3227	4731	477	6176	8920	6785	4656	9650	1288	3531	5471	5358	1112	7524	7659	12055	6930	6979	13298	8421	12964	9999	13398	13388	11925	13634	14853	12521	5337	23834	11053	13565	9564	14572
METTL21D_ENSG00000100483.7	429	346	296	359	452	708	993	700	533	439	452	868	453	352	233	372	174	20	493	401	219	150	403	165	210	260	278	106	388	632	466	282	485	376	530	455	532	734	433	1318	441	393	318	228	644	290	382	529	403
MIR2110_ENSG00000238742.1	35	30	42	24	35	15	31	43	36	22	37	25	62	35	57	17	24	2	26	43	25	20	19	9	6	34	36	36	36	23	25	20	30	16	15	18	42	26	25	16	15	12	33	9	11	21	12	22	29
AL591044.2_ENSG00000240982.1	0	0	2	2	0	0	0	0	0	0	0	0	0	0	3	0	0	1	1	0	4	0	0	2	0	0	4	0	2	0	0	0	0	0	0	0	0	0	0	0	0	4	7	0	0	0	0	0	0
AC002464.1_ENSG00000241162.1	2	0	0	0	0	0	1	0	2	0	0	0	1	0	1	0	0	0	0	0	0	0	0	0	0	0	0	0	0	0	0	0	1	0	0	0	0	0	1	2	0	0	0	0	0	0	0	0	0
SLC1A1_ENSG00000106688.7	1229	874	1053	557	1284	131	879	3273	591	359	2930	643	1108	50	330	180	232	48	169	278	405	104	3949	158	312	744	279	49	824	2143	1712	1948	1008	4598	26	735	1194	382	1593	260	1361	556	911	158	2933	1362	1201	560	1989
RP11-403N16.2_ENSG00000232494.1	0	0	0	0	0	1	1	0	0	0	0	1	0	0	0	0	1	0	0	0	0	0	0	4	2	0	0	0	0	0	0	3	0	0	1	0	0	0	14	0	1	1	0	0	0	0	0	0	0
SLC9A7P1_ENSG00000227825.3	96	21	21	20	64	91	70	20	139	26	118	93	65	45	33	4	47	3	35	23	23	4	78	4	0	0	53	6	53	17	138	102	65	131	12	21	44	13	27	47	60	50	29	10	11	39	144	61	50
RP11-159K7.2_ENSG00000250358.1	2	0	0	0	0	0	0	0	0	0	0	0	0	0	0	0	0	0	0	0	0	0	0	5	0	2	0	0	3	0	0	0	0	0	0	5	0	0	0	2	0	0	0	2	0	0	0	0	0
AC090519.7_ENSG00000203576.1	0	0	2	0	0	1	2	0	1	3	4	2	1	0	0	1	0	1	0	1	2	0	2	2	0	0	2	0	1	0	2	2	5	0	0	2	0	3	0	0	1	0	2	0	1	0	0	2	0
GAPDHP53_ENSG00000234069.1	0	0	0	0	0	0	0	0	0	0	0	0	0	0	0	0	0	0	1	0	2	0	0	0	0	0	0	0	0	0	0	0	0	0	0	0	0	0	0	0	0	0	0	0	0	0	0	0	0
PMM2_ENSG00000140650.6	1855	2680	1684	1977	2311	4469	4742	5985	2419	1646	2276	1884	2478	3248	2720	1599	1275	259	1469	2840	3911	1762	3155	977	767	1809	713	3023	4519	1722	3238	2750	2763	3358	2218	1345	3417	3077	1626	3234	1748	1911	2020	726	3658	2705	1619	2095	1841
Y_RNA_ENSG00000200428.1	12	36	10	13	20	9	22	26	10	15	14	18	26	20	4	8	9	2	12	6	3	2	24	19	7	10	7	6	19	17	22	14	15	20	16	25	24	19	24	18	4	9	8	8	12	16	13	21	18
RP11-173P15.7_ENSG00000255946.1	3	5	4	4	10	1	7	10	2	4	7	6	12	2	4	1	0	1	8	8	5	8	15	0	1	21	6	3	2	6	3	2	2	7	4	5	1	14	10	5	2	16	6	5	2	5	6	5	3
RPL6_ENSG00000089009.9	20011	17394	7272	8655	16547	15243	14761	28248	23131	8649	12815	11043	7918	13773	4072	9967	4607	1206	5549	11430	3682	2405	12427	7904	3810	19670	7377	3135	17276	6564	18756	16237	17139	17062	9901	2883	8003	25698	7901	6595	4768	5615	6962	6187	18333	5508	10238	19248	10607
RP11-707M1.7_ENSG00000254487.1	0	0	0	0	0	0	2	1	0	0	0	1	0	0	2	2	2	0	0	0	2	0	0	7	0	0	0	0	1	0	0	0	0	1	1	2	2	1	6	0	0	7	0	0	0	1	1	0	0
PDE11A_ENSG00000128655.10	139	288	197	204	336	95	187	166	196	168	516	129	422	161	219	164	117	14	29	138	78	96	232	187	111	58	101	109	394	202	618	328	341	426	14	187	647	13	147	145	498	400	123	26	321	380	105	336	280
7SK_ENSG00000201564.1	20	12	5	8	19	16	23	5	15	13	21	10	23	22	11	12	4	3	3	4	10	1	25	17	14	2	6	4	14	12	34	10	23	12	4	5	23	12	20	14	3	10	7	5	15	8	31	15	21
RP11-463J7.2_ENSG00000231175.1	2	0	1	0	0	2	2	2	0	0	0	0	0	0	1	0	0	1	2	0	2	0	1	19	0	0	0	0	0	0	0	0	0	0	0	0	0	0	0	0	0	1	1	0	0	0	0	0	0
RP3-473L9.4_ENSG00000257595.1	4	3	7	5	6	2	1	0	24	0	17	15	1	2	4	3	5	0	11	6	4	6	1	2	3	0	1	4	32	3	1	0	6	2	7	9	8	3	7	3	5	4	3	0	4	4	1	3	10
AC131055.10_ENSG00000241366.1	0	0	0	0	0	0	0	0	0	0	0	0	0	0	0	0	0	0	0	0	0	0	0	0	0	0	0	0	0	0	0	0	0	0	0	0	0	0	0	0	0	0	0	0	0	0	0	0	0
OSTC_ENSG00000198856.8	1326	2234	378	739	732	2469	1672	1676	1463	580	1233	986	839	1317	338	390	214	61	389	836	180	175	1439	648	179	451	607	355	2032	600	2878	1836	1196	1286	942	257	2238	1556	723	567	342	276	515	266	2044	2157	1191	1216	1297
AC005594.1_ENSG00000205790.1	940	2067	929	1184	1170	1092	2549	1654	1426	920	1258	1559	1802	3204	804	963	549	44	593	1041	944	702	1557	518	887	1021	482	246	1078	1499	1403	982	1315	1482	2107	1793	896	2754	2184	974	1303	1945	1606	737	2665	1300	1071	1343	1318
GDPD4_ENSG00000178795.5	25	6	18	5	17	5	7	28	19	8	9	15	40	0	40	10	4	7	17	23	25	108	22	24	9	3	0	7	3	26	21	14	4	15	14	24	12	22	29	20	23	26	10	21	15	30	0	14	19
RP11-761N21.2_ENSG00000234287.1	937	1077	427	629	1117	854	875	853	897	634	631	602	661	1406	322	741	275	149	321	936	246	297	1210	827	141	498	346	379	1860	366	1637	1115	1525	809	695	113	1290	2041	421	375	356	168	421	370	1176	766	792	1299	1296
SETD5_ENSG00000168137.11	12359	14571	10118	18116	14251	10052	12812	13919	12362	14338	10700	16848	8088	10157	6506	13060	6156	2519	11950	17340	13231	7289	11556	3563	7128	5744	8464	12015	13733	14484	15088	12622	9918	14568	9442	15476	9422	10284	12234	14129	13164	12756	11680	6235	11615	15182	13584	12840	12879
RHOA_ENSG00000067560.6	14710	26899	4328	9348	5688	11930	11040	13106	10846	8236	10598	5475	8142	21622	2269	7721	1830	1637	1926	8748	1763	1179	18341	19692	2222	2996	6539	4303	20258	4659	27312	9106	15907	23795	8423	1906	9037	11218	7494	5589	2975	2947	7542	5000	15692	12639	13975	13634	10796
RAPGEF2_ENSG00000109756.4	1485	1899	871	955	1324	1665	1358	1458	1774	1163	2085	1565	1319	1176	511	820	486	157	648	1391	599	775	1691	1094	403	497	635	798	1630	1121	2151	1265	1357	2451	1132	1421	1783	1314	1286	808	789	1061	1255	845	1457	1456	2321	1387	1541
AL133244.1_ENSG00000223951.1	4	39	6	1	1	13	31	13	1	9	30	6	20	40	6	6	0	0	0	0	0	6	12	7	6	9	24	3	6	10	21	3	0	75	18	12	0	9	3	6	3	19	3	3	3	3	132	3	7
snoU13_ENSG00000238311.1	25	4	20	14	7	19	16	9	26	32	22	15	22	9	3	8	8	3	9	5	10	7	8	2	1	5	8	8	16	20	14	4	14	22	5	11	19	14	9	16	8	11	5	7	17	9	11	10	10
C12orf70_ENSG00000165935.5	55	72	60	117	33	52	88	16	43	43	37	84	63	70	30	90	26	13	30	73	57	89	38	55	18	15	7	10	36	116	77	87	49	28	301	151	27	61	52	20	55	46	61	67	78	89	29	144	52
RP5-1046G13.2_ENSG00000218732.1	0	1	1	0	1	1	1	1	1	0	1	0	0	0	0	1	0	0	0	4	0	0	1	13	0	1	0	0	0	1	2	0	0	1	2	0	0	2	1	0	0	1	2	1	0	2	0	0	0
ZP1_ENSG00000149506.5	32	1	15	25	12	23	2	12	11	2	11	9	21	4	12	22	23	4	27	22	12	2	11	4	0	8	18	4	9	13	10	16	15	7	98	13	17	8	23	33	21	27	17	9	10	25	8	19	22
PPIAP10_ENSG00000224530.1	39	15	47	58	46	43	24	2	20	32	43	62	20	0	10	68	22	16	70	75	17	27	33	8	5	7	18	5	13	22	52	21	44	28	32	13	4	7	49	16	11	11	18	29	4	45	59	52	90
HIST2H3D_ENSG00000183598.3	2	11	12	4	1	5	11	9	8	2	12	17	17	8	20	35	5	0	30	9	37	10	12	13	3	11	0	2	7	6	3	21	11	7	9	10	7	18	9	2	1	5	4	3	5	28	14	10	8
GTDC1_ENSG00000121964.9	836	818	360	579	517	1261	709	838	775	497	613	620	512	1823	267	398	167	39	329	224	156	65	468	657	191	289	376	189	601	412	1314	374	955	1077	883	346	306	637	402	441	278	337	322	329	466	468	642	574	431
RP11-523O18.7_ENSG00000241577.1	12	0	1	5	38	2	11	3	34	11	4	2	20	4	3	9	2	0	3	9	4	0	6	8	24	0	30	0	4	11	9	8	45	5	3	0	10	7	12	139	10	3	5	18	2	5	3	20	10
RP11-310I9.1_ENSG00000248601.1	53	140	81	68	51	1	26	34	28	90	46	11	71	3	3	84	4	29	9	86	47	4	61	364	51	0	1	102	374	74	265	1	8	132	0	34	303	45	35	16	8	14	96	1	62	231	12	19	50
EXOC8_ENSG00000116903.6	641	954	440	319	555	685	526	674	679	432	1039	539	1090	1199	368	244	120	28	240	300	305	262	1148	621	182	280	315	508	718	318	1356	997	873	956	389	179	859	1407	526	314	377	631	367	176	793	590	691	598	657
GPR137C_ENSG00000180998.7	99	58	18	22	45	44	79	48	119	77	61	61	35	17	12	49	13	10	81	31	19	20	25	73	29	12	49	5	27	111	54	56	55	61	7	30	38	35	27	86	47	66	26	60	77	32	81	54	58
AE000661.36_ENSG00000256221.1	0	0	0	0	0	2	0	0	0	0	0	0	0	0	0	0	0	0	0	0	0	0	0	0	0	0	0	0	0	0	0	0	0	0	0	0	0	0	0	0	0	0	0	0	0	0	0	0	0
TECTA_ENSG00000109927.5	51	65	63	48	74	41	48	5	201	67	195	54	54	6	29	16	59	3	26	21	25	16	33	22	16	7	146	0	64	92	75	46	81	131	101	59	9	65	73	191	173	78	73	39	13	40	189	88	72
U3_ENSG00000221332.1	24	12	8	6	13	4	6	3	9	1	36	8	7	2	11	5	4	3	5	3	7	9	8	0	4	3	18	3	8	5	11	7	12	3	11	1	0	0	9	5	4	19	6	21	0	2	100	7	4
AL138479.3_ENSG00000231922.1	0	0	4	0	0	0	0	0	0	1	0	0	0	0	0	0	0	0	0	0	0	0	0	16	0	0	0	1	2	0	0	2	0	0	1	2	0	0	0	0	0	0	0	1	0	0	0	0	0
Y_RNA_ENSG00000252367.1	0	0	0	0	1	0	0	0	0	0	0	0	0	0	0	0	0	0	0	0	0	0	0	2	0	1	0	0	0	0	1	0	0	0	0	0	0	1	0	0	0	0	0	0	0	0	0	0	0
RPL23AP69_ENSG00000235315.1	7	6	3	3	7	1	7	8	4	1	6	6	4	10	1	4	1	0	1	4	2	1	2	2	3	3	2	5	26	1	12	12	11	5	3	1	8	13	4	2	3	1	4	2	14	10	5	7	5
RP11-116O11.2_ENSG00000249562.1	0	0	0	0	0	0	0	0	0	0	1	1	0	0	0	0	0	0	0	0	0	0	1	1	0	0	0	0	2	0	3	0	2	0	0	0	0	0	0	2	2	0	0	0	0	0	0	3	0
RP11-674C21.9_ENSG00000254804.1	1	2	1	1	1	3	3	1	2	2	0	3	4	3	1	2	0	0	13	5	1	1	1	8	0	3	0	0	0	3	0	0	2	0	2	2	0	0	1	3	2	0	4	0	0	2	0	2	0
RP11-383G10.1_ENSG00000236108.1	0	0	1	0	0	6	0	0	0	0	0	0	2	1	0	0	0	0	1	0	0	4	0	2	0	0	7	0	0	1	0	4	0	0	3	0	0	1	0	0	0	1	0	0	0	0	0	0	0
TIGD7_ENSG00000140993.4	347	210	224	290	335	608	820	172	379	206	423	335	490	166	211	209	126	16	239	233	219	81	257	85	87	57	370	21	226	301	332	335	334	373	231	151	376	494	281	185	361	503	180	143	151	207	342	263	195
REXO1L2P_ENSG00000223524.2	8	4	4	4	0	5	11	0	7	0	2	2	2	2	8	12	18	44	21	4	14	18	4	221	4	2	13	4	2	8	6	4	12	2	13	6	1	1	5	3	7	4	4	8	4	4	0	26	6
RP11-789C1.1_ENSG00000250266.1	8	0	0	1	51	0	0	80	0	0	2	1	43	0	0	10	1	2	5	40	6	0	0	11	1	0	0	0	20	3	5	1	6	21	3	10	2	0	1	9	3	0	9	1	140	32	2	9	16
RP11-218E20.6_ENSG00000258398.1	9	27	4	13	7	22	53	19	47	12	31	47	2	11	1	30	2	0	53	25	13	9	1	20	9	3	116	4	4	10	4	15	12	9	104	8	2	13	15	42	75	15	5	4	3	15	10	15	10
NRXN2_ENSG00000110076.13	2478	1449	501	1749	527	354	650	15	784	987	1402	655	518	58	33	1034	488	48	68	437	217	34	2438	72	197	39	1953	15	363	379	3464	331	2454	1885	512	750	288	621	2173	389	503	663	873	1489	205	812	3718	1327	2197
RP11-881M11.4_ENSG00000256196.1	155	239	28	61	39	183	79	136	42	27	143	51	103	182	19	94	28	7	11	48	5	21	384	20	11	19	30	1	66	77	349	85	182	154	80	28	43	189	129	59	14	49	44	18	176	40	209	116	144
AL136967.1_ENSG00000238867.1	0	0	0	0	0	0	0	0	0	0	0	0	1	0	1	0	0	0	0	0	0	0	0	1	0	0	0	0	0	0	0	0	0	0	0	0	0	0	0	1	0	0	2	0	0	0	0	0	0
RP1-309F20.2_ENSG00000234747.1	5062	3580	2257	1392	1382	2725	2707	2401	2172	980	4124	1523	2122	3270	311	1555	2610	219	459	1798	403	256	5447	2528	278	881	2099	603	5790	873	5095	1330	4437	5073	1327	839	4172	4501	2189	2569	869	1063	3308	814	2265	4155	3651	5391	3654
RP11-359J14.2_ENSG00000256973.1	79	33	40	25	81	56	40	60	57	38	59	31	45	35	24	6	12	2	18	4	34	1	23	36	5	33	21	4	41	34	49	30	38	97	6	30	25	23	30	28	35	40	14	6	55	43	62	34	74
DEPTOR_ENSG00000155792.5	842	1394	772	1132	1218	816	1232	1955	611	935	2153	628	1453	330	446	503	263	317	152	248	387	303	552	2270	228	610	171	165	3560	369	2851	1142	839	1254	164	443	220	1289	978	488	691	1254	1928	532	2059	1588	2425	1642	1914
Y_RNA_ENSG00000202345.1	12	18	2	3	2	1	1	0	1	2	15	1	7	0	6	1	0	0	0	1	0	2	5	2	0	0	2	1	3	4	19	4	11	32	1	1	1	2	7	5	3	11	8	3	0	9	38	11	5
THAP8_ENSG00000161277.6	329	338	193	318	261	679	506	332	324	264	554	347	298	644	224	270	169	17	381	393	226	227	334	248	86	287	196	76	410	253	623	527	936	394	387	247	707	444	493	257	182	363	328	83	816	359	856	395	574
AC004223.1_ENSG00000224113.1	113	138	118	41	142	73	90	148	105	53	192	79	186	198	35	42	35	3	10	34	45	93	144	45	38	75	117	44	105	136	146	68	145	162	93	128	172	195	115	213	156	235	82	24	244	120	186	94	226
MIR140_ENSG00000208017.1	27	66	15	17	29	41	36	33	24	14	61	20	53	20	39	8	16	1	9	18	33	8	39	23	14	28	32	12	29	34	97	16	48	92	25	28	31	46	35	31	56	66	60	11	51	36	42	34	40
RP11-397H6.1_ENSG00000257470.1	1	0	4	2	21	1	1	0	0	2	0	2	0	0	4	10	2	0	4	4	3	0	4	0	1	1	4	1	3	3	1	53	0	2	0	8	0	1	1	3	11	1	0	1	0	3	1	0	1
MIR939_ENSG00000216133.1	342	766	451	607	456	615	604	592	232	649	232	771	387	522	1095	837	312	62	644	1179	1866	903	375	99	324	687	266	502	832	506	429	857	496	298	880	1113	404	705	863	438	1149	1480	925	508	638	593	391	594	843
snoU13_ENSG00000238914.1	0	0	0	0	0	0	1	0	0	0	0	0	0	0	0	0	0	0	0	0	0	0	0	0	0	0	0	0	0	0	0	0	0	0	0	0	0	1	0	1	0	0	0	0	0	0	0	0	0
7SK_ENSG00000222069.1	1	1	1	1	3	1	6	1	2	0	2	1	0	2	0	0	0	0	0	0	1	2	2	1	0	2	0	0	0	0	1	1	0	0	0	0	0	1	0	0	0	2	0	0	2	3	0	0	0
RP11-359P5.1_ENSG00000249996.1	76	128	25	24	42	106	134	148	100	35	129	47	132	113	12	39	6	1	20	37	12	25	191	9	10	28	44	13	32	39	202	108	120	90	26	21	94	62	91	16	13	23	23	22	48	53	112	68	94
RP11-324E6.6_ENSG00000256249.1	4	92	7	20	9	276	262	13	17	8	9	131	13	14	20	168	5	4	354	38	11	33	0	47	0	4	6	0	5	12	38	34	42	2	230	29	50	437	16	35	27	20	16	11	15	6	0	24	46
SIN3B_ENSG00000127511.4	6420	8330	3937	8488	6506	5326	8672	5956	8628	5888	8335	10275	7121	7265	6198	4141	5902	345	8919	7007	5186	4685	6583	1349	6333	3018	3223	1327	5259	9174	9418	5659	8516	6946	10330	11386	4280	8396	10870	14051	10427	15985	12894	6926	11196	4649	12061	8488	10462
DHRS3_ENSG00000162496.4	7869	10607	6092	10377	5681	23825	11100	6568	3686	5001	6503	6131	15855	4677	1487	8225	2135	719	6181	20793	3680	801	18481	4475	423	2637	2171	1234	25575	7453	10644	881	7476	13690	7368	8605	6527	9232	15838	4635	3745	2876	6027	1479	11107	36927	5460	4980	17411
NEUROD1_ENSG00000162992.3	3373	0	1119	214	42	113	101	8	0	2	1272	784	16	2	13	146	1146	20	30	115	358	2	196	25	0	48	259	2	3078	88	987	2	1483	629	6	325	31	210	161	1571	608	19	1446	88	0	1013	566	3741	516
AC006207.1_ENSG00000118976.5	56	80	47	57	41	59	60	59	77	53	64	82	61	66	26	33	34	11	34	61	41	51	42	53	36	29	40	112	73	46	107	42	54	100	45	62	98	74	62	64	75	69	65	40	96	89	62	49	48
AC068279.3_ENSG00000224881.1	19	17	26	14	38	27	19	25	29	8	40	35	40	9	6	18	9	3	24	11	3	5	20	21	11	5	39	2	12	48	5	13	11	13	7	44	7	110	26	61	58	210	13	12	26	20	15	9	16
OR52H1_ENSG00000181616.7	19	2	0	6	5	3	7	0	8	8	21	15	15	6	5	3	6	0	0	1	0	3	3	1	3	0	15	0	1	8	2	8	6	5	6	6	18	2	12	9	2	20	6	3	0	4	6	2	12
GARS_ENSG00000106105.9	4371	7615	1989	3367	2747	5618	7478	7690	3456	2457	3495	1867	5146	9013	1280	2560	919	308	1474	4419	1930	759	4547	4323	1183	5543	2233	1464	5244	2489	6360	3522	6075	7229	3960	1688	4161	4762	3640	2460	1037	1782	1885	1339	9198	3866	3348	5053	6067
snoU13_ENSG00000238763.1	72	165	65	87	57	78	93	40	65	128	87	55	83	79	79	86	62	18	167	139	90	109	118	40	57	10	83	42	49	189	122	71	99	65	83	92	61	79	86	86	78	82	88	61	36	57	120	79	54
RP11-844P9.2_ENSG00000248596.1	43	23	94	164	246	20	54	11	83	7	71	120	311	13	7	490	90	14	32	643	323	61	40	13	276	25	170	29	343	121	98	43	85	34	344	386	270	10	52	191	184	306	349	6	16	843	32	287	108
RP11-380D23.2_ENSG00000250103.1	0	0	0	0	2	0	0	1	0	0	0	0	0	0	2	0	0	0	6	0	0	5	0	5	1	0	4	0	0	0	0	0	0	0	0	0	0	0	0	2	0	0	0	1	0	2	1	2	0
CTD-2313J17.2_ENSG00000258382.1	53	25	84	34	46	154	137	25	53	83	55	153	52	24	52	53	16	0	62	55	109	55	20	2	55	36	57	27	88	47	23	49	20	39	28	72	45	89	50	42	90	129	63	23	64	57	19	36	42
RP11-433O3.1_ENSG00000225356.2	21	54	11	15	19	20	8	78	1	14	20	11	51	42	10	13	6	3	9	27	17	5	47	10	2	86	1	8	29	4	36	27	36	53	3	5	100	18	37	8	2	3	11	3	41	76	5	30	41
AC087742.1_ENSG00000243630.1	30	42	4	11	24	23	22	42	18	15	25	13	19	37	10	6	13	1	8	16	3	12	21	26	4	16	15	16	20	17	67	16	32	55	13	13	29	38	16	19	14	15	29	5	33	17	68	22	21
RP11-448K10.1_ENSG00000223841.1	6	0	4	0	10	0	8	16	0	2	5	0	2	5	3	2	5	0	0	1	0	0	6	4	2	0	0	0	1	2	4	0	2	6	0	2	5	19	8	0	6	0	2	0	6	4	2	0	17
TRAV9-2_ENSG00000211793.2	4	0	1	1	5	1	1	0	5	0	0	0	1	0	1	0	2	0	0	2	0	0	0	7	0	0	5	0	1	0	3	2	13	3	3	0	4	0	10	23	2	0	0	0	1	1	1	13	0
DST_ENSG00000151914.12	47598	36287	40423	33086	32891	34296	68677	5956	80697	41294	45832	73626	43680	64389	54253	22189	17807	20469	47589	31485	46769	12728	16904	9186	20285	10279	27179	6538	30766	43653	61063	30843	36338	50071	51174	54945	64564	49439	32235	22415	29174	35612	28285	16956	11250	31887	42128	24855	34330
HENMT1_ENSG00000162639.11	182	200	112	144	172	406	412	477	507	63	333	227	202	248	191	204	41	26	143	466	250	57	153	190	78	220	106	117	368	431	360	191	382	416	160	104	266	225	295	344	181	177	335	94	24	450	247	283	156
BRPF3_ENSG00000096070.14	1672	2739	650	927	1157	1089	1915	1996	1379	696	2411	1042	2363	1970	845	443	412	124	379	362	512	538	2247	1300	357	958	496	842	1253	975	3450	908	2003	3667	911	925	2648	1656	1459	1283	1562	1493	1582	673	1783	1896	3524	1539	1880
RP11-320L11.2_ENSG00000254783.1	94	75	113	116	215	132	93	107	81	112	73	161	111	45	337	100	76	14	148	111	146	186	79	22	88	134	178	58	62	253	32	136	90	77	57	67	59	110	122	145	132	207	117	71	57	140	84	66	69
SLFN13_ENSG00000154760.9	1360	2531	2683	1915	3856	2082	3994	2598	3661	893	1068	1885	3003	2381	666	1461	533	90	1019	1894	2560	1329	1034	1254	1215	906	1169	674	1760	2309	1295	4095	2821	954	1258	5855	2216	2492	2514	2306	1795	3038	1884	655	1916	1377	1746	1520	3308
KDM4D_ENSG00000186280.5	24	35	16	25	21	56	95	6	69	18	50	35	17	38	13	14	2	0	15	51	12	2	22	16	3	8	30	0	33	18	103	41	54	67	33	10	25	145	19	41	6	35	17	21	54	48	23	25	26
TRIM63_ENSG00000158022.6	34	2	40	5	5	9	26	8	0	9	102	13	11	0	90	21	34	3	2	8	10	42	17	17	0	0	0	2	45	12	5	2	5	37	1	7	7	10	33	26	40	10	6	6	1	8	28	13	10
PFKFB2_ENSG00000123836.10	2916	1114	2288	1371	755	1529	594	3796	948	965	3720	920	990	1900	561	774	1131	76	350	1430	2366	1063	3209	1967	1692	2543	1439	3357	5930	1156	2869	1768	2471	2319	419	971	1130	1123	1080	1934	1962	1828	2160	353	1671	2670	1893	1631	1132
RPS20_ENSG00000008988.5	21054	22853	11782	16075	20941	21851	25234	19022	19973	20800	13373	16733	14797	32388	8444	24540	6567	1457	11010	18118	3910	6456	17818	15594	3656	16268	8094	3998	24719	9442	22504	33009	23672	16293	23945	8610	25116	33561	11996	8136	4235	4276	10347	6397	27944	15089	13378	25724	25432
CTC-551A13.2_ENSG00000253613.1	10	6	1	8	6	2	6	1	11	4	11	15	0	0	3	2	0	0	8	6	0	3	1	3	0	1	1	0	2	2	9	3	5	0	7	0	0	0	0	2	0	7	23	2	0	3	26	12	3
AC009498.1_ENSG00000237271.1	0	1	0	0	0	0	0	0	0	0	0	1	0	0	0	1	1	0	2	0	1	0	0	0	0	0	12	0	0	0	0	0	2	0	0	0	0	0	0	0	0	0	0	0	2	1	0	0	0
U6_ENSG00000222522.1	0	0	0	0	0	0	4	2	0	0	0	0	1	0	2	0	0	0	0	0	0	0	1	0	2	0	0	0	0	2	1	1	0	0	0	0	0	1	0	0	1	0	0	0	0	0	0	0	0
7SK_ENSG00000222099.1	0	0	0	0	0	3	6	0	0	0	2	0	0	0	0	0	0	0	0	0	0	1	0	0	0	0	0	0	0	0	0	3	0	0	0	0	1	0	0	2	0	3	0	0	0	2	0	0	0
PLIN3_ENSG00000105355.3	3991	15700	2008	4969	2464	4964	8110	3402	6195	3706	4721	3060	8254	9425	1303	2872	1182	335	1867	4306	1092	2701	7761	5026	1612	3364	2077	1479	6989	2811	11955	4287	7375	6236	8239	1615	5743	6946	5238	1484	973	1762	3044	1926	8458	9414	5643	6160	7624
HOXB4_ENSG00000182742.5	767	388	718	2572	276	426	384	1361	500	544	1759	554	551	61	1565	1236	357	68	1286	803	1765	171	364	56	122	1827	2656	32	414	689	540	828	687	356	1071	962	221	204	609	281	444	1517	516	673	91	409	696	1390	421
RP5-1073F15.1_ENSG00000241913.1	15	12	12	15	10	13	6	22	16	12	18	16	14	27	10	7	9	2	11	12	5	8	16	7	7	9	7	8	8	2	18	11	11	18	10	9	15	18	6	3	0	11	9	1	16	8	7	9	17
C10orf114_ENSG00000204682.4	51	130	56	28	27	137	148	3	234	67	79	59	53	39	24	25	22	8	51	99	16	19	174	10	24	4	38	3	19	25	99	128	67	91	22	18	18	144	41	36	23	58	43	54	5	18	92	132	67
ZBTB7A_ENSG00000178951.3	9508	15395	10472	13800	10240	13685	19666	21626	12686	13127	10918	11666	18744	37032	7253	10578	7339	3101	7326	26265	11181	8850	16683	6641	6114	12585	3560	6175	21971	7069	23802	13202	18979	15242	7591	9323	12894	18410	15715	4141	5075	8512	11256	4721	18440	15530	11175	12050	16440
WDR16_ENSG00000166596.9	22	35	23	28	71	21	50	10	13	6	41	49	29	2	21	16	24	1	99	312	6	18	15	27	6	9	12	4	56	33	14	84	13	38	6	33	35	54	27	27	27	35	25	21	11	57	14	35	18
AP000770.1_ENSG00000237937.1	0	0	0	0	0	2	1	0	2	0	1	11	0	0	0	1	0	2	2	1	2	0	1	0	0	0	0	0	0	0	0	0	0	0	1	0	1	0	1	1	1	0	0	0	2	1	0	0	0
AC005355.1_ENSG00000250994.1	7	0	0	0	0	1	2	0	6	2	8	3	8	1	3	3	0	0	5	4	0	113	0	0	0	0	2	0	2	4	0	0	2	0	7	4	0	3	0	8	2	0	4	0	2	3	6	2	4
RAB6A_ENSG00000175582.13	5907	7126	2157	4009	2586	5129	3804	5212	4521	3797	5428	2536	4942	6047	2106	2170	937	447	3127	2535	1531	966	6151	6487	811	2175	4821	2552	4612	2881	8149	3434	5757	6293	2904	3717	6157	7421	4182	2104	1606	1889	3645	1748	4962	4256	6203	4465	4693
ZNF542_ENSG00000240225.3	963	324	283	262	346	1087	896	52	573	231	1062	360	231	44	191	83	190	21	40	128	92	19	502	102	91	26	982	11	315	444	757	318	752	910	245	139	130	243	383	459	360	363	399	272	47	206	1229	553	441
PSMD12_ENSG00000197170.4	1749	1739	819	798	1123	1437	1765	2200	1458	868	1273	1201	1191	2583	662	566	320	110	458	1354	424	364	1438	1320	298	1065	845	685	1681	639	1865	1171	1420	1533	843	474	1336	2111	1114	613	310	541	653	398	1687	1781	1203	1408	1226
STRADB_ENSG00000082146.6	668	940	485	414	779	448	925	734	541	534	875	715	698	1027	389	498	322	41	305	324	336	264	700	444	201	438	237	185	565	611	581	876	616	785	426	365	786	688	715	341	749	626	461	368	648	549	708	835	836
SMCR7_ENSG00000177427.7	619	1314	351	427	627	914	603	1178	421	308	1029	559	924	1347	180	574	349	15	280	778	211	310	1459	499	187	233	403	100	887	490	1919	748	887	1510	986	278	907	1421	865	317	416	1174	752	335	1423	533	1155	721	894
AL672183.2_ENSG00000233084.2	92	41	14	34	25	60	65	32	52	42	40	36	50	96	23	24	28	12	46	70	23	10	26	40	13	15	66	19	55	26	72	44	47	48	147	23	27	50	31	20	29	18	25	17	55	48	52	51	60
RPL15P18_ENSG00000228501.1	78	90	52	63	83	77	92	118	105	48	107	58	72	87	42	60	30	7	32	55	20	18	86	66	18	56	63	15	116	37	157	92	94	129	47	14	62	104	45	40	35	26	60	35	109	77	116	86	136
RP1-7G5.6_ENSG00000249094.2	0	1	0	0	0	4	0	0	1	1	1	4	0	0	0	0	0	0	8	0	4	2	0	0	0	0	7	1	0	0	1	0	1	0	6	3	0	1	0	2	0	2	0	0	0	2	2	2	2
MT-CO1_ENSG00000198804.2	2958821	2055171	7046177	6189274	5819552	2040797	2635781	5118052	3184717	3281674	2936210	3597941	1217926	1425510	4659212	2170301	2447317	4600197	5773916	599061	4222833	8337865	2808654	14924178	3860619	2610056	6969213	15479140	4728741	3149129	1236060	2801527	3660367	1778304	3823346	7838344	2792343	1191132	3317286	1827205	9453414	3416446	8576577	17823551	3156346	4167169	3276153	4557180	2346421
MND1_ENSG00000121211.3	45	111	38	32	64	169	188	175	91	31	30	56	39	66	17	69	12	15	18	141	48	53	26	70	33	141	16	65	186	35	109	71	95	42	25	30	106	52	38	35	11	38	16	24	126	127	17	118	59
FLYWCH1P1_ENSG00000239516.1	2	0	0	1	3	2	0	0	2	0	8	1	2	0	0	0	0	0	2	0	0	0	1	6	1	0	0	0	1	0	5	0	2	1	0	0	0	0	1	0	3	2	0	8	1	0	2	3	1
NHLRC3_ENSG00000188811.6	1035	1223	1052	899	1314	1401	1488	862	2203	1247	1409	2119	1344	1149	572	1209	517	44	775	771	913	291	967	156	417	489	663	115	1102	1393	1364	1083	1467	957	371	827	1588	878	639	1432	1024	1501	608	374	900	1128	953	1000	1478
RP11-538D9.2_ENSG00000250835.1	16	44	8	9	12	18	33	11	21	23	22	21	23	26	8	21	3	0	4	15	5	8	11	36	9	0	2	6	27	21	39	2	19	20	7	31	51	28	37	20	36	27	10	5	8	45	13	9	27
TRNAE41P_ENSG00000240129.1	0	0	0	0	0	0	0	0	0	0	0	0	0	0	0	0	0	0	0	0	0	0	0	0	0	0	0	0	0	0	0	0	0	0	0	0	0	0	0	0	0	0	0	0	0	0	0	0	0
MYO3A_ENSG00000095777.10	1756	27	446	145	140	96	132	5	38	67	577	245	29	143	31	72	550	52	20	120	92	5	124	75	73	2	193	10	757	216	306	190	418	363	22	197	14	96	202	675	463	80	352	127	6	221	208	805	202
Y_RNA_ENSG00000239040.1	97	100	97	219	70	284	156	127	135	392	120	137	110	93	290	122	34	5	114	49	135	24	141	42	38	15	51	46	188	88	252	94	127	113	91	152	122	102	83	85	27	40	79	17	101	119	93	103	113
U8_ENSG00000238519.1	4	4	6	10	9	5	8	0	22	12	6	7	3	11	5	8	6	0	8	19	3	7	12	13	6	0	4	2	3	6	11	17	5	8	9	13	6	2	8	12	28	6	1	4	3	11	13	6	10
AP004550.1_ENSG00000254573.1	1	0	0	5	1	0	0	5	0	11	8	0	0	0	5	2	2	0	1	0	0	0	0	6	0	9	0	0	0	14	0	0	6	0	0	0	0	0	1	4	3	3	5	1	0	0	2	0	2
OR8H3_ENSG00000181761.5	0	0	0	0	0	0	0	0	0	0	0	0	0	0	0	2	0	2	0	0	0	0	0	7	0	0	0	0	0	0	0	0	0	0	0	0	0	0	0	0	0	0	0	0	0	0	0	0	0
ZNF833P_ENSG00000197332.6	88	98	77	57	153	56	285	127	180	89	69	122	106	96	74	59	34	9	75	139	91	91	47	64	36	188	33	5	82	109	41	145	56	85	36	130	105	54	64	62	89	153	46	17	271	159	44	103	156
C17orf101_ENSG00000181396.7	1825	3388	1075	1284	1418	1447	2147	2100	1485	587	2086	1366	2429	3667	565	799	1156	81	769	2921	483	807	2971	354	298	1261	1287	222	2469	1019	4127	1491	2050	3068	1674	732	1260	3277	2023	1137	1212	1298	1117	549	3742	1896	2663	1655	2521
OR56B1_ENSG00000181023.5	9	0	3	0	9	0	4	0	2	5	9	17	1	0	0	0	0	2	0	0	0	2	2	7	9	0	0	0	2	9	0	1	4	10	2	9	5	4	6	40	9	9	0	0	0	4	8	0	9
CACNG1_ENSG00000108878.2	2	12	17	1	4	7	13	1	10	13	4	8	13	0	7	2	3	0	8	15	2	3	9	28	10	3	10	0	14	7	17	9	8	4	0	8	2	4	7	28	2	8	0	5	1	12	0	1	10
BX284650.2_ENSG00000231734.3	438	462	833	436	645	848	639	426	1610	403	700	880	1968	646	288	729	486	67	702	700	815	683	1454	61	246	281	615	24	300	1395	427	2070	874	396	395	649	530	775	991	1310	561	921	279	251	46	583	325	407	703
TRAV15_ENSG00000258482.1	2	0	0	0	0	0	0	0	0	0	0	0	0	0	0	0	0	0	0	0	0	0	0	2	0	0	3	0	0	0	0	0	0	0	0	0	0	0	0	0	0	0	0	0	2	0	0	0	0
RP11-557C18.3_ENSG00000253607.1	99	334	39	42	57	190	123	112	66	58	118	69	115	230	36	48	22	12	13	26	29	27	143	84	24	34	53	10	175	55	206	71	120	192	69	43	51	239	92	39	21	50	32	10	167	78	93	121	148
U2_ENSG00000222627.1	3	2	6	3	3	9	2	2	13	2	7	10	3	0	7	8	2	0	1	9	8	7	8	4	0	4	8	0	6	8	3	1	4	1	4	1	4	13	5	14	0	3	0	0	6	2	4	2	2
AC019100.3_ENSG00000225328.1	15	9	51	80	34	3	4	84	2	41	16	21	4	3	29	0	0	0	76	292	4	42	14	2	6	245	1	1	0	4	48	36	15	8	1	3	116	0	20	46	48	34	3	6	11	7	18	3	15
SECTM1_ENSG00000141574.2	476	776	755	470	784	1969	552	385	1043	210	787	175	1584	1291	299	635	103	144	116	4446	469	209	877	227	99	459	326	55	306	309	322	752	976	673	657	147	412	1101	5124	287	62	576	282	122	2667	1033	2147	3058	1819
RP4-562N20.1_ENSG00000255103.1	846	908	1015	1121	825	755	941	424	1446	1362	1199	872	1238	525	636	1343	300	94	310	728	874	505	704	429	557	631	704	596	1318	962	1352	489	722	2640	1190	1277	1303	946	1556	703	601	1209	2345	609	2396	1852	2052	1179	1249
KIAA1045_ENSG00000122733.9	167	10	10	10	34	28	22	11	57	7	42	9	15	6	28	4	4	0	16	18	12	25	17	23	5	12	7	0	13	11	39	10	31	76	82	34	3	25	17	31	36	57	2	44	13	7	101	44	17
C5orf55_ENSG00000221990.2	158	54	101	66	205	209	152	87	89	33	105	98	93	57	84	37	66	3	75	161	60	58	50	55	18	83	98	21	142	52	128	122	162	112	37	18	64	138	85	118	75	71	83	49	61	115	96	143	111
U6atac_ENSG00000221562.1	3	4	3	5	1	3	1	1	5	0	11	3	2	5	3	1	0	0	4	2	4	1	3	4	0	0	2	0	1	13	11	6	2	4	1	4	0	5	1	2	9	6	2	0	0	1	14	5	2
SNORA74_ENSG00000252917.1	21	38	14	13	14	22	26	21	19	13	21	11	25	21	12	6	3	2	7	15	10	4	21	26	3	8	10	18	24	17	28	16	22	20	13	8	16	42	8	15	6	9	12	6	19	20	17	16	13
OR6Y1_ENSG00000197532.1	0	0	0	0	0	0	0	0	0	0	0	0	0	0	0	0	0	2	0	0	0	0	0	4	0	0	0	0	0	0	0	0	0	0	0	0	0	0	0	0	0	0	0	0	0	0	0	2	0
NONOP2_ENSG00000237522.1	165	120	184	159	286	564	191	115	220	170	191	414	163	142	488	146	111	20	215	174	261	162	131	33	131	168	248	98	88	260	152	221	225	170	356	232	146	192	242	442	353	547	143	134	105	154	128	111	284
AL445384.1_ENSG00000223164.1	0	0	0	0	0	0	0	0	0	0	0	0	0	0	0	0	0	0	0	0	0	0	0	0	0	0	0	0	0	0	0	0	0	0	0	0	0	0	0	0	0	0	0	0	0	0	0	0	0
OR10R3P_ENSG00000198703.2	0	0	0	0	0	0	0	0	0	2	0	0	0	0	0	0	1	0	0	0	2	0	0	7	0	0	0	0	0	0	0	0	0	0	0	0	0	0	0	0	0	0	0	0	0	0	0	0	0
HIST1H2AM_ENSG00000233224.1	18	34	15	4	4	73	46	22	16	13	13	20	7	9	124	29	6	0	76	19	134	29	10	2	2	30	1	4	19	2	6	23	17	2	3	19	143	15	33	8	10	2	2	1	15	30	3	12	13
USP3_ENSG00000140455.10	1020	893	1059	920	935	1028	1277	2196	953	1239	1224	1191	1110	937	454	782	345	120	546	377	831	393	1076	1050	401	631	416	1032	1067	837	1862	744	1183	2090	692	832	1221	1381	781	970	860	1046	806	486	1402	926	1183	1186	840
RP11-314J18.6_ENSG00000229001.1	9	5	8	1	8	2	8	3	3	2	7	2	5	1	4	4	4	1	0	5	4	14	5	10	1	2	7	0	2	6	1	4	6	5	4	0	2	5	1	14	0	19	1	4	6	3	9	8	9
AP001052.9_ENSG00000241238.1	76	235	41	163	116	298	138	92	92	103	164	500	352	523	43	145	44	3	100	256	148	59	256	46	71	45	139	52	80	180	125	140	109	113	329	152	300	97	164	119	118	131	87	29	115	80	78	82	158
LCN15_ENSG00000177984.6	6	2	11	6	7	2	12	20	6	4	6	0	8	8	72	198	14	59	81	27	4	2	0	26	2	52	1	2	22	2	0	5	0	0	10	0	4	6	0	10	4	10	10	2	6	4	10	125	185
GRAMD3_ENSG00000155324.4	1065	2451	773	1429	842	1442	1415	871	839	1368	1414	1023	1506	3587	349	989	373	102	737	1155	548	308	1264	311	245	409	812	322	704	986	2183	965	1370	1604	1362	644	1430	1480	1158	679	723	943	923	635	692	1244	1321	1224	1576
C17orf67_ENSG00000214226.3	137	125	89	105	121	104	160	65	163	125	170	120	210	311	81	100	107	21	326	178	168	171	157	59	41	16	104	95	152	127	133	226	198	129	173	152	284	255	209	152	80	97	111	88	147	123	145	170	202
RP11-204E9.1_ENSG00000231754.1	1	0	4	2	2	1	0	0	3	0	2	1	0	0	1	2	0	0	7	0	2	0	0	3	0	0	0	0	0	0	0	0	0	1	0	1	0	0	0	1	3	2	0	0	0	2	0	0	1
RP11-90P5.7_ENSG00000253739.1	27	23	19	20	29	50	38	50	35	26	20	24	32	32	17	10	5	3	14	52	8	10	39	17	6	13	13	7	62	12	48	48	22	40	17	3	58	39	20	12	13	6	16	9	42	32	25	51	68
ZWILCH_ENSG00000174442.6	477	648	282	432	419	1083	1400	1002	779	387	517	248	568	636	240	356	86	44	177	339	216	231	428	756	157	433	236	309	544	295	1117	565	801	1115	314	388	911	764	425	538	356	386	289	194	1293	990	414	701	423
ZNF877P_ENSG00000226875.1	0	0	0	0	0	2	0	1	0	0	0	0	0	0	0	0	0	2	0	2	0	13	2	2	0	3	6	0	0	0	0	0	0	0	1	0	0	5	0	0	1	0	0	0	0	2	0	0	2
AL357172.1_ENSG00000240294.1	0	0	0	0	0	0	0	0	0	0	0	0	0	0	0	0	0	0	0	0	0	0	0	2	0	0	0	0	0	0	0	0	0	0	0	0	0	0	0	0	0	0	0	0	0	0	0	0	0
RP11-155G15.2_ENSG00000251513.1	4	0	0	0	2	3	4	0	0	0	2	7	5	0	6	0	0	0	1	2	2	0	1	5	0	5	7	0	0	1	0	0	0	5	0	2	0	1	6	0	0	0	0	0	0	2	0	1	0
RP11-360D2.2_ENSG00000225591.1	34	43	22	33	54	27	37	33	40	37	47	39	36	56	32	16	22	3	22	42	46	19	44	26	25	22	42	16	58	42	77	53	51	42	25	20	55	56	17	17	25	47	16	20	45	34	46	36	52
RP11-126O1.1_ENSG00000239659.1	0	0	0	0	0	0	0	0	0	0	1	0	0	2	0	2	1	0	0	1	0	0	0	6	0	0	2	0	0	8	1	0	0	0	1	0	0	0	0	0	0	0	0	0	1	0	0	0	0
HTR4_ENSG00000164270.13	3	1	1	1	0	1	5	0	299	1	4	10	0	0	3	2	2	4	3	0	1	29	0	37	0	2	2	0	1	0	0	4	2	0	2	0	0	2	13	9	0	1	7	2	0	6	4	4	3
CTD-2085F10.1_ENSG00000251306.1	11	1	11	4	6	3	22	17	3	8	9	13	17	1	1	6	1	2	1	11	3	14	20	8	6	6	4	7	4	1	3	2	10	1	1	4	7	7	15	2	1	6	4	0	10	10	1	9	6
RP11-475O6.1_ENSG00000233008.1	89	7	46	42	88	120	32	22	7	19	96	56	30	6	164	9	148	9	82	35	26	102	14	67	66	0	62	36	30	75	25	101	26	129	17	53	8	15	34	101	111	107	58	55	1	42	40	47	24
RP11-1G11.2_ENSG00000253208.1	89	33	126	347	94	17	32	40	88	238	29	82	77	163	144	54	129	71	217	189	158	138	104	20	127	65	95	66	157	149	82	109	57	8	27	319	103	12	160	117	95	271	196	128	75	257	31	198	78
DUOXA2_ENSG00000140274.8	2013	3391	1193	8130	2185	334	4128	280	6892	5237	6409	6372	4948	271	3259	666	2660	342	1111	6291	1236	739	2119	1795	796	17	294	1461	5357	13474	7601	2397	4220	6045	948	9804	43377	7924	18302	182	3644	229	5021	594	174	4486	1614	3272	6392
RP11-344L21.1_ENSG00000255210.1	7	0	0	0	0	0	1	0	2	0	0	0	3	0	0	0	0	0	0	0	0	0	1	3	0	0	1	0	0	0	0	0	0	2	1	0	0	1	0	1	1	0	0	0	1	1	0	0	0
CNGA1_ENSG00000198515.9	314	605	220	39	101	117	517	90	25	94	325	194	265	87	149	204	123	11	219	272	50	37	145	103	38	19	66	15	115	368	139	72	219	971	27	269	89	177	226	89	103	191	80	107	83	297	172	232	893
RP5-1068H6.3_ENSG00000226948.1	8	8	7	4	14	8	11	13	20	5	11	4	8	17	1	7	2	0	5	7	1	1	3	21	2	10	6	2	9	2	5	3	7	9	8	1	11	11	9	3	1	5	6	4	17	6	9	13	6
RP11-444B24.2_ENSG00000256708.1	2	0	2	1	7	0	1	1	3	3	0	0	0	0	0	0	0	0	0	1	3	16	0	0	11	0	1	0	0	3	0	0	7	0	0	0	0	2	0	7	0	0	1	4	0	0	0	4	0
MAD2L1_ENSG00000164109.8	84	550	25	116	54	363	483	782	118	60	100	56	98	228	28	57	10	3	45	224	15	47	92	481	7	139	85	47	393	78	194	122	170	172	47	25	330	192	52	78	38	42	47	42	649	686	60	307	189
FGF14-AS1_ENSG00000234445.1	1	0	0	0	0	0	0	0	0	0	1	0	0	0	0	0	0	0	0	0	0	0	2	2	0	0	0	0	2	0	0	3	0	5	0	0	2	1	0	0	4	0	0	0	0	1	0	0	1
snoU13_ENSG00000238337.1	5	4	9	8	5	6	11	15	14	5	12	10	12	15	1	7	0	1	2	2	0	0	7	4	1	4	5	2	8	7	24	7	7	16	4	6	12	13	8	5	1	4	6	5	7	2	14	10	8
U1_ENSG00000202496.1	21	9	42	9	24	24	32	26	45	19	29	30	51	27	13	17	16	0	20	22	20	33	42	4	24	12	18	5	22	34	18	55	25	18	10	30	33	17	18	39	20	19	4	7	0	15	13	18	37
C5orf58_ENSG00000234511.3	47	37	17	29	60	51	39	30	138	43	69	28	59	7	12	23	10	1	8	23	24	10	22	24	25	8	32	8	22	63	39	45	97	37	61	18	27	44	92	175	44	26	52	59	24	22	43	112	33
RP11-76E17.4_ENSG00000258831.1	3	0	0	0	0	0	0	0	10	0	4	0	0	1	0	0	0	1	1	4	0	1	0	3	2	0	0	0	0	0	0	0	0	0	8	0	0	0	4	4	0	5	3	5	0	0	0	0	0
RP11-664D7.4_ENSG00000248801.2	33	8	1	3	7	2	7	0	0	4	27	2	0	2	1	0	2	0	1	1	1	1	3	24	2	1	2	2	0	3	2	0	0	40	0	5	2	3	1	0	17	0	0	0	0	3	3	0	3
SNORA1_ENSG00000199405.1	9	14	9	6	13	18	17	13	10	10	14	6	8	10	16	3	5	0	8	6	2	18	5	30	8	5	2	6	4	9	8	14	15	6	3	5	11	6	4	6	8	5	6	0	9	7	5	6	7
AC118345.1_ENSG00000227293.1	0	0	0	0	0	0	0	0	0	0	5	0	1	0	0	2	0	0	8	0	0	0	0	0	0	2	0	0	0	0	0	0	9	0	0	0	0	0	0	3	0	3	0	0	0	0	0	0	0
FIGLA_ENSG00000183733.6	3	0	0	0	1	0	1	0	15	0	0	0	1	0	0	0	2	0	0	5	0	0	0	7	0	0	5	0	0	0	0	0	1	0	0	0	0	0	0	0	0	2	0	2	0	0	0	2	0
AC092066.6_ENSG00000236807.1	0	0	4	0	0	1	1	0	3	0	0	2	3	0	1	1	0	0	0	10	1	3	2	0	0	3	0	0	5	0	0	1	0	0	2	0	7	1	2	1	3	6	0	1	0	0	0	1	1
MIR99B_ENSG00000207550.1	6	1	9	5	4	3	9	1	7	7	1	4	1	3	1	52	4	2	0	29	20	3	9	0	1	1	2	0	4	17	5	6	0	1	9	9	2	3	18	5	3	4	2	2	1	1	4	1	3
RP11-270C12.3_ENSG00000224550.1	35	44	12	24	42	29	38	63	25	18	44	18	41	36	6	21	7	0	9	31	12	14	93	17	1	20	18	9	66	13	54	31	39	78	10	1	53	44	23	5	3	14	6	14	42	56	68	41	58
AC011290.4_ENSG00000227172.1	2	0	0	0	1	0	2	0	0	0	1	0	0	0	0	0	0	0	1	0	1	0	0	4	1	0	6	0	0	1	0	1	1	0	0	0	1	0	0	0	1	1	0	0	0	0	0	0	0
LTK_ENSG00000062524.9	673	190	394	513	4161	111	174	134	458	1193	150	121	4492	44	132	4999	58	164	94	5051	293	411	8645	556	167	4211	108	39	3246	326	1121	3842	1838	123	229	1075	6257	84	545	1152	106	433	4164	692	98	5183	941	985	10288
GPN3_ENSG00000111231.3	280	407	84	137	193	253	324	383	384	121	287	169	133	383	85	90	33	18	91	196	82	36	327	186	23	169	174	85	308	141	471	234	294	317	154	47	135	469	156	98	40	89	138	114	275	221	286	327	203
SLC16A10_ENSG00000112394.9	373	133	42	219	42	296	45	233	615	331	120	111	122	160	16	104	163	12	54	184	79	23	26	105	52	224	16	19	55	70	151	159	224	254	135	25	141	53	123	113	80	46	47	27	23	47	98	55	84
OR6K4P_ENSG00000180437.4	0	0	0	0	0	0	0	0	0	0	2	0	0	0	0	0	0	0	0	0	0	0	0	3	0	0	0	0	0	0	0	0	0	0	0	3	0	0	0	0	0	0	0	0	1	0	0	0	0
RP11-359H3.4_ENSG00000240774.1	0	0	0	0	0	0	0	0	0	0	0	0	1	0	0	0	1	0	0	0	0	0	0	0	0	2	4	0	4	1	0	0	2	1	0	0	0	0	0	1	0	0	0	0	1	0	0	0	0
RP11-409K20.8_ENSG00000225425.1	100	58	28	93	152	141	133	45	242	145	109	70	136	51	25	91	19	12	61	51	37	28	51	9	59	4	54	8	35	80	89	92	98	20	32	69	60	74	62	142	36	122	32	35	37	121	170	93	111
SNORA20_ENSG00000206649.1	0	0	0	0	0	0	1	0	0	0	0	0	0	0	0	0	0	0	0	0	0	0	0	4	0	0	0	0	0	0	0	0	0	0	0	0	0	0	1	0	0	0	0	0	0	0	0	0	0
RP11-862G15.2_ENSG00000258499.1	9	2	7	1	2	2	0	4	14	16	3	1	16	0	1	57	8	2	2	3	5	0	0	7	2	5	3	0	6	12	2	3	10	2	6	5	3	22	14	10	12	12	13	0	1	2	0	5	7
RP11-538P18.2_ENSG00000243150.1	91	65	34	39	75	114	59	74	148	50	57	48	80	80	45	59	16	11	44	137	33	20	76	64	14	38	86	19	128	33	65	106	90	59	48	18	128	144	52	32	46	9	39	20	103	78	34	63	72
AC007595.3_ENSG00000241759.1	0	0	0	0	0	0	0	0	0	0	0	0	0	0	0	0	0	0	0	0	0	0	0	0	0	0	3	0	0	0	0	0	1	0	0	0	0	0	1	0	0	0	0	0	0	0	0	0	1
snoU13_ENSG00000239136.1	6	3	2	1	6	0	0	4	1	0	3	3	1	0	2	0	3	5	0	14	0	1	0	1	0	0	7	1	7	1	0	0	0	8	0	6	1	2	2	3	1	1	4	2	0	4	2	3	3
RP11-314M24.1_ENSG00000240241.1	5	0	0	2	1	1	1	0	1	0	3	1	2	1	0	0	0	0	1	0	0	0	0	11	0	0	1	0	0	0	0	0	0	0	0	0	0	0	0	1	0	1	0	0	0	0	2	0	0
RP11-483F11.6_ENSG00000227351.1	10	0	4	1	7	0	5	1	0	2	2	1	3	0	7	1	5	0	5	7	1	20	9	3	0	19	1	0	0	2	0	0	1	4	1	1	0	9	2	0	13	5	2	3	1	2	0	4	4
RP11-555J4.3_ENSG00000230516.1	2	0	1	2	1	0	2	2	1	2	0	0	3	1	3	0	3	0	3	4	1	4	0	12	2	0	1	0	1	5	0	0	1	1	2	3	1	0	4	0	1	1	0	4	0	0	0	2	0
UCP3_ENSG00000175564.8	139	83	268	89	205	181	106	151	175	158	147	210	293	65	320	189	86	21	328	307	185	302	146	13	172	71	170	215	101	371	111	107	183	99	208	386	61	243	205	363	437	571	345	209	63	179	173	153	185
U6_ENSG00000212360.1	39	23	60	55	49	69	36	44	14	59	45	70	36	39	127	48	37	3	35	52	83	84	22	12	70	22	38	83	23	68	47	36	38	49	58	129	33	44	42	42	40	77	58	9	63	48	24	30	36
USP12-AS2_ENSG00000230641.1	4	3	2	0	0	4	1	0	1	0	3	0	2	0	3	2	2	0	2	2	2	1	0	3	0	1	0	0	4	1	5	3	1	6	2	5	4	1	1	2	0	1	0	0	7	0	1	0	1
AC068134.6_ENSG00000237087.1	0	108	4	1	4	6	9	0	0	0	27	22	8	8	74	5	0	0	8	2	7	0	4	2	0	0	23	5	6	1	11	2	74	0	0	2	88	9	4	1	6	26	1	3	0	30	3	2	29
RP11-6E9.4_ENSG00000249955.1	4	5	0	7	0	2	0	6	2	0	3	2	1	7	1	0	0	0	0	0	0	1	0	3	0	0	0	0	1	0	16	2	5	3	7	2	0	1	1	1	0	8	0	2	2	1	22	2	1
RNU7-85P_ENSG00000238884.1	1	0	0	0	0	0	0	0	0	0	0	1	0	0	0	0	1	0	0	0	2	0	0	0	0	0	4	0	2	0	0	0	0	0	0	0	0	0	0	0	0	0	0	0	0	0	0	0	0
PRICKLE2-AS3_ENSG00000226017.2	63	83	60	115	62	56	41	9	157	59	93	93	31	0	24	75	41	8	62	54	62	92	27	31	9	8	66	21	32	105	53	54	43	46	111	25	53	21	31	50	41	70	46	24	5	51	140	57	56
AC011933.2_ENSG00000228007.1	290	267	177	269	296	194	502	254	545	473	218	256	264	387	159	340	96	45	232	642	185	114	207	176	71	245	99	69	447	150	311	383	488	196	215	77	368	450	142	132	101	51	187	90	423	277	179	581	306
CHCHD1_ENSG00000172586.7	415	443	222	314	349	380	527	665	401	254	290	201	374	390	136	324	116	18	149	703	90	107	608	119	66	270	220	117	739	233	540	454	547	260	237	117	653	546	345	169	101	127	194	83	503	580	262	568	415
RP11-451G4.3_ENSG00000242790.1	1	0	2	1	2	0	0	0	1	1	5	0	1	0	7	1	2	0	2	0	0	2	1	2	0	2	0	1	1	9	2	2	1	0	0	0	4	0	1	0	1	4	0	1	1	0	0	2	1
CTC-338M12.3_ENSG00000248275.1	375	204	197	257	315	296	359	177	227	179	256	177	370	194	100	188	150	37	322	262	137	118	259	21	65	95	187	28	290	190	336	309	309	256	190	86	265	176	225	162	211	215	197	169	144	193	353	272	208
SNORD116-23_ENSG00000207375.1	2	2	7	4	5	2	2	0	9	0	18	5	8	2	0	2	1	0	2	0	0	0	6	0	1	0	1	1	3	6	4	6	6	8	7	7	1	3	3	8	6	9	4	4	3	7	45	5	7
OAS1_ENSG00000089127.7	1902	9820	2053	1887	1750	1155	8664	4188	1821	1393	888	1945	7679	4970	645	3027	617	505	2826	6262	2037	3050	1501	3496	629	2828	713	525	8426	3290	5484	1194	9290	3380	2177	2295	4145	5380	18671	869	850	1167	1901	633	8049	9783	1505	7707	9773
AL031661.1_ENSG00000241840.1	1	1	1	0	0	0	0	0	2	3	1	0	5	0	2	0	0	0	5	1	0	0	0	2	0	1	0	0	0	0	0	1	1	0	0	1	0	0	0	0	0	0	2	0	0	0	0	0	3
Y_RNA_ENSG00000200494.1	0	0	0	1	0	0	0	0	0	1	1	0	1	0	2	0	1	0	0	0	1	0	0	0	0	0	0	0	0	0	1	0	0	0	1	0	0	0	0	0	0	0	0	0	0	0	0	0	1
Y_RNA_ENSG00000199584.1	0	0	0	0	0	0	0	0	0	0	0	0	0	0	0	0	0	0	0	0	0	0	0	0	0	0	0	0	0	0	0	0	0	0	0	0	0	0	0	0	0	0	0	0	0	0	0	0	0
Y_RNA_ENSG00000206950.1	0	0	0	0	0	0	1	0	0	0	0	0	0	0	0	0	0	0	0	0	0	0	0	2	0	0	0	0	0	0	0	0	0	0	0	0	0	0	0	0	0	0	0	0	0	0	0	0	0
RP11-439L18.3_ENSG00000229017.1	4	16	20	11	23	19	23	0	14	18	20	45	26	13	60	6	17	22	113	34	11	22	7	17	43	49	44	13	9	24	11	51	7	3	28	56	9	20	25	37	44	32	9	31	0	15	18	6	14
AC113407.2_ENSG00000240055.1	0	0	0	0	0	0	0	1	0	0	0	0	0	0	0	0	0	0	2	0	0	0	0	0	0	0	0	2	1	0	0	0	0	0	0	0	0	0	1	0	0	0	0	0	0	0	0	0	0
RP11-366M4.1_ENSG00000240674.1	331	400	93	178	330	385	207	210	298	194	211	178	164	372	74	120	71	44	95	230	82	97	265	285	39	223	202	87	236	164	474	209	408	382	240	39	219	380	308	198	97	47	134	127	308	224	309	304	238
AC068287.1_ENSG00000233329.1	0	0	0	0	0	0	2	0	0	1	0	1	0	1	0	0	0	0	0	1	0	2	0	4	0	0	0	0	0	0	0	0	0	0	0	0	0	0	0	0	0	0	0	2	0	0	0	0	0
RP11-1149O23.3_ENSG00000246582.2	89	229	139	194	265	247	217	253	121	170	102	171	231	413	167	140	26	17	126	492	97	167	487	110	134	125	34	123	478	101	367	222	196	244	63	81	354	546	292	137	80	177	126	58	325	340	92	247	186
FAIM_ENSG00000158234.8	700	629	403	166	797	552	551	427	291	244	877	582	750	479	347	340	174	32	196	329	109	163	1065	257	96	244	773	89	456	800	668	611	605	747	229	237	692	930	588	245	734	187	224	186	237	496	498	317	543
AC007064.24_ENSG00000237689.1	13	8	14	15	20	9	20	26	37	19	17	30	45	54	17	28	10	1	21	27	7	18	41	29	19	2	21	11	13	20	8	32	14	14	17	17	10	26	20	23	13	36	12	10	41	26	13	13	12
TECPR1_ENSG00000205356.5	7481	9534	4468	6741	4120	6417	6021	6538	8977	4932	7872	6074	15490	7738	2890	7858	4779	320	2103	7683	8592	4551	13984	1722	3587	4450	4390	2227	7191	7822	11250	5246	10996	15542	5472	5207	14475	8984	9770	8607	9090	8080	10979	5718	10320	5375	10110	10952	11465
RP11-202H2.1_ENSG00000258185.1	1	0	0	0	0	0	1	0	0	0	0	0	0	0	0	0	0	2	0	0	0	0	0	7	0	0	0	0	0	0	1	0	0	0	0	0	0	0	0	0	0	0	0	0	0	0	0	0	0
MAP4_ENSG00000047849.17	21914	24123	10107	24479	9681	15856	18550	18071	17604	23524	30599	13270	13263	20909	7245	14146	7527	2794	8062	12563	12135	7262	23701	11264	6610	5302	8826	8092	21049	13030	39227	25314	21474	26331	24898	12109	12235	18084	15813	13691	10410	14419	16391	13377	21319	23861	49231	18707	22668
RP11-247A12.2_ENSG00000204055.4	449	604	450	1225	266	790	1061	1203	1453	873	647	469	725	1395	538	999	398	153	427	4040	535	1068	915	206	582	109	127	2049	1562	312	1605	817	935	373	656	664	196	1019	642	172	634	191	445	365	818	686	332	1902	814
SNORD115-3_ENSG00000199970.1	0	0	0	1	0	0	0	0	0	0	0	0	0	0	0	0	0	0	0	0	0	0	0	0	0	0	0	0	0	0	0	1	0	0	0	0	0	0	0	0	2	0	0	0	0	0	0	0	0
ZNF385D-AS1_ENSG00000225542.1	71	17	36	5	41	2	6	0	136	20	11	8	3	0	6	8	38	0	4	1	3	4	26	2	8	2	12	0	28	21	16	3	42	36	0	2	3	0	11	14	28	18	7	48	2	7	32	53	7
SNORA81_ENSG00000252677.1	1	0	0	0	2	0	9	7	36	1	2	1	3	6	3	0	1	0	18	15	3	17	3	0	0	1	1	0	0	1	0	6	0	3	3	3	6	10	7	1	2	5	1	1	6	4	2	4	1
RP11-425L10.1_ENSG00000244313.2	5155	9244	2477	3875	4987	5915	8618	8346	7704	3827	4343	3940	4955	9472	2856	2941	1584	1018	1998	5891	2541	1979	6544	3045	1316	4420	2530	1166	6342	2399	11711	5020	10757	7053	3963	1009	6134	8214	2938	2397	2544	1267	3242	2443	6443	6850	5417	7292	6820
RP11-87O11.1_ENSG00000224493.1	5	0	0	0	0	6	1	0	32	0	0	0	1	1	0	0	0	0	0	2	0	0	0	6	0	0	0	0	0	0	0	2	2	0	0	0	0	0	0	0	0	0	0	0	0	0	0	0	0
TSSK1A_ENSG00000231086.1	7	2	6	5	15	24	1	3	0	1	11	10	6	10	13	5	6	0	12	8	3	5	5	0	2	0	3	0	2	2	2	2	10	11	0	3	12	17	4	4	10	12	6	4	3	2	6	4	7
MIR1306_ENSG00000221366.1	48	62	105	73	82	98	63	76	51	77	43	90	41	27	98	60	54	10	102	57	127	110	59	14	32	149	99	16	52	129	77	60	65	64	68	41	17	58	68	76	48	82	82	52	55	33	48	44	41
PTX4_ENSG00000251692.2	5	5	2	16	7	36	30	4	11	3	19	6	11	16	14	24	1	1	7	9	2	2	18	13	0	3	32	1	2	22	7	7	7	10	45	5	2	4	13	5	8	20	23	5	15	3	106	4	13
SMG5_ENSG00000198952.5	8196	15881	5359	10330	7260	14174	8894	11417	8306	5807	12267	8707	11515	13157	9702	13598	3681	439	6463	11483	6749	5751	23655	7992	6748	7097	5495	6376	10285	10007	16520	17889	12001	18220	10281	12181	13228	16967	14315	16192	10058	25000	11492	4398	16447	16200	16593	9750	15339
Y_RNA_ENSG00000202476.1	0	0	0	0	0	0	0	0	0	0	0	0	0	0	0	0	0	0	0	0	0	0	0	0	0	0	0	0	0	0	0	0	0	0	0	0	0	0	0	0	0	0	0	0	0	0	0	0	0
MNDA_ENSG00000163563.7	1232	123	215	156	292	377	453	104	2169	423	455	260	880	127	258	204	107	32	82	507	237	135	61	375	106	84	275	10	153	208	1195	337	1129	141	129	111	239	353	909	244	112	69	233	390	192	270	187	709	379
5S_rRNA_ENSG00000212290.1	32	64	13	11	11	46	37	22	21	6	58	23	26	41	9	8	6	3	7	10	12	6	39	9	3	15	19	4	30	17	41	15	31	47	16	8	27	36	11	14	7	10	12	6	14	22	44	19	14
RP11-471B22.2_ENSG00000258424.1	1209	1124	451	622	664	1106	1378	1973	756	457	909	378	489	492	258	320	264	95	175	673	194	166	790	638	166	901	956	381	1205	399	1375	667	1208	1307	438	148	928	1326	770	365	263	373	610	268	1201	989	1181	1052	993
AL109938.1_ENSG00000256162.1	11	7	19	0	2	2	2	1	9	0	13	2	1	2	6	0	4	0	0	2	2	4	1	13	0	6	0	1	0	8	4	5	0	6	0	0	12	2	2	0	1	2	8	0	4	5	0	27	1
U3_ENSG00000201368.1	0	0	0	3	0	0	0	0	0	0	1	0	0	0	0	0	0	2	3	0	11	0	0	0	0	0	3	0	0	0	0	4	0	0	2	1	0	0	0	0	0	0	0	2	0	0	0	0	0
U1_ENSG00000253000.1	0	0	0	0	0	0	0	0	0	0	0	0	0	0	0	0	0	0	0	0	0	0	0	2	0	0	0	0	0	0	0	0	0	0	0	0	0	0	0	0	3	0	0	0	0	0	0	0	0
MIR548A3_ENSG00000208032.1	1	0	0	0	0	0	0	1	0	0	1	0	0	0	0	0	0	0	0	0	0	0	1	0	0	0	0	0	0	0	0	0	0	1	2	0	0	1	0	0	0	0	0	0	1	0	0	0	0
Y_RNA_ENSG00000199472.1	26	51	24	23	28	37	43	30	24	28	33	26	31	33	25	24	9	0	24	31	12	27	29	23	20	25	30	11	34	42	44	17	30	44	21	17	36	33	27	16	27	28	24	13	32	52	30	18	28
GIP_ENSG00000159224.4	4	11	23	4	0	0	6	7	3	0	0	1	0	0	12	3	3	3	0	0	13	0	1	6	0	1	0	0	1	0	0	2	0	0	1	0	2	2	4	0	0	1	1	2	1	2	6	2	7
TRABD_ENSG00000170638.5	10122	42306	8956	28276	17667	33649	17776	30285	11991	14076	12024	17884	16606	27859	12190	17351	13865	794	14138	19227	19207	12134	26187	3886	13904	29227	6762	12482	28558	15593	28040	19524	21505	26141	41211	14748	20898	26191	31631	32061	18174	41696	39704	14315	58523	12959	14731	26677	32863
SLC25A41_ENSG00000181240.8	43	45	14	72	2	8	72	25	92	67	22	213	230	6	31	8	8	9	59	32	5	45	31	24	76	22	55	3	78	183	5	38	35	9	24	51	560	10	84	87	3	42	14	53	145	155	150	79	71
RP11-169K16.9_ENSG00000179743.2	272	152	205	162	213	704	417	120	276	177	319	375	198	84	348	109	149	48	413	401	331	190	118	35	84	223	294	84	268	211	224	274	286	268	144	119	123	212	241	202	191	223	165	116	173	144	263	288	218
RP11-66C24.1_ENSG00000233814.1	7	4	0	4	0	5	4	2	6	1	0	5	6	1	13	1	2	0	5	1	18	14	2	2	1	3	0	11	5	14	0	0	4	1	3	3	1	4	4	3	1	5	0	1	0	2	3	1	2
AL137068.1_ENSG00000243738.1	3	9	3	3	2	11	7	1	9	2	10	4	7	9	8	8	0	0	3	20	3	4	3	1	0	3	8	3	4	5	6	7	6	12	7	3	2	6	5	0	3	14	4	1	5	5	6	8	2
DPM1_ENSG00000000419.7	954	1527	421	724	750	1685	1816	1050	1277	676	851	703	1155	2240	371	455	144	32	435	658	439	157	1041	627	177	481	601	289	1425	773	1329	737	1139	1291	603	341	1350	2165	625	565	288	423	484	252	1063	1618	1086	880	1090
NUFIP2_ENSG00000108256.2	3378	4252	2632	3086	2593	2913	3541	3970	5220	2542	4701	5130	4928	7308	1908	1400	889	149	2952	2974	1599	1438	2127	2134	883	1345	2043	1698	4712	2654	4992	4644	4301	4316	3408	2987	4673	6980	2690	1756	2002	2793	1855	1280	4330	4045	3293	3297	3636
WDR20_ENSG00000140153.11	932	1371	701	510	707	1155	1254	1090	610	591	1051	899	584	708	327	523	390	52	481	620	363	344	1032	409	214	364	484	252	1032	695	1403	591	845	1398	623	763	1016	1488	957	624	666	860	648	306	1074	871	859	663	1063
UGT1A9_ENSG00000241119.1	782	12524	501	1123	86	3236	2483	719	671	1817	187	3000	817	2066	228	1641	39	259	500	10113	657	96	159	485	26	849	8	31	2580	1007	1197	143	478	4021	762	1178	2933	6249	622	221	260	238	583	9	1293	5897	416	46	5619
CTA-242H14.1_ENSG00000239622.1	0	4	1	0	0	0	4	0	2	0	2	1	0	0	0	0	0	1	4	1	0	0	0	1	1	0	2	0	0	0	0	1	1	0	2	0	1	1	0	0	0	0	1	0	3	1	1	0	0
RP11-270F18.2_ENSG00000224001.1	26	224	8	47	10	141	202	38	26	25	40	89	81	384	11	19	4	3	123	40	8	34	103	18	19	6	7	10	22	41	113	18	72	17	134	24	38	254	40	10	35	30	28	20	51	50	38	40	28
MTCYBP4_ENSG00000220113.1	0	0	1	0	0	0	0	0	0	0	1	0	5	0	0	1	2	0	0	0	0	0	0	0	0	0	1	0	3	0	0	0	0	0	0	0	0	0	0	0	1	0	0	0	0	0	0	0	0
ABCB10_ENSG00000135776.4	521	1155	485	366	431	530	555	652	510	335	1037	455	640	833	186	234	176	34	186	235	339	142	1481	298	106	218	268	149	532	472	1112	891	747	752	313	284	619	579	414	369	499	430	305	301	748	594	948	562	869
AC093602.1_ENSG00000240723.1	54	47	25	24	44	25	30	14	52	38	47	42	41	38	17	32	13	3	29	21	32	58	42	17	13	6	4	28	34	40	26	34	26	38	25	39	35	19	43	31	35	45	27	11	30	27	51	28	38
RP11-875H7.5_ENSG00000242317.1	0	0	0	0	0	1	4	0	0	1	0	6	0	0	0	0	1	0	0	0	0	0	0	3	0	0	2	0	0	0	0	0	0	0	0	0	0	16	0	0	0	0	0	0	0	0	0	0	1
MT1B_ENSG00000169688.9	0	17	0	19	0	52	7	4	6	12	16	0	6	51	2	36	6	0	0	29	0	0	1	23	0	0	0	0	4	18	0	6	1	1	681	0	50	15	18	1	3	0	0	42	0	27	0	30	3
RP3-329E20.2_ENSG00000236936.1	223	273	77	119	107	374	135	70	294	145	295	79	339	310	24	84	52	6	51	73	17	43	375	25	37	33	37	18	205	148	257	29	301	397	102	114	87	224	172	201	65	101	112	37	161	187	425	178	251
CICP12_ENSG00000225270.1	5	5	6	2	2	2	6	1	3	1	4	2	5	6	10	2	0	2	1	4	2	2	1	10	0	2	2	0	1	1	1	3	3	7	1	4	1	1	0	3	6	4	3	4	4	3	5	0	7
RP11-597A11.9_ENSG00000258564.1	0	0	0	0	0	0	0	0	0	0	0	0	0	0	0	1	0	0	0	0	0	0	0	1	2	0	15	0	0	0	0	0	0	0	0	4	0	0	0	0	0	2	0	0	0	0	0	0	0
FOXE3_ENSG00000186790.4	3	4	19	3	25	12	9	29	9	7	10	6	7	0	14	21	16	4	15	23	14	41	0	2	13	17	2	8	0	14	3	4	3	0	6	3	0	0	8	12	2	6	1	0	20	11	2	12	4
AC007528.1_ENSG00000215923.1	2	1	2	0	3	6	4	3	2	0	2	3	5	5	6	4	2	0	1	1	16	0	17	5	1	6	6	0	1	5	0	14	7	6	0	2	4	5	11	0	0	6	0	0	0	1	1	2	9
RP11-457K10.2_ENSG00000214380.4	11	31	1	12	3	0	2	1	15	0	1	1	6	73	2	0	3	2	2	8	0	0	0	4	0	0	0	0	18	1	2	6	9	2	3	2	43	61	1	0	0	3	9	8	31	14	10	1	60
PRCD_ENSG00000214140.4	294	317	188	423	258	172	173	47	305	125	222	253	216	41	33	193	86	7	38	526	68	95	599	32	63	78	90	13	85	87	241	131	381	350	307	58	206	214	338	137	192	78	334	339	131	136	209	318	388
5S_rRNA_ENSG00000201968.1	0	0	0	0	0	0	0	0	0	0	1	0	0	0	0	0	0	0	0	0	0	0	0	0	0	0	0	0	0	0	0	0	0	0	0	0	0	0	0	0	0	0	0	0	0	0	1	0	0
RP11-4M23.7_ENSG00000215905.3	0	0	0	0	0	0	0	0	0	0	0	0	0	0	0	0	0	0	0	0	0	1	0	5	0	0	0	0	0	0	0	0	0	0	0	0	0	1	0	0	0	0	0	1	1	1	0	0	0
RP11-9B6.1_ENSG00000248511.1	0	0	0	1	0	0	1	0	0	0	0	0	0	0	0	0	0	0	2	0	0	0	0	5	0	0	0	0	0	0	0	0	0	0	0	0	0	0	0	0	0	0	0	0	0	0	0	0	0
U6_ENSG00000206796.1	0	0	0	0	0	0	0	0	1	0	0	0	0	0	0	0	0	0	0	0	1	0	0	0	0	0	0	0	0	0	0	0	0	0	0	0	0	0	1	0	0	0	0	0	0	0	0	0	0
RP11-543B16.2_ENSG00000226986.2	76	176	51	66	87	141	122	212	62	50	49	44	117	104	18	59	19	8	32	96	23	38	165	60	22	112	23	20	158	55	141	139	150	167	66	16	147	115	103	19	13	37	70	24	151	144	82	128	107
RP11-142C4.2_ENSG00000255189.1	21	5	9	0	27	31	4	2	64	7	38	7	9	2	96	2	6	2	0	1	10	3	7	12	22	17	2	0	12	13	10	46	5	31	0	2	4	3	11	85	75	11	7	13	5	7	7	6	12
XXyac-YRM2039.3_ENSG00000227518.1	309	274	515	281	608	517	306	439	360	427	412	801	404	271	832	397	393	62	935	395	939	570	324	74	384	656	489	326	462	498	298	628	412	199	559	331	400	283	425	398	282	753	295	215	188	323	233	321	285
SNORD112_ENSG00000251801.1	0	0	0	0	0	0	0	0	0	0	0	0	0	0	0	0	0	0	0	0	0	0	0	2	0	0	0	0	0	0	0	0	0	0	0	0	0	0	0	0	0	0	0	1	0	0	0	0	0
PRR23B_ENSG00000184814.5	0	0	0	0	0	0	0	0	1	0	0	0	0	0	0	0	0	1	0	0	0	2	0	11	0	2	0	0	0	0	0	0	0	0	1	0	0	2	0	0	0	0	0	0	0	0	0	0	0
SH3BP5L_ENSG00000175137.9	1679	3685	1181	1942	1464	2703	1945	3597	1873	905	3149	1705	2462	2409	1787	1279	837	191	863	2414	1338	1285	7089	846	1063	1325	1039	1421	2172	1710	5763	4075	2756	3049	1685	1355	2294	2953	2372	1757	1891	3295	2533	1214	2852	1748	3555	1664	2581
SNX18P8_ENSG00000231390.1	39	35	9	10	23	31	50	43	4	16	23	57	41	105	10	23	84	3	21	53	5	157	44	3	11	5	16	6	50	59	16	76	12	43	78	120	8	113	23	74	65	93	50	54	65	129	46	107	41
U6_ENSG00000238509.1	0	0	0	0	0	0	0	0	0	0	0	0	0	0	0	0	0	0	0	0	0	0	0	1	0	0	0	0	0	0	0	0	0	0	0	0	0	0	0	0	0	0	0	0	0	0	0	0	0
RP11-309L24.6_ENSG00000224163.3	101	148	42	255	57	97	53	23	29	171	2457	36	57	46	733	98	21	0	29	477	53	23	129	9	9	5	18	214	21	81	340	137	63	51	194	55	90	397	219	108	114	1679	30	75	213	71	9701	50	98
RP11-159F24.6_ENSG00000248554.1	6	9	10	6	9	25	25	7	28	13	13	23	15	8	18	14	7	3	13	42	21	11	13	2	13	12	11	9	7	12	8	25	13	7	13	16	13	46	8	16	11	19	6	5	16	14	1	12	15
RP11-389K14.1_ENSG00000185074.6	1	0	4	3	5	1	3	3	0	6	2	0	5	6	6	0	1	3	3	4	8	3	3	9	2	0	2	3	3	5	2	8	7	4	5	3	9	6	5	3	2	4	3	3	8	2	3	3	0
SPATA16_ENSG00000144962.6	2	0	0	0	2	0	3	0	0	0	0	2	0	0	0	2	4	0	2	1	0	1	0	33	4	0	0	0	1	2	0	1	0	0	3	4	0	0	0	1	1	2	0	1	4	2	0	4	0
AC093700.1_ENSG00000221314.1	0	0	0	0	0	0	2	2	0	0	0	0	0	0	0	2	0	0	0	0	0	0	0	2	0	0	0	0	0	0	0	0	0	0	0	0	0	0	0	0	0	0	2	0	0	0	0	0	0
ZNF197-AS1_ENSG00000233509.2	24	1	13	7	16	11	11	2	32	7	18	32	7	5	3	9	3	2	9	7	20	16	8	9	3	2	37	0	19	16	7	19	18	10	6	6	18	6	13	21	6	15	8	7	2	14	14	11	24
5S_rRNA_ENSG00000252512.1	12	13	1	3	4	2	6	1	15	1	5	2	7	3	7	0	0	1	1	0	1	0	12	0	2	0	2	1	1	16	5	0	4	8	4	1	4	8	6	5	11	14	11	9	6	3	32	11	4
IL6ST_ENSG00000134352.14	8744	7209	2761	3137	4531	4238	4697	1831	13758	2895	10262	3207	5082	4446	1624	2193	1261	113	1446	2246	496	416	3345	1113	434	679	6852	367	4390	3959	8957	3990	7194	13078	2407	1799	3911	3997	4531	3792	2386	1860	2534	2119	2239	3811	12687	6080	5157
RPL7AP60_ENSG00000213152.4	151	110	168	202	183	157	131	157	142	165	117	168	64	69	329	168	152	89	345	297	428	138	94	13	138	193	181	160	151	271	75	153	140	79	132	208	85	105	184	124	195	222	204	139	105	114	83	197	128
RP11-517P14.6_ENSG00000180812.9	114	127	107	125	113	126	228	81	166	95	159	98	191	178	292	63	56	14	87	131	86	87	116	20	106	116	128	255	225	125	124	186	134	85	87	117	148	136	172	152	48	174	117	47	103	133	93	244	117
AC010326.1_ENSG00000252632.1	45	29	77	38	30	77	149	30	62	50	91	102	123	90	196	41	42	8	157	59	93	22	27	5	53	41	34	35	26	64	48	65	44	24	43	48	30	73	60	33	52	33	30	17	37	25	27	24	37
IGKV1D-32_ENSG00000253191.1	0	0	0	4	0	0	0	24	12	0	0	0	0	0	0	0	0	0	4	0	0	0	4	0	0	0	4	0	8	0	14	0	4	0	0	0	8	0	8	0	0	0	0	0	17	0	19	39	42
SDR39U1_ENSG00000100445.11	8021	9686	7565	11189	11549	7221	13477	9580	6438	7077	7622	11550	8964	5012	4365	7966	7862	400	11756	12659	5789	6421	9648	2700	5279	5639	5872	1620	11280	12400	9434	5074	8238	10176	8520	10842	10522	17896	13506	19979	16897	14927	11389	6576	14065	11789	8510	8652	11240
AP000233.2_ENSG00000232512.1	0	0	2	2	0	1	0	2	0	0	0	0	0	0	0	0	0	0	0	0	0	0	0	0	0	0	0	0	0	0	0	0	1	0	0	0	0	0	0	0	0	0	0	0	0	0	0	1	0
AP002965.1_ENSG00000181214.6	0	0	0	0	0	0	0	0	0	0	0	0	0	0	0	0	0	0	0	0	0	0	0	3	0	0	0	0	0	0	0	0	0	0	0	0	0	0	0	0	0	0	0	0	0	0	0	0	0
RP11-10N16.3_ENSG00000232298.1	1	3	1	0	0	1	9	1	17	3	6	8	3	0	0	0	5	5	1	5	5	0	0	5	0	2	4	1	1	5	0	9	2	10	1	7	2	0	5	5	27	3	1	2	1	1	1	1	8
TRAV8-3_ENSG00000211787.1	0	0	0	2	12	2	3	0	5	4	2	0	3	0	0	0	0	0	0	2	3	0	1	3	5	3	9	0	2	4	4	0	21	3	0	0	2	1	0	29	0	1	1	1	0	5	2	21	1
AC104395.2_ENSG00000236198.1	2	1	0	2	0	1	3	3	5	0	2	6	3	0	1	0	0	0	1	2	0	0	2	0	0	2	0	0	0	0	1	1	2	1	1	1	2	1	1	1	1	1	0	0	2	4	1	2	2
ELAC2_ENSG00000006744.10	4073	4659	2255	3234	3916	4393	3400	5762	3023	2469	4875	3112	3756	4855	2417	2591	2047	244	2117	4407	2821	2493	4027	2799	3763	2932	3169	2382	5008	3658	8717	4196	5068	6586	12772	3080	2953	4459	3501	4233	4368	3732	5160	2316	9296	4893	7274	5673	4332
RP5-857K21.11_ENSG00000198744.5	101973	93134	212458	126988	205009	62393	85156	188483	85992	88921	88883	122062	50179	91321	172150	93349	32234	139726	176751	17795	194675	299358	93294	310770	60381	100304	198064	411440	143339	78651	35990	61705	116801	49513	92705	112845	81840	30625	67786	46616	311509	93212	155826	353320	85563	127410	84003	133351	73424
AP000244.1_ENSG00000256386.1	0	0	0	0	0	0	0	0	0	0	0	0	0	0	0	0	0	0	0	0	0	0	0	2	0	0	0	0	0	0	0	0	0	0	0	0	0	0	0	0	0	0	0	0	2	0	0	0	0
SIGLEC7_ENSG00000168995.8	120	31	10	49	43	122	65	33	374	39	50	40	169	29	16	35	44	10	18	180	30	6	20	39	16	9	193	0	12	115	112	14	194	33	40	44	47	42	150	56	19	43	73	61	44	61	45	101	40
AC144568.2_ENSG00000253896.2	5	2	5	4	2	0	4	4	3	2	0	8	6	4	0	2	2	1	4	7	4	0	4	0	10	0	19	0	4	7	6	3	12	2	6	3	1	10	0	6	0	4	12	1	2	2	0	0	2
RP4-725G10.3_ENSG00000230191.1	35	67	31	54	38	31	107	9	76	44	30	22	92	61	9	34	22	4	19	118	18	9	58	17	20	21	19	9	58	40	63	103	158	69	54	16	60	116	161	21	27	24	20	34	84	235	59	91	118
USP46_ENSG00000109189.7	541	752	277	359	547	1586	382	638	536	313	763	504	346	567	498	291	257	99	263	476	293	292	522	824	136	158	1108	661	606	375	985	419	491	774	391	232	388	470	366	229	323	300	360	229	513	405	587	390	462
AC025278.1_ENSG00000204752.3	6	2	3	1	3	0	2	2	6	2	3	2	5	1	3	3	0	2	3	3	5	4	3	16	4	2	2	2	2	3	0	3	2	1	2	3	0	15	0	0	6	3	1	1	9	1	0	5	1
RP4-717I23.2_ENSG00000229567.1	68	125	61	95	127	161	134	169	181	90	76	110	81	186	50	57	24	15	67	230	29	35	76	43	29	103	62	18	260	65	139	129	155	84	90	45	201	188	108	70	42	44	67	52	278	107	92	164	154
PDLIM5_ENSG00000163110.10	9497	17363	3792	9413	4665	8564	9931	6624	14700	6111	10361	6458	6637	9308	1727	6081	1553	643	2038	4700	2806	1306	5932	5828	1435	1464	1525	1820	7338	4729	23021	9573	7768	10784	5804	3710	6295	6769	7485	2344	2918	3836	5198	2949	10296	9394	10904	7528	7211
POU3F3_ENSG00000198914.1	2	0	0	1	2	0	1	1	0	0	0	0	0	0	0	2	0	0	4	0	0	0	0	2	0	0	130	0	0	0	2	0	2	2	1	1	0	0	2	3	0	0	0	2	0	0	1	5	15
RUSC2_ENSG00000198853.6	4101	7846	2054	7113	2297	2626	5928	2508	3687	3188	8771	2669	3238	3498	1714	2480	3020	120	1182	2321	2687	1616	7037	1021	1351	1886	1395	692	3770	6071	11405	9400	4759	8983	7274	3746	3791	6677	5530	2945	5334	4932	6152	2923	4806	5535	17465	4771	6788
LRRC4_ENSG00000128594.3	894	1073	320	272	209	644	644	416	372	535	717	212	263	869	130	209	303	38	64	197	53	93	552	313	36	391	311	194	835	173	1237	248	734	1320	382	128	441	746	356	696	169	241	483	231	1129	598	781	666	643
MTND2P33_ENSG00000248907.1	0	0	0	0	0	0	0	0	0	0	0	0	0	0	0	3	0	3	0	0	0	0	0	55	0	0	0	0	0	2	0	0	2	0	0	0	0	0	2	0	0	0	0	2	0	0	0	0	0
AC074093.1_ENSG00000226674.1	37	10	19	19	13	25	26	0	320	5	13	21	4	42	0	9	3	5	20	1	4	2	5	59	10	3	22	0	16	12	17	30	23	19	29	14	6	15	11	34	47	206	16	21	17	22	15	50	30
THBS4_ENSG00000113296.10	5556	1959	1114	2567	802	505	2007	41	212	1183	9173	1018	360	155	321	980	886	63	91	354	148	70	3728	78	48	51	1721	23	649	806	7549	281	8999	9509	315	1126	74	804	2509	1676	1190	1598	1226	1481	61	1658	13532	2149	1413
AC105287.1_ENSG00000243260.1	94	164	90	149	95	194	124	217	142	122	103	129	113	106	96	163	71	10	145	110	155	75	99	51	74	53	82	42	113	198	108	119	77	103	103	147	62	169	146	113	97	85	89	30	86	94	58	99	100
HSDL1_ENSG00000103160.5	956	977	295	520	586	1374	910	642	689	337	1220	678	876	804	571	201	237	46	385	622	328	321	512	397	162	384	3946	232	688	814	1249	501	631	756	518	297	577	762	725	662	654	706	344	410	691	560	1188	696	610
AC092964.2_ENSG00000243398.1	58	143	23	63	22	79	55	19	112	46	75	72	43	154	24	58	15	2	40	31	42	25	75	41	24	18	20	32	40	60	112	61	60	70	141	101	82	124	62	31	42	50	46	19	58	50	90	60	49
PLA2G4E_ENSG00000188089.9	13	6	9	19	12	20	6	8	10	6	21	21	12	1	4	18	5	5	7	20	8	9	3	16	15	12	2	1	33	7	39	79	8	22	18	22	21	145	18	13	52	20	5	2	17	21	2	581	14
KRT1_ENSG00000167768.4	98	971	19	61	21	227	75	334	37	1	0	117	25	2567	0	140	2	16	13	252	0	0	406	33	2	2	0	0	133	47	126	4	18	264	1806	7	131	758	108	12	7	4	22	7	84	974	67	51	162
AC108209.1_ENSG00000221260.1	0	0	0	0	0	0	0	0	0	0	0	0	0	0	0	0	0	0	0	0	0	0	0	2	0	0	0	0	0	0	0	0	0	0	0	0	0	0	0	0	0	0	0	0	0	0	0	0	0
CCDC71_ENSG00000177352.9	766	853	355	413	494	613	731	1581	537	312	684	590	590	466	147	565	183	46	162	834	160	129	1149	393	182	145	282	109	1363	357	1598	645	756	1147	314	184	652	840	585	578	398	381	598	250	1047	990	827	646	1036
RP11-206L10.5_ENSG00000240618.1	213	73	373	94	465	207	216	142	432	403	386	345	286	329	187	58	65	25	253	258	429	349	103	31	142	139	135	184	203	113	57	174	159	120	136	155	116	119	85	98	137	177	109	91	98	55	87	185	119
AP002387.1_ENSG00000172900.7	2	0	2	1	1	1	2	0	2	2	1	5	4	3	2	3	1	4	3	0	3	0	0	12	2	2	2	1	1	1	0	0	1	0	2	1	0	0	2	1	2	1	1	8	1	2	0	2	1
RP11-136K14.3_ENSG00000226599.1	53	27	83	53	72	33	43	21	32	79	74	43	105	62	48	23	19	5	35	33	69	99	12	6	53	68	26	18	25	64	38	20	72	10	16	24	22	24	46	105	32	54	49	33	17	17	32	75	55
PRICKLE2-AS2_ENSG00000241101.1	8	40	3	18	9	5	21	0	27	8	61	23	7	4	0	10	4	1	7	5	3	15	28	19	0	0	4	1	14	18	47	15	12	29	55	14	11	5	21	11	31	32	22	37	1	10	143	7	18
S100A12_ENSG00000163221.6	0	0	2	1	0	5	0	0	3	0	0	0	0	0	4	0	0	0	2	0	4	9	0	28	0	0	0	0	0	12	0	6	4	0	1	0	0	0	4	2	0	0	0	2	0	0	4	0	0
C4orf22_ENSG00000197826.7	2	4	5	2	8	16	10	1	4	12	28	6	3	8	3	6	11	5	10	98	15	2	1	52	1	2	5	3	15	4	1	7	9	2	27	5	7	3	6	10	21	9	2	6	3	14	12	6	3
AL603831.1_ENSG00000239822.1	24	15	19	36	14	14	23	25	31	54	23	27	25	19	10	15	23	0	18	13	15	48	33	8	25	11	26	69	26	32	24	19	18	7	18	45	29	9	31	37	36	23	24	13	14	17	39	14	15
LRP6_ENSG00000070018.4	2023	1788	1460	851	2123	2600	1863	3233	2580	940	2770	1495	1171	742	724	552	524	123	661	1016	1570	467	1592	470	350	1224	796	387	1675	1154	3266	1589	1659	2816	746	1665	1262	1006	1692	1241	1631	1998	1247	529	2048	1783	4541	2183	1628
SLC7A1_ENSG00000139514.7	2411	3748	740	757	867	3721	1767	6597	1397	1090	2029	654	2637	2489	359	1142	516	125	558	1124	338	728	16167	1075	529	2463	252	1049	3097	1156	2729	1039	2578	4713	983	1157	1713	4013	1218	1984	800	1376	790	388	5607	1618	2917	1880	2186
RP11-23J9.5_ENSG00000254876.1	314	133	106	134	224	335	331	93	508	152	367	314	233	343	272	90	245	11	437	177	124	123	171	70	95	3	179	15	89	365	144	203	227	248	221	631	42	102	135	361	587	486	151	89	12	503	270	223	324
CDH9_ENSG00000113100.5	4	0	0	1	0	1	3	1	0	3	4	1	2	0	0	0	2	2	0	7	0	2	0	7	0	0	1	0	2	0	1	0	0	1	0	0	0	0	4	0	0	1	0	0	1	0	6	2	0
SPHK1_ENSG00000176170.7	3615	4189	1219	9360	1619	4754	3461	413	8815	3223	2364	2142	1758	1928	191	1583	1856	51	1530	2700	2640	362	3353	864	1739	264	568	350	839	3595	7184	7618	3456	5474	13083	1426	1664	6430	4493	1847	2553	2718	2636	2952	3016	1503	4226	2825	3593
PCNXL2_ENSG00000135749.13	4624	3672	13366	8343	11514	2711	3493	2036	9016	3963	5310	5227	10322	4315	11108	5963	4206	1115	9583	15448	1206	5385	13777	758	5761	1551	3547	6366	4773	8659	7797	14339	7780	5158	5573	9577	4272	4576	6400	7659	13790	9518	8796	3691	3513	4937	3787	4382	7425
ITGA9_ENSG00000144668.7	644	662	333	744	346	172	429	140	653	308	2371	368	334	205	1157	163	106	15	86	129	132	58	365	78	87	76	699	33	281	334	1642	255	704	810	139	238	232	182	353	367	498	728	466	293	384	344	7193	736	658
TTLL4_ENSG00000135912.6	2470	2652	2801	3718	2426	7540	4187	3387	2948	3260	3033	2742	3401	3301	2897	3851	1459	232	3872	4423	3516	1319	1998	1501	1235	1687	612	870	2644	4017	2626	4883	2812	3726	2527	6097	4445	3349	4006	2877	4041	4144	3684	1180	3397	4638	2181	3352	3954
ENOX1-AS1_ENSG00000233821.1	31	5	15	64	26	15	22	8	23	4	30	30	13	5	2	23	9	1	20	29	17	5	12	33	9	6	49	0	3	19	34	98	23	14	6	14	3	6	6	25	25	33	15	14	5	21	36	26	12
RP11-5A11.1_ENSG00000255105.1	1	0	3	2	8	2	0	0	0	0	0	1	0	0	0	0	6	1	1	1	1	4	0	7	0	0	0	0	2	3	1	0	0	0	0	0	0	0	2	2	1	0	0	0	0	1	1	2	1
RP11-275O4.4_ENSG00000237193.1	0	0	0	0	0	0	0	0	0	0	0	0	0	0	0	0	0	0	0	0	0	0	0	0	0	0	0	0	0	0	0	0	0	0	0	0	0	0	0	0	0	0	0	0	0	0	0	0	0
RP11-678B3.1_ENSG00000232418.1	0	1	0	0	0	0	4	0	1	0	0	0	0	1	0	0	0	0	0	0	0	0	0	2	0	0	0	1	0	0	0	0	0	0	0	0	1	1	0	1	0	0	0	3	0	0	2	1	0
CLDND2_ENSG00000160318.1	24	30	59	44	64	74	100	60	69	30	16	30	54	23	90	68	46	7	5	73	34	29	26	6	7	53	17	32	92	67	27	41	17	18	19	37	20	56	52	102	31	20	29	5	47	35	30	55	49
STARD13-AS1_ENSG00000233226.1	36	36	18	48	23	42	53	10	82	83	64	23	14	4	63	17	29	1	17	15	54	18	18	8	12	17	126	9	25	28	20	42	27	34	46	35	9	15	36	26	32	60	21	48	12	38	97	78	29
GAPDHP69_ENSG00000223460.1	22	42	12	4	10	7	4	14	17	13	10	7	1	5	1	5	19	2	3	12	3	7	3	25	6	2	4	4	41	2	8	2	6	40	7	10	6	57	30	48	62	8	23	6	27	108	15	26	29
RP11-379I19.3_ENSG00000253879.1	1	0	1	0	0	0	2	1	0	2	4	1	1	0	2	0	0	1	5	1	0	2	2	11	4	0	0	1	2	1	2	2	3	3	2	1	0	0	1	2	0	2	1	2	1	3	3	0	4
RP11-338E21.2_ENSG00000225195.2	46	61	55	99	84	28	80	45	91	73	188	33	108	34	176	36	34	32	35	64	107	56	61	145	34	40	273	99	61	86	94	61	106	53	57	28	39	29	55	52	42	81	75	47	101	45	381	91	40
AC010615.1_ENSG00000213976.2	31	13	8	20	18	12	42	14	13	24	12	32	16	5	26	0	6	0	1	4	7	0	0	5	0	23	11	0	0	16	19	8	20	12	0	6	8	7	15	7	12	18	10	7	0	16	4	24	18
RNU7-27P_ENSG00000238750.1	0	0	0	0	0	0	0	0	0	0	0	0	0	0	0	0	0	0	0	0	0	0	0	0	0	0	0	0	0	0	0	0	0	0	0	0	0	0	0	0	0	0	0	0	0	0	0	0	0
CTC-261N6.3_ENSG00000248195.1	0	0	0	0	0	0	2	0	0	0	0	0	0	0	0	0	0	0	0	0	0	0	0	2	0	0	0	0	0	0	0	0	0	0	0	0	0	0	0	0	0	0	0	0	0	0	0	0	0
U6_ENSG00000202099.1	0	0	0	0	1	0	0	1	0	0	0	0	0	0	0	0	0	0	2	0	2	1	0	1	0	2	1	0	0	0	0	0	0	2	1	0	3	0	1	0	0	0	1	1	0	0	0	0	0
snoU13_ENSG00000238802.1	0	0	0	0	0	0	1	0	0	0	0	0	0	0	0	0	0	0	1	0	0	0	0	1	1	0	0	0	0	0	0	0	0	0	0	0	0	0	0	0	0	0	0	2	0	0	0	0	0
C3orf43_ENSG00000214097.4	0	2	0	0	2	0	3	0	6	0	0	2	0	1	0	0	1	1	5	0	2	2	0	16	3	3	13	0	0	0	0	4	1	4	7	2	2	0	3	2	0	2	0	0	0	1	0	0	0
KIAA0284_ENSG00000099814.8	14184	47379	14237	16948	14259	35358	30560	31142	5828	16846	19873	16922	13240	11293	24680	22181	8346	995	9990	20757	17241	11398	39898	13721	13794	17425	2347	11004	19745	26199	15310	9180	23359	36665	17381	31390	30223	42857	49099	15387	36180	49437	38390	7466	36859	18966	28275	24378	36289
RP11-89N17.4_ENSG00000236494.1	9	2	2	6	13	5	17	1	5	2	17	14	4	0	2	2	10	1	15	5	6	11	7	3	10	4	16	0	3	5	0	7	6	2	3	3	1	4	5	11	4	4	8	2	5	3	0	2	9
LL22NC03-63E9.3_ENSG00000220891.1	4	0	1	1	5	7	4	1	0	21	0	2	2	1	2	3	0	4	9	3	2	3	2	3	0	1	15	1	2	3	1	3	33	10	2	1	4	2	20	18	8	0	2	0	76	0	6	87	14
SIRPB1_ENSG00000101307.10	466	469	76	133	176	305	249	427	108	168	333	74	1443	311	53	82	19	16	28	221	43	48	504	303	56	42	451	25	84	223	1059	206	677	427	363	102	147	305	467	251	195	139	130	194	392	115	395	413	187
AC005076.5_ENSG00000224046.1	21	8	7	0	2	27	14	4	7	7	6	23	5	0	3	4	3	6	2	17	2	0	2	0	0	6	29	0	18	7	7	4	14	5	3	3	22	10	7	2	5	2	6	2	28	10	9	19	7
ZBTB16_ENSG00000109906.8	3942	337	927	352	2040	310	257	120	741	259	3982	813	773	137	417	830	1627	127	106	275	143	249	2208	36	255	151	364	216	572	2498	222	45	1033	5594	9280	720	255	224	894	607	1096	777	1790	2597	89	728	7340	863	963
RP11-308N19.5_ENSG00000228143.2	0	0	1	1	0	0	0	0	0	1	0	0	1	0	0	0	0	0	1	0	0	0	0	2	0	0	0	2	0	0	0	1	0	2	0	1	0	0	0	0	0	0	0	0	0	0	0	0	0
PRELID1_ENSG00000169230.5	4152	8097	2551	3652	3605	8402	6702	12079	4023	2388	2880	2091	5529	4877	1195	4200	1309	595	1276	5945	1816	1456	7305	3028	1187	6903	1471	1557	9764	2638	8069	6284	7580	9138	2995	953	6611	7238	5337	1754	1058	1869	2760	1438	7473	6666	3679	6473	6660
SERPINB10_ENSG00000242550.1	106	124	4	33	29	232	114	27	1	52	43	47	31	642	1	4	1	17	0	11	3	0	79	351	26	0	7	0	314	34	98	28	209	110	217	1	40	77	111	22	4	94	89	2	274	22	17	0	103
NHP2P1_ENSG00000105988.6	73	79	57	67	68	101	50	124	113	54	71	47	58	125	43	45	47	4	61	181	33	86	65	34	20	87	36	16	129	34	67	39	68	65	33	37	47	77	44	35	45	33	40	38	92	58	65	81	79
5S_rRNA_ENSG00000200527.1	15	32	8	10	11	10	10	45	0	11	17	3	13	47	6	7	1	2	1	2	6	3	39	13	3	7	1	22	11	14	32	6	11	40	3	7	21	15	17	7	5	6	27	1	42	10	5	14	13
AP000708.1_ENSG00000255537.1	12	9	3	14	5	16	9	1	21	15	20	7	6	16	7	5	2	2	10	8	3	4	7	21	1	2	7	1	8	6	15	14	15	8	10	2	9	18	8	5	6	6	3	2	5	3	33	15	9
MYL9_ENSG00000101335.5	8839	8257	3704	14552	4783	12415	8014	788	4696	8438	54459	6396	4280	3771	15856	6046	1807	337	2271	8933	4140	628	8332	2576	2203	1087	1968	392	2545	6545	29035	29798	9759	8722	13098	1989	6365	8227	7146	2857	7740	24711	10443	9920	3266	10219	226107	9119	9828
CCDC62_ENSG00000130783.9	88	22	25	30	51	34	59	21	36	40	42	73	25	8	50	21	19	7	48	64	19	25	29	17	22	30	37	5	29	33	13	28	27	31	87	26	16	25	28	34	25	30	17	30	39	13	14	58	26
F12_ENSG00000131187.5	1249	1834	1023	1265	608	1353	1406	2843	496	314	911	755	1341	2660	252	1560	573	102	1110	3965	662	494	1686	486	286	773	498	457	5336	471	1101	1427	1166	1405	386	494	1302	1088	1312	878	690	930	734	269	5711	1785	676	1422	1949
RP11-354M20.3_ENSG00000231104.1	81	42	93	57	67	27	36	53	78	77	76	35	112	69	312	59	37	32	24	45	64	141	47	15	23	73	110	89	78	53	95	82	85	42	68	19	91	39	32	25	31	26	50	32	37	23	76	35	63
RP5-945I17.2_ENSG00000254669.1	2	0	0	0	0	1	0	0	0	0	1	0	0	0	0	0	0	0	0	0	0	0	0	3	0	0	0	0	0	0	0	0	0	0	1	2	0	4	0	0	4	0	0	0	0	0	0	0	0
ZNF717_ENSG00000227124.4	465	338	280	278	400	282	550	460	424	307	500	843	382	438	251	232	178	18	138	199	268	33	120	241	208	28	133	70	511	360	426	489	279	498	147	406	576	475	266	358	379	163	289	183	205	476	399	482	534
EEF1A1P27_ENSG00000179460.5	1	0	0	0	0	1	0	0	0	0	0	0	0	0	0	0	0	0	0	0	2	0	0	6	0	0	0	0	0	1	0	2	1	0	0	0	1	1	0	0	0	1	0	1	0	0	0	0	0
Y_RNA_ENSG00000207131.1	0	0	0	0	0	0	0	0	0	0	0	0	0	0	0	0	0	0	0	0	0	0	0	2	0	0	0	0	0	0	0	0	0	0	0	0	0	0	0	0	0	0	0	0	0	0	0	0	0
AC011893.3_ENSG00000226806.1	8	12	2	5	7	4	6	5	6	6	0	3	2	0	4	0	0	2	0	2	7	5	2	5	6	5	1	0	0	0	16	10	2	2	2	0	1	2	2	6	0	8	0	0	0	3	0	4	0
PANX1_ENSG00000110218.4	719	1195	167	451	288	1055	554	455	807	311	741	289	882	1303	101	234	52	8	36	401	77	46	911	196	83	215	610	51	619	329	1782	548	1029	1098	958	152	979	1120	498	281	143	207	211	144	601	718	947	470	962
AD000090.2_ENSG00000236144.1	89	101	108	139	107	293	247	100	138	44	154	248	164	182	101	157	109	4	191	206	137	125	72	10	67	60	37	8	117	143	66	125	335	68	111	186	99	279	191	193	155	284	87	51	147	127	149	63	174
AC007679.1_ENSG00000213739.2	0	1	0	1	0	2	0	1	0	0	0	1	0	0	1	0	0	4	0	0	0	2	1	8	0	0	1	0	0	0	0	0	1	0	0	0	1	1	0	0	0	0	2	0	1	1	1	1	1
SPC25_ENSG00000152253.4	124	230	188	53	109	199	341	293	80	59	193	82	116	202	166	67	83	48	33	178	78	118	107	126	27	294	60	138	278	78	252	115	214	202	26	32	249	123	81	107	189	30	108	31	147	189	96	393	145
RP11-521J24.1_ENSG00000229246.1	3	0	4	4	0	7	0	1	5	5	1	10	3	0	6	0	4	0	0	0	0	0	0	6	0	1	0	2	0	4	0	0	0	0	0	0	0	0	1	6	0	6	1	11	0	1	0	0	0
TBK1_ENSG00000183735.5	1775	2088	1021	1295	1235	1047	1799	1382	1867	1469	1863	1648	1925	1604	863	931	333	79	974	934	715	618	1413	1678	528	737	1340	681	1536	1518	2212	1051	1764	1830	932	924	1089	2147	1491	1065	748	1298	907	605	1041	1667	1429	1755	1296
MIA3_ENSG00000154305.11	4176	4510	2923	2456	4128	4329	4399	7697	4472	4305	5808	3241	4224	6723	4267	2035	2456	1107	1848	3566	4359	3904	12838	787	3648	4126	3074	38757	7040	3219	8674	6769	7912	7501	2272	3210	6425	4815	4010	3793	2701	4515	4585	1381	4723	5875	4780	3583	5158
RP1-43O17.1_ENSG00000229713.1	0	0	0	0	0	0	0	0	2	0	0	0	0	0	0	0	0	0	0	0	0	0	0	3	0	0	0	0	0	0	0	0	0	0	0	0	0	0	0	0	0	0	0	0	0	0	0	0	0
RP11-358M14.2_ENSG00000228322.1	35	5	11	8	23	10	10	12	5	9	24	5	9	1	12	5	6	1	11	6	14	2	1	8	5	0	0	2	10	22	16	10	3	31	16	14	4	8	5	4	8	2	11	3	9	5	11	13	4
OR10G8_ENSG00000234560.3	0	0	0	0	0	0	0	0	0	0	0	0	0	0	2	0	0	0	4	0	0	0	0	3	0	0	2	0	0	0	0	0	0	3	0	0	0	0	0	0	1	0	0	0	0	0	0	0	0
CENPC1P1_ENSG00000226982.4	101	42	107	58	75	81	85	107	84	85	90	93	45	38	67	17	50	35	82	46	91	107	89	35	53	45	66	77	121	36	113	85	51	65	76	47	45	41	33	58	12	50	82	33	70	68	32	46	42
TOX2_ENSG00000124191.11	233	298	159	165	318	562	302	203	865	123	217	145	342	15	53	79	60	13	19	120	73	42	201	7	104	49	162	20	139	161	283	106	501	340	1620	129	107	118	288	387	102	149	325	168	40	129	623	787	207
RP11-553P9.1_ENSG00000250144.1	510	1197	160	470	460	344	393	595	327	178	799	184	502	800	97	86	92	70	62	51	30	45	425	514	74	236	243	273	335	196	875	181	810	1017	492	61	337	489	257	333	153	160	323	364	791	403	824	476	445
C6orf108_ENSG00000112667.8	1747	4628	1080	2170	1477	2142	2039	3862	1857	836	1419	1067	1685	2370	513	1350	910	135	682	2254	1032	536	2643	365	587	2218	468	244	2865	989	3177	3097	3546	2187	526	405	3357	1827	1399	947	647	782	1151	488	2858	1994	1547	1939	3277
NBPF15_ENSG00000243452.2	6122	6615	6142	8387	5568	6641	5056	5991	9774	7114	7181	6341	6555	8259	4296	7153	4183	816	10150	9386	7438	4295	7725	1971	5218	3685	7332	3336	3385	11690	7119	14831	7332	6127	9125	8955	7187	5407	6524	9279	9672	10526	5971	4785	5152	7913	7553	6275	6878
XXbac-BPG254F23.7_ENSG00000232080.1	108	57	12	6	318	63	36	18	138	27	90	21	225	12	9	27	0	0	0	93	9	0	15	22	36	2	12	0	0	0	225	0	126	90	24	0	90	63	150	192	0	24	42	57	9	42	6	150	18
RP11-14C22.3_ENSG00000230998.1	2	4	0	1	0	0	2	0	3	0	0	0	0	0	0	0	0	0	0	0	0	0	5	4	0	0	0	0	0	2	0	0	0	0	1	0	0	1	0	0	0	0	2	0	0	0	0	0	0
RP11-443P15.2_ENSG00000171658.4	57	50	24	45	76	364	77	16	233	61	90	108	85	171	354	29	17	4	47	112	89	117	13	48	33	80	19	56	56	473	16	126	59	66	85	111	497	1057	87	66	340	178	41	5	59	36	72	105	150
FIP1L1_ENSG00000145216.11	2275	4349	1294	2132	2162	3244	2478	2074	3973	1616	2764	1716	2354	2178	1509	1479	751	626	1156	2521	1199	814	2436	2130	673	1048	1810	1654	3201	1602	4929	1920	2441	3064	2068	1227	1880	2161	1942	1362	905	1326	1902	811	2616	2482	2491	2368	2113
SHBG_ENSG00000129214.8	10	15	5	3	12	11	16	4	9	7	13	3	9	0	5	0	4	2	6	21	2	4	4	23	4	15	42	7	3	15	17	10	15	18	6	12	10	12	9	13	16	6	9	8	5	13	37	17	14
CACNA2D3_ENSG00000157445.9	86	30	81	57	264	161	68	0	175	26	262	24	147	7	155	19	14	5	295	71	18	23	60	69	61	2	4052	0	31	138	148	71	74	14	84	21	8	73	129	139	38	67	65	102	8	33	330	283	38
FAM84A_ENSG00000162981.11	810	545	532	888	1364	3866	595	5184	217	213	643	338	934	70	847	145	429	81	1320	865	867	451	415	340	104	2667	1019	551	702	228	2665	629	854	1384	1584	605	120	281	309	534	675	266	1312	219	3064	550	1374	1284	709
RP11-277P12.10_ENSG00000256288.1	29	7	10	9	10	9	13	18	3	35	11	35	7	14	6	17	53	3	8	52	13	7	12	10	9	6	7	2	10	12	4	7	4	43	9	10	3	9	9	8	20	8	3	4	9	6	7	19	14
ZFHX4_ENSG00000091656.9	573	722	241	1845	217	429	574	42	122	903	1419	838	198	32	161	174	197	41	146	911	280	15	331	192	57	30	102	12	221	409	2002	2120	803	440	483	188	142	618	499	302	323	1044	318	579	105	519	2354	458	498
DEFB1_ENSG00000164825.3	351	122	32	110	117	179	303	13	14	82	303	145	19	11	19	175	182	6	40	249	0	11	274	19	19	4	21	21	258	339	169	3845	7	378	8	102	183	230	195	3	51	20	49	18	35	283	114	82	217
EPHA5_ENSG00000145242.9	82	5	5	0	2	2	4	0	3	125	13	5	2	0	4	4	15	6	0	1	2	4	4	53	0	2	0	3	9	16	18	8	22	46	6	0	0	6	4	18	5	1	38	53	4	4	25	31	12
EMR2_ENSG00000127507.11	684	2353	566	1230	710	1046	1240	1814	4490	1004	560	716	1620	966	447	726	534	85	1319	884	731	443	821	295	874	794	421	178	881	1089	941	616	1569	939	1019	662	597	688	1197	1461	555	1265	1115	322	1281	1165	825	1481	1280
MIR941-3_ENSG00000215926.1	9	11	10	7	10	12	7	12	11	16	11	13	20	24	7	13	7	2	22	20	26	39	23	5	7	8	16	28	11	47	14	13	17	10	8	11	17	13	15	7	2	14	11	6	6	12	22	7	12
AK2P2_ENSG00000242272.1	18	16	15	15	14	33	8	23	23	6	17	18	14	11	15	10	4	7	12	14	5	17	9	3	35	30	14	9	8	31	20	14	18	14	13	9	6	14	10	14	14	10	12	8	16	14	4	23	9
AL450311.8_ENSG00000243936.1	0	0	0	0	0	0	1	0	0	0	0	0	0	0	0	0	0	0	0	0	0	0	0	0	0	0	0	0	0	0	0	0	0	0	0	0	0	0	0	0	2	0	0	0	0	0	0	0	0
RP11-436I24.1_ENSG00000235740.1	113	144	261	55	215	42	64	190	105	79	206	46	334	87	74	89	48	14	61	62	158	144	195	45	97	207	116	65	69	267	78	58	217	107	22	134	239	39	182	427	99	586	165	9	181	129	95	101	185
SLC12A8_ENSG00000221955.6	1072	1861	554	1234	770	1454	1085	1464	792	1167	1499	1164	1357	3306	1591	824	486	85	296	725	1311	219	1635	435	388	607	190	716	1367	886	5101	2064	1519	1492	948	509	1189	2428	969	1671	1778	837	1195	476	2433	1204	1487	1325	1495
RP11-70C1.3_ENSG00000235288.1	0	6	3	2	1	9	5	3	0	2	4	2	0	2	2	0	2	0	0	1	3	0	5	2	0	0	0	0	2	0	3	0	2	4	0	3	6	2	3	1	0	2	2	0	12	5	1	1	7
OR7C1_ENSG00000127530.2	2	0	0	1	0	0	2	0	2	0	0	0	0	0	1	0	0	0	2	0	0	0	0	10	0	0	0	0	0	0	0	0	0	0	7	3	0	0	0	4	1	0	1	0	0	0	0	1	0
ITGB1BP1_ENSG00000119185.8	4125	8030	2253	3814	3058	5428	3636	5073	6569	4992	3071	4766	4948	7781	1592	3002	786	312	2648	3150	1659	1166	5717	2018	906	1471	1481	1047	3352	3113	5395	4058	4541	4438	3393	2901	6634	3613	5566	2044	2509	3338	2922	2037	6049	6655	3334	3650	5108
RP11-478B9.2_ENSG00000257572.1	22	0	6	3	8	1	2	0	0	0	2	2	2	0	1	2	0	3	2	5	1	19	1	17	2	0	2	0	0	3	1	0	7	0	5	2	0	0	0	2	13	4	0	7	0	0	0	5	0
GPHN_ENSG00000171723.11	866	1645	594	665	706	802	986	1154	581	497	797	510	472	952	1188	446	318	45	466	604	291	273	436	288	181	637	633	215	1376	586	1451	370	696	1986	245	517	1073	1088	876	540	534	905	628	389	2068	1208	1134	988	841
IGKV2-18_ENSG00000254157.1	0	0	0	20	20	0	0	30	38	0	0	14	6	0	0	0	3	10	0	1	0	0	4	7	0	4	0	0	4	0	19	0	4	6	0	0	38	0	0	1	0	0	6	1	18	4	1	116	138
C1orf185_ENSG00000204006.4	0	0	0	0	0	0	0	0	2	0	0	0	0	1	5	0	0	0	1	0	0	0	0	10	0	0	0	0	0	1	0	0	2	1	0	3	0	0	0	0	0	2	0	3	0	0	1	1	0
U1_ENSG00000202000.1	0	0	0	0	0	0	2	0	0	0	0	3	0	0	0	0	0	0	2	1	0	0	0	6	0	0	0	0	0	0	0	0	0	0	0	1	0	0	0	1	0	0	0	0	0	0	1	1	0
AP000619.5_ENSG00000225678.2	2	9	9	0	0	9	17	4	8	0	6	8	22	32	6	1	0	3	23	3	0	4	15	15	0	1	0	0	14	2	1	0	24	2	9	13	0	35	8	1	1	0	1	1	1	36	1	4	10
snoU13_ENSG00000238676.1	4	0	2	0	0	1	2	0	0	0	3	0	1	0	0	2	0	0	0	0	0	0	2	3	0	1	0	0	0	0	0	0	0	0	1	0	0	0	0	0	0	0	2	0	0	0	0	0	0
AC090519.3_ENSG00000203572.3	130	157	48	98	76	93	98	106	64	67	254	82	179	133	57	55	29	9	44	31	6	100	177	108	19	16	55	63	137	22	486	108	134	281	76	49	151	179	118	67	59	52	88	76	127	55	240	110	106
MIR320A_ENSG00000208037.1	0	0	0	0	0	0	0	0	1	1	1	0	0	0	1	0	1	0	1	0	0	1	0	0	1	1	0	0	0	0	0	0	1	0	0	0	0	1	0	0	2	0	0	0	0	0	0	0	0
NDEL1_ENSG00000166579.10	1538	1961	695	1424	1240	1562	2658	2138	1240	1892	1458	950	1463	1899	434	707	510	87	1029	1132	521	581	1759	1119	546	481	909	837	1193	1471	2887	1601	1697	2321	1424	988	1982	1687	1370	1158	1126	1109	1333	738	1410	1465	2104	1458	1298
RP11-23D24.2_ENSG00000240456.2	1	2	4	2	3	5	3	0	7	1	4	0	5	1	15	2	1	1	11	4	2	0	2	11	2	1	0	5	0	2	0	0	0	0	2	2	0	9	5	2	5	0	1	3	2	0	2	4	1
AL592207.1_ENSG00000239606.1	0	6	2	19	3	0	9	6	1	2	5	8	6	4	7	5	2	1	14	17	0	0	4	3	4	0	17	0	0	9	4	21	3	17	15	4	4	2	10	25	32	30	2	2	3	19	2	3	14
IRAK1BP1_ENSG00000146243.8	151	58	70	58	108	49	71	56	85	38	176	69	84	102	46	20	70	6	19	71	34	26	46	29	18	56	70	25	88	70	144	129	195	67	38	44	25	96	53	70	111	80	66	48	13	29	119	117	118
ZNF682_ENSG00000197124.5	191	132	73	92	106	139	474	336	552	91	144	187	43	58	74	37	117	32	29	192	322	36	32	53	37	10	350	7	39	315	58	219	181	108	41	87	114	32	62	199	310	106	69	90	9	194	206	152	254
AL160287.1_ENSG00000246873.1	69	11	14	16	131	23	26	174	176	35	57	10	63	2	60	29	14	0	10	55	35	10	11	11	44	7	46	2	4	98	37	21	133	34	3	20	14	29	60	238	26	20	34	35	5	18	28	95	35
AC098817.2_ENSG00000239611.1	0	0	0	0	0	1	0	0	0	0	0	0	0	0	0	0	0	0	0	0	0	0	0	0	0	0	0	0	0	0	0	0	0	0	0	0	0	0	0	0	0	0	0	0	0	0	0	0	0
ETV3_ENSG00000117036.7	702	1613	337	943	651	2520	917	923	581	637	1363	499	1264	1082	593	363	190	120	260	582	334	292	1363	1284	327	351	1292	1149	1070	380	2786	1264	1644	1394	784	482	1511	1093	844	663	545	1105	678	416	1367	1177	1271	801	975
RP11-744J10.2_ENSG00000253216.1	0	0	0	0	0	0	6	0	0	0	0	1	1	1	0	0	0	0	5	0	2	0	1	3	0	5	0	0	0	4	0	0	0	1	2	0	0	3	0	0	0	0	0	0	0	0	0	0	0
SLC35C1_ENSG00000181830.5	3184	10233	2669	2215	2581	6282	10275	9016	2124	1817	4660	2541	12040	2638	2102	2313	619	266	712	3317	1836	538	13002	2509	689	3128	1319	1132	8205	2776	12904	5891	6190	7263	1926	2246	8207	7617	5419	2064	1924	2962	5413	1502	9279	11120	5496	3133	6244
GRAMD1B_ENSG00000023171.9	1617	4358	2667	947	3008	149	825	9315	837	2469	2554	416	4582	50	2043	3513	650	60	115	197	1361	1740	13440	110	822	417	2221	2561	3709	2822	4578	1697	3112	3122	155	936	7736	5692	7170	3181	3716	2855	2195	671	748	3700	1210	1735	3606
AL359836.1_ENSG00000222197.1	18	11	14	32	19	7	12	28	10	59	19	16	25	24	57	13	16	12	35	22	38	23	11	5	9	28	5	14	29	29	20	39	24	24	7	12	39	9	16	9	3	17	19	10	19	17	14	31	14
RP11-909M7.2_ENSG00000258861.1	0	0	0	0	0	0	1	0	0	0	1	2	1	0	0	0	0	0	1	0	0	11	1	4	0	0	0	0	0	0	0	0	0	0	0	0	0	0	0	0	0	0	1	0	0	2	1	0	0
RNF24_ENSG00000101236.11	908	1958	762	2311	1250	3147	1353	122	3168	1010	970	995	566	1710	1043	484	331	100	1454	1056	264	718	1036	198	266	506	1490	308	873	756	2258	924	863	1584	2319	538	634	1454	1107	598	568	350	529	417	649	1098	1215	718	1234
SNORD115-44_ENSG00000202261.1	0	0	0	0	0	0	0	0	1	0	3	0	0	0	0	0	1	0	0	0	0	0	0	0	0	0	0	0	1	1	0	0	0	0	0	0	0	0	0	7	0	0	4	0	0	6	1	0	0
CHID1_ENSG00000177830.13	3501	7452	1506	2672	2368	3508	5354	5836	4977	1544	3887	2621	3493	4929	991	1906	1884	301	1160	9007	843	1885	7920	1427	731	3782	2476	590	6742	2457	6972	3297	4045	4974	3345	1448	4085	6790	4157	1857	1848	1662	2159	908	6277	4644	4223	3415	3464
C16orf57_ENSG00000103005.4	2879	4985	982	2389	1552	7431	4063	3135	3271	1304	4066	1400	4963	3464	1175	1855	786	253	766	4411	1387	801	5065	3055	728	2375	1162	1405	3465	2041	4775	1898	4264	3795	3074	1681	4283	6235	4118	2751	1655	2319	1988	1504	2906	5131	4200	2386	2619
KIAA0247_ENSG00000100647.7	4398	8929	1806	2837	2316	5817	4640	2652	2529	2364	5508	2472	3420	1792	657	2697	592	99	1100	1480	629	510	4108	439	579	987	1539	119	3265	3713	9119	2270	5143	6958	2241	2491	3091	6144	4143	3039	2895	2725	2383	954	2844	4274	6345	2647	4920
OVGP1_ENSG00000085465.10	225	160	345	372	392	106	254	246	500	328	359	474	320	60	253	369	171	34	493	525	133	260	153	165	261	132	192	46	472	641	377	85	345	153	528	269	310	166	223	837	710	625	328	278	422	237	156	310	411
CCNB1_ENSG00000134057.10	562	2569	206	290	494	2226	2513	2471	367	439	339	425	484	1390	135	615	66	44	368	985	183	279	368	756	98	1858	347	148	2037	337	1178	715	885	1105	263	203	1297	1396	503	444	166	234	307	103	1840	2592	244	1363	1123
AC140061.10_ENSG00000203430.1	0	0	2	4	3	0	2	0	2	2	0	2	2	0	1	0	0	0	0	3	0	2	0	0	0	0	2	2	0	2	1	3	0	0	3	2	0	0	0	0	0	0	0	0	0	0	1	3	0
TMED9_ENSG00000184840.7	7801	18309	2485	5768	5856	15093	13829	13611	12702	3787	7179	4684	9891	19011	1239	5858	1632	332	1736	13258	1301	1452	13561	1080	1698	4976	4370	1149	17671	3276	17991	8795	11097	13307	10172	1670	10580	15618	7177	3282	1335	2972	3262	652	11602	12410	7086	6937	11493
RP11-804L24.1_ENSG00000259096.1	46	146	24	27	30	29	54	22	37	17	62	43	32	49	39	18	14	10	16	26	17	11	59	39	7	9	14	22	46	44	121	11	63	134	29	62	70	83	43	60	40	56	47	31	27	33	80	49	55
RP11-30K9.1_ENSG00000242747.1	178	188	78	75	145	174	117	168	138	93	141	89	108	173	55	43	35	13	72	63	48	41	173	196	43	67	65	29	122	64	254	204	213	175	94	20	102	213	152	114	63	31	77	63	146	92	175	131	119
RP11-255G12.1_ENSG00000258479.1	14	2	2	4	6	6	20	2	5	8	9	8	2	8	2	1	1	4	16	9	0	3	3	8	1	2	4	0	0	11	1	0	1	0	6	5	4	14	8	15	0	2	0	2	4	1	4	1	4
RP11-95K23.2_ENSG00000225707.1	0	1	0	0	0	0	0	0	0	0	0	0	0	0	0	0	0	0	0	0	0	0	0	3	0	0	0	0	0	0	0	0	0	1	0	0	0	0	0	0	0	0	0	0	0	0	0	0	0
GIMAP7_ENSG00000179144.4	530	182	218	77	720	87	169	349	1208	248	175	165	200	28	194	72	122	72	36	128	121	155	176	37	208	42	629	35	188	171	205	121	791	331	56	28	89	115	347	676	60	76	192	455	62	129	296	1094	215
RP11-127B16.1_ENSG00000220908.2	0	0	0	0	15	0	0	1	0	0	3	0	0	0	0	0	0	0	0	0	0	2	0	0	0	0	0	0	0	0	0	0	0	0	0	2	0	0	0	13	0	0	0	0	0	0	0	0	0
RP11-252I14.1_ENSG00000229721.3	14	11	49	17	75	29	21	41	13	25	13	30	20	16	49	24	37	15	72	27	22	181	8	5	23	36	53	37	10	38	7	42	15	7	17	26	4	6	13	34	19	44	16	30	0	9	23	13	8
VPS29_ENSG00000111237.12	2569	3465	2964	2344	3584	2318	2198	2790	3866	2121	2519	2795	1938	1643	1645	2910	752	143	2162	3093	2643	356	2784	701	952	1639	1437	473	3053	2571	2626	1891	3236	2235	1266	1486	1936	3043	2841	1934	1431	2890	1675	827	2339	1687	2449	3319	2454
HHIPL2_ENSG00000143512.8	4	4	17	23	6	6	26	3	25	22	26	28	17	19	28	6	25	8	21	26	53	8	70	39	14	21	17	61	8	31	17	15	19	12	18	24	43	60	6	33	9	33	18	26	6	12	5	20	22
C1orf201_ENSG00000001460.12	665	566	396	419	256	809	670	392	538	264	885	577	808	679	528	265	267	69	275	1801	330	423	757	219	103	441	270	226	1523	559	780	433	693	933	815	533	662	895	711	364	637	382	532	206	677	1192	570	525	774
RP13-644M16.3_ENSG00000250100.1	0	0	0	0	0	0	0	1	0	0	0	0	0	0	0	0	0	0	0	0	0	0	7	4	0	0	0	0	0	1	0	8	0	0	0	0	10	0	1	0	0	0	0	0	0	0	0	1	0
5S_rRNA_ENSG00000252002.1	5	3	1	1	2	18	4	8	6	0	2	7	1	0	0	2	2	0	21	1	2	0	0	0	0	0	0	0	0	0	0	1	5	0	22	1	0	11	1	2	0	2	2	3	0	0	1	1	1
GRIK1_ENSG00000171189.11	107	51	174	114	100	141	60	70	172	328	132	89	83	20	117	160	72	18	73	167	160	38	40	37	87	27	36	18	52	211	68	186	166	61	111	108	55	51	102	99	94	102	52	104	21	92	38	86	53
ARF3_ENSG00000134287.4	17197	20286	5064	7324	8269	11723	11709	8990	10501	4178	13135	5609	19290	8509	2388	8303	2558	667	1881	15889	1183	936	29877	9686	1726	5723	6878	4116	15122	5210	22190	8402	14206	23793	5909	3311	10929	20228	9120	6577	3462	5473	7768	2774	12157	15794	15611	12971	14902
RP11-867G23.3_ENSG00000245156.1	951	1891	485	806	614	1260	830	1289	706	550	1240	501	1349	1564	542	579	539	142	645	1229	426	327	2118	1227	228	497	378	636	1406	549	2277	504	1335	1526	637	344	1249	1660	900	499	318	416	759	410	1109	760	1397	936	1054
Y_RNA_ENSG00000199715.1	2	0	1	3	4	1	1	0	0	0	4	4	2	1	5	0	4	0	3	0	0	5	0	0	2	1	0	1	1	1	2	1	4	0	0	0	2	0	1	0	1	1	7	0	2	1	1	1	1
CTB-47B11.1_ENSG00000253155.1	0	0	0	0	2	1	1	0	0	0	0	0	0	0	0	2	0	0	1	4	0	2	0	15	0	0	0	0	0	0	0	1	0	0	0	2	0	0	0	0	1	3	0	0	0	0	2	1	0
RP11-231I13.2_ENSG00000242120.1	0	0	0	0	0	1	0	0	0	0	0	0	0	0	0	0	0	0	0	0	0	0	0	1	0	0	0	0	0	0	0	0	0	0	0	0	0	0	0	0	0	0	0	0	0	0	0	0	0
RBM15_ENSG00000162775.9	340	463	252	321	333	301	524	811	491	444	595	361	519	437	318	187	126	54	240	412	218	352	437	273	131	253	185	519	386	225	849	290	459	630	405	179	979	780	409	275	371	360	368	176	977	465	613	639	527
RP11-70P17.1_ENSG00000225643.1	16	10	30	7	21	60	19	14	84	33	40	11	48	6	9	15	12	3	17	16	21	8	11	3	6	33	9	1	10	34	15	12	22	8	40	9	7	6	36	25	26	15	5	5	5	7	20	13	14
RP11-133N21.7_ENSG00000257243.1	38	41	44	24	59	52	72	43	149	25	38	111	81	20	116	45	42	2	164	56	51	60	31	29	58	46	114	7	23	121	29	76	28	27	27	53	19	69	48	92	86	163	45	38	19	32	31	28	48
IFNWP15_ENSG00000232281.1	0	0	0	0	0	0	0	0	0	0	0	0	0	0	1	0	0	0	0	0	0	0	0	0	0	0	0	0	0	0	0	0	0	0	0	0	0	0	0	0	0	0	0	0	0	0	0	0	0
RP11-49K4.1_ENSG00000255679.1	0	0	0	1	0	3	0	0	0	0	0	0	0	0	0	1	0	0	14	2	0	0	0	2	0	0	1	0	0	0	0	0	3	0	0	1	0	2	0	0	0	1	0	1	0	0	0	0	0
NAP1L1P3_ENSG00000213371.4	14	18	9	17	19	12	17	8	19	16	19	20	13	11	3	10	6	2	11	23	3	1	17	6	3	11	14	6	34	13	35	15	23	18	23	3	5	29	18	9	6	13	14	7	27	22	17	16	18
WFS1_ENSG00000109501.8	2777	5638	1862	3060	2290	4692	1227	3230	1861	1267	7394	1720	4306	5515	7596	4695	2309	140	784	3422	1394	1180	5038	674	1138	1750	1713	2528	7120	928	12578	1557	7173	4557	2011	2863	2682	3068	2953	3125	5713	6002	7905	1064	5905	9348	19389	3887	9620
EFHC1_ENSG00000096093.9	2794	2238	2132	3096	1903	1958	1733	326	5707	1895	2887	5206	1570	2030	2487	1000	1379	86	1664	4764	2022	682	2168	177	743	1113	1725	576	1383	2873	1586	1665	1652	2018	1459	3171	4356	2020	2296	2412	3755	2485	2467	1258	1188	2448	2127	2321	2092
SEC61A2_ENSG00000065665.15	556	723	431	530	630	631	802	688	944	408	814	494	816	733	248	396	239	46	377	491	447	303	630	292	334	599	388	136	565	901	477	692	1011	393	272	677	561	484	792	836	815	536	351	187	508	655	670	716	657
RP11-619L12.3_ENSG00000253244.1	30	0	0	0	0	1	0	0	0	0	2	0	0	0	0	0	1	0	0	0	0	0	6	0	0	0	2	0	2	0	8	2	3	6	0	0	0	0	0	4	0	4	2	2	0	0	20	8	0
RP11-338C15.5_ENSG00000235862.2	6	2	2	15	5	0	0	4	2	14	0	2	1	0	2	2	0	0	2	4	3	0	0	4	6	1	0	11	0	7	0	6	5	2	3	11	0	3	2	0	17	8	6	0	10	9	5	8	6
RPS3AP30_ENSG00000228744.1	20	15	35	33	49	10	3	63	20	26	9	7	14	12	69	19	17	6	62	32	49	10	7	12	16	6	10	6	47	38	7	41	9	10	7	31	8	6	5	7	12	9	18	13	8	14	6	13	17
7SK_ENSG00000200131.1	0	0	0	0	0	0	1	0	0	0	0	0	0	0	0	0	0	0	1	0	0	0	0	5	0	0	0	0	0	0	0	0	0	0	0	3	0	0	0	0	0	0	0	0	0	0	0	0	0
RP1-151F17.1_ENSG00000229931.1	49	30	46	54	62	49	63	44	51	65	95	52	38	67	81	34	32	10	34	47	75	36	51	12	26	41	15	10	20	77	50	30	83	41	38	48	69	77	61	33	33	65	38	29	29	19	81	45	76
FOXJ2_ENSG00000065970.4	1566	2819	718	1274	1613	2944	1641	1305	1123	1116	2022	648	1182	1289	384	948	452	89	297	1340	360	347	1721	908	472	847	884	371	1938	969	2748	1020	1759	2503	1733	925	1927	1979	2022	1544	1661	1666	1550	623	2197	1925	2579	1211	2018
SNORD85_ENSG00000200181.1	17	55	13	17	13	22	20	28	17	19	56	7	22	23	8	9	7	1	4	14	4	6	29	23	4	6	10	29	22	21	48	18	40	75	24	12	28	35	14	21	15	29	20	13	49	43	48	25	22
SCNN1B_ENSG00000168447.5	82	4	13	11	64	161	39	2	7	6	29	26	49	119	8	121	21	4	119	19	3	55	798	19	16	0	8	103	20	34	30	1	21	116	4273	33	202	39	52	49	22	14	31	1	6	64	94	27	528
RPS20P33_ENSG00000242085.1	216	301	177	342	184	300	294	285	221	303	273	330	127	206	278	277	211	43	503	231	286	244	254	65	116	177	188	129	216	377	264	135	288	222	292	413	186	229	367	202	269	310	322	146	278	252	263	241	269
HMGN1P20_ENSG00000239539.1	1	0	1	1	0	0	0	2	0	0	1	0	0	0	0	1	0	1	0	0	0	0	0	1	0	22	0	0	0	0	0	0	0	0	0	0	0	0	1	2	0	0	0	0	1	0	3	0	0
FXYD5_ENSG00000089327.8	7103	36881	7316	9486	6450	10727	7077	9203	8767	8689	5217	10765	14093	23119	1284	15421	2922	2247	2657	19254	5215	1180	17904	3224	2843	2101	2029	3680	28546	3161	14272	7875	54063	5522	29029	6563	13882	11620	22099	3422	2749	2530	5860	1560	23171	16938	3519	8706	14318
XX-2136C48.7_ENSG00000226880.1	14	2	10	8	11	5	5	0	4	10	7	9	5	4	10	8	4	0	2	10	11	5	5	3	7	3	3	1	11	5	3	12	4	11	4	20	2	8	3	9	13	16	9	4	4	4	8	7	8
ANGPT4_ENSG00000101280.6	31	21	5	11	9	11	9	1	25	4	3	4	32	5	5	2	1	3	9	10	7	0	24	10	7	1	11	0	5	0	26	3	29	11	17	2	1	48	27	19	3	12	8	40	6	25	3	18	12
RAB27B_ENSG00000041353.3	478	2355	459	354	721	666	716	3372	298	353	529	456	1432	5235	210	449	44	150	95	474	174	116	1738	2548	128	4	67	1132	2494	472	2254	630	529	1139	197	226	2684	993	683	203	428	348	1074	77	1643	2101	307	1222	2137
DEFA6_ENSG00000164822.4	39	1	3	0	2	0	0	2	20	0	0	0	0	0	77	0	3	0	0	3	0	5	1	33	0	0	31	17	0	3	0	2	1	1	2	0	1	0	0	0	0	0	1	0	0	2	2	0	5
C8orf38_ENSG00000156170.7	532	550	367	197	489	642	694	512	423	277	610	438	464	623	373	375	175	34	362	460	631	364	367	355	132	367	260	87	561	520	414	607	522	388	332	319	210	573	337	527	401	661	242	187	410	293	474	632	507
CNR2_ENSG00000188822.6	19	5	8	24	477	3	26	16	16	75	12	8	17	5	12	18	12	9	10	17	13	7	14	42	353	14	63	4	33	35	10	19	340	14	9	8	14	9	17	827	4	11	14	219	5	15	7	71	21
CAMK2A_ENSG00000070808.11	336	83	40	81	46	207	54	11	28	112	101	69	36	7	32	221	44	8	72	31	150	24	40	36	102	32	11	25	15	71	73	26	83	91	346	34	13	94	129	66	155	257	51	192	25	18	227	77	126
Y_RNA_ENSG00000199716.1	0	0	0	1	1	0	2	0	1	0	2	2	3	0	1	0	1	0	1	7	1	1	1	1	1	0	2	0	3	2	0	2	1	0	1	0	1	1	1	2	2	0	0	3	1	1	0	0	0
AC006499.1_ENSG00000251338.1	0	0	0	0	0	0	0	0	0	0	0	0	0	0	0	0	0	0	0	0	0	0	0	2	0	0	1	0	0	0	0	0	0	0	0	0	0	0	0	0	0	0	0	0	0	0	0	0	0
PRAMEL_ENSG00000197549.5	0	0	0	0	49	0	6	1	2	2	0	0	4	0	0	14	2	3	1	0	5	1	2	17	41	0	2	0	0	0	0	0	32	22	34	2	0	6	2	79	0	0	4	82	1	0	0	12	3
DAPL1_ENSG00000163331.6	89	29	66	57	36	68	46	41	18	77	72	65	66	39	48	32	79	15	226	62	93	24	22	51	26	38	43	39	90	59	40	39	71	82	57	43	85	85	23	41	42	21	33	22	48	80	47	77	100
AC023425.2_ENSG00000241205.1	1	2	2	0	2	3	2	0	7	1	4	2	1	2	5	1	0	0	1	0	3	29	1	1	2	8	18	3	3	2	1	1	1	4	1	0	0	2	1	2	0	1	2	0	4	1	2	3	3
GIMAP5_ENSG00000196329.5	1133	321	410	297	1493	195	392	561	2541	564	467	196	377	113	286	184	242	63	98	286	255	160	458	134	453	92	900	26	245	597	365	116	1559	1015	80	146	210	246	824	3181	508	430	554	891	128	231	987	2218	371
NAGLU_ENSG00000108784.3	2928	8013	1201	1901	3323	1784	2801	2087	2388	1290	3778	2557	2847	6554	1109	1157	1438	114	1013	1988	1795	1263	6463	499	1016	1042	1574	524	2138	2049	7431	1989	4538	5752	1269	1224	2668	4900	2063	2378	2611	2268	2603	1634	3821	2572	4159	2631	2722
OBFC1_ENSG00000107960.6	1159	3156	479	1232	1072	1032	1443	1449	788	674	1112	438	1041	1885	312	408	201	98	170	1079	122	249	2161	838	137	814	533	655	3154	634	1793	777	1484	1623	1629	250	3144	2596	1889	489	388	504	925	382	2033	1877	1300	1791	2313
GLE1_ENSG00000119392.10	1198	1874	490	1216	973	2232	3029	1871	1291	818	1588	769	1738	1559	1318	1023	468	216	391	2342	738	1292	1609	1160	494	736	1283	953	1695	1407	1999	1349	2162	1494	1303	1438	1190	2480	1048	1173	1376	1695	1089	843	1745	2946	1403	1593	1441
ALDH8A1_ENSG00000118514.9	69	49	109	134	122	27	30	100	42	135	122	81	78	31	52	58	27	4	72	66	35	144	24	7	33	32	129	16	8	212	38	112	23	40	114	13	5	24	63	117	180	113	27	104	15	8	111	77	43
RP11-628J14.2_ENSG00000243195.1	1	0	0	0	0	0	0	0	0	0	0	0	0	0	0	0	0	0	0	0	0	0	0	2	0	0	0	0	0	0	0	0	0	0	0	0	0	0	0	0	0	0	0	0	0	0	0	0	0
MTRR_ENSG00000124275.10	906	1377	442	893	862	1006	913	736	1187	625	1535	760	884	798	489	443	260	77	140	277	326	253	605	644	223	430	458	641	748	899	1510	566	1163	1103	625	544	434	1158	617	899	1031	864	602	328	527	607	1537	1274	904
RPL13P2_ENSG00000213820.3	23	53	17	51	43	88	64	71	44	34	53	28	44	41	17	21	15	4	10	64	20	9	52	23	6	42	18	3	81	25	70	62	94	42	51	8	74	94	26	17	14	14	22	15	65	27	30	40	43
U6atac_ENSG00000221023.1	0	0	0	0	0	0	0	0	0	0	0	0	0	0	0	0	0	0	0	0	0	0	0	4	0	0	0	0	0	0	0	0	0	0	0	0	0	0	0	0	0	0	0	0	0	0	0	0	0
Y_RNA_ENSG00000200179.1	0	2	1	3	3	3	4	8	8	5	3	7	1	4	11	1	4	4	5	9	5	9	1	2	2	4	4	4	2	1	3	5	4	1	4	2	3	1	5	6	2	5	2	3	2	0	0	1	6
POLD2P1_ENSG00000213730.3	13	11	3	2	5	5	8	2	3	20	15	2	3	4	1	4	2	2	28	18	0	1	4	5	3	4	2	0	6	3	6	6	8	7	3	10	4	6	5	0	1	1	0	1	14	4	4	3	5
U6_ENSG00000207462.1	0	0	0	0	0	0	2	0	0	0	0	0	0	0	1	0	0	0	0	0	0	0	0	2	0	0	3	0	0	0	0	0	0	0	0	1	0	0	0	0	0	0	0	1	2	1	0	0	0
ZNF141_ENSG00000131127.8	361	146	240	332	400	458	445	437	723	369	329	725	396	295	364	404	248	36	621	427	394	33	184	146	137	9	346	56	281	455	209	136	335	432	226	380	217	186	234	359	355	217	142	162	69	426	282	235	505
AC093311.2_ENSG00000240623.1	0	2	0	1	1	0	1	0	1	1	2	0	3	1	1	0	1	0	0	0	0	1	0	0	0	0	0	0	1	0	1	2	1	0	1	1	1	4	3	1	0	0	1	0	0	0	1	1	1
AC087650.2_ENSG00000243582.1	1	4	0	2	3	2	3	1	8	4	4	6	3	1	1	0	0	0	0	1	1	4	0	1	1	0	1	0	0	3	0	2	2	6	4	10	3	3	0	0	0	2	0	5	2	2	3	1	3
PRRT2_ENSG00000167371.10	2386	4348	5549	12473	5554	5966	7061	823	2257	2993	8137	3444	11079	1811	4296	6462	2460	2221	2283	5814	5401	1719	3832	67	906	2649	5028	1409	3331	8700	2360	3465	4296	2420	2844	6131	9745	8732	11306	3850	6685	17117	6754	4167	3629	6300	6983	7190	4716
C17orf56_ENSG00000167302.4	2503	5968	2812	3885	3886	2560	4117	2840	4235	2009	2983	4391	4390	3912	4441	2799	2731	162	3697	6971	5042	2312	7182	717	2990	3307	1684	1321	3427	4708	5180	4841	4430	2949	4171	4656	3735	7429	9423	5340	6746	11610	10741	4566	6070	2779	4466	5552	5294
RP11-229M1.2_ENSG00000214908.3	3	2	3	3	1	4	0	6	5	3	3	1	4	14	14	4	0	3	12	2	2	6	2	20	4	0	0	3	1	0	0	4	7	0	2	3	5	2	2	0	3	0	2	0	2	1	1	4	1
U4_ENSG00000222790.1	3	3	3	2	5	1	3	3	0	1	3	2	7	0	4	0	0	0	5	6	2	2	1	3	0	4	0	1	1	1	0	0	2	0	0	1	0	3	2	2	1	3	3	1	1	1	0	1	2
RP1-286D6.2_ENSG00000235169.2	44	25	38	30	53	125	15	28	62	28	78	30	29	108	14	30	19	5	17	117	19	45	74	52	5	0	10	15	122	6	65	30	60	88	31	13	94	30	31	10	0	20	37	9	34	45	51	23	71
RP11-65N13.4_ENSG00000236465.1	152	349	52	160	151	117	170	284	203	74	119	79	144	182	36	136	36	15	61	288	25	27	238	107	30	110	61	35	304	96	265	118	223	233	176	29	150	272	102	65	48	45	62	53	347	149	133	203	198
RP11-195B21.3_ENSG00000155282.7	274	104	84	242	124	164	234	181	68	244	103	292	249	573	184	116	629	55	539	898	75	1376	62	37	80	90	217	382	343	377	140	289	137	389	502	779	7	392	153	449	234	449	243	411	292	612	169	1072	95
RP11-219G10.2_ENSG00000248880.1	0	0	1	0	0	1	2	0	1	0	0	3	1	1	1	0	0	2	0	0	0	2	2	11	0	0	0	0	0	4	1	1	0	2	0	0	1	2	1	0	1	0	0	0	2	1	1	0	0
FRG2C_ENSG00000172969.3	16	4	7	4	29	7	18	9	9	14	17	27	6	3	4	10	14	4	7	20	10	0	70	32	2	0	2	0	8	37	6	8	3	28	4	35	7	6	3	2	53	2	16	11	2	8	16	10	50
OPN1SW_ENSG00000128617.2	33	53	24	35	30	95	29	62	43	41	127	25	158	60	66	20	7	1	17	55	12	42	43	7	5	28	34	20	20	27	66	68	48	31	48	11	28	39	22	55	26	51	16	5	31	52	213	27	22
HOXD12_ENSG00000170178.5	0	1	0	0	0	0	0	0	0	0	0	0	10	7	0	0	0	0	0	4	3	2	0	6	0	4	0	0	0	0	0	1	0	0	1	0	2	4	2	4	0	0	0	0	0	1	0	0	1
AL645728.3_ENSG00000236684.1	2	1	0	2	2	1	0	1	1	0	1	0	1	0	0	0	0	0	1	0	1	2	1	2	0	0	0	0	0	2	0	1	1	0	1	2	0	0	1	1	0	0	2	0	3	0	0	0	1
SFTPB_ENSG00000168878.10	7	7	29	10	30	16	34	8	35	8	20	592	49	11	21	25	11	10	27	40	15	28	19	66	13	22	15	7	11	25	6	31	27	15	36	16	12	22	25	25	16	29	9	29	42	17	2	18	30
RP4-694A7.2_ENSG00000233589.1	16	30	4	6	9	32	31	47	7	4	9	17	5	18	1	4	3	0	4	40	4	10	4	42	2	22	6	6	8	6	19	6	16	17	5	5	17	14	7	5	8	6	4	2	125	36	5	227	8
AC044792.1_ENSG00000242505.1	0	0	0	0	0	0	0	0	0	0	0	0	0	0	0	0	0	0	0	0	0	0	0	0	0	0	0	0	0	0	0	0	0	0	0	0	0	0	0	0	0	0	0	0	0	0	0	0	0
RP11-417J1.1_ENSG00000249782.1	0	0	0	0	0	0	0	0	0	0	0	0	0	0	0	0	0	2	0	0	0	0	0	2	0	0	0	0	0	2	0	0	0	0	0	0	0	0	0	0	0	0	0	0	0	0	0	0	0
WDR49_ENSG00000174776.6	17	5	12	13	4	0	1	1	20	5	5	27	4	13	5	4	2	2	13	184	11	5	1	57	1	3	11	0	15	5	1	7	5	4	16	11	3	19	19	9	14	1	8	15	1	27	18	25	8
ST13P2_ENSG00000235616.1	8	10	6	4	2	7	4	4	0	3	3	2	3	7	2	0	2	2	1	2	0	0	3	8	0	6	2	1	5	2	8	1	4	12	1	2	6	7	2	0	0	0	3	1	5	1	10	3	1
RP11-423C15.3_ENSG00000229582.1	0	2	0	0	0	2	2	0	0	0	0	0	0	0	0	2	0	0	0	0	0	0	0	3	0	0	0	0	0	0	0	1	0	0	0	0	0	1	0	1	0	0	0	0	1	0	2	2	0
RP11-810D13.1_ENSG00000242318.1	38	41	69	59	70	53	42	60	54	80	41	71	29	44	81	33	26	23	72	86	56	98	16	30	43	28	122	29	44	53	42	51	27	24	74	62	15	22	44	61	10	48	38	49	25	26	25	36	33
INO80D_ENSG00000114933.10	1671	1505	1529	1466	2138	1941	1973	2070	1967	2026	1908	2102	2111	2182	2314	927	750	213	1362	1398	1633	1401	1726	733	810	1256	1504	1162	1915	1523	2079	2172	1949	2087	2042	1785	2594	2335	2334	1628	1455	2079	1447	883	2986	2114	1572	1977	2340
MGRN1_ENSG00000102858.5	6911	11638	4495	10432	7373	12502	11546	11818	7472	5779	13257	5542	10445	10135	4809	9410	4326	555	5648	7011	15043	3906	20049	2280	2360	3759	4234	3331	10049	9084	16164	8226	13044	15870	7759	9735	10887	12271	11331	5208	8099	12304	10497	3782	12769	9008	12518	10594	8025
RP11-326C3.10_ENSG00000255089.1	12	20	7	10	29	12	31	0	16	7	29	11	71	0	16	13	17	0	6	5	6	22	30	1	3	5	7	0	6	10	7	26	21	9	9	8	23	93	11	33	12	20	7	11	16	15	31	14	29
AL358117.1_ENSG00000244454.1	0	0	1	0	0	0	0	0	0	0	0	0	0	0	0	0	0	0	0	0	0	0	0	3	0	0	0	0	0	0	0	0	0	0	0	0	0	0	0	0	0	0	0	0	0	0	0	0	0
C6orf15_ENSG00000204542.2	97	169	0	3	2	268	27	3	4	7	5	16	958	316	47	256	2	0	17	0	3	0	4	4	4	0	0	0	11	0	97	0	310	2	4	13	20	632	104	0	194	7	7	32	19	2	2	3	18
PTGER4P2_ENSG00000184523.2	7	0	3	0	3	2	7	3	6	0	2	4	4	8	9	7	2	0	2	7	2	1	3	21	2	0	3	1	1	6	7	13	7	4	1	8	3	0	8	13	7	1	13	2	3	5	1	12	1
COL1A2_ENSG00000164692.12	87415	363471	30152	304956	28626	237169	206372	22105	257607	106753	269142	110566	59421	10799	18639	36094	9472	4803	35160	34650	22770	4649	217323	8622	13617	22183	66432	1662	22701	66426	1199655	547509	136983	136123	186284	28810	68968	203864	129492	41495	43561	133323	94016	42492	90143	103914	674029	77575	153261
CTD-2308B18.1_ENSG00000251214.1	0	0	0	0	0	0	0	0	0	0	0	0	0	0	0	0	0	0	0	0	2	0	0	9	0	0	0	0	0	0	0	0	0	0	0	0	0	0	0	0	0	0	0	0	0	0	0	0	0
ALDOAP2_ENSG00000214297.3	6	43	3	23	5	34	14	20	5	1	15	4	14	15	6	14	2	7	3	10	3	4	37	26	5	11	4	7	27	1	22	7	21	25	20	7	30	37	12	7	2	7	25	3	58	26	35	14	26
RP11-508M1.9_ENSG00000213686.3	81	29	23	60	93	22	192	52	88	20	90	70	74	47	53	95	108	10	223	47	42	11	37	10	38	10	13	23	47	63	44	154	35	87	45	154	75	53	96	109	167	103	120	19	49	76	74	46	152
SNTA1_ENSG00000101400.5	1149	2152	619	1405	1217	1458	1671	618	1393	888	1798	875	1338	4976	593	658	558	40	669	2445	400	525	947	995	243	325	672	131	866	729	1751	1657	1204	2208	2874	470	2019	1066	1020	722	724	1122	953	605	2479	1027	5962	938	1289
IGHVIII-44_ENSG00000253588.1	24	0	42	216	174	16	0	142	18	50	0	18	2	0	0	0	1	4	4	16	0	5	52	3	0	12	30	0	16	8	66	0	34	116	12	0	108	36	72	10	6	14	20	0	728	30	26	772	168
MGAT4C_ENSG00000182050.7	108	8	10	2	3	3	3	1	2	17	29	11	24	0	3	4	6	0	0	3	1	2	14	18	0	0	0	0	16	6	28	0	26	8	0	3	0	6	4	6	15	1	17	5	3	1	12	57	4
SNORD108_ENSG00000239014.1	23	1	9	4	19	2	4	0	11	4	25	17	13	5	3	7	2	0	2	2	0	0	12	2	5	1	17	5	11	8	8	22	14	11	4	3	5	12	9	9	4	14	7	0	2	8	21	6	14
C1orf85_ENSG00000198715.6	2926	8170	1616	2220	1981	4817	2672	5424	3219	1585	3890	2307	3514	8615	1409	1875	1120	269	874	4733	1368	842	10540	1424	865	905	2528	1100	3471	1820	9475	4250	4079	4913	2428	1253	5184	6560	2897	1829	1761	3042	1801	976	3755	3494	4190	2593	3072
AKR7A2P1_ENSG00000229020.3	15	87	36	22	15	11	37	163	30	49	89	42	66	46	63	24	8	1	35	33	78	42	31	26	7	12	13	8	52	46	42	14	42	56	65	10	27	46	32	36	28	88	30	4	214	58	140	33	22
RAB7L1_ENSG00000117280.8	1077	2198	662	1237	1278	1071	762	1145	1348	565	2771	1003	1627	3096	306	937	510	69	446	1618	467	284	2301	2698	383	84	597	772	2491	945	3639	3045	3144	1219	370	358	1603	1063	670	942	616	670	760	558	1019	1207	2865	1407	1006
KBTBD6_ENSG00000165572.6	836	636	347	381	443	811	609	723	687	224	997	508	525	711	327	181	275	31	250	484	136	140	486	187	84	251	740	71	697	196	952	502	757	750	281	144	521	743	393	411	266	306	344	155	652	503	970	728	702
RP11-3B12.3_ENSG00000219445.2	0	0	4	7	2	2	4	2	3	4	5	9	3	3	1	2	3	3	25	34	8	3	0	10	2	5	7	4	2	3	3	2	2	3	5	8	6	5	1	5	4	1	2	0	3	3	0	3	3
AC018678.1_ENSG00000238675.1	0	1	0	0	0	0	0	0	1	0	0	0	0	0	0	0	0	0	0	0	0	0	0	0	0	0	0	0	0	0	0	0	0	0	0	0	0	0	0	0	0	0	0	0	0	2	0	0	0
RP11-521D12.1_ENSG00000240687.1	0	0	0	2	0	1	3	0	0	3	2	0	0	0	0	0	0	0	1	0	0	0	0	10	0	0	0	0	3	0	2	0	5	1	2	0	2	0	0	1	6	2	0	0	0	2	4	1	0
RP11-288G11.3_ENSG00000234531.2	190	264	140	115	175	116	126	127	126	191	167	67	308	97	91	130	71	8	84	485	56	92	260	23	82	255	172	15	427	177	266	159	216	179	136	41	240	135	135	89	132	127	116	63	163	285	295	142	203
PLEKHB2_ENSG00000115762.12	4490	8050	1838	2197	2819	5796	3947	7736	3449	2090	4450	2189	4673	8648	1561	2208	949	324	1247	2459	1642	1506	6348	6226	820	2206	2348	3428	6381	2046	7865	3123	6408	9884	2920	1079	5235	6972	3566	2413	1873	2039	2477	1199	7082	5118	4018	4569	4706
SPTBN2_ENSG00000173898.6	6475	12314	5226	3688	6454	23868	4022	452	2019	3988	5638	6651	12461	9842	2703	13204	2419	294	5774	7719	1875	2938	24821	2093	2505	1688	437	2888	10428	9802	12783	18835	6865	9580	5325	4128	10258	16918	9422	4077	5104	4990	6163	1619	5065	7523	8979	3229	17966
RPL41P1_ENSG00000227063.4	4757	8197	1560	3634	3626	3012	5952	7998	5336	1898	2730	2173	3581	4829	876	3766	1048	544	1931	8210	597	573	6881	3953	579	3282	1881	807	9049	2163	7315	2872	6008	6224	4440	460	3216	8052	2848	1544	1125	739	1565	1515	9344	3299	3497	5671	4917
ANKRD11_ENSG00000167522.8	32830	31594	25652	31846	25896	44463	34670	40954	26904	27476	28395	25063	35739	23043	47915	18698	23344	27921	30178	57698	64279	23106	39903	4297	23400	42996	25027	46077	28327	24176	25968	25672	37739	24219	54753	29215	26092	39478	34347	25724	17550	24165	33407	28410	28728	19310	20908	49105	21312
U6_ENSG00000207394.1	0	0	0	0	0	0	0	0	0	0	0	3	0	3	0	0	0	0	0	1	8	0	1	2	0	0	2	0	0	1	0	0	0	0	1	0	0	0	0	5	0	1	0	0	0	0	0	0	0
U66059.29_ENSG00000186163.5	0	0	0	0	0	0	0	14	0	0	2	0	0	0	0	0	0	4	4	0	0	0	0	7	0	0	3	0	0	0	0	0	0	0	0	2	0	0	0	0	0	0	0	2	0	0	0	2	4
NUP210_ENSG00000132182.7	3244	2839	2388	2017	3362	3477	2969	7583	2191	2901	3311	2763	2438	808	864	3809	2533	486	1943	8021	1890	1148	2763	768	3262	111	1137	841	3836	2939	5109	5194	5046	6395	264	7388	2432	3309	4041	9597	3967	2640	4252	3148	11569	6758	2787	6732	3582
snoU13_ENSG00000238853.1	9	12	7	3	8	10	12	11	12	9	7	6	4	8	6	5	3	0	3	11	5	4	24	15	7	0	1	0	4	4	8	3	8	8	2	6	9	9	9	6	0	2	6	0	7	4	8	18	6
RP3-512E2.2_ENSG00000226455.1	43	22	2	32	50	13	28	8	22	31	33	2	7	32	0	2	16	4	1	8	10	5	18	2	13	1	4	0	9	19	36	14	51	55	59	30	7	30	21	57	0	17	14	9	8	6	30	16	20
LRIG3_ENSG00000139263.7	2551	1705	2100	2047	2038	2159	2591	1840	3414	1071	3883	2456	1773	2325	624	1140	894	96	1581	659	1140	508	1741	385	461	660	756	90	3382	2036	5184	8143	1826	3963	2034	2273	1410	5297	1998	1603	3572	2147	1402	655	2868	2489	3181	1572	1732
Y_RNA_ENSG00000223300.1	8	1	5	4	6	5	4	4	8	2	14	5	1	3	8	12	2	1	9	5	4	7	7	5	5	3	4	1	2	2	5	4	1	1	0	1	13	9	2	0	1	0	3	2	4	7	2	6	1
RP11-851M3.2_ENSG00000254713.1	4	1	0	3	2	1	0	0	1	3	1	7	0	0	0	2	4	0	4	3	1	0	2	2	0	1	5	0	0	0	0	2	3	1	2	2	1	0	0	2	4	0	3	6	1	2	1	2	3
RP11-321N4.3_ENSG00000223998.1	65	42	36	26	41	20	39	55	69	62	43	31	66	93	11	9	7	0	18	14	7	28	58	8	24	22	25	10	26	49	26	52	62	61	48	37	44	43	59	52	20	25	20	10	30	33	43	41	54
XAF1_ENSG00000132530.10	6214	9218	25522	13708	10158	7946	29208	1853	9317	23237	3351	14544	20441	18625	7832	9338	6639	1505	44266	29715	33942	2135	1621	3066	5686	2031	2640	2951	9742	14752	6115	3621	18741	2490	17378	17264	6544	4700	46412	11519	6130	9121	17854	10609	4381	18834	5074	27758	11101
AC005062.3_ENSG00000213860.3	1093	1449	417	585	1020	1119	749	825	999	671	695	581	646	1152	260	345	184	114	328	603	225	263	875	1038	132	597	500	378	805	359	1453	580	1275	1422	679	111	748	1212	950	683	295	171	439	402	933	719	1021	988	779
AC024248.1_ENSG00000241681.1	1	0	0	0	0	0	0	0	0	0	0	0	0	0	0	0	0	0	0	0	0	0	0	0	0	0	0	0	0	0	0	0	0	0	0	0	0	0	0	0	0	0	0	0	0	0	0	0	0
AC008074.4_ENSG00000223863.1	0	0	0	0	0	1	0	0	0	0	0	0	0	0	0	0	0	0	0	0	0	0	0	0	0	0	0	0	2	1	0	0	1	2	1	0	0	0	0	1	0	0	0	0	0	0	0	1	0
KIAA1191_ENSG00000122203.10	3698	5922	1052	2699	2219	3805	3612	5380	2515	1590	4602	1701	4818	4877	889	1485	782	411	1197	1784	626	876	4810	2558	984	1707	1720	1538	4346	2134	7079	2719	3852	6891	2308	1062	4317	5147	3264	1856	1834	2279	2374	1492	3580	4262	6534	2934	3762
PRM2_ENSG00000122304.5	0	0	0	0	1	0	0	0	0	0	0	3	1	0	0	0	0	0	0	0	2	0	0	4	0	2	0	0	0	0	0	0	2	0	0	0	0	0	2	0	0	0	0	0	0	0	0	0	0
RNASE6_ENSG00000169413.2	192	102	44	82	179	164	75	51	566	71	138	39	421	52	29	42	22	8	10	265	77	9	74	59	50	57	216	1	33	111	216	111	348	124	59	40	117	91	180	231	59	34	80	149	10	65	118	428	80
RPL35AP26_ENSG00000243607.2	1	3	1	0	5	1	1	1	3	0	8	0	5	1	0	0	2	0	0	4	2	0	0	1	1	2	0	0	2	0	0	1	1	0	2	3	0	2	1	2	1	0	1	0	0	4	0	0	2
MYBPHL_ENSG00000221986.2	61	62	225	111	86	108	163	42	4	233	75	649	309	2	163	245	56	0	66	79	127	0	145	14	20	3	4	21	26	201	137	50	197	47	315	108	345	59	31	174	141	187	16	27	6	68	48	24	51
AC011718.1_ENSG00000216522.3	603	81	393	217	157	238	283	44	68	190	1032	395	169	160	157	209	856	19	87	102	105	205	617	25	77	112	468	307	456	275	296	422	231	1606	167	453	327	311	464	224	782	179	154	172	1102	183	335	201	1109
AC092155.1_ENSG00000229503.1	90	149	42	54	114	63	65	60	102	64	79	57	95	150	22	21	17	11	28	38	15	21	72	93	13	43	35	99	57	25	91	36	114	294	48	16	77	112	70	52	38	10	47	37	87	56	107	67	61
WBSCR17_ENSG00000185274.7	602	374	71	228	106	125	143	57	7	1688	1156	89	107	24	244	85	53	4	35	66	64	43	193	50	22	23	9	5	66	220	636	141	482	482	123	77	84	104	234	354	155	281	618	437	105	124	3208	745	335
AC092431.1_ENSG00000234198.2	312	302	170	91	321	96	282	297	93	59	646	162	219	128	96	204	137	25	37	81	59	27	313	289	27	76	93	105	415	196	572	261	226	873	36	142	356	259	263	121	188	102	140	27	202	371	196	159	468
AC092958.1_ENSG00000221457.1	0	0	0	0	0	0	0	0	0	0	0	0	0	0	0	0	0	0	0	0	0	0	0	0	0	0	0	0	0	0	0	0	0	0	0	0	0	0	0	0	0	0	0	0	0	0	0	0	0
FAM8A2P_ENSG00000254722.1	1	0	0	0	0	0	2	0	0	0	0	0	0	0	1	0	0	0	0	0	0	0	0	2	0	0	0	0	0	0	0	0	0	0	0	0	0	0	0	0	0	0	0	0	0	0	2	0	0
RP11-47G11.3_ENSG00000213438.2	2	11	1	6	9	14	17	1	31	9	40	41	41	13	10	25	1	2	13	12	4	42	23	5	6	9	0	4	3	12	4	20	9	5	54	15	16	55	41	49	10	25	0	0	3	4	3	6	12
TRAK2_ENSG00000115993.6	2272	2613	1287	1492	2258	1475	2447	1591	2097	1925	3687	1553	2007	1284	885	537	525	230	595	614	463	522	1331	3881	491	425	1610	657	1390	1393	3130	1440	1895	2794	2296	822	1373	1599	1702	1162	1143	1242	2303	2141	1500	1330	4615	1938	1791
RP1-137K2.2_ENSG00000233044.1	32	36	20	20	13	17	18	34	18	24	50	24	25	20	10	6	4	2	1	5	16	10	29	14	3	11	4	14	20	19	79	5	29	57	20	23	26	30	22	22	6	20	37	10	27	22	84	26	37
DRD2_ENSG00000149295.9	67	74	38	212	138	146	99	9	43	137	93	46	97	6	558	533	378	50	538	13	178	59	28	6	102	0	196	2	93	124	357	66	63	111	196	328	12	51	115	1273	659	253	149	733	13	35	115	63	154
Y_RNA_ENSG00000206998.1	0	0	1	0	0	0	0	0	0	0	0	0	0	0	0	0	0	0	0	0	0	0	0	0	0	0	0	0	0	4	0	0	0	0	0	0	0	0	0	0	0	0	0	0	0	0	0	0	0
C11orf42_ENSG00000180878.2	5	55	11	15	15	10	46	44	19	15	35	33	134	5	15	7	4	0	1	7	5	10	40	7	18	13	4	0	10	35	9	16	30	12	2	26	71	47	36	27	26	39	17	0	68	39	30	10	34
snoU13_ENSG00000238902.1	1	0	0	0	0	0	0	0	1	0	0	0	0	1	0	0	0	0	11	0	0	4	14	0	0	0	0	0	0	0	0	0	0	0	2	0	0	0	0	2	1	0	0	1	0	0	0	0	1
CCBL2_ENSG00000137944.12	930	1127	649	672	849	969	703	1887	704	886	1109	762	779	1356	538	481	309	120	1609	664	613	242	677	359	283	376	902	646	712	758	2005	378	1127	1606	389	573	801	672	838	791	581	862	580	378	875	891	989	903	1041
RP11-160N1.7_ENSG00000233660.1	6	1	5	2	5	1	4	5	1	0	2	1	3	1	12	6	2	0	12	33	0	7	2	10	0	9	6	9	6	1	7	7	0	1	6	6	1	2	4	5	8	5	2	2	3	4	2	4	7
AC007038.7_ENSG00000229127.1	256	91	305	115	287	120	405	187	254	190	395	464	378	176	376	134	129	3	221	150	158	139	153	22	117	92	123	39	187	290	225	505	227	280	66	236	188	303	257	155	429	492	166	96	153	144	158	161	297
PGAP3_ENSG00000161395.7	2914	7087	2010	2986	5062	3365	2820	1939	2507	1566	4412	3419	3741	3630	2457	1762	1621	142	1963	5341	2098	972	6513	242	667	2579	1720	298	8524	2655	6529	3734	4285	5546	2362	1947	8317	5196	3091	3660	6449	4462	2888	974	2592	3175	2736	1966	17002
U7_ENSG00000252579.1	48	83	40	66	85	167	140	108	79	53	143	66	87	66	139	46	48	16	71	143	170	59	162	18	58	110	43	51	103	69	113	69	94	108	80	62	105	146	88	52	102	100	100	56	131	52	125	105	101
RP11-439A17.5_ENSG00000228654.1	0	1	0	0	0	0	0	0	12	0	1	0	3	0	4	1	0	1	0	0	1	3	0	6	2	0	0	0	0	0	0	0	0	0	1	0	0	0	0	0	0	0	1	1	0	0	0	3	0
RP11-399F4.1_ENSG00000239812.1	7	0	4	0	2	0	11	0	5	2	2	7	11	9	0	1	17	0	1	0	0	5	2	3	0	0	2	0	10	13	6	6	2	6	10	15	0	18	2	8	8	1	2	12	6	4	7	14	4
OSBPL2_ENSG00000130703.9	2067	2956	3431	2648	2386	3834	3435	3276	2267	3331	2976	2359	3860	4027	2196	2260	1094	313	2786	2587	5374	1661	4402	1751	1287	1135	2382	1667	3234	2896	3231	1650	3377	4933	1883	3307	7497	5883	3466	2166	2505	2173	2511	1112	2203	4529	2946	2125	3032
AC009123.1_ENSG00000250685.2	26	21	11	6	23	742	159	0	21	14	4	127	12	50	6	13	11	0	257	9	3	4	18	30	4	2	54	0	4	48	16	13	16	43	233	23	3	514	26	51	23	27	18	31	9	9	32	38	27
RP11-1143G9.2_ENSG00000257818.1	23	10	32	15	28	16	20	56	40	7	54	43	22	0	56	26	13	2	73	11	25	461	50	2	32	16	16	11	31	89	23	137	33	13	9	45	4	38	8	692	50	108	24	6	30	43	12	8	28
C10orf11_ENSG00000148655.8	481	70	70	126	304	246	117	32	494	326	452	133	504	595	195	59	235	20	52	136	90	211	541	192	43	233	214	520	60	162	329	441	652	299	38	188	133	68	211	312	170	80	67	73	26	215	304	168	177
UQCRHP2_ENSG00000237629.1	1	0	0	0	0	0	0	2	0	0	0	0	2	0	0	0	0	0	0	2	0	2	0	6	0	0	0	0	0	1	0	0	1	3	0	1	1	0	0	0	0	1	0	0	0	1	0	1	1
IGLV3-19_ENSG00000211663.2	22	0	15	63	291	44	7	28	44	79	8	56	17	0	5	31	6	10	45	121	55	6	189	1	24	89	9	1	9	2	225	11	102	81	6	0	81	5	122	69	8	5	16	0	983	125	23	1717	424
SLC35A4_ENSG00000176087.9	3381	8048	1599	3243	2824	7515	5730	6431	2928	1353	4410	1954	5204	5656	1094	1884	1053	344	1342	3729	654	1385	5681	1933	719	2586	2814	1747	3803	2285	8909	3086	5558	10354	3037	1454	5764	8028	5451	2871	2700	3854	3656	1769	4977	10650	6880	3743	5176
AC092156.7_ENSG00000242316.1	0	0	0	0	0	0	0	0	0	0	0	0	0	0	0	0	0	0	0	0	0	0	0	0	0	0	0	0	0	0	0	0	0	0	0	0	0	0	0	0	0	0	0	0	0	0	0	0	0
TRIB1_ENSG00000173334.3	2328	5132	931	2233	1185	3775	2826	1269	916	2166	1864	1613	2211	7052	789	3157	524	229	867	2790	1067	307	1820	3543	649	1444	605	800	6250	1450	3629	1568	2113	4327	2501	1234	1809	3457	2256	912	1397	982	2054	451	2976	2067	1734	1807	3650
AC002094.1_ENSG00000255604.1	1442	250	414	119	2484	208	1286	35	508	145	5558	740	505	59	61	156	1125	13	49	110	99	40	630	72	100	86	294	0	343	667	873	3221	204	8669	199	516	649	1064	1574	207	586	249	396	130	124	890	947	181	1620
CTC-512J14.7_ENSG00000184188.6	147	197	61	90	83	194	125	126	72	71	127	67	117	279	20	92	10	12	5	77	33	10	195	63	25	62	32	18	116	46	164	125	156	231	139	28	229	151	109	57	41	76	77	26	243	199	206	140	197
SHISA9_ENSG00000237515.3	132	5	9	0	2	14	21	0	4	4	97	2	3	0	4	6	23	5	2	14	2	1	43	23	0	0	4	0	1	10	19	243	4	67	3	23	5	28	4	2	4	13	2	9	10	12	128	8	17
AC114737.3_ENSG00000236280.1	48	48	62	64	34	78	188	81	47	73	67	280	79	62	50	61	11	5	184	124	163	156	59	20	49	54	27	70	126	100	47	49	39	39	34	171	98	137	69	64	65	150	77	11	75	110	40	80	138
UGDH_ENSG00000109814.7	1561	3109	453	1243	1016	1859	1813	2699	1902	881	1519	787	1227	2512	470	491	273	166	323	968	209	293	935	2540	249	910	503	585	1915	847	3282	1148	1125	2915	2027	400	1742	5900	797	741	290	270	1009	453	2148	2264	1398	1383	1328
NDUFA5_ENSG00000128609.9	2439	2038	1096	1286	1297	2515	2040	2853	1323	1180	2193	1189	1006	2511	895	621	443	126	444	1015	276	577	866	1196	238	1308	1320	665	3174	718	2220	1660	1998	2043	536	490	1486	2256	1118	730	492	685	1092	582	2470	2212	2209	2008	2358
AC025576.1_ENSG00000252801.1	21	21	3	8	6	2	24	24	10	10	13	19	8	9	1	4	4	0	7	12	3	6	12	8	4	1	1	5	9	10	20	7	7	26	10	13	12	10	15	5	15	9	5	3	15	13	12	7	10
DBNDD1_ENSG00000003249.7	1786	494	570	797	1099	2975	651	6105	470	986	1621	266	2736	1185	1237	867	484	303	250	4714	964	438	5937	1350	361	743	419	326	2294	1123	2041	1820	2346	2174	51	451	2903	600	1725	652	576	423	1215	330	8014	1665	1386	1329	3628
5S_rRNA_ENSG00000222835.1	3	0	0	0	0	2	0	2	0	0	0	2	0	0	3	0	0	0	0	4	1	0	0	5	0	0	0	0	0	0	0	0	2	1	1	2	0	0	0	3	0	9	0	8	2	0	0	5	0
DOPEY2_ENSG00000142197.7	2435	2197	1870	1407	2026	2802	2498	1943	1856	2976	2815	1636	6278	3185	1932	1575	697	151	656	1167	2443	963	1600	1245	1408	1188	825	760	4948	1950	4315	2905	4635	2131	900	2155	5259	1475	2428	2025	1181	2401	3376	665	3154	3736	2304	2379	4513
RP11-179H18.7_ENSG00000232823.1	12	26	3	19	2	38	28	16	3	25	8	7	22	1	8	20	7	1	10	7	7	4	18	4	6	11	9	13	42	10	23	14	27	4	10	2	20	23	4	2	2	12	2	2	1	50	1	24	24
snoU13_ENSG00000238296.1	0	0	0	0	0	0	0	0	1	0	0	1	0	0	0	0	0	0	0	0	0	0	0	1	0	0	0	2	0	0	0	0	2	1	0	0	0	0	0	0	1	1	0	0	3	0	0	0	0
RP11-195F19.9_ENSG00000230074.1	66	21	24	52	19	44	49	17	69	30	75	32	37	63	20	16	45	4	9	37	23	5	48	42	4	16	41	6	48	54	58	93	59	77	50	27	48	31	49	31	22	15	39	20	9	91	61	39	43
AC006390.4_ENSG00000251638.1	0	0	0	0	0	0	0	0	0	0	0	0	0	0	0	0	1	0	0	0	0	0	0	0	0	0	0	0	0	0	0	0	0	0	0	0	0	0	0	0	0	0	0	0	0	0	0	0	0
ELOVL6_ENSG00000170522.5	1005	2520	794	483	630	659	1111	2533	430	511	526	499	1087	1371	60	817	262	105	383	931	519	165	635	694	148	375	184	24	2615	484	2545	717	984	1451	210	755	1698	466	631	929	175	280	705	118	2154	3814	578	913	1555
RP11-778J16.3_ENSG00000257400.1	0	0	3	0	4	0	1	0	2	0	0	0	2	0	0	0	0	0	2	1	0	0	0	2	0	0	2	0	0	0	0	0	0	0	1	0	0	0	0	0	0	0	0	0	0	0	0	1	0
RP11-144O23.8_ENSG00000256651.1	7	13	51	3	21	18	16	14	47	19	17	44	21	3	39	9	7	1	47	46	11	10	5	5	3	21	41	0	3	39	12	11	18	11	31	24	2	16	27	45	31	54	1	18	4	31	12	8	2
5S_rRNA_ENSG00000222740.1	0	3	0	2	0	3	5	2	0	1	6	0	0	0	0	0	0	0	1	0	2	0	0	0	1	0	0	0	0	1	25	3	3	1	4	1	2	2	1	1	0	1	0	2	2	0	9	0	1
[truncated: 46,957 more rows]
[truncated: 2 more columns]
